# Supplementary material for: Transcriptome sequencing and analysis reveals the molecular response to selenium stimuli in Pueraria lobata (willd.) Ohwi
Source: PeerJ. 2020 Mar 24;8:e8768. doi: 10.7717/peerj.8768 (PMC7100600; doi:10.7717/peerj.8768)
Supplement: Table S7 — D0, D1, D3, D5, D7 and D9 represent different days after sodium selenite treatment. [file peerj-08-8768-s012.xls]

## Sheet: 4246 DEGs
Table S7. Identification of 4246 DEGs.
Gene ID	NR annotation	GO annotation	KEGG annotation	Expression profiles（TPM）
				D0-1	D0-2	D0-3	D1-1	D1-2	D1-3	D3-1	D3-2	D3-3	D5-1	D5-2	D5-3	D7-1	D7-2	D7-3	D9-1	D9-2	D9-3
T_101349_c0_g1	gi|1012360378|gb|KYP71562.1| hypothetical protein KK1_010826, partial [Cajanus cajan] 6.1e-21	-	-	21.1185	7.86341	2.83842	1.22056	4.3951	5.46586	1.03923	2.7048	1.01541	0.920175	2.45564	3.67099	2.24786	1.34704	1.34089	0.205145	1.27236	2.78172
T_101869_c0_g1	gi|356504666|ref|XP_003521116.1| PREDICTED: transcription factor RADIALIS-like [Glycine max] 5.4e-34	GO:0003677, DNA binding;GO:0005634, nucleus;GO:0006351, transcription, DNA-templated;GO:0006355, regulation of transcription, DNA-templated;GO:0009908, flower development;GO:0048262, determination of dorsal/ventral asymmetry	-	6.34237	6.94328	4.16713	1.30066	4.36478	5.33809	4.08108	1.91098	2.74492	1.43134	1.19125	2.93689	1.54664	0.745706	2.1528	0.928274	3.61924	5.90304
T_102266_c0_g1	gi|734432379|gb|KHN46302.1| hypothetical protein glysoja_045313 [Glycine soja] 2.0e-44	GO:0048364, root development	-	2.01366	1.12801	1.28252	6.63909	1.93098	2.76471	18.9078	3.91383	0.75265	3.18102	2.95426	1.44037	0	0.333223	2.38095	3.39417	0.356726	0.527509
T_11758_c0_g1	gi|734431783|gb|KHN45965.1| hypothetical protein glysoja_030702 [Glycine soja] 1.5e-55	-	-	1.9277	2.72809	2.82931	0.369703	2.41779	1.56978	4.72724	2.74581	2.76701	2.5066	5.79696	1.65445	2.70564	2.21925	3.77693	12.9215	7.41421	11.2828
T_11984_c0_g1	gi|593694795|ref|XP_007147909.1| hypothetical protein PHAVU_006G165200g [Phaseolus vulgaris] 1.3e-29	-	-	1.47018	0.882224	0.816082	0.481463	0.140726	0.258551	1.42109	1.70436	2.26347	1.685	2.41673	0.229657	0.524668	1.4644	1.8481	9.3158	6.33304	7.92382
T_12150_c0_g1	gi|356556052|ref|XP_003546341.1| PREDICTED: class-10 pathogenesis-related protein 1-like [Glycine max] 5.4e-75	GO:0006952, defense response;GO:0009607, response to biotic stimulus	-	4.68617	5.28606	1.24759	10.6621	5.65316	11.5089	3.38378	2.06672	4.90417	5.42785	2.57631	9.05235	9.67751	10.2851	2.5134	6.81775	4.68386	3.13165
T_12933_c0_g1	gi|947065943|gb|KRH15086.1| hypothetical protein GLYMA_14G067700 [Glycine max] 4.5e-19	-	-	14.0171	19.8883	21.2529	3.89584	13.7697	6.03245	30.0035	26.887	20.8302	45.0933	18.4825	11.1355	14.1095	31.9626	11.8395	71.5439	58.3449	63.3648
T_14588_c0_g1	-	-	-	3.41897	4.62989	7.16472	0.257338	0.682044	1.44294	1.6744	1.54534	1.48952	0.958927	0.20349	1.10338	1.65734	0.806353	0	1.56478	0.89785	7.25291
T_15738_c0_g1	gi|1012347052|gb|KYP58244.1| hypothetical protein KK1_004539 [Cajanus cajan] 1.2e-15	-	-	14.2852	8.79018	6.76556	3.52819	2.92438	7.3647	4.2926	3.18575	3.97482	1.69375	4.25983	4.07442	4.12884	2.89083	1.62007	4.09274	4.46786	8.36025
T_16052_c0_g1	gi|356535161|ref|XP_003536117.1| PREDICTED: mitochondrial import inner membrane translocase subunit TIM23-1 [Glycine max] 2.5e-76	GO:0005743, mitochondrial inner membrane;GO:0005744, mitochondrial inner membrane presequence translocase complex;GO:0006626, protein targeting to mitochondrion;GO:0015450, P-P-bond-hydrolysis-driven protein transmembrane transporter activity;GO:0030150, protein import into mitochondrial matrix;GO:0031305, integral component of mitochondrial inner membrane	-	5.71145	10.2641	8.94048	17.7496	16.1523	18.4105	14.9552	12.5852	22.3024	15.0239	10.7874	14.9205	16.1254	18.6951	12.3594	13.697	12.2842	12.7895
T_16309_c0_g1	gi|955348428|ref|XP_014619154.1| PREDICTED: uncharacterized protein LOC106795111 [Glycine max] 2.4e-29	GO:0048364, root development	-	9.34627	14.8334	6.46048	3.70233	9.68893	19.2996	5.60903	3.85955	2.83527	3.08167	4.09907	11.0914	4.75531	0.72612	0.838436	2.46407	6.08313	4.98393
T_17039_c0_g1	gi|734378297|gb|KHN21982.1| Zinc finger protein ZAT8 [Glycine soja] 1.8e-63	GO:0003700, DNA binding transcription factor activity;GO:0005634, nucleus;GO:0006351, transcription, DNA-templated;GO:0006979, response to oxidative stress;GO:0009408, response to heat;GO:0009409, response to cold;GO:0009416, response to light stimulus;GO:0009611, response to wounding;GO:0009631, cold acclimation;GO:0009643, photosynthetic acclimation;GO:0010200, response to chitin;GO:0010224, re…	-	0.737564	1.45816	2.31895	0.147275	0.320557	0.0596226	1.70319	0.885253	0.7966	0.944232	1.28682	1.4766	0.538159	0.731247	0.369143	8.52675	3.45727	5.67069
T_17837_c0_g1	gi|734400476|gb|KHN31480.1| hypothetical protein glysoja_035587 [Glycine soja] 2.0e-43	-	-	1.29068	3.3981	6.57484	2.32171	4.73079	2.94756	11.6852	6.72701	9.73943	21.13	8.51021	3.56157	10.7127	13.1882	2.14229	78.0267	51.5404	35.8925
T_19208_c0_g1	gi|950996733|ref|XP_014505827.1| PREDICTED: uncharacterized protein LOC106765654 [Vigna radiata var. radiata] 7.8e-47	-	-	8.53008	5.93783	9.39247	2.00722	3.04196	2.60209	4.84785	5.56956	4.68603	2.15018	4.42414	4.71017	6.55567	4.5103	7.04452	5.6269	4.40026	6.65734
T_20280_c0_g1	-	-	-	14.1814	4.94504	3.45432	1.65512	3.16055	2.07549	2.47374	2.20591	2.42919	1.07935	1.90501	3.02151	1.61723	1.2797	5.5433	2.98438	4.2553	3.85745
T_21937_c0_g1	gi|571461021|ref|XP_006581875.1| PREDICTED: calcium-binding protein CML38-like [Glycine max] 2.6e-50	GO:0005509, calcium ion binding;GO:0005886, plasma membrane;GO:0009611, response to wounding	-	3.50439	3.81382	5.30527	0.327933	1.08424	0.371906	4.12898	2.59705	1.31023	3.3163	4.95023	1.55015	2.44841	2.60465	0.657261	20.99	15.7838	16.2946
T_22188_c0_g1	gi|356522722|ref|XP_003529995.1| PREDICTED: probable polyol transporter 6 [Glycine max] 9.4e-270	GO:0005351, carbohydrate:proton symporter activity;GO:0005354, galactose transmembrane transporter activity;GO:0005355, glucose transmembrane transporter activity;GO:0005365, myo-inositol transmembrane transporter activity;GO:0005886, plasma membrane;GO:0005887, integral component of plasma membrane;GO:0010311, lateral root formation;GO:0015145, monosaccharide transmembrane transporter activity;G…	-	1.52221	2.74217	2.73172	3.20252	3.52315	2.69527	7.45903	5.54413	10.3824	4.68976	9.22888	3.73174	4.58936	8.91216	11.1441	6.18333	2.22637	2.78409
T_22685_c0_g1	gi|356538184|ref|XP_003537584.1| PREDICTED: uncharacterized protein LOC100819278 [Glycine max] 1.8e-49	-	-	6.37436	14.426	18.6933	0.115837	0	0	0	0	0	0	9.37494	15.3404	0.573024	0	0	0	0	0.454558
T_22695_c0_g1	gi|922382201|ref|XP_013461328.1| hypothetical protein MTR_3g088705 [Medicago truncatula] 4.9e-09	-	-	5.95538	5.08243	4.82497	5.67402	8.6975	5.62548	6.06971	8.15625	5.70804	9.58356	4.43217	5.24218	10.5665	14.3206	5.3141	7.01249	13.2545	17.1204
T_23284_c0_g1	gi|358248722|ref|NP_001239929.1| uncharacterized protein LOC100788535 [Glycine max] 9.5e-60	-	-	7.40623	5.41499	8.49046	1.02148	2.85844	4.07645	2.54692	3.33593	1.82152	2.58674	2.02851	2.61266	2.07357	2.41513	1.3585	3.92445	2.33582	2.64162
T_2378_c0_g1	gi|947122804|gb|KRH71010.1| hypothetical protein GLYMA_02G123600 [Glycine max] 1.1e-15	-	-	2.28518	2.10677	2.32551	1.12991	3.25569	1.5602	3.89851	2.51423	3.07997	9.56262	2.30273	5.42808	7.9161	18.0766	1.97507	36.1076	18.5385	21.8087
T_24162_c0_g1	gi|571475545|ref|XP_006586680.1| PREDICTED: uncharacterized protein LOC100789109 isoform X1 [Glycine max] 1.9e-75	-	-	8.98734	4.46143	4.02623	2.31552	1.61029	2.35799	2.40699	2.80736	1.59046	1.11012	1.84726	1.1776	1.04434	1.4049	1.55525	1.42282	2.36419	2.91454
T_24468_c0_g1	gi|321172968|gb|ADW77268.1| CLE14 protein [Glycine max] 2.2e-33	-	-	0	0	0.155899	0	3.75651	0	1.17201	0	2.21072	2.14083	3.20222	0.984522	0.074535	2.20096	16.9544	2.31568	0.130158	0.601689
T_24686_c0_g1	gi|356516478|ref|XP_003526921.1| PREDICTED: U5 small nuclear ribonucleoprotein 40 kDa protein-like [Glycine max] 2.0e-267	-	-	9.40162	6.86312	5.50849	5.22352	3.85881	6.17466	3.96399	4.58408	2.32028	2.47525	3.01272	2.77605	2.41564	2.5856	3.07504	4.10581	5.29382	5.8963
T_24830_c0_g1	gi|734411927|gb|KHN36313.1| hypothetical protein glysoja_003436 [Glycine soja] 4.1e-50	-	-	1.24166	2.00563	1.98975	2.47913	4.62411	1.66347	4.3487	4.55801	6.89696	7.96214	11.3098	3.65242	2.47274	6.38863	3.85453	5.52433	3.57861	3.12498
T_24899_c0_g1	gi|672209337|ref|XP_008780730.1| PREDICTED: myosin regulatory light chain 2-like, partial [Phoenix dactylifera] 3.7e-62	GO:0005509, calcium ion binding;GO:0016459, myosin complex	-	1.3603	2.35664	3.01739	3.26135	3.09561	6.20499	3.1441	1.96773	3.66888	2.88979	2.74132	6.11242	3.90099	3.33599	3.78305	3.63783	8.1682	5.85176
T_25013_c0_g1	gi|734382906|gb|KHN23753.1| hypothetical protein glysoja_033636 [Glycine soja] 3.8e-28	GO:0016021, integral component of membrane	-	18.1748	15.5974	9.87304	2.78574	5.92818	8.01878	2.42724	4.02814	3.62236	4.6446	4.42007	7.10913	4.54017	6.72425	8.78455	11.0793	5.74273	5.1448
T_25027_c0_g1	gi|571442781|ref|XP_006575860.1| PREDICTED: uncharacterized protein LOC100804641 [Glycine max] 7.5e-35	GO:0016021, integral component of membrane	-	1.818	2.77991	3.48764	3.39514	4.63844	3.8131	3.9451	3.46629	5.36825	5.26356	2.8565	4.27416	6.54116	7.02032	4.68395	4.54101	4.75344	4.29462
T_25046_c0_g2	gi|351725491|ref|NP_001238118.1| uncharacterized protein LOC100527063 precursor [Glycine max] 4.7e-77	GO:0005886, plasma membrane;GO:0031225, anchored component of membrane	-	48.2471	38.0384	27.999	11.6983	19.6933	29.3683	15.7718	11.095	14.2541	11.9053	9.93555	26.2058	24.8394	14.0392	19.4709	11.4585	19.9176	27.4343
T_25144_c0_g1	gi|356563192|ref|XP_003549848.1| PREDICTED: putative calcium-binding protein CML19 [Glycine max] 5.9e-71	GO:0005509, calcium ion binding	-	4.48682	14.3299	30.0481	0.582742	3.94328	0.262268	44.2673	16.5735	10.2405	23.8474	39.3542	3.01436	14.502	9.10679	15.1086	174.426	118.768	88.5084
T_25928_c0_g1	-	-	-	13.3651	12.1524	11.4853	2.72099	1.72871	0.984445	1.29036	2.54401	2.70612	1.15588	9.26938	5.96851	3.02414	4.00213	1.57995	5.12155	2.24952	5.11126
T_26099_c0_g1	gi|734421109|gb|KHN41273.1| hypothetical protein glysoja_030111 [Glycine soja] 2.0e-24	-	-	11.1322	9.39334	9.89303	4.73902	5.04951	2.99782	5.04567	2.99604	3.79006	5.20094	6.43738	5.56994	2.07626	1.68515	2.92492	3.76286	6.67248	8.78458
T_26443_c0_g1	gi|356499259|ref|XP_003518459.1| PREDICTED: uncharacterized protein LOC100806235 [Glycine max] 2.7e-108	GO:0005886, plasma membrane;GO:0006952, defense response;GO:0016021, integral component of membrane	-	47.3124	18.0358	13.7464	5.00814	5.50428	11.957	4.09611	1.67743	3.62013	1.04433	1.98944	3.30372	4.33181	2.07178	2.87737	2.81574	7.03749	9.03217
T_26467_c0_g1	gi|356571794|ref|XP_003554057.1| PREDICTED: uncharacterized protein LOC100815187 [Glycine max] 1.2e-20	-	-	10.8445	8.91571	5.8205	1.67699	1.04342	1.92993	2.61306	4.17928	1.47238	1.2644	1.44156	2.74493	2.07603	1.75685	1.54465	3.74551	6.0397	9.66202
T_26774_c0_g1	gi|571473108|ref|XP_003530464.2| PREDICTED: protein GLUTAMINE DUMPER 5-like [Glycine max] 8.1e-30	GO:0006865, amino acid transport;GO:0016021, integral component of membrane;GO:0080143, regulation of amino acid export	-	13.2042	6.74522	5.27595	2.8145	4.28204	3.82109	4.16803	3.98466	1.96715	1.66773	2.11391	2.43808	3.5078	3.19374	3.62234	2.27051	2.40401	3.27803
T_27035_c0_g1	gi|965656371|dbj|BAT72790.1| hypothetical protein VIGAN_01022700 [Vigna angularis var. angularis] 1.7e-17	-	-	15.1217	13.7649	11.7912	10.9656	12.6416	22.5037	16.2921	19.0378	19.6709	18.7083	14.4623	18.5583	23.1362	29.1867	25.5306	24.5672	23.808	39.3851
T_27150_c0_g1	gi|1012354132|gb|KYP65319.1| hypothetical protein KK1_011552 [Cajanus cajan] 3.3e-18	-	-	6.78257	6.07791	7.24126	3.87349	6.99593	27.8451	3.62709	3.61053	8.95067	5.48827	5.64912	2.9159	21.8964	6.94147	13.8254	3.15886	13.8709	14.6061
T_27311_c0_g1	-	-	-	0.36205	0.839694	0	89.151	1.9573	0	1.45386	27.608	0.722905	2.59866	0	0	0	0	0	0	0	0
T_27373_c0_g1	gi|571500454|ref|XP_006594646.1| PREDICTED: uncharacterized protein LOC102661545 [Glycine max] 2.0e-121	-	-	28.2108	14.8033	11.3849	7.02539	8.65219	8.56613	9.14633	10.1652	5.82299	6.03513	6.63846	4.34798	7.62512	5.35169	9.01575	6.89425	7.09362	8.98367
T_27499_c0_g1	gi|593568213|ref|XP_007142538.1| hypothetical protein PHAVU_008G289200g [Phaseolus vulgaris] 1.9e-32	GO:0016021, integral component of membrane	-	7.95084	4.65507	5.639	2.83794	5.2117	2.40145	9.09395	6.73333	2.99244	4.71262	4.55981	3.16187	5.32174	8.55651	5.55172	23.5	5.38979	10.8514
T_27509_c0_g1	gi|734367903|gb|KHN18549.1| Activating signal cointegrator 1 [Glycine soja] 1.3e-202	GO:0002020, protease binding;GO:0003713, transcription coactivator activity;GO:0005634, nucleus;GO:0005654, nucleoplasm;GO:0005737, cytoplasm;GO:0005815, microtubule organizing center;GO:0005829, cytosol;GO:0006355, regulation of transcription, DNA-templated;GO:0006366, transcription by RNA polymerase II;GO:0008270, zinc ion binding;GO:0016922, ligand-dependent nuclear receptor binding;GO:0030331…	-	13.4641	5.8793	5.92019	3.63641	3.54695	4.90469	4.64279	6.55485	3.98589	2.76198	3.80613	2.10703	2.91447	2.84735	3.4711	3.06511	3.00398	4.41686
T_27561_c0_g2	gi|359806545|ref|NP_001241006.1| uncharacterized protein LOC100816015 [Glycine max] 8.1e-40	GO:0016021, integral component of membrane	-	12.939	18.2264	23.1755	0	1.12267	1.13754	15.602	5.15996	9.26177	4.31424	16.471	2.63861	3.409	1.90405	3.45006	36.8571	22.2371	64.3041
T_27610_c0_g1	gi|734356557|gb|KHN14209.1| hypothetical protein glysoja_028607 [Glycine soja] 1.3e-43	-	-	17.3318	7.42578	7.42859	4.27199	5.42031	6.3586	3.88147	3.70874	1.37235	4.5334	3.23704	3.89281	1.81648	1.04518	1.46213	2.94639	5.71776	9.16953
T_27819_c0_g1	gi|356569123|ref|XP_003552755.1| PREDICTED: auxin-responsive protein SAUR41-like [Glycine max] 1.1e-54	GO:0005737, cytoplasm;GO:0007275, multicellular organism development;GO:0009733, response to auxin;GO:0009734, auxin-activated signaling pathway;GO:0040008, regulation of growth	K14488-ko04075 Plant hormone signal transduction	19.2036	18.3615	15.8118	22.1706	17.6345	13.1754	21.4219	29.0933	22.4947	20.4437	32.0397	10.2055	24.7934	28.6098	42.6844	29.1861	31.1301	47.9693
T_27880_c0_g1	gi|734334004|gb|KHN07783.1| Glutaredoxin-C9 [Glycine soja] 4.4e-54	GO:0005623, cell;GO:0005634, nucleus;GO:0005737, cytoplasm;GO:0009055, electron transfer activity;GO:0009751, response to salicylic acid;GO:0009863, salicylic acid mediated signaling pathway;GO:0009867, jasmonic acid mediated signaling pathway;GO:0015035, protein disulfide oxidoreductase activity;GO:0045454, cell redox homeostasis	-	82.4275	146.037	153.867	18.1103	55.6479	28.7392	149.509	127.148	75.2196	132.187	140.272	66.821	94.8554	107.841	111.784	270.234	231.094	253.536
T_28089_c0_g1	gi|734405919|gb|KHN33688.1| hypothetical protein glysoja_013694 [Glycine soja] 5.5e-38	GO:0016021, integral component of membrane	-	22.1773	9.99713	10.2249	2.52223	7.31106	8.51932	2.57147	2.83915	4.19172	3.53589	2.82006	7.30426	4.66904	1.70969	3.53885	1.4547	5.52093	6.82452
T_28519_c1_g1	gi|356549295|ref|XP_003543029.1| PREDICTED: uncharacterized protein LOC100796589 [Glycine max] 5.3e-55	GO:0016021, integral component of membrane	-	2.80388	1.79171	1.16748	4.59019	2.68165	1.47963	2.58446	5.63251	3.93612	4.70691	1.81933	4.16047	5.24933	6.34479	6.60459	3.52127	2.37391	2.78635
T_29624_c0_g1	gi|734312249|gb|KHN00427.1| hypothetical protein glysoja_000095 [Glycine soja] 4.2e-138	-	-	4.25199	3.49277	1.48742	3.5878	6.40296	4.40329	5.70776	5.96375	3.10933	4.35911	7.43754	4.06349	5.77652	3.52828	12.1694	1.57881	1.59095	4.19647
T_29633_c0_g1	gi|734381829|gb|KHN23416.1| Pathogen-related protein [Glycine soja] 6.6e-81	GO:0006952, defense response;GO:0009607, response to biotic stimulus	-	32.7514	45.5715	27.9205	54.1623	49.275	46.3879	79.4573	74.5132	61.0821	62.9214	64.691	28.8256	47.8295	113.752	76.793	55.0446	39.5021	48.8591
T_29896_c0_g1	gi|920711759|gb|KOM53008.1| hypothetical protein LR48_Vigan09g166700 [Vigna angularis] 1.8e-25	GO:0016021, integral component of membrane	-	20.8376	27.232	16.567	5.97867	8.16829	5.61235	9.80748	6.85241	11.285	8.02125	42.9062	18.0401	10.1127	13.898	32.9523	13.6301	13.9838	29.1698
T_30212_c0_g1	gi|356525533|ref|XP_003531379.1| PREDICTED: stress enhanced protein 2, chloroplastic-like [Glycine max] 2.0e-96	GO:0009523, photosystem II;GO:0009535, chloroplast thylakoid membrane;GO:0009611, response to wounding;GO:0009765, photosynthesis, light harvesting;GO:0016021, integral component of membrane;GO:0016168, chlorophyll binding;GO:0071486, cellular response to high light intensity;GO:0071492, cellular response to UV-A	-	12.3176	11.1004	14.1412	4.55537	6.57305	3.80539	9.94875	13.3573	7.47504	15.9387	11.9399	10.1488	13.9716	33.1358	12.8779	30.2573	16.9894	17.1795
T_30457_c0_g1	gi|571498368|ref|XP_006594198.1| PREDICTED: dehydration-responsive element-binding protein 1D-like [Glycine max] 1.4e-78	GO:0003677, DNA binding;GO:0003700, DNA binding transcription factor activity;GO:0005634, nucleus;GO:0006351, transcription, DNA-templated	-	0.978231	0.99444	1.129	0	0.530315	0	2.78118	1.32333	1.22705	2.71562	5.04941	0.495822	1.03072	0.89254	0.534885	5.45546	8.15546	5.20292
T_30473_c0_g1	gi|593699837|ref|XP_007150357.1| hypothetical protein PHAVU_005G146900g [Phaseolus vulgaris] 2.2e-40	GO:0006351, transcription, DNA-templated;GO:0006511, ubiquitin-dependent protein catabolic process;GO:0030891, VCB complex;GO:0032968, positive regulation of transcription elongation from RNA polymerase II promoter;GO:0070449, elongin complex	K03872-ko04120 Ubiquitin mediated proteolysis;ko04066 HIF-1 signaling pathway	96.241	62.5014	58.049	39.0247	43.8112	51.3923	42.0753	46.0756	27.1028	36.0011	38.7781	26.9142	32.9954	33.5426	28.5769	44.3902	49.5571	65.2283
T_30735_c0_g2	-	-	-	3.78317	8.5388	7.00305	0.264626	0.602953	1.68501	1.01585	0.187653	5.32175	2.92725	1.2628	1.82101	6.60691	3.11523	4.00534	4.60501	9.48419	14.3426
T_30802_c0_g1	-	-	-	15.4091	7.93873	4.50238	2.08593	2.04376	10.5973	10.9032	8.54157	2.68545	2.76814	5.86801	5.30179	5.71207	1.73342	5.6937	0.802042	2.26963	1.63893
T_30868_c0_g1	gi|734415724|gb|KHN37811.1| hypothetical protein glysoja_016935 [Glycine soja] 5.7e-14	-	-	34.4798	22.9885	16.6903	7.512	14.118	4.92432	6.62695	7.10987	2.87317	2.45041	5.57621	9.06334	4.41825	2.07886	2.86349	4.2236	3.51687	8.32446
T_31247_c0_g1	gi|356552500|ref|XP_003544605.1| PREDICTED: uncharacterized protein LOC100814735 [Glycine max] 5.6e-71	-	-	13.5121	22.8865	16.7378	15.4583	24.7996	9.74924	26.7693	35.0952	23.6492	47.0634	37.5815	23.6168	33.0377	51.5132	47.3822	42.3003	27.8285	29.0932
T_31250_c0_g1	gi|947089477|gb|KRH38142.1| hypothetical protein GLYMA_09G113900 [Glycine max] 7.4e-40	-	-	18.1065	4.19643	2.96777	1.36151	2.81792	0.344261	2.17444	3.67128	1.91113	1.09032	1.41903	1.27961	1.10653	2.18369	3.35392	3.43503	2.29735	3.29874
T_31251_c0_g1	gi|356531070|ref|XP_003534101.1| PREDICTED: 21 kDa seed protein-like [Glycine max] 2.2e-106	GO:0004866, endopeptidase inhibitor activity;GO:0016021, integral component of membrane	-	19.5036	19.8955	23.2044	2.66284	3.13479	2.06844	6.05001	4.00055	3.88023	3.77051	7.09787	14.941	6.34313	4.86384	4.52428	13.9152	14.4727	8.56789
T_31270_c0_g1	gi|358248386|ref|NP_001239873.1| uncharacterized protein LOC100794670 [Glycine max] 7.2e-132	GO:0005789, endoplasmic reticulum membrane;GO:0005886, plasma membrane;GO:0016021, integral component of membrane;GO:0016032, viral process;GO:0046907, intracellular transport	-	14.7409	11.1024	6.94447	3.94541	6.54199	10.1431	6.48551	5.79868	4.75553	3.88212	4.57972	5.13168	4.53034	3.09127	3.08182	3.2965	6.07099	8.4334
T_31290_c0_g1	gi|356519950|ref|XP_003528631.1| PREDICTED: RING-H2 finger protein ATL2-like [Glycine max] 2.2e-86	GO:0006952, defense response;GO:0008270, zinc ion binding;GO:0010200, response to chitin;GO:0016021, integral component of membrane;GO:0016567, protein ubiquitination	-	3.99973	7.98387	28.4056	1.28013	1.81237	0.961217	8.29605	6.36812	2.09297	4.94374	7.83866	3.19257	4.87991	4.07751	4.13608	23.1142	14.7818	11.0286
T_31325_c0_g1	gi|947057266|gb|KRH06672.1| hypothetical protein GLYMA_16G038600 [Glycine max] 5.4e-72	GO:0005886, plasma membrane;GO:0006952, defense response;GO:0016021, integral component of membrane	-	11.3836	6.32505	5.19447	1.17045	1.54234	2.44758	2.47082	0.563165	0.367902	1.07474	1.05369	0.886865	1.43574	0.537125	1.1167	0.446696	0.942454	2.64119
T_31479_c0_g1	-	-	-	3.29704	4.35065	12.8037	17.589	20.4122	20.4426	8.36492	7.05534	58.2759	20.0247	7.43741	5.87392	26.8068	18.9603	15.0737	10.9802	33.6183	23.8554
T_31632_c0_g1	gi|734380978|gb|KHN23044.1| hypothetical protein glysoja_042060 [Glycine soja] 1.1e-23	-	-	4.8818	3.93341	2.20949	3.51437	8.86451	7.77255	8.1463	8.45279	6.52467	5.71487	4.74896	6.20876	12.7369	4.85469	7.76204	1.98797	6.90158	10.6672
T_31670_c0_g1	gi|734350404|gb|KHN12351.1| hypothetical protein glysoja_018481 [Glycine soja] 2.5e-23	GO:0004871, signal transducer activity;GO:0005622, intracellular;GO:0009506, plasmodesma;GO:0019722, calcium-mediated signaling	-	11.805	5.40931	4.72934	1.75681	6.04497	5.99722	3.12164	1.79507	1.54183	2.71953	1.31709	1.60721	3.25519	0.808214	3.00968	1.23423	6.43988	7.04073
T_31707_c0_g1	gi|947130099|gb|KRH77953.1| hypothetical protein GLYMA_01G244000 [Glycine max] 3.7e-14	GO:0016021, integral component of membrane	-	0.354568	1.58437	1.62204	2.5585	2.06505	0	2.07106	2.56796	1.94216	5.41752	3.37518	0.609808	3.84835	7.43827	1.07728	12.1335	4.03395	6.87125
T_31810_c0_g1	gi|734427384|gb|KHN44159.1| Late embryogenesis abundant protein 2 [Glycine soja] 8.7e-26	-	-	17.6846	30.1424	14.1881	1.3843	0.503894	0.186344	0.18483	0	0	1.73545	10.0567	32.8822	0.469825	0.0955738	0	0	0.735188	4.14985
T_31841_c0_g1	gi|734375940|gb|KHN21178.1| Momilactone A synthase [Glycine soja] 4.8e-133	GO:0010301, xanthoxin dehydrogenase activity;GO:0016491, oxidoreductase activity	-	25.9544	24.0593	19.4965	35.4633	33.4184	33.523	50.2771	48.6902	27.4168	39.2892	34.5772	31.0921	31.3989	36.6654	79.053	30.1939	16.8847	24.1762
T_31843_c0_g1	gi|571451972|ref|XP_006578901.1| PREDICTED: protein IQ-DOMAIN 1-like isoform X1 [Glycine max] 2.8e-168	GO:0005634, nucleus	-	2.98592	4.07587	4.99254	5.32296	3.95231	4.25454	9.30404	4.7507	4.73536	4.72096	8.70901	5.62046	7.07139	8.48418	9.39417	8.25334	5.33319	9.50714
T_31872_c0_g2	gi|734307856|gb|KHM99188.1| F-box/LRR-repeat protein 4 [Glycine soja] 2.1e-157	GO:0000142, cellular bud neck contractile ring;GO:0000209, protein polyubiquitination;GO:0000751, mitotic cell cycle G1 arrest in response to pheromone;GO:0004842, ubiquitin-protein transferase activity;GO:0005634, nucleus;GO:0006974, cellular response to DNA damage stimulus;GO:0019005, SCF ubiquitin ligase complex;GO:0030437, ascospore formation;GO:0031146, SCF-dependent proteasomal ubiquitin-de…	-	18.9569	23.2898	20.9291	31.0301	30.5046	28.2421	33.8228	35.8527	34.4438	43.8127	44.7638	38.2069	38.4962	55.1092	52.1368	32.6036	19.7084	18.6081
T_32037_c0_g1	gi|965657813|dbj|BAT74232.1| hypothetical protein VIGAN_01185400, partial [Vigna angularis var. angularis] 7.2e-10	-	-	2.59808	7.44738	10.5803	1.13388	7.94174	3.20028	22.6593	13.3427	11.0604	15.0062	17.195	5.17305	8.09753	7.52072	10.6996	36.2821	33.9263	30.4714
T_32101_c0_g1	gi|955327334|ref|XP_006582354.2| PREDICTED: uncharacterized protein LOC102670552 [Glycine max] 1.7e-53	-	-	13.289	5.83602	7.28318	2.96742	3.93482	6.03809	1.93589	2.17723	3.01424	1.24051	1.56991	2.67508	3.93739	1.72979	2.36617	1.57897	3.19273	2.94967
T_32145_c0_g1	gi|947098170|gb|KRH46755.1| hypothetical protein GLYMA_08G354800 [Glycine max] 7.4e-187	GO:0005774, vacuolar membrane;GO:0006810, transport;GO:0016021, integral component of membrane	-	9.13455	7.31475	7.75447	1.97639	3.19181	3.08532	3.50024	4.95966	2.30596	3.11174	3.4233	2.15984	3.07632	2.19611	3.12776	4.93436	5.45517	9.92909
T_32460_c0_g1	gi|920715507|gb|KOM55595.1| hypothetical protein LR48_Vigan10g148700 [Vigna angularis] 3.7e-13	-	-	26.3872	33.9998	28.9941	45.8866	63.8705	115.491	21.8154	26.7889	114.02	41.4934	31.8375	64.7261	84.2217	51.8719	37.3982	15.0052	29.7797	40.82
T_32508_c0_g1	gi|571440832|ref|XP_006575269.1| PREDICTED: uncharacterized protein LOC102668122 [Glycine max] 3.9e-72	-	-	7.80291	3.27678	6.50157	10.5416	11.5044	10.5459	4.94699	9.10975	8.25396	16.1865	2.84163	1.89676	15.1865	12.643	2.28669	17.901	14.7228	11.6498
T_32584_c0_g1	gi|571446424|ref|XP_006577091.1| PREDICTED: uncharacterized protein LOC100788969 isoform X1 [Glycine max] 4.0e-43	-	-	3.85954	5.25864	5.46576	6.10317	8.9156	14.5595	4.03263	4.06448	12.803	5.71659	5.47088	10.1473	10.5412	4.24753	7.16594	3.67096	4.89179	4.41725
T_32593_c0_g1	gi|351723539|ref|NP_001238562.1| 18 kDa seed maturation protein [Glycine max] 1.0e-57	GO:0009790, embryo development	-	1.12922	9.23733	5.68385	0.253735	0	0	0	0	0	0	3.82835	13.8087	0	0	0	0	0.120187	0.166728
T_32599_c0_g1	gi|356520493|ref|XP_003528896.1| PREDICTED: gibberellin 20 oxidase 2-like [Glycine max] 2.9e-214	GO:0005506, iron ion binding;GO:0009416, response to light stimulus;GO:0009639, response to red or far red light;GO:0009686, gibberellin biosynthetic process;GO:0009739, response to gibberellin;GO:0009740, gibberellic acid mediated signaling pathway;GO:0009826, unidimensional cell growth;GO:0009908, flower development;GO:0045544, gibberellin 20-oxidase activity;GO:0080167, response to karrikin	K05282-ko00904 Diterpenoid biosynthesis	8.04828	5.7069	9.32804	5.04781	6.01469	3.46786	2.95965	3.11275	2.50078	2.92075	4.16971	3.398	0.795395	0.280041	0.992427	0.958992	0.484121	1.45819
T_32614_c0_g1	gi|571467746|ref|XP_006584029.1| PREDICTED: putative F-box protein At1g67623 [Glycine max] 6.2e-105	-	-	2.27307	3.31066	2.92549	1.47686	0.845975	0.0525143	3.9257	3.11688	0.59356	2.73976	4.9443	0.278572	1.52554	0.91174	1.06719	11.6204	5.42933	4.65695
T_32734_c0_g1	gi|356504340|ref|XP_003520954.1| PREDICTED: peroxidase 44-like [Glycine max] 1.1e-116	GO:0004601, peroxidase activity;GO:0005576, extracellular region;GO:0006979, response to oxidative stress;GO:0009505, plant-type cell wall;GO:0009664, plant-type cell wall organization;GO:0020037, heme binding;GO:0042744, hydrogen peroxide catabolic process;GO:0046872, metal ion binding	K00430-ko00940 Phenylpropanoid biosynthesis	11.7533	22.3793	34.1372	27.1506	54.2216	65.3809	30.0112	24.923	37.373	38.3872	22.8348	18.6846	30.5339	21.8039	29.323	29.6819	34.6885	24.1042
T_32758_c0_g1	gi|593789364|ref|XP_007157721.1| hypothetical protein PHAVU_002G092800g [Phaseolus vulgaris] 3.0e-87	GO:0005886, plasma membrane	-	7.91511	16.6765	15.0149	36.9861	40.6335	24.7889	29.5413	41.497	33.7721	58.8211	27.2799	16.7319	40.9456	84.231	22.3229	50.3849	30.7093	23.199
T_32761_c0_g1	gi|734364874|gb|KHN17367.1| hypothetical protein glysoja_034778 [Glycine soja] 1.4e-42	-	-	0.256317	0.581239	2.03981	1.40323	1.94598	0.993591	3.10744	4.97498	2.76625	6.2958	2.03376	0.717601	2.21242	7.20871	2.37885	7.6362	6.84304	5.14786
T_32765_c0_g1	gi|734316846|gb|KHN02328.1| hypothetical protein glysoja_002352 [Glycine soja] 8.6e-37	-	-	143.57	51.8568	42.7676	16.9598	19.6872	32.8804	25.6615	27.3155	12.1378	10.8729	14.9443	21.4839	21.857	12.7675	13.0756	15.1795	19.886	30.2348
T_32912_c0_g1	gi|734413236|gb|KHN36681.1| hypothetical protein glysoja_001412 [Glycine soja] 9.6e-24	-	-	7.55801	8.23327	3.49316	0.175545	1.97764	3.95101	0.350549	1.66667	2.39827	0.652143	1.57637	4.37615	1.84242	0.859687	3.29688	1.89677	2.64538	2.04733
T_32931_c0_g1	gi|947075649|gb|KRH24489.1| hypothetical protein GLYMA_12G044400 [Glycine max] 2.0e-53	-	-	11.976	5.82277	5.53666	5.34014	11.3418	7.62976	7.52787	7.25863	5.55285	7.73626	16.8968	3.52525	8.13658	7.32128	27.4431	23.3597	7.8858	21.4963
T_32945_c0_g1	gi|571553242|ref|XP_003554835.2| PREDICTED: uncharacterized protein LOC100786487 [Glycine max] 3.9e-64	-	-	5.63048	12.8218	21.679	0.137647	4.14047	0.66889	15.5598	7.45516	2.80677	7.73741	15.0001	2.58887	6.03364	3.24598	8.83236	42.2337	38.2063	38.1247
T_32961_c0_g1	gi|374911398|gb|AFA25738.1| hypothetical protein [Phaseolus vulgaris] 5.3e-32	GO:0003712, transcription cofactor activity;GO:0005634, nucleus;GO:0005737, cytoplasm;GO:0005773, vacuole;GO:0005886, plasma membrane;GO:0006623, protein targeting to vacuole;GO:0009744, response to sucrose;GO:0009908, flower development;GO:0009910, negative regulation of flower development;GO:0030154, cell differentiation;GO:0031982, vesicle;GO:0090344, negative regulation of cell aging	-	43.3402	27.8791	26.5731	1.92115	60.4364	61.772	37.3473	2.68091	7.01163	45.9065	25.6415	14.0756	105.509	11.54	90.9754	138.469	89.0565	65.4584
T_32965_c1_g1	gi|351724385|ref|NP_001235776.1| uncharacterized protein LOC100527161 [Glycine max] 1.0e-45	-	-	3.28442	6.80412	7.07048	22.8076	23.6621	11.6234	33.124	35.1943	23.1638	76.347	32.2402	8.55833	38.932	73.5048	24.9948	85.1584	39.4502	30.9387
T_32995_c0_g1	gi|571436570|ref|XP_006573803.1| PREDICTED: uncharacterized protein LOC102670341 [Glycine max] 6.2e-51	-	-	4.13594	7.73196	19.847	0.291471	1.77625	0.826031	13.5402	5.66818	11.2787	8.35474	15.8596	3.65295	5.14754	4.88424	6.00085	23.5974	28.3046	29.9793
T_33091_c0_g1	gi|356562771|ref|XP_003549642.1| PREDICTED: uncharacterized protein LOC100500585 [Glycine max] 7.5e-32	-	-	4.44629	5.00604	5.39606	12.7713	12.6032	5.81712	13.7097	16.0914	10.6236	27.6675	9.40297	2.18033	28.6628	32.6963	5.45479	56.9689	35.3153	40.4038
T_33200_c0_g1	gi|571491267|ref|XP_006591861.1| PREDICTED: uncharacterized protein LOC100783345 isoform X1 [Glycine max] 2.4e-100	GO:0003677, DNA binding;GO:0003700, DNA binding transcription factor activity;GO:0005634, nucleus;GO:0006351, transcription, DNA-templated;GO:0009908, flower development;GO:0010228, vegetative to reproductive phase transition of meristem;GO:0040008, regulation of growth;GO:0048364, root development	-	68.8913	28.8902	22.0614	4.72394	10.7916	16.4715	14.0681	12.6354	4.80261	6.84478	11.8558	8.81443	12.249	6.61416	14.6981	10.6061	15.1326	23.2507
T_33370_c0_g1	gi|920707204|gb|KOM49201.1| hypothetical protein LR48_Vigan08g002800 [Vigna angularis] 5.3e-51	GO:0009405, pathogenesis;GO:0045735, nutrient reservoir activity	-	3.36963	13.6069	15.1211	4.42156	1.54647	1.22359	0	0.536395	0	0.379826	7.01467	20.1641	0	0	0.0907453	0.321329	0	0
T_33392_c0_g1	gi|351725497|ref|NP_001235047.1| CASP-like protein 2D1 [Glycine max] 1.1e-37	GO:0005886, plasma membrane;GO:0016021, integral component of membrane	-	33.1414	27.9218	29.7699	9.20904	11.361	17.6226	12.9009	14.6508	8.60163	13.918	17.4619	23.6263	10.1312	11.1093	14.0797	13.8611	21.2992	25.3111
T_33427_c0_g2	gi|351724497|ref|NP_001235268.1| uncharacterized protein LOC100499733 [Glycine max] 8.8e-64	-	-	9.42323	10.4113	11.3342	10.5351	10.2804	6.71058	11.6277	13.7094	15.3065	12.7669	6.97454	10.7654	20.0591	33.8385	15.1242	17.2085	9.42383	8.01174
T_33568_c0_g2	gi|593798118|ref|XP_007162097.1| hypothetical protein PHAVU_001G123700g [Phaseolus vulgaris] 2.8e-41	GO:0016021, integral component of membrane	-	31.6705	9.6042	8.27158	2.74284	2.53287	5.46635	3.67568	2.28118	2.89962	3.33014	2.0097	4.28368	3.09172	3.4027	2.34287	0.889432	3.50992	10.1211
T_33599_c0_g1	gi|571451308|ref|XP_006578696.1| PREDICTED: uncharacterized protein LOC102664115 [Glycine max] 1.1e-75	-	-	8.95533	7.94549	4.52706	2.67268	0.60113	1.23168	2.82994	3.19368	1.04486	2.12007	6.52653	11.1769	1.73512	3.70717	3.65341	2.52548	1.48543	2.16269
T_33601_c0_g1	gi|590577027|ref|XP_007013120.1| Iron-sulfur cluster biosynthesis family protein isoform 3 [Theobroma cacao] 8.5e-19	GO:0005198, structural molecule activity;GO:0005759, mitochondrial matrix;GO:0006790, sulfur compound metabolic process;GO:0008198, ferrous iron binding;GO:0016226, iron-sulfur cluster assembly;GO:0051537, 2 iron, 2 sulfur cluster binding;GO:0051539, 4 iron, 4 sulfur cluster binding;GO:0097428, protein maturation by iron-sulfur cluster transfer	-	21.0178	15.7547	12.4753	6.85605	11.522	8.99997	8.14078	9.46528	6.25138	8.6182	6.78398	5.24942	8.41666	5.30511	4.10462	7.4653	12.6412	11.4921
T_33605_c0_g1	gi|955316069|ref|XP_014630107.1| PREDICTED: high mobility group B protein 10-like isoform X1 [Glycine max] 1.3e-172	GO:0003677, DNA binding;GO:0003700, DNA binding transcription factor activity;GO:0005634, nucleus;GO:0006351, transcription, DNA-templated	-	7.8494	4.6122	3.79597	2.09316	3.17188	3.17872	2.69118	3.96665	1.96616	3.23105	2.61972	2.13753	1.47949	2.02536	2.13327	3.30692	3.08297	4.53422
T_33631_c0_g1	gi|356564708|ref|XP_003550591.1| PREDICTED: putative invertase inhibitor [Glycine max] 2.6e-89	GO:0004857, enzyme inhibitor activity;GO:0005576, extracellular region;GO:0030599, pectinesterase activity;GO:0046910, pectinesterase inhibitor activity;GO:0071944, cell periphery	-	2.86715	2.98794	2.01009	3.64951	7.84871	10.2566	2.05418	1.11326	6.90802	3.61685	2.89905	3.0749	4.06693	3.19756	3.33061	1.80059	3.51322	3.10959
T_33688_c0_g1	gi|920697883|gb|KOM41108.1| hypothetical protein LR48_Vigan04g130600 [Vigna angularis] 5.3e-47	GO:0000815, ESCRT III complex;GO:0005622, intracellular;GO:0005770, late endosome;GO:0005829, cytosol;GO:0005886, plasma membrane;GO:0007034, vacuolar transport;GO:0015031, protein transport;GO:0070676, intralumenal vesicle formation	K12195-ko04144 Endocytosis	42.0418	18.5647	11.2823	8.65542	8.03847	13.7479	8.50435	10.7545	7.90533	5.2181	7.73592	6.40557	8.20806	5.95307	6.84696	10.1511	10.0004	16.5255
T_33695_c0_g1	gi|356527005|ref|XP_003532105.1| PREDICTED: HVA22-like protein f [Glycine max] 1.8e-72	GO:0016021, integral component of membrane	-	19.7288	8.61116	10.8541	3.61495	3.84936	7.23905	4.32582	2.20212	2.4567	1.84566	3.401	3.9993	4.67994	1.81035	2.75506	2.83907	2.89399	7.30882
T_33768_c0_g1	gi|734337637|gb|KHN08574.1| hypothetical protein glysoja_014339 [Glycine soja] 1.6e-20	-	-	5.07091	7.22231	5.40136	2.22721	4.52233	1.91331	20.4418	20.9031	5.84217	17.2646	17.3723	4.25369	13.3663	14.1281	11.1127	35.4094	29.2585	24.4552
T_33805_c0_g1	gi|947041713|gb|KRG91437.1| hypothetical protein GLYMA_20G155100 [Glycine max] 2.9e-86	GO:0003677, DNA binding;GO:0003700, DNA binding transcription factor activity;GO:0005634, nucleus;GO:0006351, transcription, DNA-templated;GO:0009738, abscisic acid-activated signaling pathway	-	8.73218	22.2466	63.6926	0.0941841	0.613662	0.572846	24.9439	11.8512	4.70684	10.6037	26.6139	4.28425	8.43426	5.99702	10.3038	109.712	94.2769	50.852
T_33825_c0_g1	gi|947128263|gb|KRH76117.1| hypothetical protein GLYMA_01G132500 [Glycine max] 2.0e-35	GO:0006869, lipid transport;GO:0008289, lipid binding	-	3.05731	2.55505	1.00459	0.473175	3.92794	3.53444	6.44613	4.10144	1.67082	2.66888	4.3173	10.2459	0.674638	3.33246	19.11	3.10424	5.61051	8.27511
T_33851_c0_g1	gi|947118589|gb|KRH66838.1| hypothetical protein GLYMA_03G131900 [Glycine max] 5.8e-49	GO:0005737, cytoplasm;GO:0009414, response to water deprivation;GO:0009617, response to bacterium;GO:0009644, response to high light intensity	-	192.082	115.504	104.099	51.3446	66.028	66.7781	64.0006	68.9881	54.4896	46.4885	72.1751	55.3355	59.8056	48.5547	56.875	80.7148	109.499	114.252
T_33860_c0_g1	gi|734352831|gb|KHN13244.1| hypothetical protein glysoja_016421 [Glycine soja] 2.8e-61	GO:0016021, integral component of membrane	-	19.4711	23.4921	48.1726	4.29994	11.1672	6.18724	27.9618	18.6404	21.4646	18.792	18.7826	5.64527	21.0888	25.1105	18.7108	106.965	62.3249	73.6222
T_33862_c0_g1	gi|950942917|ref|XP_014493702.1| PREDICTED: sufE-like protein 2, chloroplastic [Vigna radiata var. radiata] 1.2e-72	GO:0008047, enzyme activator activity;GO:0009507, chloroplast;GO:0016226, iron-sulfur cluster assembly;GO:0051176, positive regulation of sulfur metabolic process	-	4.37353	3.64296	3.04025	7.30498	5.67135	3.72754	5.76658	7.74937	10.7018	13.1159	13.8735	4.27537	17.2245	15.4989	20.931	12.0355	9.93481	11.3246
T_33913_c0_g1	gi|593781395|ref|XP_007153738.1| hypothetical protein PHAVU_003G060900g [Phaseolus vulgaris] 1.5e-34	GO:0016021, integral component of membrane	-	19.1349	9.35731	12.096	4.71124	5.73416	9.34799	4.68678	3.64664	5.58231	3.483	4.58775	7.44706	7.08186	2.8701	6.3078	4.63831	6.06026	7.29649
T_33945_c0_g1	gi|947109670|gb|KRH57996.1| hypothetical protein GLYMA_05G099300 [Glycine max] 9.2e-57	-	-	1.7841	3.74468	1.61688	1.18765	0.896548	0.128173	1.89557	0.727939	2.04208	2.74617	2.82972	1.70098	1.54368	5.30807	0.680639	14.8315	5.5726	5.41519
T_34047_c0_g1	gi|356573972|ref|XP_003555128.1| PREDICTED: uncharacterized protein DDB_G0275933 isoform X1 [Glycine max] 1.5e-06	-	-	20.9427	7.529	7.8737	3.79501	7.35337	6.19822	5.22316	5.69945	2.58849	3.05446	4.72946	5.91721	2.52233	3.93238	4.1096	4.72021	5.17134	8.27196
T_34078_c0_g1	gi|965656308|dbj|BAT72727.1| hypothetical protein VIGAN_01016000 [Vigna angularis var. angularis] 5.0e-12	-	-	6.70775	9.4399	9.20838	1.26844	2.20632	1.22361	8.32256	6.87579	8.80013	6.83998	16.3663	6.66251	6.07595	6.7455	8.2556	16.5305	18.3741	26.7302
T_34111_c0_g1	gi|356536889|ref|XP_003536965.1| PREDICTED: exocyst complex component EXO70A1-like [Glycine max] 5.2e-285	GO:0000145, exocyst;GO:0005576, extracellular region;GO:0005618, cell wall;GO:0005829, cytosol;GO:0005856, cytoskeleton;GO:0005886, plasma membrane;GO:0006887, exocytosis;GO:0009524, phragmoplast	-	0.0429936	0.203394	0.460847	1.1318	0.914582	0.355073	3.24539	1.79964	1.4794	6.28675	2.3321	0.626627	2.331	2.80605	1.08383	22.9211	9.41863	3.0016
T_34135_c0_g1	-	-	-	3.38817	2.29816	3.20965	3.596	2.93906	3.05432	4.10282	7.26679	3.94722	6.87497	3.49766	3.09133	5.65503	7.80036	5.4738	8.11462	2.89917	5.12008
T_34142_c0_g1	gi|593267108|ref|XP_007135732.1| hypothetical protein PHAVU_010G153700g [Phaseolus vulgaris] 4.0e-67	GO:0008270, zinc ion binding	-	37.6762	35.5033	25.3923	25.0474	26.6435	27.5458	21.3917	24.368	13.0655	14.795	13.5768	28.5498	16.5272	12.7839	16.637	11.9626	17.9047	21.8081
T_34178_c0_g1	gi|356518195|ref|XP_003527767.1| PREDICTED: ethylene-responsive transcription factor TINY [Glycine max] 9.3e-97	GO:0001944, vasculature development;GO:0002213, defense response to insect;GO:0003677, DNA binding;GO:0003700, DNA binding transcription factor activity;GO:0005634, nucleus;GO:0006351, transcription, DNA-templated;GO:0009611, response to wounding;GO:0009873, ethylene-activated signaling pathway;GO:0051301, cell division	-	0.171254	0.557051	1.92238	0.0409998	0.178002	0	4.7251	0.753499	1.05885	2.07647	3.78093	0.205603	0.398539	0.305082	1.14294	27.2438	11.5623	7.64791
T_34198_c0_g1	gi|571491263|ref|XP_006591859.1| PREDICTED: uncharacterized protein LOC100779923 isoform X1 [Glycine max] 9.1e-18	-	-	35.4203	16.0744	15.8288	8.01949	11.493	12.0273	6.79703	13.0031	7.26174	8.76279	8.24531	5.32155	8.21382	8.54386	6.78144	8.9355	8.95308	12.9753
T_34235_c0_g1	gi|356519072|ref|XP_003528198.1| PREDICTED: probable calcium-binding protein CML41 [Glycine max] 3.4e-88	GO:0005509, calcium ion binding	-	3.30407	2.43447	3.4709	1.41741	2.36246	2.01013	3.66841	3.59105	3.09775	3.5226	2.29954	1.43826	4.45519	10.5036	2.28197	12.4031	6.43828	5.49315
T_34247_c0_g1	gi|1012340834|gb|KYP52045.1| 50S ribosomal protein L7/L12 [Cajanus cajan] 1.9e-91	GO:0003735, structural constituent of ribosome;GO:0005840, ribosome;GO:0006412, translation	K02935-ko03010 Ribosome	20.1019	15.4631	15.2208	6.6441	17.3369	17.8423	11.7087	12.8067	7.05846	8.01215	8.04544	8.60665	9.50095	5.80282	5.41259	10.5685	8.42958	13.9178
T_34279_c0_g1	gi|356554941|ref|XP_003545799.1| PREDICTED: uncharacterized protein At1g08160 [Glycine max] 4.8e-92	GO:0016021, integral component of membrane	-	27.7936	23.3993	19.3079	9.04032	12.9955	24.5732	9.55329	6.94821	12.1457	8.75073	8.27542	17.069	16.0554	8.23835	13.0828	7.24444	14.5993	19.125
T_34360_c0_g1	gi|1012326903|gb|KYP38663.1| hypothetical protein KK1_040077 [Cajanus cajan] 7.8e-33	-	-	15.6285	7.85943	6.87292	1.17079	4.73443	5.56671	3.99182	8.95438	3.03296	3.37909	2.03642	3.84041	4.67965	5.13772	3.61308	6.3454	4.93885	7.62151
T_34379_c0_g1	gi|947070674|gb|KRH19565.1| hypothetical protein GLYMA_13G124100 [Glycine max] 4.9e-60	GO:0006457, protein folding;GO:0016272, prefoldin complex	-	36.6566	22.0695	16.3577	11.6906	14.3154	15.1343	12.4255	13.3899	9.40468	8.20484	11.1645	10.3954	10.4585	9.1157	7.94471	7.69963	12.7203	19.3086
T_34460_c0_g1	gi|965668647|dbj|BAT83254.1| hypothetical protein VIGAN_04037800 [Vigna angularis var. angularis] 3.9e-16	GO:0016021, integral component of membrane	-	50.0923	59.7793	69.8642	215.445	237.253	198.84	99.8428	84.4089	150.888	165.136	110.137	118.816	146.244	98.2385	152.798	72.7271	79.4751	62.7285
T_34507_c0_g1	gi|1012353829|gb|KYP65017.1| putative non-specific lipid-transfer protein AKCS9 [Cajanus cajan] 1.6e-30	GO:0006810, transport;GO:0008289, lipid binding	-	251.215	220.621	264.69	92.4898	256.214	249.718	118.069	62.9819	40.7551	79.3728	126.527	107.014	155.667	46.8199	142.346	69.9938	131.444	176.064
T_34513_c0_g1	gi|920689608|gb|KOM33591.1| hypothetical protein LR48_Vigan01g314700 [Vigna angularis] 3.7e-66	GO:0016021, integral component of membrane	-	25.696	16.016	18.946	5.5752	9.19766	13.3196	7.63001	3.16164	5.94743	4.01577	3.73804	9.91135	9.60244	3.13832	5.94199	4.08091	9.55965	12.6581
T_34576_c0_g1	gi|571516352|ref|XP_003545750.2| PREDICTED: uncharacterized protein PGYRP7 [Glycine max] 9.1e-14	GO:0016021, integral component of membrane	-	59.5129	40.9173	38.2816	18.7676	18.2601	18.2268	30.0516	28.1795	23.1464	23.4243	33.8815	24.0644	28.5099	26.4828	33.7104	29.1943	38.7763	53.9588
T_34594_c0_g1	gi|734355031|gb|KHN13916.1| hypothetical protein glysoja_016200 [Glycine soja] 1.8e-49	GO:0016021, integral component of membrane	-	1.25693	2.09927	1.67667	0.347365	1.61088	0.187678	4.24098	4.46161	0.915854	3.05997	5.61263	1.90752	3.19304	2.77755	3.47949	12.9791	4.41436	7.94498
T_34596_c0_g1	gi|1012324186|gb|KYP36216.1| Albumin-1, partial [Cajanus cajan] 2.3e-46	GO:0009405, pathogenesis;GO:0045735, nutrient reservoir activity	-	4.99425	12.8405	13.7435	2.67719	11.0367	19.8579	7.66969	5.5935	3.70603	10.0608	12.5391	6.66107	5.30077	1.90179	2.51519	9.6221	6.40098	9.34885
T_34616_c0_g1	gi|571454279|ref|XP_006579742.1| PREDICTED: serine/threonine-protein kinase prpf4B [Glycine max] 5.1e-74	GO:0000166, nucleotide binding;GO:0003723, RNA binding;GO:0003729, mRNA binding;GO:0003730, mRNA 3'-UTR binding;GO:0005634, nucleus;GO:0005654, nucleoplasm;GO:0005737, cytoplasm;GO:0007369, gastrulation;GO:0009409, response to cold;GO:0009790, embryo development;GO:0016477, cell migration;GO:0019899, enzyme binding;GO:0022008, neurogenesis;GO:0045727, positive regulation of translation;GO:0048255…	-	17.3425	10.912	5.79567	3.88983	3.3316	7.80858	5.86639	6.60833	5.3559	3.77399	4.99105	3.22579	4.19243	3.86484	3.75905	3.61094	6.49526	6.22948
T_34644_c0_g1	gi|734337648|gb|KHN08585.1| F-box protein, partial [Glycine soja] 1.4e-23	-	-	9.86042	15.6731	12.0389	0.492416	2.88319	1.84808	7.10101	4.69644	3.02429	3.40498	8.54823	2.93939	2.90415	2.63341	2.05424	18.1092	15.4382	24.8082
T_34722_c0_g2	gi|593688019|ref|XP_007144644.1| hypothetical protein PHAVU_007G173000g [Phaseolus vulgaris] 1.5e-69	GO:0005634, nucleus;GO:0006351, transcription, DNA-templated;GO:0045892, negative regulation of transcription, DNA-templated	-	3.41754	5.89902	4.48142	6.23764	7.12284	14.6855	5.53994	3.12415	6.76068	5.09993	4.33633	9.21427	10.4401	5.05315	3.53462	2.50373	5.55186	4.4964
T_34727_c0_g1	gi|955309207|ref|XP_014626094.1| PREDICTED: uncharacterized protein LOC106796963 [Glycine max] 8.9e-49	GO:0005783, endoplasmic reticulum;GO:0006886, intracellular protein transport;GO:0016021, integral component of membrane	K14009-ko04141 Protein processing in endoplasmic reticulum	10.3901	5.41894	3.19899	0.835647	2.03878	4.2601	0.867346	1.30024	0.625628	1.2598	0.995413	1.79518	2.9879	1.03759	0.838305	0.281025	0.831317	2.85577
T_34728_c0_g1	gi|593785805|ref|XP_007155943.1| hypothetical protein PHAVU_003G245600g [Phaseolus vulgaris] 1.1e-35	GO:0016021, integral component of membrane;GO:0048364, root development	-	4.45265	9.15636	3.81919	2.24215	5.8999	13.6834	5.1958	2.07471	5.31907	2.28739	2.22756	6.16336	3.24511	1.40259	1.38766	0.436978	2.0892	1.93372
T_34739_c0_g2	gi|356507865|ref|XP_003522683.1| PREDICTED: uncharacterized protein LOC100798503 [Glycine max] 3.8e-50	-	-	2.52928	2.95286	1.09896	14.3028	13.1662	3.54602	10.7611	16.8138	8.31316	19.6957	8.69176	1.64721	11.9175	21.1555	7.10249	21.1532	7.63574	6.84804
T_34740_c0_g1	gi|593687149|ref|XP_007144234.1| hypothetical protein PHAVU_007G139200g [Phaseolus vulgaris] 1.3e-53	-	-	4.08641	5.25819	4.26927	10.2482	14.293	10.2196	9.10096	14.5741	11.4759	10.2834	9.98062	12.5194	7.50146	6.91181	12.1636	4.304	2.55797	2.27251
T_34818_c0_g1	gi|356513343|ref|XP_003525373.1| PREDICTED: PIN2/TERF1-interacting telomerase inhibitor 1-like [Glycine max] 5.7e-97	GO:0003676, nucleic acid binding	-	37.8635	25.0511	20.5463	11.2236	12.1754	22.4557	12.7915	13.0783	7.8055	7.92553	10.8065	8.66665	10.4856	6.92102	7.68661	7.83752	9.52202	10.561
T_34827_c0_g1	gi|947051036|gb|KRH00565.1| hypothetical protein GLYMA_18G220700 [Glycine max] 1.1e-195	GO:0005783, endoplasmic reticulum;GO:0016021, integral component of membrane;GO:0019901, protein kinase binding;GO:0030176, integral component of endoplasmic reticulum membrane;GO:0030968, endoplasmic reticulum unfolded protein response;GO:0031369, translation initiation factor binding;GO:0042149, cellular response to glucose starvation;GO:0051219, phosphoprotein binding;GO:0071456, cellular resp…	-	19.7847	19.9063	20.5267	13.8574	17.9032	18.181	14.1205	15.226	11.0337	11.4725	12.764	13.6866	9.67498	8.65414	9.75837	7.85598	10.2257	9.15061
T_34837_c0_g1	gi|351723053|ref|NP_001238033.1| uncharacterized protein LOC100500690 precursor [Glycine max] 7.5e-87	-	-	9.29312	9.12708	9.58029	8.18157	10.7639	10.1964	14.0321	19.4061	11.0218	37.0284	17.3254	13.427	23.2173	53.0653	13.2873	59.4337	35.7693	34.2114
T_34852_c0_g1	gi|351723261|ref|NP_001235993.1| uncharacterized protein LOC100500296 [Glycine max] 1.8e-86	GO:0000151, ubiquitin ligase complex;GO:0005737, cytoplasm;GO:0005829, cytosol;GO:0030674, protein binding, bridging;GO:0070647, protein modification by small protein conjugation or removal	-	13.8999	8.35304	6.99492	2.11343	3.37847	5.52266	3.98839	4.29587	2.22602	3.28025	3.31375	2.16405	3.86515	2.87446	4.02469	4.95066	2.98408	8.7145
T_34862_c0_g1	-	-	-	12.5175	16.1264	16.1931	8.81655	5.07531	5.34122	3.43132	3.63265	5.48888	4.71401	5.57009	18.1473	7.49517	4.42303	6.11354	3.14295	13.7846	8.82443
T_34931_c0_g1	gi|571542397|ref|XP_006601942.1| PREDICTED: probable E3 ubiquitin-protein ligase XERICO [Glycine max] 3.4e-57	GO:0000209, protein polyubiquitination;GO:0004842, ubiquitin-protein transferase activity;GO:0005634, nucleus;GO:0005737, cytoplasm;GO:0005886, plasma membrane;GO:0008270, zinc ion binding;GO:0009651, response to salt stress;GO:0009738, abscisic acid-activated signaling pathway;GO:0009789, positive regulation of abscisic acid-activated signaling pathway;GO:0016021, integral component of membrane;…	-	12.3939	10.0309	7.8208	1.95167	4.40118	3.95776	5.02103	3.91555	3.63442	3.10764	3.85674	3.03875	3.82172	1.61414	4.7313	4.27571	10.2948	12.3486
T_34974_c0_g1	gi|734408440|gb|KHN34768.1| hypothetical protein glysoja_032944 [Glycine soja] 1.7e-126	-	-	17.9784	12.3724	9.68149	3.56835	10.1153	16.535	4.79157	3.4407	4.49447	4.78749	3.52384	4.63885	7.75359	3.07693	2.76512	2.97261	9.11965	11.0716
T_34994_c0_g1	gi|734373598|gb|KHN20356.1| hypothetical protein glysoja_027853 [Glycine soja] 1.9e-49	-	-	19.8663	25.1492	29.8345	3.95441	17.0852	3.81699	44.4694	30.7618	31.0054	19.3274	68.4353	15.1942	10.0056	10.2585	14.9786	99.0798	42.2382	41.8792
T_35023_c0_g1	gi|356515957|ref|XP_003526663.1| PREDICTED: 2-oxoisovalerate dehydrogenase subunit alpha 2, mitochondrial-like [Glycine max] 1.2e-132	GO:0003863, 3-methyl-2-oxobutanoate dehydrogenase (2-methylpropanoyl-transferring) activity;GO:0005739, mitochondrion;GO:0005759, mitochondrial matrix;GO:0016624, oxidoreductase activity, acting on the aldehyde or oxo group of donors, disulfide as acceptor;GO:0046872, metal ion binding	K00166-ko00640 Propanoate metabolism;ko00280 Valine, leucine and isoleucine degradation	5.91526	4.05307	5.75931	1.40165	3.50579	0.804659	2.59025	4.66513	2.26319	3.30365	1.80412	2.72126	4.10355	2.16236	1.73334	3.9627	2.57016	1.82519
T_35025_c0_g1	gi|734404432|gb|KHN32943.1| hypothetical protein glysoja_009934 [Glycine soja] 1.9e-51	-	-	20.3657	37.4901	47.1264	8.36058	12.4368	6.69669	8.49649	14.8725	3.37194	13.6856	21.1247	26.1243	8.85341	12.9328	7.44354	13.6344	12.9607	18.9786
T_35095_c0_g1	gi|734374882|gb|KHN20791.1| hypothetical protein glysoja_037391 [Glycine soja] 4.8e-40	-	-	13.5915	6.03339	3.48456	3.3645	3.12038	3.22888	3.70211	5.3556	1.39834	2.76992	2.75375	6.3229	1.96828	1.82876	2.64016	5.32632	0.372675	6.68079
T_35140_c0_g1	gi|351727517|ref|NP_001238443.1| 2S albumin precursor [Glycine max] 1.3e-32	GO:0045735, nutrient reservoir activity	-	7.93254	16.7935	19.8359	2.33831	4.72905	6.77848	4.63322	1.60028	6.84131	1.87731	6.35075	13.0184	3.36925	1.43574	0.864382	1.96275	2.89694	4.61593
T_35168_c0_g1	gi|356535935|ref|XP_003536497.1| PREDICTED: alpha-L-fucosidase 1 [Glycine max] 3.4e-262	GO:0004560, alpha-L-fucosidase activity;GO:0005773, vacuole;GO:0005975, carbohydrate metabolic process;GO:0006004, fucose metabolic process;GO:0006516, glycoprotein catabolic process;GO:0048046, apoplast	K01206-ko00511 Other glycan degradation	10.4983	8.93708	12.0108	1.31312	5.11319	8.49443	5.50483	3.28156	3.35319	3.38604	4.71026	6.99339	6.02862	3.92544	4.37019	3.43627	5.89282	6.8515
T_35175_c0_g1	gi|571507744|ref|XP_006595899.1| PREDICTED: glycerol-3-phosphate acyltransferase 5-like [Glycine max] 8.9e-257	GO:0004366, glycerol-3-phosphate O-acyltransferase activity;GO:0010143, cutin biosynthetic process;GO:0010345, suberin biosynthetic process;GO:0016020, membrane;GO:0016021, integral component of membrane;GO:0016024, CDP-diacylglycerol biosynthetic process;GO:0016311, dephosphorylation;GO:0016791, phosphatase activity;GO:0090447, glycerol-3-phosphate 2-O-acyltransferase activity	K13508-ko00564 Glycerophospholipid metabolism;ko00561 Glycerolipid metabolism	11.8423	11.0748	7.00601	15.7312	20.8089	9.90496	14.5171	15.3587	32.5144	18.1078	24.4206	14.4872	14.9422	23.1082	18.2227	21.7398	9.52404	14.4385
T_35185_c0_g1	-	-	-	0.380806	0.711806	2.24927	5.09462	7.36809	12.8288	3.07966	1.37336	7.33812	5.64079	1.05139	2.10895	5.20405	5.25399	1.27171	1.75635	4.99098	5.08355
T_35206_c0_g1	gi|734400478|gb|KHN31482.1| hypothetical protein glysoja_035589 [Glycine soja] 5.3e-49	-	-	0.950241	2.43478	1.26233	7.24465	12.4511	3.53273	7.01731	9.54441	8.23142	23.2457	4.52296	4.76813	17.8981	42.1315	3.23207	26.9575	9.61973	9.93094
T_35214_c0_g1	gi|227121314|gb|ACP19347.1| phosphate transporter 3 [Glycine max] 2.6e-227	GO:0005886, plasma membrane;GO:0005887, integral component of plasma membrane;GO:0006817, phosphate ion transport;GO:0015114, phosphate ion transmembrane transporter activity;GO:0015293, symporter activity;GO:0015415, ATPase-coupled phosphate ion transmembrane transporter activity;GO:0016021, integral component of membrane;GO:0022857, transmembrane transporter activity;GO:1901684, arsenate ion tr…	-	3.01521	4.96622	6.15557	4.68186	3.85457	3.4618	5.82369	5.1635	10.7862	7.82778	11.3589	5.38414	11.5852	19.5949	7.45561	11.0396	7.07719	6.40201
T_35220_c1_g1	gi|593499484|ref|XP_007141987.1| hypothetical protein PHAVU_008G242900g [Phaseolus vulgaris] 2.0e-88	GO:0004871, signal transducer activity;GO:0005774, vacuolar membrane;GO:0005794, Golgi apparatus;GO:0005886, plasma membrane;GO:0009506, plasmodesma;GO:0009611, response to wounding;GO:0009617, response to bacterium;GO:0009751, response to salicylic acid;GO:0009816, defense response to bacterium, incompatible interaction;GO:0016021, integral component of membrane;GO:0042742, defense response to b…	-	3.5162	12.9396	8.28467	18.4454	20.4246	6.34431	43.5953	32.6667	20.7393	64.2128	40.4835	7.94403	23.1409	44.401	12.7317	147.443	56.9639	43.7392
T_35220_c1_g2	gi|356569943|ref|XP_003553153.1| PREDICTED: protein YLS9 [Glycine max] 6.7e-107	GO:0004871, signal transducer activity;GO:0005774, vacuolar membrane;GO:0005794, Golgi apparatus;GO:0005886, plasma membrane;GO:0009506, plasmodesma;GO:0009611, response to wounding;GO:0009617, response to bacterium;GO:0009751, response to salicylic acid;GO:0009816, defense response to bacterium, incompatible interaction;GO:0016021, integral component of membrane;GO:0042742, defense response to b…	-	8.83735	17.2066	13.805	22.565	28.4687	15.1105	41.5884	39.2166	19.1069	49.3475	28.3555	7.31087	24.2051	23.4211	34.4451	71.5096	33.1347	41.7376
T_35273_c0_g1	gi|920680384|gb|KOM27249.1| hypothetical protein LR48_Vigan406s005900 [Vigna angularis] 1.6e-112	GO:0000139, Golgi membrane;GO:0005484, SNAP receptor activity;GO:0005794, Golgi apparatus;GO:0005797, Golgi medial cisterna;GO:0005801, cis-Golgi network;GO:0006888, ER to Golgi vesicle-mediated transport;GO:0006906, vesicle fusion;GO:0015031, protein transport;GO:0016021, integral component of membrane;GO:0031201, SNARE complex;GO:0048209, regulation of vesicle targeting, to, from or within Golgi	K08495-ko04130 SNARE interactions in vesicular transport	35.747	18.2109	13.8375	10.4075	11.5381	11.4424	9.63218	14.8038	6.36739	6.33326	9.73427	5.81939	5.27441	5.13825	6.87462	14.3403	10.7807	14.7555
T_35306_c0_g1	gi|955314640|ref|XP_014629870.1| PREDICTED: (-)-isopiperitenol/(-)-carveol dehydrogenase, mitochondrial-like [Glycine max] 1.4e-131	GO:0000166, nucleotide binding;GO:0005739, mitochondrion;GO:0018458, isopiperitenol dehydrogenase activity;GO:0018459, carveol dehydrogenase activity;GO:0031525, menthol biosynthetic process	-	28.0422	39.3815	67.8914	9.5548	22.3629	12.3816	29.4877	17.8906	43.8763	18.7753	43.7934	28.7205	26.4478	21.7986	29.6658	43.945	62.7458	56.3998
T_35307_c0_g1	gi|571438138|ref|XP_006574490.1| PREDICTED: transcription factor bHLH92 [Glycine max] 1.3e-44	GO:0003677, DNA binding;GO:0003700, DNA binding transcription factor activity;GO:0005634, nucleus;GO:0006351, transcription, DNA-templated;GO:0006355, regulation of transcription, DNA-templated	-	1.31941	1.59919	1.9913	0	0.0851405	0.334612	3.67187	1.03562	2.23386	1.49825	2.67911	0.279516	0.238184	0.205359	1.74171	6.60893	5.84802	9.44427
T_35333_c0_g1	gi|356522898|ref|XP_003530079.1| PREDICTED: U-box domain-containing protein 21-like [Glycine max] 3.4e-208	GO:0004842, ubiquitin-protein transferase activity;GO:0010200, response to chitin;GO:0016874, ligase activity	-	2.7692	8.04395	12.2831	1.26533	8.86001	1.93205	47.691	20.6957	11.0725	33.7512	33.3001	3.88527	17.8247	13.4713	14.8278	122.739	70.8497	58.4861
T_35336_c0_g1	gi|356507656|ref|XP_003522580.1| PREDICTED: DNA ligase 1-like isoform X1 [Glycine max] 1.8e-93	GO:0003676, nucleic acid binding;GO:0003677, DNA binding;GO:0004523, RNA-DNA hybrid ribonuclease activity;GO:0046872, metal ion binding	-	11.1389	5.26078	2.89158	2.34974	1.31351	3.54442	2.95432	2.61736	1.31976	1.19343	2.0928	2.26853	1.87415	1.32163	1.79543	2.65771	2.731	4.85283
T_35379_c0_g1	gi|571514525|ref|XP_003545866.2| PREDICTED: SNF1-related protein kinase regulatory subunit gamma-like PV42a [Glycine max] 8.8e-111	GO:0003006, developmental process involved in reproduction;GO:0009553, embryo sac development;GO:0009555, pollen development;GO:0010183, pollen tube guidance;GO:0048443, stamen development	-	11.3725	13.5983	13.1263	0.172252	0.816226	1.37695	0.834838	0.282043	0.621487	0.725874	5.41285	6.68977	2.32517	1.02452	1.32452	0.768415	7.14758	7.45888
T_35492_c0_g1	gi|1012337685|gb|KYP48954.1| hypothetical protein KK1_029356 [Cajanus cajan] 1.3e-55	-	-	25.4817	10.8641	11.128	3.84715	7.06353	9.44342	4.615	3.22443	3.30269	2.68775	3.12038	6.4504	7.33388	2.99799	4.12367	4.38308	6.43215	8.62574
T_35496_c0_g1	gi|593793599|ref|XP_007159838.1| hypothetical protein PHAVU_002G271900g [Phaseolus vulgaris] 8.2e-20	-	-	24.1985	46.6163	45.8344	0.317324	1.13586	0.986947	1.78794	0.616052	0.360413	1.35648	6.11913	13.6112	0.683417	1.74159	1.19618	2.28976	10.1433	12.6208
T_35603_c0_g2	gi|356506224|ref|XP_003521887.1| PREDICTED: gibberellin 3-beta-dioxygenase 4-like [Glycine max] 4.5e-166	GO:0005506, iron ion binding;GO:0009416, response to light stimulus;GO:0009686, gibberellin biosynthetic process;GO:0009740, gibberellic acid mediated signaling pathway;GO:0016707, gibberellin 3-beta-dioxygenase activity;GO:0046872, metal ion binding;GO:0051213, dioxygenase activity	-	4.72086	4.10105	5.03529	6.21785	7.18994	4.79115	9.48603	7.62895	6.59039	5.04625	5.35019	7.87722	7.24855	9.77466	13.5251	0.944481	1.28258	2.81681
T_35620_c0_g1	gi|734336069|gb|KHN08148.1| Putative lipid-binding protein [Glycine soja] 7.6e-41	GO:0005618, cell wall;GO:0005783, endoplasmic reticulum;GO:0009506, plasmodesma;GO:0009626, plant-type hypersensitive response;GO:0009627, systemic acquired resistance;GO:0009631, cold acclimation;GO:0009682, induced systemic resistance;GO:0009707, chloroplast outer membrane;GO:0043621, protein self-association;GO:0048046, apoplast;GO:0050832, defense response to fungus;GO:0070417, cellular respo…	-	3.22139	11.3556	7.26474	4.34975	11.1608	14.1229	3.15677	1.32652	5.31087	1.24499	6.05792	17.2036	14.6914	7.17083	27.7322	1.56391	3.91476	4.2285
T_35636_c0_g1	gi|734416401|gb|KHN38280.1| hypothetical protein glysoja_003945 [Glycine soja] 3.4e-23	GO:0016021, integral component of membrane	-	14.0173	11.2629	6.66807	23.0262	16.2915	11.7887	31.9998	20.6889	18.6604	13.1522	31.4901	10.6573	20.1377	26.4044	36.4722	17.576	14.5122	25.7054
T_35662_c0_g1	gi|1012360045|gb|KYP71229.1| Mitogen-activated protein kinase kinase kinase ANP1 [Cajanus cajan] 1.0e-23	GO:0004674, protein serine/threonine kinase activity;GO:0004702, signal transducer, downstream of receptor, with serine/threonine kinase activity;GO:0004709, MAP kinase kinase kinase activity;GO:0005524, ATP binding;GO:0005737, cytoplasm;GO:0005874, microtubule;GO:0043622, cortical microtubule organization;GO:0046777, protein autophosphorylation;GO:0048046, apoplast	-	5.8004	5.68679	7.52946	7.1995	10.2977	7.45386	9.97996	10.9852	6.66894	11.5202	7.77666	9.71937	9.31247	28.8825	13.3526	9.83254	7.47093	7.6334
T_35667_c0_g1	gi|734355771|gb|KHN13967.1| Putative glutamate--tRNA ligase, cytoplasmic [Glycine soja] 0.0e+00	GO:0003723, RNA binding;GO:0004818, glutamate-tRNA ligase activity;GO:0004819, glutamine-tRNA ligase activity;GO:0005524, ATP binding;GO:0005737, cytoplasm;GO:0005739, mitochondrion;GO:0005829, cytosol;GO:0006424, glutamyl-tRNA aminoacylation;GO:0006425, glutaminyl-tRNA aminoacylation	K01885-ko00970 Aminoacyl-tRNA biosynthesis;ko00860 Porphyrin and chlorophyll metabolism	68.0434	41.8266	29.7276	16.352	22.7318	25.8175	24.1202	25.394	13.2973	14.2102	16.7512	16.1282	17.237	14.3421	15.5425	23.5458	27.1871	30.7792
T_35707_c0_g1	gi|734404144|gb|KHN32880.1| Protein CENTRORADIALIS [Glycine soja] 3.8e-48	GO:0005737, cytoplasm;GO:0009908, flower development;GO:0030154, cell differentiation	-	74.6225	74.7412	46.7561	2.45761	11.1971	30.196	8.82785	3.15538	7.05507	8.00505	31.7354	25.3711	47.1363	17.0693	49.233	19.5603	44.8486	54.9387
T_35720_c0_g1	gi|734337523|gb|KHN08460.1| hypothetical protein glysoja_014225 [Glycine soja] 4.0e-28	-	-	0.477919	0	0	0	0.916643	0.408616	0.868765	0	1.81895	4.55728	6.53232	0	0.663778	2.1347	13.0045	15.4856	1.42635	0.978757
T_35722_c0_g2	gi|571445374|ref|XP_006576783.1| PREDICTED: sigma factor binding protein 1, chloroplastic-like [Glycine max] 2.7e-44	GO:0005634, nucleus;GO:0009507, chloroplast;GO:0051091, positive regulation of DNA binding transcription factor activity	-	3.81075	4.01028	2.84518	9.49923	4.80835	3.63698	4.11115	7.53847	7.26575	5.60985	7.98732	5.78523	4.18568	8.22653	14.673	6.61132	4.24302	5.94625
T_35733_c0_g1	gi|351726365|ref|NP_001236868.1| uncharacterized protein LOC100527240 [Glycine max] 2.1e-87	GO:0009535, chloroplast thylakoid membrane;GO:0009538, photosystem I reaction center;GO:0015979, photosynthesis;GO:0016021, integral component of membrane	K02699-ko00195 Photosynthesis	3.14734	2.5056	4.44504	7.49525	3.98384	3.25	6.30955	4.88793	10.4627	7.20581	3.51673	4.73935	11.9748	17.1853	5.00327	8.5606	6.51468	10.2901
T_35786_c0_g2	gi|965603433|dbj|BAT90610.1| hypothetical protein VIGAN_06187900 [Vigna angularis var. angularis] 4.1e-31	GO:0005784, Sec61 translocon complex;GO:0006886, intracellular protein transport;GO:0016021, integral component of membrane	K09481-ko03060 Protein export;ko04141 Protein processing in endoplasmic reticulum;ko04145 Phagosome	4.22485	6.27695	7.2644	7.59877	6.72522	17.058	8.02377	4.40524	15.1766	9.21481	9.04627	14.2803	15.0331	12.4128	8.10205	6.77274	13.2421	11.5448
T_35833_c0_g1	gi|955378842|ref|XP_014625128.1| PREDICTED: uncharacterized protein LOC100815502 [Glycine max] 1.2e-50	-	-	28.2648	41.4972	29.5661	0.448936	5.86744	1.95261	25.3666	19.7821	9.21442	25.3995	55.07	21.0026	14.9349	18.5375	13.5881	48.3203	70.2019	60.912
T_35875_c0_g1	gi|734389811|gb|KHN26447.1| hypothetical protein glysoja_030401 [Glycine soja] 3.3e-138	GO:0005886, plasma membrane;GO:0006952, defense response;GO:0009615, response to virus;GO:0016021, integral component of membrane;GO:0046741, transport of virus in host, tissue to tissue	-	9.52689	3.43057	2.85191	0.377055	0.532292	0.879104	0.937129	0.499771	0.353311	0.142452	0.524485	0.540203	0.687536	0.50667	0.404415	0.511458	1.0088	1.09016
T_35877_c0_g1	gi|571461308|ref|XP_006581955.1| PREDICTED: uncharacterized protein LOC100802285 [Glycine max] 1.2e-78	GO:0005886, plasma membrane;GO:0006952, defense response;GO:0016021, integral component of membrane	-	26.7059	10.9712	9.07072	2.15076	5.10576	6.09079	2.50047	1.35197	1.8676	1.03561	1.68197	3.50832	3.92881	1.80732	1.68927	1.27829	4.2213	4.51397
T_35888_c0_g1	gi|951072317|ref|XP_014491642.1| PREDICTED: tubulin gamma-1 chain [Vigna radiata var. radiata] 1.3e-271	GO:0000911, cytokinesis by cell plate formation;GO:0000930, gamma-tubulin complex;GO:0003924, GTPase activity;GO:0005525, GTP binding;GO:0005634, nucleus;GO:0005737, cytoplasm;GO:0005739, mitochondrion;GO:0005874, microtubule;GO:0005886, plasma membrane;GO:0005938, cell cortex;GO:0007020, microtubule nucleation;GO:0009624, response to nematode;GO:0010103, stomatal complex morphogenesis;GO:0031122…	-	20.4311	9.87098	8.07624	4.62647	6.24927	7.81148	6.75863	7.07987	4.13034	3.70951	3.92418	4.57426	3.63997	3.67104	4.86937	3.87522	5.56501	8.29997
T_35907_c0_g1	-	-	-	23.9522	43.1058	22.5448	12.77	21.2689	28.6498	10.8128	25.816	22.7869	10.947	21.903	19.4599	13.2296	8.50607	12.992	12.8278	6.63353	20.6791
T_35908_c0_g1	gi|734407629|gb|KHN34435.1| Dehydration-responsive element-binding protein 1F [Glycine soja] 1.2e-93	GO:0003677, DNA binding;GO:0003700, DNA binding transcription factor activity;GO:0005634, nucleus;GO:0006351, transcription, DNA-templated;GO:0009409, response to cold;GO:0009414, response to water deprivation;GO:0009631, cold acclimation	-	2.01204	7.09582	9.02151	0	5.01758	0.317914	44.2947	17.9062	10.3577	35.5013	52.0982	3.85302	13.2232	12.5137	12.7475	156.59	85.4668	55.7282
T_35912_c0_g1	gi|356569006|ref|XP_003552698.1| PREDICTED: uncharacterized protein LOC100791068 [Glycine max] 5.4e-69	GO:0005509, calcium ion binding	-	29.3555	19.3092	17.0874	19.8541	22.3539	22.4489	20.5926	19.556	12.1123	15.4489	16.2816	11.4478	10.3837	7.54552	7.75215	26.1932	21.9187	38.2884
T_35921_c1_g1	gi|388496562|gb|AFK36347.1| unknown [Lotus japonicus] 1.4e-25	GO:0005634, nucleus;GO:0005737, cytoplasm;GO:0007519, skeletal muscle tissue development;GO:0008270, zinc ion binding;GO:0008307, structural constituent of muscle;GO:0030018, Z disc;GO:0030154, cell differentiation;GO:0045214, sarcomere organization;GO:0060537, muscle tissue development;GO:0090175, regulation of establishment of planar polarity	-	4.91915	6.23376	7.30269	10.7353	5.10538	9.72226	8.10503	4.42518	7.78615	7.58131	4.35175	14.7857	7.4183	8.80675	5.87928	8.74419	14.212	14.6703
T_35925_c0_g1	gi|351722283|ref|NP_001235447.1| uncharacterized protein LOC100526881 [Glycine max] 1.4e-71	GO:0004842, ubiquitin-protein transferase activity;GO:0008270, zinc ion binding;GO:0016567, protein ubiquitination;GO:0016874, ligase activity;GO:0043161, proteasome-mediated ubiquitin-dependent protein catabolic process;GO:0051865, protein autoubiquitination;GO:0061630, ubiquitin protein ligase activity	-	9.48937	2.95698	3.99539	0.513429	2.23499	1.78165	0.409481	0.674285	0.366215	0.6639	1.16523	0.682861	2.08454	0.910447	1.10304	0.246163	1.98276	1.93115
T_35925_c0_g2	gi|734406446|gb|KHN33975.1| E3 ubiquitin ligase BIG BROTHER-related [Glycine soja] 3.3e-50	GO:0004842, ubiquitin-protein transferase activity;GO:0008270, zinc ion binding;GO:0016567, protein ubiquitination;GO:0016874, ligase activity;GO:0043161, proteasome-mediated ubiquitin-dependent protein catabolic process;GO:0051865, protein autoubiquitination;GO:0061630, ubiquitin protein ligase activity	-	6.17316	5.32976	4.30072	1.03034	2.61388	2.87849	2.02135	0.92758	0.85679	0.564458	2.15651	0.871859	2.58989	0.698008	1.61177	1.4203	2.52642	4.67125
T_35957_c0_g1	gi|571448839|ref|XP_006577971.1| PREDICTED: WEB family protein At1g75720-like isoform X2 [Glycine max] 3.9e-91	GO:0005829, cytosol;GO:0009903, chloroplast avoidance movement;GO:0009904, chloroplast accumulation movement	-	8.28205	4.54884	4.83785	1.19855	2.20757	4.27648	1.71598	0.847279	0.918401	1.14139	1.63858	2.33531	1.67078	1.38759	1.337	1.96125	1.94949	2.97781
T_35981_c0_g1	gi|571547642|ref|XP_006602683.1| PREDICTED: uncharacterized protein LOC102668200 [Glycine max] 2.8e-27	-	-	14.4809	14.7916	21.6789	0.145356	1.58178	0.941586	0.405718	0.359762	0.516492	0.822343	2.02059	6.45943	0.354073	0.240567	0.572492	1.52429	2.74041	5.8367
T_36037_c0_g1	gi|356552933|ref|XP_003544816.1| PREDICTED: probable 2-oxoglutarate/Fe(II)-dependent dioxygenase [Glycine max] 2.2e-182	GO:0002229, defense response to oomycetes;GO:0002239, response to oomycetes;GO:0009617, response to bacterium;GO:0009620, response to fungus;GO:0009751, response to salicylic acid;GO:0010150, leaf senescence;GO:0046244, salicylic acid catabolic process;GO:0046872, metal ion binding;GO:0051213, dioxygenase activity	-	10.4217	16.295	12.0334	3.99608	5.63614	7.1676	5.27198	3.12397	3.25008	5.64818	8.25047	6.56709	7.23858	5.52039	10.1856	9.12011	19.6309	17.5868
T_36040_c0_g1	gi|951021128|ref|XP_014512589.1| PREDICTED: hevamine-A [Vigna radiata var. radiata] 3.4e-141	GO:0000272, polysaccharide catabolic process;GO:0004553, hydrolase activity, hydrolyzing O-glycosyl compounds;GO:0004568, chitinase activity;GO:0005576, extracellular region;GO:0005615, extracellular space;GO:0005975, carbohydrate metabolic process;GO:0006032, chitin catabolic process;GO:0008061, chitin binding;GO:0009409, response to cold;GO:0009611, response to wounding;GO:0009642, response to …	K01183-ko00520 Amino sugar and nucleotide sugar metabolism	7.11735	5.36104	5.94553	39.6004	39.8772	25.6744	21.7272	17.4448	47.5499	27.4257	16.1431	7.71671	33.0514	19.5295	21.2096	23.7554	22.1815	17.1628
T_36053_c0_g1	gi|356521169|ref|XP_003529230.1| PREDICTED: G-type lectin S-receptor-like serine/threonine-protein kinase At1g34300 [Glycine max] 0.0e+00	GO:0004674, protein serine/threonine kinase activity;GO:0005516, calmodulin binding;GO:0005524, ATP binding;GO:0005886, plasma membrane;GO:0006468, protein phosphorylation;GO:0016021, integral component of membrane;GO:0030246, carbohydrate binding;GO:0048544, recognition of pollen	-	15.6056	22.9508	30.8975	40.2406	35.1273	20.9288	48.4562	30.0975	46.4266	48.3676	53.7273	16.8645	40.8094	43.9046	49.7295	89.2155	54.1971	29.8636
T_36058_c0_g1	gi|356552348|ref|XP_003544530.1| PREDICTED: uncharacterized protein ycf36 [Glycine max] 3.4e-111	GO:0009842, cyanelle;GO:0016021, integral component of membrane	-	2.7117	4.23293	2.06055	2.95666	2.76246	2.76776	2.27163	5.76799	4.24852	3.15152	4.48558	3.32383	5.11086	7.78799	5.79121	5.99981	5.55733	6.2403
T_36061_c0_g1	gi|955391484|ref|XP_014627836.1| PREDICTED: histidine-containing phosphotransfer protein 1-like isoform X1 [Glycine max] 1.4e-19	GO:0000160, phosphorelay signal transduction system;GO:0004871, signal transducer activity;GO:0005622, intracellular	-	42.9917	27.8155	39.1973	7.38871	9.66245	24.9117	9.25328	8.33952	9.54552	4.57926	7.98708	20.4097	16.2033	8.87712	8.5085	8.51874	14.8517	26.2876
T_36062_c0_g1	gi|1012358255|gb|KYP69439.1| hypothetical protein KK1_008629 [Cajanus cajan] 4.4e-46	-	-	13.9255	8.09394	8.85518	2.93089	4.06199	7.24267	5.35796	4.66718	2.69885	3.73183	3.68299	1.78858	4.37249	3.84103	4.0269	4.82774	5.49796	7.54222
T_36081_c0_g1	gi|955324722|ref|XP_014632003.1| PREDICTED: TITAN-like protein isoform X2 [Glycine max] 4.5e-125	GO:0005634, nucleus;GO:0009793, embryo development ending in seed dormancy;GO:0009960, endosperm development;GO:0046872, metal ion binding	-	8.64533	7.69142	5.46333	3.73033	0.640334	3.78357	5.01847	5.03169	4.34222	3.19692	3.67327	3.02038	5.42372	3.38339	3.79001	1.84302	2.53113	3.40763
T_36112_c0_g1	gi|356576185|ref|XP_003556214.1| PREDICTED: Golgi to ER traffic protein 4 homolog [Glycine max] 1.5e-168	GO:0045048, protein insertion into ER membrane;GO:0071818, BAT3 complex	-	15.7394	11.6522	8.44055	4.68877	6.2967	7.70416	8.60736	6.67832	3.94198	5.13776	4.9299	5.96248	4.67391	5.34189	6.32285	4.36098	5.39437	6.46635
T_36121_c0_g1	gi|734395759|gb|KHN29117.1| Putative WRKY transcription factor 51 [Glycine soja] 6.0e-74	GO:0003700, DNA binding transcription factor activity;GO:0005634, nucleus;GO:0006351, transcription, DNA-templated;GO:0009867, jasmonic acid mediated signaling pathway;GO:0042742, defense response to bacterium;GO:0043565, sequence-specific DNA binding;GO:0050832, defense response to fungus	-	11.7968	8.72747	5.81149	4.25683	3.49823	3.6403	10.1924	8.22631	5.34555	10.6228	7.93287	1.38036	11.5992	15.9771	7.84186	30.0522	15.0614	19.3947
T_36126_c0_g1	gi|947127342|gb|KRH75196.1| hypothetical protein GLYMA_01G069000 [Glycine max] 3.6e-39	GO:0016021, integral component of membrane	-	169.857	133.413	208.162	38.8125	68.4464	40.055	160.322	154.494	87.8256	108.791	129.015	49.1518	111.257	148.756	128.822	273.161	199.161	232.572
T_36133_c0_g1	gi|356540528|ref|XP_003538740.1| PREDICTED: metalloendoproteinase 1-MMP-like [Glycine max] 6.3e-173	GO:0004222, metalloendopeptidase activity;GO:0005886, plasma membrane;GO:0008270, zinc ion binding;GO:0031012, extracellular matrix;GO:0031225, anchored component of membrane	-	5.25848	5.78148	4.35404	5.51218	7.14098	5.70096	6.62637	6.40993	10.6033	8.40069	12.1948	7.7943	14.1629	15.2459	24.8265	10.3896	8.08844	8.7238
T_36187_c0_g1	gi|356507827|ref|XP_003522665.1| PREDICTED: uncharacterized protein LOC100787739 [Glycine max] 4.2e-31	-	-	11.2486	19.4992	19.7518	5.49172	6.74907	2.5349	13.5694	11.1004	7.39143	10.823	23.7421	9.59482	7.53102	9.48618	14.707	32.6026	30.0771	50.5445
T_36201_c0_g1	gi|571495938|ref|XP_006593448.1| PREDICTED: uncharacterized protein LOC100799417 isoform X1 [Glycine max] 5.1e-32	GO:0007275, multicellular organism development	-	654.837	352.466	419.306	645.031	375.843	210.979	749.494	1086.46	730.828	793.204	392.747	364.784	837.65	1292.45	828.128	1562.94	802.543	617.805
T_36281_c0_g2	gi|571489242|ref|XP_003538225.2| PREDICTED: subtilisin inhibitor CLSI-I-like [Glycine max] 2.4e-32	GO:0004867, serine-type endopeptidase inhibitor activity;GO:0009611, response to wounding	-	7.05446	16.6213	30.6176	0.363679	0.396348	0.956014	0.871772	1.02895	0.151225	1.3015	5.41394	12.4342	1.10886	1.50551	1.49905	2.52611	3.55045	9.25124
T_36303_c0_g1	gi|356500946|ref|XP_003519291.1| PREDICTED: protein NETWORKED 4A-like isoform X1 [Glycine max] 5.6e-299	GO:0005774, vacuolar membrane	-	4.68433	4.4768	8.09017	2.32622	1.31138	2.34898	6.45854	2.43757	1.94499	2.42038	5.15831	1.53233	2.89829	2.34271	3.34931	8.71691	10.0475	11.2274
T_36352_c0_g1	gi|734397074|gb|KHN29939.1| hypothetical protein glysoja_014757 [Glycine soja] 5.4e-11	-	-	0.17595	0.519976	0.7918	1.90433	2.53168	0	4.71521	2.8193	3.47106	9.86737	1.91341	0.302603	2.91124	15.8362	1.25564	28.6922	11.0607	21.2269
T_36363_c0_g1	gi|657960216|ref|XP_008371679.1| PREDICTED: glucose-induced degradation protein 8 homolog, partial [Malus domestica] 3.1e-39	GO:0005634, nucleus	-	37.9762	22.0402	21.1809	10.8247	8.33899	19.9545	15.8396	12.0598	10.9626	10.1011	8.76217	8.62259	11.8168	8.73527	8.9203	9.78084	11.9724	18.8032
T_36364_c0_g1	gi|947103783|gb|KRH52166.1| hypothetical protein GLYMA_06G050300 [Glycine max] 1.0e-100	GO:0003677, DNA binding;GO:0003700, DNA binding transcription factor activity;GO:0005886, plasma membrane;GO:0006355, regulation of transcription, DNA-templated;GO:0006979, response to oxidative stress;GO:0046872, metal ion binding	-	6.14363	8.62808	5.45148	4.90515	6.50562	3.44164	3.66828	4.65236	8.46635	9.43875	2.66181	11.4638	14.5088	42.998	11.7723	17.6205	9.54648	3.31425
T_36368_c0_g1	gi|351725623|ref|NP_001236587.1| uncharacterized LOC100527221 [Glycine max] 4.5e-112	GO:0004364, glutathione transferase activity;GO:0005737, cytoplasm;GO:0006749, glutathione metabolic process;GO:0009407, toxin catabolic process;GO:0009734, auxin-activated signaling pathway	K00799-ko00480 Glutathione metabolism;ko00980 Metabolism of xenobiotics by cytochrome P450;ko00982 Drug metabolism - cytochrome P450	1.26396	1.62778	1.52086	1.58578	0.483447	0.424387	0.126553	1.05521	0.709404	1.67394	0.656075	0.65989	1.57513	5.57534	0.198218	11.4081	4.14119	1.41917
T_36368_c0_g2	gi|734389204|gb|KHN26196.1| hypothetical protein glysoja_035489 [Glycine soja] 9.5e-42	-	-	54.5562	23.7108	24.1563	15.9548	17.5751	15.9757	14.9106	17.1332	8.56502	13.8432	10.58	13.3873	16.0476	10.0339	7.21699	23.1416	32.7433	36.4028
T_36370_c0_g1	-	-	-	32.2674	33.871	52.611	37.8834	48.6396	32.5887	77.2026	38.3339	37.8581	65.3274	41.0546	18.6769	39.7325	22.6833	63.4458	89.8274	76.6927	105.874
T_36389_c0_g1	gi|734311681|gb|KHN00098.1| Transcription factor MYB39 [Glycine soja] 2.6e-144	GO:0003677, DNA binding;GO:0003700, DNA binding transcription factor activity;GO:0005634, nucleus	-	10.0095	13.9889	11.6667	0.502321	0.283864	0.220785	0.431251	1.5172	0.72271	0.654742	2.9068	4.09779	0.401345	0.629813	0.658896	1.67788	2.48156	3.11375
T_36403_c0_g1	gi|571562155|ref|XP_006605245.1| PREDICTED: VQ motif-containing protein 8, chloroplastic-like [Glycine max] 1.7e-40	GO:0009507, chloroplast	-	1.38221	1.16037	0.704219	0.207158	0.813616	0.167432	1.65751	0.732774	2.92749	0.935676	1.56201	0.222468	1.68592	0.428936	0.817369	4.80844	9.03318	7.19391
T_36414_c0_g1	gi|351724599|ref|NP_001237575.1| uncharacterized protein LOC100499895 [Glycine max] 6.2e-46	GO:0005507, copper ion binding;GO:0005509, calcium ion binding;GO:0005516, calmodulin binding;GO:0005546, phosphatidylinositol-4,5-bisphosphate binding;GO:0005547, phosphatidylinositol-3,4,5-trisphosphate binding;GO:0005881, cytoplasmic microtubule;GO:0005886, plasma membrane;GO:0006499, N-terminal protein myristoylation;GO:0008017, microtubule binding;GO:0009414, response to water deprivation;GO…	-	16.0253	10.507	11.7062	2.10588	4.79266	10.4012	2.82656	2.76413	4.88567	2.68936	7.37327	6.3124	7.55968	3.52458	6.33026	2.42896	4.4701	5.36573
T_36454_c0_g1	gi|734323037|gb|KHN04690.1| hypothetical protein glysoja_040012 [Glycine soja] 3.5e-26	-	-	22.3922	10.1183	7.53968	26.1655	12.2286	8.05994	22.9163	30.3595	28.7644	73.2181	24.8406	5.30955	64.1211	93.8091	38.384	100.767	56.9909	115.057
T_36454_c0_g2	gi|734323037|gb|KHN04690.1| hypothetical protein glysoja_040012 [Glycine soja] 4.1e-22	-	-	5.23208	2.69821	2.12893	6.286	3.15454	0.867051	1.01407	3.17969	1.34011	8.74346	3.55691	3.08341	4.40977	9.83775	0	12.4649	9.34602	9.77272
T_36455_c0_g1	gi|734429890|gb|KHN45315.1| hypothetical protein glysoja_047888 [Glycine soja] 5.8e-28	-	-	51.9306	14.721	12.3408	18.5241	12.8106	2.80629	25.9324	56.3822	27.8897	35.3296	11.7931	9.04457	69.9405	71.0326	43.7479	89.9249	30.2946	36.2366
T_36472_c0_g1	-	-	-	1.20749	0.247542	0	0	0.159286	0	1.46306	2.44018	1.50344	5.70405	3.44777	0.518901	12.7662	37.6293	3.39739	53.3163	9.56286	16.7947
T_36482_c0_g1	gi|920680428|gb|KOM27293.1| hypothetical protein LR48_Vigan406s010300 [Vigna angularis] 1.3e-188	GO:0004553, hydrolase activity, hydrolyzing O-glycosyl compounds;GO:0005576, extracellular region;GO:0005618, cell wall;GO:0005634, nucleus;GO:0005737, cytoplasm;GO:0005975, carbohydrate metabolic process;GO:0006952, defense response;GO:0030247, polysaccharide binding;GO:0042973, glucan endo-1,3-beta-D-glucosidase activity;GO:0046658, anchored component of plasma membrane;GO:0071555, cell wall or…	-	9.07665	6.19029	4.16445	2.48474	2.99885	3.41631	2.84942	1.8751	1.22793	1.11413	1.80788	2.3952	1.8237	0.800872	1.44503	1.26431	2.0954	2.73892
T_36488_c0_g1	gi|1012338747|gb|KYP49993.1| putative RNA-dependent RNA polymerase 1 [Cajanus cajan] 1.1e-29	GO:0000166, nucleotide binding;GO:0003723, RNA binding;GO:0003968, RNA-directed 5'-3' RNA polymerase activity;GO:0031047, gene silencing by RNA	-	91.9478	34.4037	27.5395	7.20035	18.7398	8.05535	24.8987	26.8126	8.87228	7.99796	11.4102	6.16752	3.60606	12.5777	11.1239	24.4507	22.8568	26.0436
T_36488_c0_g2	gi|356499585|ref|XP_003518619.1| PREDICTED: RNA-dependent RNA polymerase 1 [Glycine max] 2.5e-18	GO:0000166, nucleotide binding;GO:0003723, RNA binding;GO:0003968, RNA-directed 5'-3' RNA polymerase activity;GO:0031047, gene silencing by RNA	-	67.3592	20.0253	24.0509	13.4135	16.0474	15.9252	15.42	13.2949	3.58082	8.19467	10.6504	7.43574	10.3601	3.35609	3.49607	23.9967	12.9281	31.4045
T_36497_c0_g2	gi|1012335003|gb|KYP46346.1| Uncharacterized protein YHR209W family [Cajanus cajan] 5.6e-112	GO:0005737, cytoplasm;GO:0005768, endosome;GO:0005774, vacuolar membrane;GO:0005802, trans-Golgi network;GO:0008757, S-adenosylmethionine-dependent methyltransferase activity;GO:0032259, methylation;GO:0045335, phagocytic vesicle	-	9.52971	11.9305	10.8933	24.6859	16.3219	10.4623	11.2756	11.2533	9.01784	29.7731	10.5932	5.46942	32.0593	63.0729	6.2028	35.3053	17.387	15.4061
T_36508_c0_g1	-	-	-	2.6516	1.91515	2.53831	21.1522	14.6255	11.0277	16.4657	19.2493	20.7339	36.566	5.72198	2.94962	34.7246	21.4493	8.80341	24.6143	30.099	33.528
T_36535_c0_g1	gi|356573237|ref|XP_003554769.1| PREDICTED: protein DEFECTIVE IN MERISTEM SILENCING 3 [Glycine max] 3.3e-95	GO:0000419, DNA-directed RNA polymerase V complex;GO:0006306, DNA methylation;GO:0031047, gene silencing by RNA;GO:0042803, protein homodimerization activity;GO:0070921, regulation of production of siRNA involved in chromatin silencing by small RNA;GO:0080188, RNA-directed DNA methylation	-	11.1093	7.5929	6.80227	2.93465	3.75812	5.24732	4.99783	4.29686	2.3323	1.83704	2.90381	2.94258	3.31344	2.59287	3.86154	6.39101	4.90995	9.26591
T_36536_c0_g1	gi|734380782|gb|KHN22962.1| F-box/kelch-repeat protein [Glycine soja] 1.4e-52	GO:0015031, protein transport;GO:0016192, vesicle-mediated transport;GO:0030663, COPI-coated vesicle membrane	-	73.5494	48.8769	39.1456	30.7347	40.022	49.4466	37.093	40.0222	23.5648	25.6887	30.3094	25.0423	24.6706	24.0085	23.5559	29.5189	34.3146	47.4614
T_36571_c1_g1	gi|965607563|dbj|BAT94054.1| hypothetical protein VIGAN_08062100, partial [Vigna angularis var. angularis] 1.9e-92	GO:0009535, chloroplast thylakoid membrane;GO:0009538, photosystem I reaction center;GO:0015979, photosynthesis	K02692-ko00195 Photosynthesis	5.46362	5.44607	3.48982	5.6104	2.25412	2.03856	5.04743	8.8503	8.73931	4.6121	4.28526	4.89369	16.1182	13.0944	13.958	9.95505	5.37356	6.48768
T_36580_c0_g1	gi|1012348811|gb|KYP60002.1| hypothetical protein KK1_015449 [Cajanus cajan] 5.6e-140	-	-	14.1497	7.76168	7.24777	6.34788	3.26881	8.25564	5.16184	4.09526	3.98025	2.36138	5.184	5.17499	4.62197	3.76715	3.43958	2.02551	4.33582	5.03741
T_36633_c0_g1	gi|571543091|ref|XP_006602032.1| PREDICTED: uncharacterized protein LOC102663613 [Glycine max] 1.1e-181	-	-	6.77064	6.34715	10.5115	11.5966	10.6611	7.98876	11.2813	13.6845	10.4997	20.1378	6.42482	3.10278	15.3259	17.4721	5.12676	29.996	15.3726	17.3595
T_36655_c0_g1	-	GO:0001725, stress fiber;GO:0001952, regulation of cell-matrix adhesion;GO:0003779, actin binding;GO:0005915, zonula adherens;GO:0005925, focal adhesion;GO:0005927, muscle tendon junction;GO:0008270, zinc ion binding;GO:0015629, actin cytoskeleton;GO:0016323, basolateral plasma membrane;GO:0030018, Z disc;GO:0030239, myofibril assembly;GO:0031252, cell leading edge;GO:0045177, apical part of cell…	-	0.951479	2.17333	1.97701	12.2559	0.884139	4.55687	5.14817	0.611819	1.79212	0.915158	3.52407	4.92404	1.96556	1.38713	1.33172	3.86155	9.52538	5.42206
T_36666_c0_g1	gi|593693458|ref|XP_007147250.1| hypothetical protein PHAVU_006G108500g [Phaseolus vulgaris] 3.1e-138	GO:0005634, nucleus;GO:0016567, protein ubiquitination;GO:0030246, carbohydrate binding	-	13.7169	15.8762	11.9154	6.51736	7.42704	10.4063	6.05952	8.29328	4.54575	6.10123	6.95132	11.488	5.53432	6.25041	4.69751	4.76171	8.29702	5.56732
T_36666_c0_g2	gi|920715619|gb|KOM55707.1| hypothetical protein LR48_Vigan10g159900 [Vigna angularis] 4.0e-44	GO:0016567, protein ubiquitination;GO:0030246, carbohydrate binding	-	0.915678	1.47733	1.50425	1.59852	3.21172	1.21613	4.02447	2.04025	5.43005	3.70419	3.62421	1.90913	10.0642	8.259	23.6888	3.62079	5.499	9.11305
T_36669_c0_g1	gi|734428431|gb|KHN44736.1| hypothetical protein glysoja_032075 [Glycine soja] 1.9e-53	GO:0005737, cytoplasm;GO:0030001, metal ion transport;GO:0046914, transition metal ion binding;GO:0046916, cellular transition metal ion homeostasis	-	2.65923	0.597317	2.27094	0.320251	0.27958	0.172526	2.13604	1.85545	0.532374	1.69354	1.56181	0.305694	1.47725	3.47649	0.459568	5.56451	7.18742	6.79838
T_36679_c0_g1	gi|356543592|ref|XP_003540244.1| PREDICTED: uncharacterized protein LOC100808779 [Glycine max] 1.9e-180	GO:0016787, hydrolase activity	-	16.3508	13.4512	8.92619	2.80063	5.84557	4.00404	6.60166	9.39166	3.3713	3.86228	8.88358	4.60679	5.73471	6.51451	6.4637	6.82672	7.51124	9.81776
T_36683_c0_g1	gi|734340045|gb|KHN09155.1| Phosphopantothenate--cysteine ligase 2 [Glycine soja] 5.2e-164	GO:0004632, phosphopantothenate--cysteine ligase activity;GO:0015937, coenzyme A biosynthetic process	K01922-ko00770 Pantothenate and CoA biosynthesis	8.01891	5.86673	5.53473	1.83502	2.86096	4.31011	4.45004	3.43474	2.04984	2.11141	3.11389	2.03162	2.89172	2.03442	2.91458	2.83593	4.36573	4.9216
T_36697_c0_g1	gi|571459706|ref|XP_003526531.2| PREDICTED: protein ASPARTIC PROTEASE IN GUARD CELL 2-like [Glycine max] 9.1e-225	GO:0004190, aspartic-type endopeptidase activity;GO:0005618, cell wall;GO:0006508, proteolysis;GO:0009505, plant-type cell wall;GO:0009627, systemic acquired resistance;GO:0030163, protein catabolic process;GO:0048046, apoplast	-	14.2903	27.3702	39.0675	60.5532	81.1424	57.8006	79.0234	80.8402	95.7763	110.985	132.869	62.8393	115.952	61.6759	142.935	86.4222	46.2834	40.1625
T_36711_c0_g1	gi|950971814|ref|XP_014500395.1| PREDICTED: uncharacterized protein LOC106761361 [Vigna radiata var. radiata] 7.9e-34	GO:0006950, response to stress	-	51.5677	30.2674	30.8823	20.1169	17.2325	14.9329	23.569	21.8595	12.8343	13.8734	17.1597	13.7045	15.5697	18.3515	14.0981	27.2653	22.0751	25.3391
T_36722_c0_g1	gi|356522432|ref|XP_003529850.1| PREDICTED: CCAAT/enhancer-binding protein zeta-like [Glycine max] 1.0e-271	GO:0000978, RNA polymerase II proximal promoter sequence-specific DNA binding;GO:0001077, transcriptional activator activity, RNA polymerase II proximal promoter sequence-specific DNA binding;GO:0003677, DNA binding;GO:0005634, nucleus;GO:0006366, transcription by RNA polymerase II;GO:0045944, positive regulation of transcription by RNA polymerase II	-	10.2808	7.64119	7.03886	9.27303	6.05184	7.36718	6.03266	6.01438	4.48141	3.91863	4.91892	4.39597	3.30337	2.9198	4.76328	2.53265	4.16831	3.50241
T_36751_c0_g1	gi|359807584|ref|NP_001241413.1| uncharacterized protein LOC100816598 [Glycine max] 3.6e-56	GO:0003700, DNA binding transcription factor activity;GO:0005634, nucleus;GO:0006351, transcription, DNA-templated;GO:0006355, regulation of transcription, DNA-templated;GO:0010200, response to chitin;GO:0043565, sequence-specific DNA binding;GO:0044212, transcription regulatory region DNA binding;GO:0046872, metal ion binding;GO:0071289, cellular response to nickel ion;GO:2000280, regulation of …	-	3.17146	3.05914	3.23246	6.83322	8.26925	6.517	8.18018	12.46	5.1818	16.8427	12.2506	3.75438	10.5534	18.2932	5.49767	31.7561	13.4515	8.84696
T_36751_c0_g2	gi|356568969|ref|XP_003552680.1| PREDICTED: zinc finger protein ZAT11-like [Glycine max] 2.7e-79	GO:0003700, DNA binding transcription factor activity;GO:0005634, nucleus;GO:0006351, transcription, DNA-templated;GO:0006355, regulation of transcription, DNA-templated;GO:0010200, response to chitin;GO:0043565, sequence-specific DNA binding;GO:0044212, transcription regulatory region DNA binding;GO:0046872, metal ion binding;GO:0071289, cellular response to nickel ion;GO:2000280, regulation of …	-	13.803	14.094	19.7528	18.7113	24.1942	11.1095	29.7149	29.4058	30.1379	42.8027	57.7856	12.3918	39.3101	46.8648	54.854	100.039	56.4927	68.2571
T_36760_c0_g1	gi|593686866|ref|XP_007144104.1| hypothetical protein PHAVU_007G129100g [Phaseolus vulgaris] 1.3e-28	GO:0009507, chloroplast;GO:0016021, integral component of membrane	-	24.0607	37.3562	21.7111	64.8086	51.0034	43.9583	42.5373	69.7077	71.4695	83.6594	45.8971	60.2299	66.1724	127.37	77.0588	39.4645	37.8403	33.6858
T_36796_c0_g1	-	GO:0005576, extracellular region;GO:0007552, metamorphosis;GO:0009615, response to virus;GO:0045297, post-mating behavior	-	2.15651	3.07948	4.45504	6.35773	2.87314	10.4773	6.28734	3.42159	6.55839	5.10068	3.44933	13.3641	7.07417	5.15781	4.9919	6.62383	11.7323	12.3247
T_36797_c0_g1	gi|356571531|ref|XP_003553930.1| PREDICTED: peroxidase 55 [Glycine max] 1.8e-169	GO:0004601, peroxidase activity;GO:0005576, extracellular region;GO:0006979, response to oxidative stress;GO:0020037, heme binding;GO:0042744, hydrogen peroxide catabolic process;GO:0046872, metal ion binding	K00430-ko00940 Phenylpropanoid biosynthesis	14.3543	22.0582	23.7047	41.5871	31.722	20.0922	44.6375	40.7318	47.4279	50.8359	39.1485	17.7554	42.2549	55.7313	51.6446	75.2595	53.9848	62.0555
T_36826_c0_g1	gi|356572830|ref|XP_003554568.1| PREDICTED: short-chain dehydrogenase reductase 3b [Glycine max] 3.5e-139	GO:0016491, oxidoreductase activity	-	6.5621	9.5764	18.8006	43.094	46.9389	51.1562	37.9155	32.4804	40.8157	48.7541	22.4546	16.9138	45.1878	32.7812	51.6926	23.5862	34.8083	32.2884
T_36832_c1_g1	gi|351721899|ref|NP_001237481.1| CASP-like protein 1D1 [Glycine max] 7.2e-25	GO:0005886, plasma membrane;GO:0016021, integral component of membrane	-	44.8858	36.6484	46.8506	98.3885	55.4603	38.5308	48.6299	55.307	70.2939	71.1102	50.0337	42.5486	61.005	112.139	50.1704	145.865	71.3568	53.8178
T_36836_c0_g1	gi|951041343|ref|XP_014517909.1| PREDICTED: proline synthase co-transcribed bacterial homolog protein-like [Vigna radiata var. radiata] 2.2e-121	GO:0005622, intracellular;GO:0005739, mitochondrion;GO:0030170, pyridoxal phosphate binding;GO:0070062, extracellular exosome	-	30.0013	12.1364	11.718	7.31734	5.08989	10.8152	9.8254	10.9024	4.29176	5.70008	7.02618	6.1465	4.39633	6.11388	6.54809	6.6012	6.7938	5.78283
T_36850_c0_g1	gi|947049521|gb|KRG99049.1| hypothetical protein GLYMA_18G116900 [Glycine max] 2.5e-215	GO:0003824, catalytic activity;GO:0004760, serine-pyruvate transaminase activity;GO:0005777, peroxisome;GO:0005886, plasma membrane;GO:0008453, alanine-glyoxylate transaminase activity;GO:0009507, chloroplast;GO:0009570, chloroplast stroma;GO:0009853, photorespiration;GO:0016020, membrane;GO:0048046, apoplast;GO:0050281, serine-glyoxylate transaminase activity	K00830-ko00260 Glycine, serine and threonine metabolism;ko00250 Alanine, aspartate and glutamate metabolism;ko04146 Peroxisome;ko00630 Glyoxylate and dicarboxylate metabolism;ko01200 Carbon metabolism;ko00680 Methane metabolism	3.86225	7.14879	6.26271	2.26833	1.91817	0.954018	3.93034	5.87756	5.67821	9.63306	6.46338	7.34527	7.09583	24.9244	5.63108	21.1313	7.69055	6.06428
T_36860_c0_g1	gi|356502715|ref|XP_003520162.1| PREDICTED: uncharacterized protein LOC100801828 [Glycine max] 4.2e-126	-	-	7.63062	6.72043	6.91165	6.64841	4.36346	5.78881	6.13762	6.32823	3.88118	5.97734	4.48543	4.97553	2.13891	4.20973	1.68974	5.94357	4.06682	3.64846
T_36883_c0_g1	gi|918463735|gb|ALA09212.1| MYB/HD-like transcription factor, partial [Glycine max] 6.5e-104	GO:0003677, DNA binding;GO:0003700, DNA binding transcription factor activity;GO:0005634, nucleus;GO:0006351, transcription, DNA-templated;GO:0009414, response to water deprivation;GO:0009651, response to salt stress;GO:0009723, response to ethylene;GO:0009733, response to auxin;GO:0009737, response to abscisic acid;GO:0009738, abscisic acid-activated signaling pathway;GO:0009739, response to gib…	-	16.5478	22.9443	21.3632	3.09305	8.19893	6.71762	6.83768	9.69328	4.79731	7.584	12.453	15.3048	7.76134	10.4119	9.31151	10.0209	9.6548	9.58255
T_36883_c0_g2	gi|593795696|ref|XP_007160886.1| hypothetical protein PHAVU_001G025200g [Phaseolus vulgaris] 8.8e-113	GO:0003677, DNA binding;GO:0003700, DNA binding transcription factor activity;GO:0005634, nucleus;GO:0006351, transcription, DNA-templated;GO:0009414, response to water deprivation;GO:0009651, response to salt stress;GO:0009723, response to ethylene;GO:0009733, response to auxin;GO:0009737, response to abscisic acid;GO:0009738, abscisic acid-activated signaling pathway;GO:0009739, response to gib…	-	43.4227	84.5086	163.08	24.2094	37.0538	24.1641	99.7434	64.234	70.2994	74.7483	93.0864	48.7081	72.5073	66.2621	79.1681	191.178	174.919	134.091
T_36902_c0_g1	gi|1012355572|gb|KYP66759.1| hypothetical protein KK1_013067 [Cajanus cajan] 1.6e-27	-	-	2.79651	2.90569	6.73972	0.456901	3.71351	0.431536	3.58432	3.17731	1.90087	4.02004	3.56857	1.58148	3.27793	1.44949	1.58173	20.585	16.2466	14.6299
T_36914_c0_g1	gi|947072664|gb|KRH21555.1| hypothetical protein GLYMA_13G245100 [Glycine max] 6.3e-108	GO:0000014, single-stranded DNA endodeoxyribonuclease activity;GO:0003676, nucleic acid binding;GO:0004519, endonuclease activity;GO:0006308, DNA catabolic process;GO:0010150, leaf senescence;GO:0016021, integral component of membrane;GO:0016891, endoribonuclease activity, producing 5'-phosphomonoesters;GO:0043765, T/G mismatch-specific endonuclease activity;GO:0046872, metal ion binding;GO:00801…	-	23.3149	16.2911	15.0847	6.32434	7.10353	10.0691	9.00327	10.1755	12.2382	7.72306	15.437	14.79	9.11378	11.7341	7.89119	10.686	8.55079	10.8043
T_36917_c0_g1	gi|734411806|gb|KHN36192.1| hypothetical protein glysoja_003315 [Glycine soja] 7.8e-64	-	-	14.0449	6.75363	6.98031	4.18247	4.27403	5.27293	3.59501	3.6406	2.67662	2.87333	2.48765	2.65539	3.39802	1.92809	1.90158	2.56806	2.80151	4.01926
T_36963_c0_g1	gi|351725915|ref|NP_001236597.1| brother of FT and TFL1 protein [Glycine max] 2.4e-34	GO:0005737, cytoplasm	-	9.32151	10.3787	9.94533	1.43621	2.97576	2.24215	2.79027	2.01355	1.44519	2.53958	6.80873	4.95212	6.05262	1.19749	6.95985	10.9362	4.63968	9.45818
T_36968_c0_g1	gi|356505457|ref|XP_003521507.1| PREDICTED: probable carboxylesterase 15 [Glycine max] 7.2e-167	GO:0008152, metabolic process;GO:0016787, hydrolase activity;GO:0052689, carboxylic ester hydrolase activity	-	5.79693	6.65924	4.58005	7.72057	4.41339	6.75527	14.0866	17.3823	10.0398	9.78915	16.0398	8.71625	11.1736	18.265	40.4167	8.88171	5.65744	7.91722
T_36976_c0_g1	gi|951021735|ref|XP_014512749.1| PREDICTED: hydroxyethylthiazole kinase [Vigna radiata var. radiata] 3.8e-60	GO:0004417, hydroxyethylthiazole kinase activity;GO:0005524, ATP binding;GO:0009228, thiamine biosynthetic process;GO:0009229, thiamine diphosphate biosynthetic process;GO:0036172, thiamine salvage;GO:0046872, metal ion binding	K00878-ko00730 Thiamine metabolism	2.73482	3.52406	2.88917	4.64933	5.72132	5.14345	5.13089	5.81966	7.36307	4.64793	5.0282	7.13222	5.444	5.33406	6.51704	4.53706	3.48648	5.35882
T_36985_c0_g1	gi|950926675|ref|XP_014515961.1| PREDICTED: putative calcium-transporting ATPase 13, plasma membrane-type [Vigna radiata var. radiata] 1.3e-64	GO:0005388, calcium-transporting ATPase activity;GO:0005524, ATP binding;GO:0005887, integral component of plasma membrane;GO:0016021, integral component of membrane;GO:0043231, intracellular membrane-bounded organelle;GO:0046872, metal ion binding	-	7.77053	12.1713	20.0231	3.47765	1.91445	1.22144	7.21695	2.30852	2.51958	3.73507	8.08516	3.72976	1.78378	3.61128	3.13849	10.1282	8.98263	8.26082
T_36991_c0_g2	gi|920710761|gb|KOM52010.1| hypothetical protein LR48_Vigan09g066900 [Vigna angularis] 4.9e-88	GO:0003700, DNA binding transcription factor activity;GO:0005634, nucleus;GO:0006351, transcription, DNA-templated;GO:0043565, sequence-specific DNA binding	-	8.83208	12.403	14.1597	19.6633	11.5252	7.43442	21.3885	19.0893	12.2738	20.2209	17.303	13.7892	12.6824	35.6563	16.5107	32.4692	31.2121	28.5917
T_37037_c0_g1	gi|947063953|gb|KRH13214.1| hypothetical protein GLYMA_15G223300 [Glycine max] 4.2e-16	-	-	7.80992	8.14379	4.73119	2.55147	2.37448	7.82472	2.29055	3.08454	1.86384	1.12007	0.921593	3.03387	2.47005	0.593416	0.993782	0.633405	0.929318	3.36672
T_37039_c0_g1	gi|920698766|gb|KOM41991.1| hypothetical protein LR48_Vigan04g218900 [Vigna angularis] 3.7e-53	GO:0005739, mitochondrion	K13993-ko04141 Protein processing in endoplasmic reticulum	25.0658	42.8203	47.2699	45.9909	28.8988	39.1946	26.3769	24.3061	43.1168	50.4466	22.8188	28.2131	63.6619	127.107	21.6414	83.5542	80.9188	85.7297
T_37043_c0_g1	gi|947075316|gb|KRH24156.1| hypothetical protein GLYMA_12G024800 [Glycine max] 9.2e-58	GO:0004045, aminoacyl-tRNA hydrolase activity;GO:0005739, mitochondrion;GO:0005829, cytosol;GO:0006915, apoptotic process;GO:0010629, negative regulation of gene expression;GO:0016020, membrane;GO:2000210, positive regulation of anoikis;GO:2000811, negative regulation of anoikis	-	14.7486	9.31599	8.55199	4.29903	6.10349	8.7782	6.9943	6.76434	2.95851	3.99787	4.08775	3.20544	4.63857	3.2551	3.89907	6.14341	5.18059	9.04322
T_37086_c0_g1	gi|356512487|ref|XP_003524950.1| PREDICTED: F-box/kelch-repeat protein At1g15670-like [Glycine max] 2.3e-183	GO:0005829, cytosol;GO:0016567, protein ubiquitination;GO:0031463, Cul3-RING ubiquitin ligase complex;GO:0080037, negative regulation of cytokinin-activated signaling pathway;GO:2000762, regulation of phenylpropanoid metabolic process	-	1.01515	1.24612	1.03624	1.47512	1.85663	2.08986	4.10972	4.06784	7.01493	3.7417	2.94414	2.11377	7.11613	8.08014	9.60691	4.69125	2.48133	1.91676
T_37096_c0_g1	gi|356553557|ref|XP_003545121.1| PREDICTED: cytochrome b561 and DOMON domain-containing protein At3g25290-like [Glycine max] 1.4e-195	GO:0005886, plasma membrane;GO:0009506, plasmodesma;GO:0016021, integral component of membrane;GO:0046872, metal ion binding;GO:0055114, oxidation-reduction process	-	11.9692	8.7404	8.19278	3.07048	4.32885	6.60503	3.99815	2.23339	3.85505	4.10285	4.10332	6.88566	4.21857	4.19467	4.86759	3.23001	4.63666	5.14844
T_37108_c0_g1	gi|351725317|ref|NP_001237344.1| 2-on-2 hemoglobin [Glycine max] 1.8e-40	GO:0001666, response to hypoxia;GO:0005344, oxygen carrier activity;GO:0009733, response to auxin;GO:0015671, oxygen transport;GO:0019825, oxygen binding;GO:0020037, heme binding;GO:0046872, metal ion binding	-	32.1017	23.3839	11.6188	18.9587	25.2979	13.533	30.2584	41.027	24.0119	43.4262	50.6929	11.0239	34.3388	37.9138	83.7121	50.171	48.3566	59.661
T_37111_c0_g3	gi|356515913|ref|XP_003526641.1| PREDICTED: IAA-amino acid hydrolase ILR1-like 6 [Glycine max] 1.2e-237	GO:0008152, metabolic process;GO:0009694, jasmonic acid metabolic process;GO:0009753, response to jasmonic acid;GO:0010112, regulation of systemic acquired resistance;GO:0016787, hydrolase activity;GO:1990206, jasmonyl-Ile conjugate hydrolase activity	-	17.642	15.6725	18.8953	26.0482	18.2176	14.7858	27.4683	28.8227	21.5525	28.5569	41.3271	21.2202	23.6666	38.4208	48.83	42.8844	21.9499	23.2127
T_37118_c0_g1	gi|1012363229|gb|KYP74412.1| Vesicle-associated membrane protein-associated protein SCS2 [Cajanus cajan] 3.3e-156	GO:0005789, endoplasmic reticulum membrane;GO:0005886, plasma membrane;GO:0016021, integral component of membrane;GO:0016032, viral process;GO:0046907, intracellular transport	-	9.2504	3.92507	2.3234	0.787216	0.664022	1.48245	1.44499	1.06991	1.3895	0.607376	1.64243	1.34291	1.12599	0.645121	0.721261	1.30496	2.3477	2.93726
T_37163_c0_g1	gi|734391723|gb|KHN27339.1| Prefoldin subunit 1 [Glycine soja] 2.0e-26	GO:0006457, protein folding;GO:0016272, prefoldin complex	-	45.9467	23.9994	20.1318	9.69333	13.0128	15.6802	11.8525	13.085	7.81407	6.52368	9.78543	9.35226	9.4608	6.86453	8.6368	12.9557	15.3302	17.9402
T_37170_c0_g1	gi|1012342566|gb|KYP53759.1| putative methionyl-tRNA synthetase [Cajanus cajan] 2.5e-164	GO:0000049, tRNA binding;GO:0004825, methionine-tRNA ligase activity;GO:0005524, ATP binding;GO:0005829, cytosol;GO:0006418, tRNA aminoacylation for protein translation;GO:0006431, methionyl-tRNA aminoacylation	-	27.0687	15.6928	16.1407	9.27832	9.19882	12.9342	10.4932	10.8506	8.29062	7.63231	9.70219	6.2389	9.32813	6.64918	6.20884	10.2308	12.0618	13.4179
T_37181_c0_g1	gi|734429229|gb|KHN45033.1| Vacuolar protein sorting-associated protein 27 [Glycine soja] 3.9e-51	GO:0046872, metal ion binding	-	22.0078	14.4139	12.1904	4.26978	6.37137	7.7159	8.24012	8.12438	5.85679	6.17517	5.83591	6.40623	7.09386	6.34045	6.53482	8.0732	8.24237	12.889
T_37183_c0_g1	gi|947065243|gb|KRH14386.1| hypothetical protein GLYMA_14G022700 [Glycine max] 1.2e-21	-	-	3.11641	4.96698	6.94431	6.77484	6.12338	2.45268	6.27056	6.77726	3.39689	6.41332	7.13626	1.6723	5.04324	5.70992	2.2642	21.1539	23.5697	18.943
T_37201_c0_g1	gi|356497957|ref|XP_003517822.1| PREDICTED: uncharacterized protein LOC100802857 [Glycine max] 4.1e-94	-	-	15.3414	4.3911	3.22594	0.994524	0.610447	2.26621	1.58386	1.24211	0.340952	0.523421	1.12161	1.21517	1.32468	0.77427	1.13921	0.63626	1.56693	1.31619
T_37205_c0_g1	gi|571456580|ref|XP_006580428.1| PREDICTED: MACPF domain-containing protein At1g14780-like isoform X1 [Glycine max] 0.0e+00	GO:0009626, plant-type hypersensitive response	-	4.63542	4.10401	4.82058	3.85575	6.88945	4.23679	8.42937	8.8964	9.78715	8.20727	9.95371	6.08181	8.50135	9.15459	12.7006	7.2092	7.11542	8.88664
T_37214_c0_g1	gi|356535242|ref|XP_003536157.1| PREDICTED: uncharacterized protein LOC100801478 [Glycine max] 3.6e-110	GO:0003676, nucleic acid binding	-	8.33412	5.54051	4.49697	3.34329	3.88887	5.48813	4.08165	4.51597	3.13492	2.00552	2.99369	2.29828	1.98303	2.17199	2.50787	4.73411	3.70645	5.32796
T_37219_c0_g1	gi|356528198|ref|XP_003532692.1| PREDICTED: putative receptor-like protein kinase At4g00960 isoform X1 [Glycine max] 4.4e-192	GO:0004674, protein serine/threonine kinase activity;GO:0005524, ATP binding;GO:0005886, plasma membrane;GO:0006468, protein phosphorylation;GO:0006952, defense response;GO:0009506, plasmodesma;GO:0016021, integral component of membrane;GO:0042742, defense response to bacterium	-	8.24666	5.40152	8.79292	2.73143	1.76029	2.08416	3.37011	4.29999	4.89063	2.24298	3.97595	2.85766	2.5155	4.48008	3.74895	7.97535	9.61104	7.38236
T_37220_c0_g1	gi|734392750|gb|KHN27777.1| Putative sugar phosphate/phosphate translocator [Glycine soja] 2.6e-149	GO:0008643, carbohydrate transport;GO:0016021, integral component of membrane;GO:0022626, cytosolic ribosome	-	5.88536	5.8389	4.76125	1.69775	2.79602	3.43948	4.62586	3.57859	2.05004	2.40975	2.84862	2.12666	2.72665	2.61955	1.86343	1.72211	1.80296	2.77057
T_37221_c0_g1	gi|19911587|dbj|BAB86897.1| syringolide-induced protein B13-1-1 [Glycine max] 3.8e-176	GO:0005507, copper ion binding;GO:0005576, extracellular region;GO:0008447, L-ascorbate oxidase activity;GO:0016491, oxidoreductase activity	-	5.50838	12.3887	39.0727	12.3656	14.91	9.88224	42.0822	17.8448	51.2119	29.5747	23.9272	5.69167	22.3364	20.624	25.1917	130.97	98.4544	82.501
T_37229_c0_g2	gi|734400703|gb|KHN31550.1| Peroxidase 66 [Glycine soja] 1.9e-167	GO:0004601, peroxidase activity;GO:0005576, extracellular region;GO:0006979, response to oxidative stress;GO:0009505, plant-type cell wall;GO:0009664, plant-type cell wall organization;GO:0020037, heme binding;GO:0042744, hydrogen peroxide catabolic process;GO:0046872, metal ion binding	K00430-ko00940 Phenylpropanoid biosynthesis	1.89124	2.94132	5.91729	5.33401	12.9433	5.38564	5.44477	3.37953	4.94518	4.86586	7.91897	4.46971	7.17916	8.23986	6.18996	4.20313	4.88092	3.85568
T_37234_c0_g1	gi|571538819|ref|XP_006601212.1| PREDICTED: probable WRKY transcription factor 40 isoform X1 [Glycine max] 4.0e-39	GO:0002237, response to molecule of bacterial origin;GO:0003700, DNA binding transcription factor activity;GO:0005634, nucleus;GO:0006351, transcription, DNA-templated;GO:0009611, response to wounding;GO:0009751, response to salicylic acid;GO:0010200, response to chitin;GO:0031347, regulation of defense response;GO:0042742, defense response to bacterium;GO:0043565, sequence-specific DNA binding;G…	-	4.72381	6.21152	9.47161	2.77897	1.30036	1.65644	7.04777	3.30205	8.53788	2.63862	5.01207	2.7956	2.83211	3.5982	4.98627	7.60194	10.5504	13.8225
T_37256_c0_g2	gi|947094221|gb|KRH42806.1| hypothetical protein GLYMA_08G112500 [Glycine max] 1.0e-71	GO:0005773, vacuole	-	8.92231	14.2435	11.3718	17.5625	17.2888	15.0831	13.7068	15.3361	35.4528	21.7098	13.8281	17.7173	31.8772	26.5416	27.1821	21.3473	18.5171	22.0042
T_37279_c0_g1	gi|947106806|gb|KRH55189.1| hypothetical protein GLYMA_06G236100 [Glycine max] 6.6e-170	GO:0043248, proteasome assembly	-	25.5441	20.5223	23.1961	9.32842	11.5007	12.7184	15.8152	15.8133	12.8094	10.8164	14.045	10.9611	8.36355	7.57824	10.5035	14.1524	12.0866	16.9007
T_37281_c0_g2	gi|734416122|gb|KHN38050.1| Galactoside 2-alpha-L-fucosyltransferase [Glycine soja] 5.7e-23	GO:0008107, galactoside 2-alpha-L-fucosyltransferase activity;GO:0016021, integral component of membrane;GO:0042546, cell wall biogenesis	-	18.5384	13.6719	15.1304	8.14413	12.7542	9.89398	8.05884	9.55737	6.90833	9.88334	10.6661	6.43602	6.80255	4.74863	6.26343	9.49476	9.07627	11.8889
T_37293_c0_g1	gi|734426789|gb|KHN43909.1| Putative membrane protein [Glycine soja] 6.8e-171	GO:0000139, Golgi membrane;GO:0005464, UDP-xylose transmembrane transporter activity;GO:0005768, endosome;GO:0005794, Golgi apparatus;GO:0005802, trans-Golgi network;GO:0015790, UDP-xylose transmembrane transport;GO:0016021, integral component of membrane	-	4.72937	7.05436	7.55402	0.855963	1.65657	2.40246	1.33515	1.31369	2.11924	1.45889	4.00537	6.07364	2.44325	1.49495	2.42676	1.79555	2.40272	2.42951
T_37305_c0_g1	gi|356553371|ref|XP_003545030.1| PREDICTED: endoplasmin homolog isoform X1 [Glycine max] 1.1e-144	GO:0005524, ATP binding;GO:0005788, endoplasmic reticulum lumen;GO:0006457, protein folding;GO:0006950, response to stress	K09487-ko04141 Protein processing in endoplasmic reticulum;ko04151 PI3K-Akt signaling pathway	71.6976	38.4821	27.4352	13.6403	16.444	29.7382	20.7094	21.1789	15.0032	9.21576	14.8715	13.7334	12.5189	12.0662	14.0872	19.7162	27.8704	42.1218
T_37310_c0_g1	gi|734381212|gb|KHN23114.1| GEM-like protein 4 [Glycine soja] 1.6e-109	-	-	12.5159	6.29032	10.6293	1.21203	2.17765	4.75743	2.16459	3.45287	2.79843	1.04015	1.69791	2.15002	3.83184	3.00746	1.81292	3.18687	3.22302	4.25457
T_37313_c0_g1	gi|356533273|ref|XP_003535190.1| PREDICTED: polycomb group protein EMBRYONIC FLOWER 2-like isoform X1 [Glycine max] 1.8e-289	GO:0003677, DNA binding;GO:0003700, DNA binding transcription factor activity;GO:0005634, nucleus;GO:0006349, regulation of gene expression by genetic imprinting;GO:0006351, transcription, DNA-templated;GO:0009908, flower development;GO:0009910, negative regulation of flower development;GO:0030154, cell differentiation;GO:0046872, metal ion binding	-	8.90432	6.4424	3.81978	3.06667	2.77903	5.53027	4.34093	3.18863	1.85926	2.16225	1.7965	2.33743	2.2765	1.82595	1.81802	3.41779	3.2507	7.27596
T_37327_c0_g1	gi|1012333182|gb|KYP44585.1| Retrovirus-related Pol polyprotein from transposon TNT 1-94 [Cajanus cajan] 3.1e-10	GO:0003676, nucleic acid binding;GO:0008270, zinc ion binding	-	1.82194	0.966747	0.801569	10.8586	6.52203	2.36697	12.5404	14.711	10.8833	23.7634	10.6135	1.79635	16.6231	30.2281	17.9395	40.2086	19.2688	22.4025
T_37331_c0_g2	gi|947127010|gb|KRH74864.1| hypothetical protein GLYMA_01G047800 [Glycine max] 5.1e-41	-	-	5.79339	6.17029	4.31943	0.54212	2.35877	1.21796	1.63044	3.2611	1.64297	2.38706	4.69415	2.604	2.64361	1.31019	2.55176	6.75672	1.94837	4.9282
T_37339_c0_g1	gi|356519433|ref|XP_003528377.1| PREDICTED: F-box/kelch-repeat protein At1g80440-like [Glycine max] 7.1e-196	GO:0005829, cytosol;GO:0019005, SCF ubiquitin ligase complex;GO:0080037, negative regulation of cytokinin-activated signaling pathway;GO:2000762, regulation of phenylpropanoid metabolic process	-	7.60587	7.27719	9.21764	21.0906	14.0277	9.41829	16.4259	22.8703	17.2562	30.6871	12.4554	11.5496	25.9277	55.6318	23.0698	39.7929	16.4714	12.6771
T_37372_c0_g1	gi|356563459|ref|XP_003549980.1| PREDICTED: plant intracellular Ras-group-related LRR protein 5-like [Glycine max] 3.2e-257	GO:0009416, response to light stimulus	-	14.6696	11.778	12.3021	26.6084	27.6687	12.5004	32.7489	42.9928	25.1013	42.4244	30.918	10.3969	31.5394	42.4328	40.3295	71.7149	26.9073	39.0508
T_37372_c0_g2	gi|571435245|ref|XP_006573419.1| PREDICTED: auxin-responsive protein SAUR36-like [Glycine max] 3.4e-69	GO:0005634, nucleus;GO:0007275, multicellular organism development;GO:0009733, response to auxin;GO:0009734, auxin-activated signaling pathway;GO:0010029, regulation of seed germination;GO:0040008, regulation of growth;GO:1900057, positive regulation of leaf senescence	K14488-ko04075 Plant hormone signal transduction	9.97398	18.9625	21.1554	12.0046	22.1783	13.5958	36.0979	35.7273	31.5012	35.8493	31.3304	17.2091	32.659	48.8254	28.3342	42.4012	31.4627	24.1388
T_37405_c0_g1	gi|356543028|ref|XP_003539965.1| PREDICTED: transcription factor bHLH30-like [Glycine max] 6.3e-121	GO:0003677, DNA binding;GO:0003700, DNA binding transcription factor activity;GO:0005634, nucleus;GO:0006351, transcription, DNA-templated;GO:0006355, regulation of transcription, DNA-templated	-	3.24978	3.39477	2.89465	5.48076	7.30391	4.64865	15.8413	13.4458	4.2133	5.82904	7.84393	4.76759	5.92657	7.17925	20.9247	1.67853	1.26304	3.25394
T_37406_c0_g1	gi|571445952|ref|XP_003520610.2| PREDICTED: probable LRR receptor-like serine/threonine-protein kinase At4g08850 [Glycine max] 1.9e-120	GO:0004672, protein kinase activity;GO:0004674, protein serine/threonine kinase activity;GO:0005524, ATP binding;GO:0005886, plasma membrane;GO:0009506, plasmodesma;GO:0016020, membrane;GO:0016021, integral component of membrane;GO:0090406, pollen tube	-	4.26587	2.84481	5.67267	2.90105	3.07642	3.04028	17.3585	7.71778	5.18247	6.49879	10.2644	2.40927	5.08334	6.18676	7.13546	14.8205	11.4577	6.71457
T_37409_c0_g1	gi|356500894|ref|XP_003519265.1| PREDICTED: uncharacterized protein At2g40430-like [Glycine max] 1.7e-146	-	-	26.055	12.6097	8.25919	5.31668	4.38506	9.32594	5.39968	7.23901	6.06621	3.40891	5.89548	3.66455	3.14949	2.40129	4.79132	3.31761	3.60295	4.85524
T_37414_c0_g1	gi|734352510|gb|KHN13147.1| Proteinase inhibitor [Glycine soja] 1.7e-27	GO:0004867, serine-type endopeptidase inhibitor activity;GO:0009611, response to wounding	-	1.96503	3.77171	2.18325	16.7839	7.90824	3.51032	12.8308	15.1272	6.27616	19.3729	5.22224	0.921717	5.21296	28.2492	1.11341	80.0359	26.1485	17.9905
T_37418_c0_g1	gi|356510322|ref|XP_003523888.1| PREDICTED: cytochrome P450 82C4-like [Glycine max] 1.3e-276	GO:0004497, monooxygenase activity;GO:0005506, iron ion binding;GO:0016020, membrane;GO:0016021, integral component of membrane;GO:0016709, oxidoreductase activity, acting on paired donors, with incorporation or reduction of molecular oxygen, NAD(P)H as one donor, and incorporation of one atom of oxygen;GO:0020037, heme binding;GO:0044550, secondary metabolite biosynthetic process;GO:0071281, cel…	-	0.659499	0.496692	0.348926	0.472044	0.682591	0.591378	0.949499	0.355861	1.07525	0.214228	1.77669	0.744037	6.01173	0.65029	16.6629	0.183317	0.787197	1.16741
T_37434_c0_g1	gi|955350335|ref|XP_014619497.1| PREDICTED: protein FAR1-RELATED SEQUENCE 6 isoform X1 [Glycine max] 1.6e-139	GO:0005634, nucleus;GO:0006355, regulation of transcription, DNA-templated;GO:0008270, zinc ion binding	-	15.3557	9.93618	7.91687	3.98883	3.52135	5.73787	5.13152	4.89404	4.41552	3.36152	5.07779	3.4729	4.12054	3.74274	3.38144	5.39825	3.93547	7.32966
T_37459_c0_g1	gi|356573532|ref|XP_003554912.1| PREDICTED: UDP-glycosyltransferase 83A1 [Glycine max] 4.4e-250	GO:0009813, flavonoid biosynthetic process;GO:0043231, intracellular membrane-bounded organelle;GO:0052696, flavonoid glucuronidation;GO:0080043, quercetin 3-O-glucosyltransferase activity;GO:0080044, quercetin 7-O-glucosyltransferase activity	-	8.3374	7.04739	6.26916	1.56495	8.59118	4.69288	3.26826	3.03316	3.65237	2.60577	6.63321	5.26255	2.69055	2.70931	3.72569	3.00978	4.33879	6.02417
T_37502_c0_g1	gi|734416324|gb|KHN38203.1| Formation of crista junctions protein 1 [Glycine soja] 6.6e-178	GO:0005743, mitochondrial inner membrane;GO:0016021, integral component of membrane	-	13.9617	12.4891	7.58139	4.19952	3.11463	9.1581	4.92865	5.79143	3.28095	3.45947	4.12728	4.54027	5.06873	4.01949	3.57326	4.53273	5.8947	13.2194
T_37505_c0_g2	gi|1012342625|gb|KYP53818.1| RING finger protein 141 family [Cajanus cajan] 3.9e-38	GO:0008270, zinc ion binding	-	23.2334	18.8619	12.9526	6.43243	7.41632	6.33761	12.1577	11.8632	7.21876	7.0491	9.60009	9.44979	7.78243	9.57511	8.81749	10.4339	6.17259	12.3575
T_37505_c0_g3	gi|1012352335|gb|KYP63523.1| RING finger protein 141 family [Cajanus cajan] 3.9e-121	GO:0004842, ubiquitin-protein transferase activity;GO:0008270, zinc ion binding;GO:0016020, membrane;GO:0051865, protein autoubiquitination	-	9.21793	4.58337	4.23587	1.83851	1.22843	2.37823	2.30138	3.00393	2.0937	2.4713	3.55834	3.29806	2.03958	4.1532	1.62387	3.91205	4.41797	4.32826
T_37549_c0_g1	gi|571552802|ref|XP_006603696.1| PREDICTED: uncharacterized protein LOC100780091 isoform X1 [Glycine max] 8.0e-89	GO:0006364, rRNA processing	-	22.6111	14.7312	10.4125	7.42606	6.4541	10.8994	7.33875	8.23755	6.37383	4.45118	6.86935	6.28004	6.01608	6.15072	5.90985	4.04947	8.92787	8.54534
T_37555_c0_g1	gi|356546920|ref|XP_003541868.1| PREDICTED: uncharacterized protein LOC100779759 [Glycine max] 1.3e-43	-	-	8.26708	6.05074	6.50574	6.44716	7.34871	3.38103	10.5551	14.5413	8.26842	7.91287	6.85981	6.1912	13.7624	17.678	18.8281	10.5839	7.92802	9.44321
T_37588_c0_g2	gi|955381563|ref|XP_014625649.1| PREDICTED: uncharacterized protein LOC106796786 [Glycine max] 1.3e-61	GO:0048364, root development	-	12.8912	10.967	11.8428	8.02866	9.58853	28.8455	11.6516	8.54377	2.67214	2.30657	5.95178	4.27112	3.10517	1.77187	5.14816	1.54068	4.73073	6.13731
T_37592_c0_g1	gi|356563005|ref|XP_003549757.1| PREDICTED: CBL-interacting serine/threonine-protein kinase 24 [Glycine max] 5.6e-246	GO:0004674, protein serine/threonine kinase activity;GO:0005524, ATP binding;GO:0005634, nucleus;GO:0005737, cytoplasm;GO:0006468, protein phosphorylation;GO:0007165, signal transduction;GO:0035556, intracellular signal transduction	-	16.2413	10.8277	7.0902	5.20107	5.34948	6.31826	5.02369	7.30497	3.42503	4.48731	7.1527	5.22248	4.44797	4.07303	4.11353	4.55707	8.38769	7.66603
T_37631_c0_g2	gi|734413116|gb|KHN36561.1| Cysteine-rich repeat secretory protein 38 [Glycine soja] 1.6e-125	GO:0005576, extracellular region;GO:0005618, cell wall;GO:0005773, vacuole;GO:0009737, response to abscisic acid	-	0.334176	2.09107	1.15839	15.1362	15.7663	7.13007	8.18146	33.9835	2.19873	11.4725	4.77027	0.688202	2.40734	3.38059	2.98347	7.1322	3.81429	3.00162
T_37636_c0_g1	gi|356538305|ref|XP_003537644.1| PREDICTED: L-ascorbate peroxidase 3, peroxisomal [Glycine max] 1.9e-139	GO:0004601, peroxidase activity;GO:0005739, mitochondrion;GO:0005773, vacuole;GO:0005774, vacuolar membrane;GO:0005777, peroxisome;GO:0005778, peroxisomal membrane;GO:0006979, response to oxidative stress;GO:0009506, plasmodesma;GO:0009507, chloroplast;GO:0009514, glyoxysome;GO:0009536, plastid;GO:0009735, response to cytokinin;GO:0009941, chloroplast envelope;GO:0016021, integral component of me…	K00434-ko00480 Glutathione metabolism;ko00053 Ascorbate and aldarate metabolism	30.7098	18.911	16.0619	2.45964	8.81761	11.1741	6.75849	5.5307	5.26591	4.45347	3.4998	6.58663	9.56114	4.70098	5.44733	4.06129	9.2926	12.9811
T_37637_c0_g1	gi|947053773|gb|KRH03226.1| hypothetical protein GLYMA_17G085100 [Glycine max] 0.0e+00	GO:0000293, ferric-chelate reductase activity;GO:0005739, mitochondrion;GO:0005886, plasma membrane;GO:0006811, ion transport;GO:0016021, integral component of membrane;GO:0016491, oxidoreductase activity;GO:0031966, mitochondrial membrane;GO:0046872, metal ion binding	-	29.1492	25.7785	21.7592	16.2508	6.26204	5.93828	18.5573	21.1611	3.46222	9.23331	13.9907	13.7266	9.80879	9.74007	13.9558	14.7057	13.9851	17.005
T_37646_c0_g1	gi|947123246|gb|KRH71452.1| hypothetical protein GLYMA_02G148900 [Glycine max] 4.9e-185	GO:0001046, core promoter sequence-specific DNA binding;GO:0001228, transcriptional activator activity, RNA polymerase II transcription regulatory region sequence-specific DNA binding;GO:0005634, nucleus;GO:0006366, transcription by RNA polymerase II	-	23.3529	16.8767	12.544	4.84011	6.85912	8.65203	8.61321	10.7791	7.31158	7.5518	11.2733	6.15925	6.08949	6.76359	8.91527	9.67481	11.2337	13.281
T_37649_c0_g2	gi|734351719|gb|KHN12908.1| hypothetical protein glysoja_029442 [Glycine soja] 1.5e-111	GO:0016021, integral component of membrane	-	30.0524	21.7801	12.3378	5.80319	8.09691	12.2512	9.92055	7.4297	8.24794	4.7837	9.04645	11.4709	8.2345	4.38128	5.61779	3.59392	17.2783	20.9461
T_37658_c0_g1	gi|734387710|gb|KHN25473.1| Extended synaptotagmin-2-A [Glycine soja] 1.6e-105	GO:0005886, plasma membrane;GO:0006897, endocytosis;GO:0008289, lipid binding;GO:0010008, endosome membrane;GO:0016021, integral component of membrane;GO:0016032, viral process;GO:0046872, metal ion binding	-	67.5484	52.8548	48.2825	20.5203	30.8782	36.7516	30.6436	32.1444	17.8705	20.1053	23.7358	22.3927	23.5152	18.4242	22.0978	27.917	34.0905	53.936
T_37666_c0_g1	gi|351725217|ref|NP_001235549.1| gamma-glutamyl hydrolase precursor [Glycine max] 7.9e-118	GO:0005615, extracellular space;GO:0005618, cell wall;GO:0006541, glutamine metabolic process;GO:0008242, omega peptidase activity;GO:0034722, gamma-glutamyl-peptidase activity	K01307-ko00790 Folate biosynthesis	67.0201	102.956	111.342	47.8948	70.5367	73.041	32.034	27.5926	40.3504	31.2677	57.2656	81.8298	39.4751	23.8659	23.213	24.0434	36.9165	43.7061
T_37679_c0_g1	gi|571557795|ref|XP_006604471.1| PREDICTED: peptidyl-prolyl cis-trans isomerase CYP63 isoform X2 [Glycine max] 2.6e-82	GO:0003755, peptidyl-prolyl cis-trans isomerase activity;GO:0006457, protein folding;GO:0008380, RNA splicing;GO:0016607, nuclear speck	-	32.4362	28.2443	18.2556	17.747	16.5631	19.2683	14.9163	14.1008	11.6185	9.28544	12.8893	13.2924	12.8345	9.8982	10.484	14.2744	17.5964	29.0756
T_37692_c0_g1	gi|571488744|ref|XP_006591021.1| PREDICTED: uncharacterized protein LOC100791613 [Glycine max] 5.4e-83	GO:0003735, structural constituent of ribosome;GO:0005762, mitochondrial large ribosomal subunit;GO:0005840, ribosome;GO:0006412, translation	K02902-ko03010 Ribosome	21.9624	12.1592	9.69071	5.44726	8.25125	8.57188	5.62907	7.81469	3.25199	3.74766	5.62932	3.88696	5.37342	4.43664	3.17954	4.53732	7.59856	7.60971
T_37706_c0_g1	gi|593264924|ref|XP_007134640.1| hypothetical protein PHAVU_010G064100g [Phaseolus vulgaris] 9.7e-13	-	-	80.156	35.2189	22.0312	12.3216	12.4566	18.7358	17.334	21.5988	15.4131	15.0008	17.0693	12.8592	18.7464	14.0061	25.541	14.4183	17.1451	25.5187
T_37708_c0_g2	gi|965671699|dbj|BAT86306.1| hypothetical protein VIGAN_04394400 [Vigna angularis var. angularis] 2.5e-149	GO:0004842, ubiquitin-protein transferase activity;GO:0005634, nucleus;GO:0009585, red, far-red light phototransduction;GO:0010099, regulation of photomorphogenesis;GO:0048366, leaf development;GO:0048573, photoperiodism, flowering	-	3.95538	7.19076	4.98549	15.3205	7.90463	11.5965	10.3378	9.84557	9.89941	10.0683	7.89716	11.507	7.44919	8.36901	6.53941	9.76452	6.45945	8.77561
T_37713_c0_g2	gi|351721377|ref|NP_001237975.1| uncharacterized protein LOC100500687 [Glycine max] 4.1e-70	GO:0005509, calcium ion binding	-	21.8139	18.0868	19.6244	29.5704	34.6867	27.3091	16.7004	15.0461	24.2263	50.7638	13.7153	19.3953	27.2275	20.1198	9.87569	81.4857	62.028	41.1103
T_37733_c1_g1	gi|356551144|ref|XP_003543938.1| PREDICTED: alpha-1,4 glucan phosphorylase L isozyme, chloroplastic/amyloplastic [Glycine max] 0.0e+00	GO:0005737, cytoplasm;GO:0005975, carbohydrate metabolic process;GO:0005980, glycogen catabolic process;GO:0008184, glycogen phosphorylase activity;GO:0009501, amyloplast;GO:0009507, chloroplast;GO:0030170, pyridoxal phosphate binding	K00688-ko00500 Starch and sucrose metabolism	18.6967	11.5935	12.8646	7.00638	5.55015	7.50181	6.32923	8.83082	4.10907	3.77914	8.85816	4.84107	3.52806	2.14411	4.29352	7.58968	4.78046	7.51377
T_37750_c0_g1	gi|734423693|gb|KHN42312.1| hypothetical protein glysoja_020024 [Glycine soja] 1.3e-35	-	-	4.46434	3.98006	5.17901	8.35552	8.60847	3.08621	16.4087	12.0056	11.0718	16.5954	13.9667	2.39371	11.3929	13.9371	5.69426	50.3015	25.3159	28.319
T_37766_c0_g1	gi|734311698|gb|KHN00115.1| Nuclease PA3 [Glycine soja] 7.3e-158	GO:0003676, nucleic acid binding;GO:0004519, endonuclease activity;GO:0006308, DNA catabolic process;GO:0046872, metal ion binding	-	8.22107	5.2653	5.27103	1.94795	3.03034	3.8191	2.7738	3.70041	2.07046	2.34365	2.3229	1.8973	1.871	1.61052	1.69897	3.72152	3.5639	4.21878
T_37767_c0_g1	-	-	-	38.9355	27.8905	24.075	13.3661	20.5942	25.1526	14.5671	13.5188	14.6151	10.3024	14.5962	15.6077	14.7407	12.7244	7.85506	11.9916	15.3869	18.4576
T_37788_c0_g3	gi|356564394|ref|XP_003550439.1| PREDICTED: pumilio homolog 24 [Glycine max] 4.1e-163	GO:0003729, mRNA binding;GO:0005730, nucleolus;GO:0006417, regulation of translation	-	15.1416	11.2951	10.0969	6.71222	7.46593	10.081	7.88883	8.91632	4.54326	5.27006	6.08078	4.66467	3.81785	3.08636	5.64938	6.03691	5.00392	5.74156
T_37810_c0_g1	gi|734376678|gb|KHN21407.1| Hypothetical protein glysoja_042470 [Glycine soja] 2.2e-07	GO:0003824, catalytic activity;GO:0050662, coenzyme binding	-	2.09507	2.90528	5.00469	0.48377	2.18566	0.469384	2.73849	3.24857	2.16848	5.28438	4.35293	1.9372	1.70514	1.10812	1.36843	6.53164	7.5432	7.5748
T_37823_c0_g1	gi|359807359|ref|NP_001240869.1| uncharacterized protein LOC100788089 [Glycine max] 5.0e-50	GO:0006367, transcription initiation from RNA polymerase II promoter	K03137-ko03022 Basal transcription factors	12.1024	6.06386	6.01271	3.09076	2.67133	5.40224	3.76828	4.50296	2.01521	2.13178	2.72864	2.02092	1.71384	1.21311	2.09528	3.14047	3.73786	5.00207
T_37850_c0_g1	gi|1012337188|gb|KYP48469.1| hypothetical protein KK1_029844 [Cajanus cajan] 4.9e-84	GO:0005576, extracellular region;GO:0009611, response to wounding;GO:0009617, response to bacterium;GO:0009723, response to ethylene;GO:0009751, response to salicylic acid;GO:0009753, response to jasmonic acid;GO:0009814, defense response, incompatible interaction;GO:0080027, response to herbivore	K13449-ko04016 MAPK signaling pathway - plant;ko04075 Plant hormone signal transduction	1.12411	0.830668	0.859476	15.9645	14.9668	10.0715	13.2024	15.4113	14.3426	7.41393	2.94187	2.04988	8.25616	21.8435	4.34397	16.0261	8.25568	3.49976
T_37853_c0_g2	gi|356573936|ref|XP_003555110.1| PREDICTED: DNA-directed RNA polymerases I and III subunit RPAC2-like isoform X2 [Glycine max] 1.5e-52	GO:0003677, DNA binding;GO:0003899, DNA-directed 5'-3' RNA polymerase activity;GO:0005634, nucleus;GO:0005666, DNA-directed RNA polymerase III complex;GO:0005736, DNA-directed RNA polymerase I complex;GO:0006351, transcription, DNA-templated;GO:0006360, transcription by RNA polymerase I;GO:0006383, transcription by RNA polymerase III	K03020-ko00240 Pyrimidine metabolism;ko03020 RNA polymerase;ko00230 Purine metabolism	25.2623	18.4164	18.3619	10.5922	18.4351	18.745	14.8202	14.7282	9.22287	10.1497	8.77654	7.11937	8.85924	8.65327	5.08228	13.2887	12.7792	14.388
T_37873_c1_g2	gi|356521219|ref|XP_003529254.1| PREDICTED: uncharacterized protein LOC100789403 [Glycine max] 1.1e-161	-	-	24.2664	18.1747	13.5716	8.54671	8.52551	15.0134	9.84675	9.73852	6.71184	4.8757	7.79429	6.88657	6.90614	6.36318	8.35574	6.31752	8.00546	13.2986
T_37884_c0_g1	gi|955326006|ref|XP_006582269.2| PREDICTED: uncharacterized protein LOC100810607 isoform X1 [Glycine max] 1.9e-103	GO:0000209, protein polyubiquitination;GO:0004842, ubiquitin-protein transferase activity;GO:0005634, nucleus;GO:0005737, cytoplasm;GO:0005829, cytosol;GO:0008270, zinc ion binding;GO:0009414, response to water deprivation;GO:0009737, response to abscisic acid;GO:0009738, abscisic acid-activated signaling pathway;GO:0010200, response to chitin;GO:0016874, ligase activity;GO:0043161, proteasome-me…	-	14.07	7.53449	7.30671	2.56256	4.16648	4.23814	4.46918	2.95372	1.37274	1.91909	2.34451	3.29156	1.72329	1.31956	2.06114	2.60178	4.04757	6.81501
T_37909_c0_g1	gi|947053413|gb|KRH02866.1| hypothetical protein GLYMA_17G062900 [Glycine max] 7.2e-181	GO:0005634, nucleus;GO:0005913, cell-cell adherens junction;GO:0007155, cell adhesion;GO:0031252, cell leading edge;GO:0034451, centriolar satellite;GO:0035020, regulation of Rac protein signal transduction;GO:0035735, intraciliary transport involved in cilium assembly;GO:0036064, ciliary basal body;GO:2000145, regulation of cell motility	K06085-ko04520 Adherens junction	11.7596	9.98793	10.1629	4.94857	5.06078	7.86527	5.97713	5.46313	4.74917	3.55884	4.70882	5.85813	4.35929	3.378	4.37911	2.68731	5.11549	6.0099
T_37912_c0_g2	gi|356532926|ref|XP_003535020.1| PREDICTED: pre-mRNA-splicing factor CWC25 homolog [Glycine max] 3.4e-158	-	-	20.2252	7.97681	4.77394	5.10323	2.40966	5.62101	3.90488	3.766	2.3911	1.01588	3.131	2.68157	2.79167	2.82956	2.18039	3.86008	3.81793	6.0734
T_37916_c0_g1	gi|571480801|ref|XP_006588434.1| PREDICTED: uncharacterized protein LOC100784528 isoform X1 [Glycine max] 5.6e-202	-	-	12.1317	7.08507	5.98893	2.75163	3.77848	6.10463	6.16691	4.54249	3.26728	2.38413	3.16205	2.7698	2.97059	2.65877	3.85323	3.29604	3.95127	8.16845
T_37918_c0_g1	gi|356568441|ref|XP_003552419.1| PREDICTED: chlorophyll a-b binding protein CP29.3, chloroplastic-like [Glycine max] 7.3e-69	GO:0009416, response to light stimulus;GO:0009507, chloroplast;GO:0009522, photosystem I;GO:0009523, photosystem II;GO:0009534, chloroplast thylakoid;GO:0009535, chloroplast thylakoid membrane;GO:0009579, thylakoid;GO:0009637, response to blue light;GO:0009768, photosynthesis, light harvesting in photosystem I;GO:0009941, chloroplast envelope;GO:0010114, response to red light;GO:0010218, response…	-	8.67696	8.22188	5.86026	1.78169	1.56669	1.96126	3.45692	5.52982	2.17271	4.32885	4.22066	5.33481	4.07971	4.18715	4.45602	4.6842	3.86135	2.844
T_37939_c0_g1	gi|734364102|gb|KHN17085.1| Actin-related protein 2/3 complex subunit 1 [Glycine soja] 6.5e-190	GO:0005634, nucleus;GO:0005737, cytoplasm;GO:0005885, Arp2/3 protein complex;GO:0007015, actin filament organization;GO:0034314, Arp2/3 complex-mediated actin nucleation;GO:0051015, actin filament binding	K05757-ko04144 Endocytosis;ko04810 Regulation of actin cytoskeleton	11.9467	9.07555	7.56126	6.38976	4.35415	6.44618	6.04931	7.29582	3.136	4.12908	5.89143	3.46542	3.88069	4.09777	4.20322	6.16265	5.13897	6.98525
T_37943_c0_g1	-	GO:0003723, RNA binding;GO:0003968, RNA-directed 5'-3' RNA polymerase activity;GO:0004386, helicase activity;GO:0005524, ATP binding;GO:0006351, transcription, DNA-templated;GO:0006396, RNA processing;GO:0008174, mRNA methyltransferase activity;GO:0008234, cysteine-type peptidase activity;GO:0039694, viral RNA genome replication;GO:0046872, metal ion binding;GO:0051213, dioxygenase activity	-	806	609.769	1351.8	717.491	19.5633	463.202	654.241	660.069	201.764	33.9378	5.75223	798.892	630.059	168.071	4.59254	0.473402	35.6892	2.22267
T_37967_c0_g1	gi|955392217|ref|XP_014628070.1| PREDICTED: WAT1-related protein At5g07050-like [Glycine max] 5.4e-102	GO:0005886, plasma membrane;GO:0006810, transport;GO:0016021, integral component of membrane;GO:0022857, transmembrane transporter activity	-	34.7248	27.8744	21.3164	8.58163	6.86093	16.2779	16.6712	11.3268	7.69603	14.0267	11.1557	12.133	13.612	13.2235	21.262	12.4939	14.3103	17.4959
T_37976_c0_g1	gi|947086016|gb|KRH34737.1| hypothetical protein GLYMA_10G202600 [Glycine max] 2.9e-171	-	-	14.5019	9.02677	7.88552	4.13168	4.29494	4.35434	6.39688	8.48634	2.92267	2.70395	4.69947	2.74878	3.99171	2.2393	5.13819	5.64377	5.86369	9.41671
T_37981_c1_g1	gi|356571127|ref|XP_003553732.1| PREDICTED: uncharacterized protein LOC100811813 [Glycine max] 5.5e-113	GO:0005737, cytoplasm;GO:0016020, membrane;GO:0030001, metal ion transport;GO:0046914, transition metal ion binding;GO:0046916, cellular transition metal ion homeostasis	-	20.1709	13.7556	25.709	4.20439	4.6573	5.94382	10.3635	6.5369	4.59525	4.69429	10.9387	3.62217	4.93369	3.42566	7.27358	9.48616	13.1922	10.8672
T_37996_c0_g2	gi|734379280|gb|KHN22444.1| hypothetical protein glysoja_024953 [Glycine soja] 1.4e-68	-	-	13.6111	11.0218	10.3457	15.1424	8.80528	3.30883	10.6712	17.9609	3.14049	9.7441	11.7532	7.74971	3.67649	4.70179	6.78988	16.6784	3.25313	3.96496
T_38024_c0_g1	gi|593693668|ref|XP_007147355.1| hypothetical protein PHAVU_006G117100g [Phaseolus vulgaris] 7.0e-20	-	-	237.147	43.7537	148.59	28.2632	30.1968	11.8174	2.83368	40.2127	8.82581	5.3851	17.2808	96.1856	3.16235	2.68943	22.8217	15.0471	12.7675	6.63442
T_38037_c0_g1	gi|255635482|gb|ACU18093.1| unknown [Glycine max] 3.5e-76	GO:0008270, zinc ion binding	-	2.99537	2.58816	1.75771	14.508	6.00253	7.65731	10.0793	14.4898	8.82782	7.7242	3.09146	1.97723	8.75615	13.6448	7.96103	7.74977	2.30866	3.98772
T_38039_c0_g1	gi|571462592|ref|XP_006582327.1| PREDICTED: ELMO domain-containing protein A-like isoform X1 [Glycine max] 3.5e-79	GO:0005737, cytoplasm;GO:0006909, phagocytosis;GO:0006915, apoptotic process;GO:0016477, cell migration	-	12.3385	12.2137	9.38181	3.95169	5.21495	6.16608	5.5163	6.79749	3.30517	4.35459	3.89372	6.21666	5.59715	3.82376	3.05413	2.11056	4.90088	6.85187
T_38048_c0_g1	gi|734388965|gb|KHN26061.1| hypothetical protein glysoja_025159 [Glycine soja] 2.0e-28	-	-	25.4869	16.6	18.3286	13.7192	11.2232	10.0583	17.5339	16.7575	13.9708	30.0023	18.5929	8.19049	31.1259	31.8048	19.8819	52.7344	26.592	52.9688
T_38048_c0_g2	gi|255629990|gb|ACU15347.1| unknown [Glycine max] 6.1e-26	-	-	7.65697	6.58463	7.1552	11.1304	7.25613	6.25605	10.0414	9.19425	12.2975	21.1971	10.9977	4.56309	19.1274	25.5313	6.51491	37.441	13.1596	24.0613
T_38050_c0_g1	gi|255646673|gb|ACU23810.1| unknown [Glycine max] 1.6e-20	-	-	34.5863	21.4903	13.9748	9.13944	8.44955	14.4118	10.3182	8.13337	6.69346	7.64643	7.42849	8.35304	10.978	7.08401	6.04472	5.7674	8.04592	13.6205
T_38067_c1_g1	gi|734378303|gb|KHN21988.1| Aquaporin TIP1-3 [Glycine soja] 9.3e-133	GO:0005215, transporter activity;GO:0005887, integral component of plasma membrane;GO:0006833, water transport;GO:0009705, plant-type vacuole membrane;GO:0009992, cellular water homeostasis;GO:0015204, urea transmembrane transporter activity;GO:0015250, water channel activity;GO:0015254, glycerol channel activity;GO:0015840, urea transport;GO:0016021, integral component of membrane;GO:0034220, io…	-	10.9106	20.3688	9.42851	1.93126	4.9285	3.33773	1.48752	1.91179	5.25154	3.06098	21.2772	12.5873	4.33581	3.99448	5.80571	2.64208	14.8068	26.6893
T_38067_c1_g3	gi|734397445|gb|KHN30200.1| Aquaporin TIP1-3 [Glycine soja] 2.0e-133	GO:0005215, transporter activity;GO:0005887, integral component of plasma membrane;GO:0006833, water transport;GO:0009705, plant-type vacuole membrane;GO:0009992, cellular water homeostasis;GO:0015204, urea transmembrane transporter activity;GO:0015250, water channel activity;GO:0015254, glycerol channel activity;GO:0015840, urea transport;GO:0016021, integral component of membrane;GO:0034220, io…	-	12.9619	27.835	18.6337	1.08488	1.57253	3.41874	0.960053	0.980131	2.27673	0.792936	5.57023	10.9505	4.62786	2.34335	2.84653	6.40457	24.358	26.1168
T_38077_c0_g1	gi|356532111|ref|XP_003534617.1| PREDICTED: probable galacturonosyltransferase 7 [Glycine max] 0.0e+00	GO:0000139, Golgi membrane;GO:0005768, endosome;GO:0005794, Golgi apparatus;GO:0005802, trans-Golgi network;GO:0016021, integral component of membrane;GO:0045489, pectin biosynthetic process;GO:0047262, polygalacturonate 4-alpha-galacturonosyltransferase activity;GO:0071555, cell wall organization	K13648-ko00520 Amino sugar and nucleotide sugar metabolism;ko00500 Starch and sucrose metabolism	7.71536	5.90379	5.84849	2.94098	4.11574	6.8199	3.91132	4.05001	3.22242	3.08313	3.44321	2.72493	2.93682	2.10276	2.7465	1.87808	3.62177	5.60871
T_38079_c0_g1	gi|571495091|ref|XP_006593046.1| PREDICTED: uncharacterized protein LOC102662440 [Glycine max] 4.1e-06	GO:0003676, nucleic acid binding;GO:0005525, GTP binding;GO:0005622, intracellular;GO:0007264, small GTPase mediated signal transduction	-	2.45036	3.34829	3.58239	3.07733	3.53529	4.96044	4.40668	5.40356	5.46182	6.40774	3.79868	3.99118	7.47127	10.106	4.93083	5.93168	5.84201	4.87967
T_38086_c0_g1	gi|734361767|gb|KHN15741.1| Homocysteine S-methyltransferase 3 [Glycine soja] 7.1e-179	GO:0005886, plasma membrane;GO:0008168, methyltransferase activity;GO:0009086, methionine biosynthetic process;GO:0046872, metal ion binding	K00547-ko00270 Cysteine and methionine metabolism	50.0436	40.9456	45.6316	17.7919	17.027	11.8106	21.5104	24.8574	11.6439	14.2968	18.6546	14.1351	15.3945	15.7462	19.1693	32.2028	24.1391	27.085
T_38106_c0_g1	gi|356543614|ref|XP_003540255.1| PREDICTED: leucine-rich repeat-containing protein ODA7 [Glycine max] 2.5e-192	GO:0005634, nucleus	-	9.31875	4.21325	3.01012	1.32688	1.40355	3.21985	4.5974	2.34029	2.89356	1.6582	1.59851	1.33412	1.20896	1.45274	1.61649	1.57343	2.16014	2.28685
T_38115_c0_g1	gi|571434591|ref|XP_006573238.1| PREDICTED: protein NRT1/ PTR FAMILY 3.1 [Glycine max] 1.0e-258	GO:0005215, transporter activity;GO:0016021, integral component of membrane;GO:0042128, nitrate assimilation	-	10.1422	13.6175	13.9023	55.7671	28.5304	35.1153	18.432	27.528	19.1166	29.9241	23.5095	13.8207	16.1635	16.8004	15.1412	19.0369	7.07132	7.95658
T_38116_c0_g1	gi|1012355820|gb|KYP67007.1| RNA polymerase sigma factor rpoD [Cajanus cajan] 2.2e-288	GO:0001053, plastid sigma factor activity;GO:0003677, DNA binding;GO:0003700, DNA binding transcription factor activity;GO:0006352, DNA-templated transcription, initiation;GO:0009507, chloroplast;GO:0009536, plastid;GO:0016987, bacterial sigma factor activity;GO:0045893, positive regulation of transcription, DNA-templated;GO:0071482, cellular response to light stimulus;GO:0071483, cellular respon…	-	7.37655	4.70229	3.31492	1.65881	5.31844	3.08418	4.0008	3.43158	1.92575	1.25829	1.97393	2.07138	1.83057	1.97994	2.92842	1.68929	2.79496	4.20475
T_38137_c1_g2	gi|947068875|gb|KRH17766.1| hypothetical protein GLYMA_13G013900 [Glycine max] 1.1e-36	-	-	4382.32	1004.6	1620.21	884.111	326.435	1785.42	750.885	500.87	544.012	1108.07	1168.88	2183.4	3758.27	801.59	843.787	696.721	1087.53	1379.42
T_38156_c0_g2	gi|358248291|ref|NP_001239856.1| uncharacterized protein LOC100795179 precursor [Glycine max] 6.7e-113	-	-	8.53075	8.08698	6.78038	2.59652	3.53112	5.94826	4.05841	4.17849	3.51055	4.1669	4.16996	4.70368	2.87625	2.51941	1.3678	3.62364	3.49651	5.65021
T_38158_c3_g1	gi|351722279|ref|NP_001235191.1| uncharacterized protein LOC100500240 [Glycine max] 9.8e-31	GO:0043248, proteasome assembly	-	7.71171	6.12139	8.13823	2.6306	3.1444	5.05817	5.05896	3.01467	1.23801	2.6731	1.87779	2.50167	2.21276	2.15997	1.78568	2.34785	3.53244	4.2152
T_38178_c0_g1	gi|593781803|ref|XP_007153942.1| hypothetical protein PHAVU_003G078300g [Phaseolus vulgaris] 1.5e-87	-	-	13.5665	10.1952	10.2325	15.3964	12.426	14.0594	20.6126	31.9131	7.88447	32.937	22.2169	19.9518	20.8404	33.1296	40.6578	25.3431	11.1946	14.3507
T_38181_c0_g1	gi|734425662|gb|KHN43339.1| Hypothetical protein glysoja_001922 [Glycine soja] 7.4e-197	GO:0003756, protein disulfide isomerase activity;GO:0005783, endoplasmic reticulum;GO:0005788, endoplasmic reticulum lumen;GO:0016853, isomerase activity;GO:0045454, cell redox homeostasis	K09584-ko04141 Protein processing in endoplasmic reticulum	27.5206	23.1409	23.3609	16.283	24.2243	23.5967	18.6795	16.7214	14.9103	13.8164	11.7559	14.1994	14.5698	10.397	10.3978	13.9184	14.9712	13.9901
T_38184_c0_g1	gi|356574438|ref|XP_003555354.1| PREDICTED: xyloglucan galactosyltransferase KATAMARI1 homolog [Glycine max] 7.5e-263	GO:0000139, Golgi membrane;GO:0005794, Golgi apparatus;GO:0008378, galactosyltransferase activity;GO:0009969, xyloglucan biosynthetic process;GO:0016021, integral component of membrane	-	9.47769	16.0699	29.2207	6.4804	7.68314	4.70718	13.4176	8.8731	7.53283	11.129	17.9177	19.2258	11.0189	10.6274	11.624	21.0193	17.6518	9.41621
T_38200_c0_g1	gi|955373265|ref|XP_003547193.2| PREDICTED: girdin-like [Glycine max] 1.8e-207	-	-	12.7636	9.20064	6.46945	2.59177	2.71713	5.07793	5.07549	4.90905	2.89692	2.38997	5.56108	4.35574	3.48309	2.82684	4.30546	2.83762	3.36593	5.51731
T_38205_c0_g1	gi|920715594|gb|KOM55682.1| hypothetical protein LR48_Vigan10g157400 [Vigna angularis] 2.2e-129	GO:0004674, protein serine/threonine kinase activity;GO:0004683, calmodulin-dependent protein kinase activity;GO:0005516, calmodulin binding;GO:0005524, ATP binding;GO:0005634, nucleus;GO:0005737, cytoplasm;GO:0005886, plasma membrane;GO:0009416, response to light stimulus;GO:0009738, abscisic acid-activated signaling pathway;GO:0009931, calcium-dependent protein serine/threonine kinase activity;…	-	21.6636	33.9233	17.1154	23.3143	22.7261	19.7904	23.3934	28.2541	39.6821	39.3568	70.615	61.4615	43.2125	64.9165	117.826	26.6008	33.2094	44.6527
T_38224_c0_g1	gi|356497743|ref|XP_003517718.1| PREDICTED: polygalacturonase At1g48100-like [Glycine max] 1.5e-231	GO:0004650, polygalacturonase activity;GO:0005576, extracellular region;GO:0005618, cell wall;GO:0005975, carbohydrate metabolic process;GO:0071555, cell wall organization	K01213-ko00040 Pentose and glucuronate interconversions;ko00500 Starch and sucrose metabolism	23.4315	16.5939	7.9015	3.34909	6.2288	12.238	5.31698	3.0735	4.95467	4.37438	6.96822	14.4852	9.63426	4.07898	5.8927	0.925002	7.02602	4.59241
T_38232_c0_g1	gi|356569400|ref|XP_003552889.1| PREDICTED: ankyrin repeat domain-containing protein EMB506, chloroplastic-like [Glycine max] 1.4e-77	GO:0009507, chloroplast	-	10.4761	6.4363	4.20133	2.78392	1.72078	4.39611	2.6133	4.27118	1.85815	1.63699	2.98141	2.98882	2.7799	1.84345	2.88307	3.00229	2.0925	4.86253
T_38233_c0_g1	gi|571477885|ref|XP_003533272.2| PREDICTED: uncharacterized protein At5g08430-like [Glycine max] 4.6e-273	GO:0003677, DNA binding	-	17.65	4.87524	4.43133	2.10884	1.85008	2.21557	3.50492	3.9032	2.52275	2.13877	1.1247	1.44406	2.55092	3.38255	2.5587	1.16803	2.16752	3.729
T_38234_c0_g1	gi|356572249|ref|XP_003554282.1| PREDICTED: poly [ADP-ribose] polymerase 1-like isoform X1 [Glycine max] 0.0e+00	GO:0003677, DNA binding;GO:0003910, DNA ligase (ATP) activity;GO:0003950, NAD+ ADP-ribosyltransferase activity;GO:0005634, nucleus;GO:0005737, cytoplasm;GO:0006273, lagging strand elongation;GO:0006281, DNA repair;GO:0006471, protein ADP-ribosylation;GO:0006979, response to oxidative stress;GO:0008270, zinc ion binding;GO:0009737, response to abscisic acid;GO:0051103, DNA ligation involved in DNA…	K10798-ko04210 Apoptosis;ko03410 Base excision repair;ko04214 Apoptosis - fly	8.0969	6.9711	5.19149	2.38102	1.83511	4.56921	3.50781	3.25728	2.03881	2.10393	2.8392	2.79691	2.39092	2.44094	2.30346	2.12924	2.97171	5.1482
T_38237_c0_g2	gi|734401490|gb|KHN31677.1| DNA-directed RNA polymerases I and III subunit RPAC1 [Glycine soja] 3.8e-204	GO:0003677, DNA binding;GO:0003899, DNA-directed 5'-3' RNA polymerase activity;GO:0005666, DNA-directed RNA polymerase III complex;GO:0005736, DNA-directed RNA polymerase I complex;GO:0006351, transcription, DNA-templated;GO:0006360, transcription by RNA polymerase I;GO:0006383, transcription by RNA polymerase III	K03027-ko00230 Purine metabolism;ko00240 Pyrimidine metabolism;ko03020 RNA polymerase	13.7204	8.12884	5.11202	4.91007	4.06866	5.74805	4.72914	4.99802	3.02677	3.67089	2.61532	2.96112	2.60812	1.84099	2.63127	3.06008	2.92055	4.32365
T_38245_c0_g3	gi|965664344|dbj|BAT80053.1| hypothetical protein VIGAN_02301500 [Vigna angularis var. angularis] 4.4e-69	GO:0005777, peroxisome;GO:0009507, chloroplast;GO:0009570, chloroplast stroma	-	9.15917	15.0992	19.6732	9.95635	12.8458	9.64559	21.9487	14.9125	24.2755	14.4764	19.7218	11.9897	11.2321	19.3612	17.5412	34.9854	31.572	28.4487
T_38254_c0_g1	gi|356560877|ref|XP_003548713.1| PREDICTED: mechanosensitive ion channel protein 10-like [Glycine max] 6.5e-298	GO:0005886, plasma membrane;GO:0006820, anion transport;GO:0008381, mechanosensitive ion channel activity;GO:0010150, leaf senescence;GO:0016021, integral component of membrane;GO:0050982, detection of mechanical stimulus;GO:0097468, programmed cell death in response to reactive oxygen species	-	18.568	21.2933	18.492	4.8182	4.80022	6.19781	5.40881	3.97547	6.79935	3.03539	12.945	11.4824	6.34828	3.0006	9.6458	1.89151	7.85433	8.11724
T_38257_c7_g1	gi|1012322288|gb|KYP34623.1| Copper transport protein ATOX1 [Cajanus cajan] 8.7e-39	GO:0000785, chromatin;GO:0005829, cytosol;GO:0006825, copper ion transport;GO:0030001, metal ion transport;GO:0046872, metal ion binding	-	430.082	395.488	649.697	201.435	228.01	231.059	273.021	220.613	168.744	441.806	204.419	267.245	237.56	298.471	407.136	258.756	334.74	460.62
T_38261_c1_g1	gi|1012328298|gb|KYP39949.1| Menaquinone biosynthesis methyltransferase ubiE, partial [Cajanus cajan] 5.8e-131	GO:0005737, cytoplasm;GO:0008757, S-adenosylmethionine-dependent methyltransferase activity;GO:0016021, integral component of membrane;GO:0032259, methylation	-	7.14357	8.4032	8.98032	2.42039	3.38874	4.47549	7.16689	6.75197	4.04844	7.61553	5.24672	4.83026	5.97698	11.5392	5.72166	6.28732	9.20897	6.74726
T_38268_c0_g1	gi|356545841|ref|XP_003541342.1| PREDICTED: 1-aminocyclopropane-1-carboxylate oxidase homolog 1-like [Glycine max] 4.5e-184	GO:0016491, oxidoreductase activity;GO:0046872, metal ion binding;GO:0051213, dioxygenase activity	-	2.17485	2.13267	1.1712	2.17156	3.8351	1.35142	4.54461	10.1876	3.86265	8.82037	3.84326	3.2212	6.08322	8.86608	2.13357	9.16816	6.84412	4.89503
T_38273_c0_g1	gi|734346790|gb|KHN11133.1| Lachrymatory-factor synthase [Glycine soja] 1.7e-66	GO:0005773, vacuole	-	6.14753	4.54698	3.86865	8.56437	9.93874	6.21928	6.42209	7.66988	7.47856	7.83205	5.85031	5.89835	8.20809	11.5841	11.9801	10.6245	5.91551	8.16276
T_38305_c0_g1	gi|734437841|gb|KHN48766.1| hypothetical protein glysoja_049999 [Glycine soja] 3.0e-47	GO:0009852, auxin catabolic process;GO:0046872, metal ion binding;GO:0051213, dioxygenase activity	-	30.7682	33.7488	55.5502	17.9385	29.1238	32.3008	22.5193	14.344	14.756	13.0645	29.4461	21.8375	22.6557	7.33594	10.128	17.6785	18.714	24.1943
T_38308_c0_g1	gi|1012336020|gb|KYP47332.1| hypothetical protein KK1_031015 [Cajanus cajan] 1.4e-42	GO:0005768, endosome;GO:0031083, BLOC-1 complex	-	8.85934	10.8988	6.62184	3.07966	3.41996	4.48135	5.58056	5.04511	3.04184	3.40054	5.33839	3.06412	2.57555	2.81248	3.77916	2.79262	3.69297	8.33924
T_38320_c1_g2	gi|1012355179|gb|KYP66366.1| putative mannitol dehydrogenase [Cajanus cajan] 5.5e-25	GO:0005737, cytoplasm;GO:0008270, zinc ion binding;GO:0045551, cinnamyl-alcohol dehydrogenase activity;GO:0046029, mannitol dehydrogenase activity;GO:0052747, sinapyl alcohol dehydrogenase activity	-	1.20431	0.228013	0.563347	2.58324	1.60408	6.48496	1.87446	2.94238	0.275756	8.16913	1.30123	0.951403	2.44644	14.4699	0.478691	11.3876	3.79576	4.17822
T_38322_c0_g1	gi|358248856|ref|NP_001239696.1| uncharacterized protein LOC100778253 [Glycine max] 5.9e-179	GO:0009718, anthocyanin-containing compound biosynthetic process;GO:0045552, dihydrokaempferol 4-reductase activity;GO:0050662, coenzyme binding	K13082-ko00941 Flavonoid biosynthesis	5.46048	5.01715	2.81602	17.3685	29.2504	19.1687	30.7858	43.212	32.6318	23.0903	9.99915	5.48405	22.9415	20.8804	30.001	22.5163	16.899	21.5967
T_38330_c0_g1	gi|947105595|gb|KRH53978.1| hypothetical protein GLYMA_06G158600 [Glycine max] 6.2e-164	GO:0000932, P-body;GO:0005634, nucleus;GO:0005737, cytoplasm;GO:0016779, nucleotidyltransferase activity;GO:0050265, RNA uridylyltransferase activity;GO:0060964, regulation of gene silencing by miRNA;GO:0071076, RNA 3' uridylation	-	6.84285	6.7566	2.95592	2.77187	2.10658	2.44261	2.84759	2.95721	1.63419	1.64169	2.7374	1.89013	1.69472	1.37476	1.69788	5.00473	2.86117	3.4968
T_38347_c0_g1	gi|571484903|ref|XP_006589686.1| PREDICTED: VQ motif-containing protein 8, chloroplastic-like [Glycine max] 3.6e-78	GO:0009507, chloroplast	-	0.814672	2.37792	3.4996	3.79915	6.64789	2.33094	12.827	7.44045	9.19241	12.3326	8.81358	0.845838	10.2385	7.30301	10.9056	29.9379	16.0725	19.9031
T_38349_c0_g1	gi|947115491|gb|KRH63793.1| hypothetical protein GLYMA_04G197600 [Glycine max] 1.3e-68	GO:0005783, endoplasmic reticulum;GO:0005794, Golgi apparatus;GO:0006950, response to stress;GO:0009737, response to abscisic acid;GO:0016021, integral component of membrane	-	45.0909	44.9135	66.5743	4.15853	5.57709	12.1743	6.21034	2.92554	9.20089	5.04351	7.76076	38.2375	9.73795	5.4348	6.4321	7.80617	18.0961	26.7484
T_38349_c0_g2	gi|351722084|ref|NP_001235696.1| uncharacterized protein LOC100500532 [Glycine max] 8.8e-28	GO:0003735, structural constituent of ribosome;GO:0005840, ribosome;GO:0006412, translation;GO:0019843, rRNA binding	K02990-ko03010 Ribosome	31.4846	22.8043	15.7213	12.0128	14.5884	16.4221	12.9258	12.6964	9.21322	8.17226	11.7525	9.36945	14.1948	10.2887	9.82546	10.2649	12.5706	14.4498
T_38359_c0_g2	gi|734416367|gb|KHN38246.1| Protein grpE [Glycine soja] 4.8e-141	GO:0000774, adenyl-nucleotide exchange factor activity;GO:0005737, cytoplasm;GO:0005759, mitochondrial matrix;GO:0006457, protein folding	-	11.1975	6.94968	5.64716	5.09862	6.27518	6.18633	6.16559	5.43515	4.06357	3.30971	4.72873	4.12971	2.11914	2.89608	3.1773	3.18167	3.53485	4.88417
T_38367_c0_g1	gi|356576537|ref|XP_003556387.1| PREDICTED: basic 7S globulin [Glycine max] 7.2e-212	GO:0004190, aspartic-type endopeptidase activity;GO:0006508, proteolysis;GO:0030163, protein catabolic process;GO:0042802, identical protein binding;GO:0045735, nutrient reservoir activity	-	4.06209	5.10985	4.66507	12.095	14.0933	3.03571	1.60181	2.00494	1.95917	5.76517	2.96744	3.36914	2.43194	2.7679	0.425193	4.26008	1.67944	1.87889
T_38370_c0_g1	gi|351723639|ref|NP_001237030.1| uncharacterized protein LOC100527763 [Glycine max] 2.8e-104	GO:0000470, maturation of LSU-rRNA;GO:0003723, RNA binding;GO:0003735, structural constituent of ribosome;GO:0006412, translation;GO:0015934, large ribosomal subunit;GO:0022625, cytosolic large ribosomal subunit	K02865-ko03010 Ribosome	13.6589	11.7322	9.31058	4.31206	6.90504	10.4211	6.59701	5.98547	3.98809	3.70982	3.90925	5.27195	4.16333	3.39312	3.68208	3.65157	3.89375	6.49997
T_38378_c0_g1	gi|356576921|ref|XP_003556578.1| PREDICTED: protein CMSS1 [Glycine max] 1.1e-62	-	-	17.9166	12.011	11.1545	6.86961	9.37797	10.1681	7.25852	6.8362	4.35176	6.18768	4.47321	7.09393	6.19477	4.62904	4.78912	6.4301	8.63487	10.1573
T_38386_c0_g1	gi|734389125|gb|KHN26133.1| Carbonic anhydrase, chloroplastic [Glycine soja] 4.2e-165	GO:0004089, carbonate dehydratase activity;GO:0008270, zinc ion binding;GO:0009507, chloroplast;GO:0015976, carbon utilization	K01673-ko00910 Nitrogen metabolism	12.3749	9.021	5.479	1.74721	1.23948	1.48237	4.2483	2.02432	1.96561	1.83193	4.42888	5.32384	5.46046	3.76736	2.26967	2.38394	2.23468	3.53135
T_38424_c0_g1	gi|351723099|ref|NP_001236499.1| zinc transporter protein ZIP1 precursor [Glycine max] 4.2e-129	GO:0005385, zinc ion transmembrane transporter activity;GO:0005886, plasma membrane;GO:0016021, integral component of membrane;GO:0071577, zinc ion transmembrane transport	-	2.79239	2.54135	1.44573	12.0322	6.90629	2.98087	14.3761	16.8839	16.2437	22.7444	7.76801	6.62394	13.2456	14.9552	8.39816	15.8871	10.1188	13.3591
T_38441_c0_g1	gi|571566317|ref|XP_003555229.2| PREDICTED: probable carboxylesterase 6 [Glycine max] 2.4e-173	GO:0008152, metabolic process;GO:0016787, hydrolase activity;GO:0052689, carboxylic ester hydrolase activity	-	2.46765	7.83107	9.71165	2.76675	3.50348	0.684534	37.2951	14.1218	5.07768	26.6463	24.3402	1.94836	7.3726	5.70033	10.9981	85.8006	63.068	37.0966
T_38444_c0_g1	gi|955357761|ref|XP_014621052.1| PREDICTED: protein ABSCISIC ACID-INSENSITIVE 5-like [Glycine max] 4.4e-79	GO:0003700, DNA binding transcription factor activity;GO:0005634, nucleus;GO:0006351, transcription, DNA-templated;GO:0006355, regulation of transcription, DNA-templated;GO:0009414, response to water deprivation;GO:0009651, response to salt stress;GO:0009737, response to abscisic acid;GO:0009738, abscisic acid-activated signaling pathway;GO:0009739, response to gibberellin;GO:0009845, seed germin…	K14432-ko04075 Plant hormone signal transduction	7.03889	4.70542	5.91476	0.636871	1.52684	3.50688	1.92844	1.23226	1.88315	1.51795	2.81883	3.62832	1.19418	3.68607	2.59632	0.358565	1.63412	1.45991
T_38447_c1_g1	gi|955328933|ref|XP_003530145.3| PREDICTED: ethylene-responsive transcription factor 14-like [Glycine max] 2.3e-50	GO:0003677, DNA binding;GO:0003700, DNA binding transcription factor activity;GO:0005634, nucleus;GO:0006351, transcription, DNA-templated;GO:0006952, defense response;GO:0009873, ethylene-activated signaling pathway;GO:0010200, response to chitin	-	5.46809	10.3322	13.5715	1.22321	1.87793	0.165598	6.88399	4.05775	9.11187	3.8766	5.54452	2.85848	1.41712	2.02117	3.52717	14.4361	25.3515	14.1646
T_38447_c1_g2	gi|356504573|ref|XP_003521070.1| PREDICTED: ethylene-responsive transcription factor 13 [Glycine max] 2.6e-88	GO:0003677, DNA binding;GO:0003700, DNA binding transcription factor activity;GO:0005634, nucleus;GO:0006351, transcription, DNA-templated;GO:0006952, defense response;GO:0009873, ethylene-activated signaling pathway;GO:0010200, response to chitin	-	0.923643	3.37258	2.68827	0	1.13767	0	2.98439	2.09535	12.0542	1.93888	1.66803	0.321167	0.605779	0.153525	1.21538	14.0456	12.444	6.79152
T_38452_c1_g2	gi|356573950|ref|XP_003555117.1| PREDICTED: protein DETOXIFICATION 9 isoform X1 [Glycine max] 3.9e-167	GO:0006855, drug transmembrane transport;GO:0009611, response to wounding;GO:0015238, drug transmembrane transporter activity;GO:0015297, antiporter activity;GO:0016021, integral component of membrane	-	8.10615	10.9368	14.2338	5.71565	9.21215	11.2386	7.30722	6.85838	6.54515	5.1282	5.46286	11.7248	6.82716	3.57524	2.10957	2.86992	6.64471	3.7968
T_38455_c0_g1	gi|356521100|ref|XP_003529196.1| PREDICTED: UPF0496 protein At4g34320-like [Glycine max] 3.9e-161	GO:0016021, integral component of membrane	-	6.80202	7.63063	11.0865	1.91569	2.88467	1.87617	9.89272	9.64365	2.68414	5.70984	9.02543	2.13906	5.7454	3.10844	4.31283	14.0094	11.8484	13.6592
T_38464_c2_g1	gi|947126318|gb|KRH74172.1| hypothetical protein GLYMA_01G004100 [Glycine max] 0.0e+00	GO:0015031, protein transport	K19476-ko04144 Endocytosis	6.41043	4.66423	8.19493	2.14131	2.56706	2.55553	4.75062	4.06982	1.73347	2.21737	3.61717	1.53717	1.9977	1.6079	3.0193	7.75486	6.13886	7.48172
T_38464_c2_g2	gi|947049878|gb|KRG99406.1| hypothetical protein GLYMA_18G142600 [Glycine max] 1.6e-88	GO:0005737, cytoplasm;GO:0005739, mitochondrion;GO:0010917, negative regulation of mitochondrial membrane potential;GO:0010940, positive regulation of necrotic cell death;GO:0016021, integral component of membrane;GO:0035794, positive regulation of mitochondrial membrane permeability;GO:0070062, extracellular exosome	-	13.2496	10.2857	8.29481	0.0738324	2.18559	2.39119	1.05997	1.98405	0.307193	0.445515	0.586463	2.74951	0.719456	0.488791	0.423	0.991264	0.682766	0.534537
T_38470_c0_g1	gi|358248550|ref|NP_001240156.1| uncharacterized protein LOC100805729 [Glycine max] 7.7e-34	-	-	25.6352	12.9041	9.64268	3.69776	4.02568	6.3106	6.63247	9.22781	4.20395	4.7181	5.95863	4.1658	5.80391	3.83931	6.20058	7.54687	5.71339	5.80094
T_38480_c0_g4	gi|734336028|gb|KHN08107.1| Boron transporter 4 [Glycine soja] 0.0e+00	GO:0005452, inorganic anion exchanger activity;GO:0005887, integral component of plasma membrane;GO:0008509, anion transmembrane transporter activity;GO:0015301, anion:anion antiporter activity;GO:0016021, integral component of membrane;GO:0051453, regulation of intracellular pH;GO:0098656, anion transmembrane transport	-	3.14553	2.58858	11.2106	1.22967	0.864155	2.01721	4.67815	1.52879	1.93077	0.920489	2.39299	1.56136	1.73031	0.908409	1.45899	3.85843	5.32975	3.23444
T_38484_c0_g1	gi|351726204|ref|NP_001235071.1| uncharacterized protein LOC100305928 precursor [Glycine max] 1.8e-19	GO:0016021, integral component of membrane	-	47.4449	34.5246	31.2453	14.1244	18.0121	21.4412	20.771	24.265	8.99818	13.1858	16.5574	16.0968	17.291	12.0101	11.9202	17.2878	23.2279	25.6575
T_38492_c0_g2	gi|571456270|ref|XP_006580337.1| PREDICTED: protein trichome birefringence-like 14 [Glycine max] 6.9e-234	GO:0016021, integral component of membrane	-	10.0611	5.55567	6.15414	5.02685	2.89827	4.74946	4.47809	4.28895	2.63281	1.6019	3.45436	2.16082	3.1691	2.61205	3.88268	2.84108	4.3091	5.01532
T_38492_c2_g2	gi|734425490|gb|KHN43167.1| Peroxygenase 2 [Glycine soja] 2.5e-109	GO:0004392, heme oxygenase (decyclizing) activity;GO:0004497, monooxygenase activity;GO:0005509, calcium ion binding;GO:0005811, lipid droplet;GO:0006952, defense response;GO:0016021, integral component of membrane;GO:0031408, oxylipin biosynthetic process;GO:0071614, linoleic acid epoxygenase activity;GO:1990137, plant seed peroxidase activity	K17991-ko00073 Cutin, suberine and wax biosynthesis	131.466	138.491	151.086	215.823	164.44	136.723	228.524	260.332	185.241	272.806	220.091	207.22	232.052	364.406	290.307	320.635	220.709	177.749
T_38494_c0_g1	gi|356525551|ref|XP_003531388.1| PREDICTED: neutral/alkaline invertase 3, chloroplastic-like [Glycine max] 0.0e+00	GO:0004575, sucrose alpha-glucosidase activity;GO:0005982, starch metabolic process;GO:0005987, sucrose catabolic process;GO:0009507, chloroplast;GO:0033926, glycopeptide alpha-N-acetylgalactosaminidase activity;GO:0048825, cotyledon development	-	6.73094	6.64566	5.44536	2.91788	3.2593	3.24302	5.04563	5.91495	2.02633	3.10768	3.15747	2.50153	2.50875	1.87228	2.19288	3.21593	2.80538	3.08354
T_38513_c0_g1	gi|947092140|gb|KRH40805.1| hypothetical protein GLYMA_09G278800 [Glycine max] 2.1e-56	GO:0006952, defense response;GO:0009507, chloroplast	-	7.18794	1.15001	1.4125	10.8039	33.2049	9.02102	18.7855	18.1837	39.3122	16.5247	12.0743	0.825117	10.835	16.6215	18.3316	27.2469	7.06741	13.4086
T_38516_c0_g1	gi|356573611|ref|XP_003554951.1| PREDICTED: putative calcium-transporting ATPase 13, plasma membrane-type [Glycine max] 1.1e-156	GO:0005388, calcium-transporting ATPase activity;GO:0005524, ATP binding;GO:0005887, integral component of plasma membrane;GO:0043231, intracellular membrane-bounded organelle;GO:0046872, metal ion binding	-	3.67321	5.65772	17.9818	2.63307	2.08657	0.972133	7.84669	2.34645	2.21926	2.74606	3.69226	2.78154	1.07462	1.66014	2.14893	6.07338	5.27386	2.61896
T_38517_c0_g1	gi|356550834|ref|XP_003543788.1| PREDICTED: pathogenesis-related protein 5-like [Glycine max] 1.1e-160	GO:0005618, cell wall;GO:0005773, vacuole;GO:0009615, response to virus;GO:0009627, systemic acquired resistance;GO:0010224, response to UV-B;GO:0016021, integral component of membrane;GO:0031540, regulation of anthocyanin biosynthetic process;GO:0046686, response to cadmium ion;GO:0048046, apoplast	-	22.6844	17.7352	19.4763	6.13336	10.4138	15.5875	9.44585	6.41925	4.86739	5.88803	7.30493	17.2939	11.9834	8.00931	9.10127	6.81694	12.7198	11.3311
T_38546_c0_g1	gi|729381674|ref|XP_010550425.1| PREDICTED: thioredoxin domain-containing protein PLP3B isoform X2 [Tarenaya hassleriana] 7.4e-62	GO:0000280, nuclear division;GO:0000911, cytokinesis by cell plate formation;GO:0005634, nucleus;GO:0005737, cytoplasm;GO:0005874, microtubule;GO:0007000, nucleolus organization;GO:0008616, queuosine biosynthetic process;GO:0043622, cortical microtubule organization;GO:0045454, cell redox homeostasis;GO:0048487, beta-tubulin binding;GO:0051211, anisotropic cell growth	-	28.8142	15.2376	13.3415	8.74329	9.34503	12.8915	11.2168	8.98863	6.39783	5.35011	7.53081	6.98266	6.74844	7.81759	7.16866	8.09484	8.72477	13.7314
T_38554_c0_g1	gi|947096553|gb|KRH45138.1| hypothetical protein GLYMA_08G253200 [Glycine max] 1.1e-58	-	-	6.17541	6.78884	4.77026	0.995539	1.10666	4.41056	3.27825	1.38634	1.57757	0.759691	1.38483	5.36445	1.24253	0.0606166	0.428942	0.812154	0.727	2.08937
T_38586_c0_g1	-	-	-	14.3419	1.23656	7.7306	63.1589	10.4203	0	4.93066	63.7965	0	8.75771	41.4542	31.2256	0	0	3.47089	0	0	3.41818
T_38586_c0_g2	-	-	-	12.5011	3.78723	5.69012	3.27301	0	0	0.239697	0	0	2.64476	0	0.231241	0.242216	0	0	0	0.224917	0
T_38604_c0_g2	gi|356568082|ref|XP_003552242.1| PREDICTED: alcohol dehydrogenase-like 4 [Glycine max] 1.8e-77	GO:0004022, alcohol dehydrogenase (NAD) activity;GO:0005737, cytoplasm;GO:0008270, zinc ion binding;GO:0016491, oxidoreductase activity	-	3.75211	5.78006	5.38639	14.6018	19.9082	14.7535	27.2104	28.5248	42.9481	35.4292	29.7646	10.8327	27.0025	32.8988	25.4066	18.6755	18.5501	16.6838
T_38604_c0_g3	gi|951019079|ref|XP_014512028.1| PREDICTED: alcohol dehydrogenase-like 4 [Vigna radiata var. radiata] 4.5e-16	GO:0004022, alcohol dehydrogenase (NAD) activity;GO:0005737, cytoplasm;GO:0008270, zinc ion binding;GO:0016491, oxidoreductase activity	-	8.19208	9.82474	8.84911	27.479	36.9863	23.364	34.9158	42.7345	59.7616	53.3861	40.3285	18.3977	50.6394	62.1608	59.4577	37.9772	49.6199	60.0393
T_38615_c2_g6	gi|947042270|gb|KRG91994.1| hypothetical protein GLYMA_20G184300 [Glycine max] 5.4e-138	GO:0001046, core promoter sequence-specific DNA binding;GO:0001228, transcriptional activator activity, RNA polymerase II transcription regulatory region sequence-specific DNA binding;GO:0005634, nucleus;GO:0006366, transcription by RNA polymerase II	-	93.0008	51.9747	33.9451	18.0351	25.8145	28.5578	43.6048	43.7611	17.1117	24.8519	32.3572	19.7757	22.4904	23.8904	30.1836	20.6647	37.6189	52.1863
T_38620_c2_g6	gi|356498797|ref|XP_003518235.1| PREDICTED: protein EXORDIUM-like 2 [Glycine max] 3.2e-156	GO:0005615, extracellular space;GO:0005618, cell wall;GO:0005794, Golgi apparatus;GO:0005829, cytosol;GO:0009505, plant-type cell wall;GO:0009506, plasmodesma;GO:0048046, apoplast	-	3.97395	5.30641	9.8273	1.18958	2.11261	1.21602	2.83969	0.877543	1.03373	1.01578	3.98727	5.52019	1.76105	1.62544	1.99758	1.81492	3.54064	4.61106
T_38632_c0_g1	gi|356538632|ref|XP_003537805.1| PREDICTED: uncharacterized protein LOC100802385 [Glycine max] 4.0e-144	-	K19366-ko04144 Endocytosis	12.0074	35.6332	67.8806	13.0127	11.0485	8.98167	68.7202	33.1743	26.6022	50.0529	67.0708	29.2707	24.6689	38.3079	29.2087	163.608	147.807	93.3272
T_38649_c0_g3	gi|571543244|ref|XP_003553186.2| PREDICTED: 60S ribosomal protein L10 [Glycine max] 2.7e-96	GO:0000027, ribosomal large subunit assembly;GO:0003735, structural constituent of ribosome;GO:0005840, ribosome;GO:0006412, translation;GO:0022625, cytosolic large ribosomal subunit	K02866-ko03010 Ribosome	45.9947	50.929	60.2339	246.941	142.178	115.83	106.624	138.8	129.564	300.706	83.5805	56.6393	237.791	363.754	85.0923	258.728	234.716	160.395
T_38654_c0_g1	gi|593269482|ref|XP_007136918.1| hypothetical protein PHAVU_009G084800g [Phaseolus vulgaris] 1.3e-209	GO:0006511, ubiquitin-dependent protein catabolic process;GO:0016021, integral component of membrane;GO:0016579, protein deubiquitination;GO:0036459, thiol-dependent ubiquitinyl hydrolase activity;GO:0046872, metal ion binding	-	24.7671	17.6398	18.1372	8.64839	8.44205	10.7474	12.5487	12.8951	6.80976	7.35098	8.90549	8.70315	7.8942	7.07744	9.43387	5.6764	9.07261	10.6562
T_38658_c1_g2	gi|1021535291|ref|XP_016164677.1| PREDICTED: protein transport protein sec31-like [Arachis ipaensis] 1.6e-26	-	-	48.5915	6.03258	13.8267	32.2663	1.60824	4.86691	9.27717	16.7859	0.224543	15.8959	25.0701	15.4164	3.81731	0.896642	5.96508	1.64023	4.74011	6.10353
T_38668_c1_g1	gi|593696175|ref|XP_007148586.1| hypothetical protein PHAVU_006G220900g [Phaseolus vulgaris] 5.9e-199	GO:0005634, nucleus;GO:0006355, regulation of transcription, DNA-templated;GO:0008270, zinc ion binding	-	10.7417	7.75741	5.29876	3.71288	3.85784	6.33409	3.96241	9.94974	2.43693	4.63422	4.1863	2.76636	3.09865	2.19135	2.30372	4.48652	4.93781	7.34886
T_38668_c1_g4	gi|920708758|gb|KOM50755.1| hypothetical protein LR48_Vigan08g158200 [Vigna angularis] 4.6e-07	-	-	4.48961	5.37776	8.69768	10.6424	13.2172	10.0715	17.7135	20.8794	13.8091	18.2642	18.6102	12.601	11.0365	12.8504	16.4267	10.8165	9.47332	5.40093
T_38675_c0_g1	gi|1012329931|gb|KYP41483.1| Putative serine/threonine-protein kinase receptor [Cajanus cajan] 2.4e-42	GO:0004674, protein serine/threonine kinase activity;GO:0005516, calmodulin binding;GO:0005524, ATP binding;GO:0005886, plasma membrane;GO:0006468, protein phosphorylation;GO:0006952, defense response;GO:0009506, plasmodesma;GO:0016021, integral component of membrane;GO:0030246, carbohydrate binding;GO:0031625, ubiquitin protein ligase binding;GO:0048544, recognition of pollen	-	6.1898	3.57881	5.25584	0.570626	1.16125	1.23048	3.69049	1.21093	0.978761	0.787962	2.64251	1.50754	1.11895	1.18124	1.43206	4.50207	5.30478	7.02019
T_38682_c0_g1	gi|356520597|ref|XP_003528948.1| PREDICTED: LOB domain-containing protein 41-like [Glycine max] 6.4e-108	GO:0006355, regulation of transcription, DNA-templated	-	2.82397	11.0511	24.3031	43.6965	52.1844	23.2204	80.9099	77.6697	66.8107	125.844	28.7497	15.3124	97.1188	161.417	27.6762	144.312	95.5996	68.1181
T_38683_c0_g2	-	GO:0003723, RNA binding;GO:0003968, RNA-directed 5'-3' RNA polymerase activity;GO:0004386, helicase activity;GO:0005524, ATP binding;GO:0006351, transcription, DNA-templated;GO:0006396, RNA processing;GO:0008174, mRNA methyltransferase activity;GO:0008234, cysteine-type peptidase activity;GO:0016491, oxidoreductase activity;GO:0039694, viral RNA genome replication;GO:0046872, metal ion binding	-	1132.91	405.091	1171.94	177.584	96.4817	382.969	381.25	510.476	182.154	178.029	298.763	308.594	190.762	38.6719	262.263	267.469	128.368	627.708
T_38707_c0_g1	gi|955379216|ref|XP_014625206.1| PREDICTED: putative pentatricopeptide repeat-containing protein At1g16830 isoform X1 [Glycine max] 1.2e-295	GO:0016021, integral component of membrane	-	9.17445	9.80141	7.24008	5.1685	3.18921	7.81103	8.70793	7.68986	5.90002	5.72971	7.91257	5.99816	4.04539	3.96658	5.67321	1.65498	3.77044	3.74551
T_38709_c0_g1	gi|947069474|gb|KRH18365.1| hypothetical protein GLYMA_13G054400 [Glycine max] 1.2e-129	GO:0004672, protein kinase activity;GO:0004674, protein serine/threonine kinase activity;GO:0005524, ATP binding;GO:0005622, intracellular;GO:0005886, plasma membrane;GO:0007338, single fertilization;GO:0009506, plasmodesma;GO:0009723, response to ethylene;GO:0009738, abscisic acid-activated signaling pathway;GO:0009741, response to brassinosteroid;GO:0009742, brassinosteroid mediated signaling p…	-	17.518	32.4785	57.2696	46.7332	45.7103	18.6355	95.2016	73.7854	91.6959	103.419	120.516	43.5476	65.5917	52.3054	108.927	104.696	76.7534	26.8578
T_38711_c0_g1	gi|255631674|gb|ACU16204.1| unknown [Glycine max] 2.2e-24	GO:0016021, integral component of membrane	-	36.207	47.6555	57.2176	13.4441	16.8379	16.5072	27.9156	22.0712	18.0865	29.8226	28.7542	17.2665	25.3049	28.1337	12.1471	82.6219	55.5255	73.3724
T_38712_c0_g3	gi|356553124|ref|XP_003544908.1| PREDICTED: probable WRKY transcription factor 25 [Glycine max] 5.1e-104	GO:0003700, DNA binding transcription factor activity;GO:0005634, nucleus;GO:0006351, transcription, DNA-templated;GO:0006970, response to osmotic stress;GO:0009408, response to heat;GO:0009409, response to cold;GO:0009414, response to water deprivation;GO:0009651, response to salt stress;GO:0010120, camalexin biosynthetic process;GO:0010200, response to chitin;GO:0010508, positive regulation of …	K13424-ko04016 MAPK signaling pathway - plant	43.3897	62.5805	101.791	45.6682	35.4555	23.6966	89.4169	54.2098	78.2761	73.1989	101.926	28.0248	57.9454	71.1115	70.9953	186.192	166.417	110.215
T_38714_c0_g1	gi|922329823|ref|XP_003629566.2| disease resistance protein (CC-NBS-LRR class) family protein [Medicago truncatula] 1.1e-19	GO:0006952, defense response;GO:0043531, ADP binding	-	0.727259	4.07293	14.8139	0.747821	0.544833	0.402436	4.49762	2.29317	0.828249	1.78019	4.74579	1.07054	0.812745	0.826295	2.05896	9.93003	10.5801	3.90751
T_38721_c0_g1	gi|571435488|ref|XP_006573496.1| PREDICTED: uncharacterized protein LOC100820285 isoform X2 [Glycine max] 2.0e-14	GO:0016021, integral component of membrane	-	7.53441	6.99889	6.8646	3.5131	3.06886	3.85953	5.43526	3.70377	1.81523	2.39997	3.59758	4.87158	2.63453	2.94496	2.58477	3.53979	3.62023	3.60403
T_38723_c0_g1	gi|571464617|ref|XP_006583118.1| PREDICTED: protein TSS-like [Glycine max] 0.0e+00	GO:0007049, cell cycle;GO:0007275, multicellular organism development	-	12.0715	7.74311	8.64632	6.42475	5.23867	6.69738	6.43321	10.6604	2.80749	4.86663	9.96185	3.29623	2.39012	1.80156	4.44505	3.23655	2.73494	3.53718
T_38735_c0_g1	gi|571500759|ref|XP_003543166.2| PREDICTED: C2 domain-containing protein At1g53590 isoform X1 [Glycine max] 6.9e-147	GO:0005773, vacuole;GO:0005886, plasma membrane;GO:0016021, integral component of membrane	-	18.9747	11.8362	13.5157	8.45869	5.89227	5.37949	9.72745	9.39128	4.84375	5.71088	10.037	4.79533	4.32517	3.95332	5.56975	9.69217	8.97579	10.4081
T_38736_c0_g1	gi|734364275|gb|KHN17176.1| Pre-mRNA-processing factor 40 like A [Glycine soja] 1.2e-247	GO:0000398, mRNA splicing, via spliceosome;GO:0003723, RNA binding;GO:0005685, U1 snRNP;GO:0005829, cytosol;GO:0006351, transcription, DNA-templated;GO:0006355, regulation of transcription, DNA-templated;GO:0016592, mediator complex;GO:0071004, U2-type prespliceosome	K12821-ko03040 Spliceosome	21.5151	6.10534	2.32045	3.24277	1.36371	3.611	2.24751	2.40344	1.43333	1.18519	2.36937	1.91071	1.86575	1.6005	1.52806	1.04889	1.34259	2.93567
T_38738_c0_g1	gi|1012323106|gb|KYP35295.1| Myb family transcription factor APL [Cajanus cajan] 4.9e-68	GO:0003677, DNA binding;GO:0005634, nucleus;GO:0006351, transcription, DNA-templated;GO:0006355, regulation of transcription, DNA-templated	-	9.0174	8.06137	7.13825	1.69063	2.78571	7.44207	3.01964	3.4079	2.87437	2.08063	3.279	3.21204	4.96174	1.78179	3.36745	2.36187	3.71875	5.17517
T_38739_c0_g1	gi|356556535|ref|XP_003546580.1| PREDICTED: protein OS-9 homolog [Glycine max] 1.2e-144	GO:0005783, endoplasmic reticulum;GO:0005788, endoplasmic reticulum lumen;GO:0009651, response to salt stress;GO:0030246, carbohydrate binding;GO:0030433, ubiquitin-dependent ERAD pathway;GO:0030970, retrograde protein transport, ER to cytosol	K10088-ko04141 Protein processing in endoplasmic reticulum	26.8873	13.6168	9.17785	8.34996	6.22259	11.0198	7.07527	8.12155	8.77946	4.86171	6.98071	5.49126	5.28723	6.4895	5.37529	5.29263	10.419	7.89468
T_38739_c2_g1	gi|356570978|ref|XP_003553659.1| PREDICTED: putative GTP diphosphokinase RSH1, chloroplastic isoform X1 [Glycine max] 1.5e-272	GO:0005524, ATP binding;GO:0005525, GTP binding;GO:0008728, GTP diphosphokinase activity;GO:0008893, guanosine-3',5'-bis(diphosphate) 3'-diphosphatase activity;GO:0009507, chloroplast;GO:0015969, guanosine tetraphosphate metabolic process;GO:0016301, kinase activity;GO:0042594, response to starvation	K00951-ko00230 Purine metabolism	174.728	268.746	353.439	1327.43	1083.27	666.29	590.388	683.17	1471.98	870.935	577.806	620.412	1158.69	1063.34	633.116	744.914	957.202	761.766
T_38746_c3_g2	gi|1012332579|gb|KYP44005.1| Putative apospory-associated protein C, partial [Cajanus cajan] 9.2e-77	GO:0005975, carbohydrate metabolic process;GO:0016853, isomerase activity;GO:0030246, carbohydrate binding;GO:0047938, glucose-6-phosphate 1-epimerase activity	K01792-ko00010 Glycolysis / Gluconeogenesis	19.8053	11.2347	9.59315	3.25089	4.47607	4.63508	6.09112	3.96923	2.46589	3.64436	4.82202	3.99038	2.83545	1.55439	6.3107	3.94134	3.69046	6.51681
T_38753_c2_g3	gi|13359451|dbj|BAB33421.1| putative senescence-associated protein [Pisum sativum] 6.6e-35	-	-	304.634	54.3812	121.401	56.4678	13.7754	81.4855	40.5115	20.8225	23.7802	62.151	39.733	191.774	236.852	31.0664	37.9842	46.7762	66.9868	104.669
T_38756_c0_g1	gi|571440802|ref|XP_006575261.1| PREDICTED: uncharacterized protein LOC102665591 [Glycine max] 1.2e-59	GO:0016021, integral component of membrane	-	29.7595	35.2736	45.3557	74.7767	35.7244	28.692	67.4961	69.508	52.2759	99.1838	58.2657	50.7469	53.2277	165.6	37.9315	135.576	70.1657	56.4215
T_38759_c3_g4	gi|734343114|gb|KHN10237.1| Dehydration-responsive protein RD22 [Glycine soja] 1.8e-157	GO:0005768, endosome;GO:0005794, Golgi apparatus;GO:0005802, trans-Golgi network;GO:0009651, response to salt stress	-	485.157	495.95	279.501	529.586	938.461	569.136	696.211	702.486	1099.11	586.771	980.493	485.62	1076.59	969.39	1703.1	601.237	775.89	866.453
T_38760_c0_g1	gi|356506073|ref|XP_003521812.1| PREDICTED: uncharacterized protein LOC100784190 [Glycine max] 3.4e-208	GO:0016021, integral component of membrane	-	14.4341	8.08619	4.98967	4.63695	2.41889	3.88477	5.02119	5.2993	2.48767	1.80752	3.56883	2.5791	2.74737	3.8556	4.55032	5.30297	5.63505	9.32703
T_38796_c1_g3	gi|356513880|ref|XP_003525636.1| PREDICTED: G patch domain-containing protein TGH-like isoform X1 [Glycine max] 0.0e+00	GO:0003723, RNA binding;GO:0005634, nucleus;GO:0006396, RNA processing;GO:0006397, mRNA processing;GO:0010087, phloem or xylem histogenesis;GO:0016607, nuclear speck;GO:0030422, production of siRNA involved in RNA interference;GO:0035196, production of miRNAs involved in gene silencing by miRNA;GO:0040008, regulation of growth;GO:0070878, primary miRNA binding;GO:0070883, pre-miRNA binding	-	6.81676	4.80119	4.3449	5.09642	2.24889	4.62793	3.65199	2.96924	3.58498	2.22198	3.03379	1.51664	1.733	2.07079	1.59885	1.6817	2.168	2.27753
T_38797_c1_g2	-	-	-	0.843239	1.42665	0.214194	10.9016	0.448406	0.813487	6.29003	4.13922	0	10.4122	4.46267	3.37018	0.700651	5.90947	5.39015	0.740792	11.4742	4.81005
T_38806_c1_g4	gi|947101068|gb|KRH49560.1| hypothetical protein GLYMA_07G163300 [Glycine max] 4.6e-17	-	-	2.13109	0.884068	1.08481	0.284192	0.373228	0.229169	5.70801	1.40808	2.47721	1.28035	4.84485	0.203381	2.08758	0.70687	1.73676	6.76784	6.82233	7.40542
T_38809_c0_g1	gi|356575446|ref|XP_003555852.1| PREDICTED: FAD-dependent urate hydroxylase-like [Glycine max] 1.5e-33	GO:0009540, zeaxanthin epoxidase [overall] activity;GO:0052662, zeaxanthin epoxidase activity;GO:0052663, antheraxanthin epoxidase activity;GO:0071949, FAD binding	-	39.579	31.7707	20.5454	12.8918	10.1456	14.152	16.359	14.6568	11.5637	13.7431	25.5466	11.9448	24.1525	17.4095	21.2796	15.9538	21.9716	39.0116
T_38821_c0_g1	gi|356575136|ref|XP_003555698.1| PREDICTED: 65-kDa microtubule-associated protein 6 isoform X1 [Glycine max] 5.4e-288	GO:0000226, microtubule cytoskeleton organization;GO:0000910, cytokinesis;GO:0005634, nucleus;GO:0005739, mitochondrion;GO:0005874, microtubule;GO:0008017, microtubule binding;GO:0009524, phragmoplast;GO:0009536, plastid;GO:0009574, preprophase band	-	22.301	10.8332	9.80313	5.62941	6.7867	8.89237	7.63506	7.68673	6.73497	4.18789	6.55436	6.04626	5.18712	3.42923	6.50776	3.75582	6.00334	7.72764
T_38843_c0_g1	gi|734429433|gb|KHN45155.1| Transcription initiation factor TFIID subunit 4, partial [Glycine soja] 2.0e-311	GO:0003743, translation initiation factor activity;GO:0005669, transcription factor TFIID complex;GO:0006352, DNA-templated transcription, initiation;GO:0006355, regulation of transcription, DNA-templated	K03129-ko03022 Basal transcription factors	27.7035	18.5156	11.5601	9.70707	6.6747	10.2147	15.9215	9.91714	6.40144	5.68879	8.72588	6.71359	6.36383	6.33157	7.94712	7.88949	11.907	20.7237
T_38844_c0_g8	gi|351723683|ref|NP_001235240.1| lectin-like receptor kinase [Glycine max] 1.7e-61	GO:0002229, defense response to oomycetes;GO:0004674, protein serine/threonine kinase activity;GO:0004714, transmembrane receptor protein tyrosine kinase activity;GO:0005524, ATP binding;GO:0005886, plasma membrane;GO:0010726, positive regulation of hydrogen peroxide metabolic process;GO:0010942, positive regulation of cell death;GO:0016021, integral component of membrane;GO:0030246, carbohydrate…	-	1.15971	2.87562	3.2787	4.79579	4.33885	0.997263	6.33591	4.53408	3.33766	5.80316	4.29201	2.10325	2.14856	9.36659	3.67313	12.7951	10.1446	3.21888
T_38846_c0_g1	gi|922390836|ref|XP_013463836.1| calcineurin-like metallo-phosphoesterase superfamily protein [Medicago truncatula] 6.3e-69	-	-	7.371	6.8131	4.49685	2.84009	1.24038	2.10345	2.70159	2.49033	1.03532	2.20175	2.85868	3.49353	1.98425	2.17484	1.47597	2.61147	5.32793	4.97301
T_38857_c0_g1	gi|734413244|gb|KHN36689.1| hypothetical protein glysoja_001420 [Glycine soja] 6.2e-116	-	-	20.2376	11.9499	10.7189	7.69346	10.2894	9.43134	8.95631	14.5922	5.96765	6.53987	9.81718	5.15394	4.68962	6.52589	5.91123	6.0514	6.77205	6.11196
T_38858_c2_g6	gi|593686964|ref|XP_007144150.1| hypothetical protein PHAVU_007G133000g [Phaseolus vulgaris] 2.0e-82	GO:0000166, nucleotide binding;GO:0003676, nucleic acid binding;GO:0003723, RNA binding;GO:0005737, cytoplasm;GO:0006397, mRNA processing;GO:0016607, nuclear speck	K14396-ko03015 mRNA surveillance pathway	46.9593	37.0164	29.7297	17.859	31.6324	34.6853	22.3922	23.6753	13.639	16.86	16.998	16.7477	17.6301	13.2335	12.7362	20.8677	26.2798	29.4319
T_38864_c1_g9	gi|947090109|gb|KRH38774.1| hypothetical protein GLYMA_09G156900 [Glycine max] 2.4e-28	GO:0005737, cytoplasm;GO:0006725, cellular aromatic compound metabolic process;GO:0008198, ferrous iron binding;GO:0008270, zinc ion binding;GO:0016701, oxidoreductase activity, acting on single donors with incorporation of molecular oxygen;GO:0046566, DOPA dioxygenase activity;GO:0050297, stizolobate synthase activity;GO:0055114, oxidation-reduction process	-	11.0983	16.3036	12.5636	21.8239	19.3548	20.8077	16.5113	19.8453	25.4681	27.6861	23.3681	12.0462	23.2729	41.6479	17.7285	33.543	25.4424	38.6023
T_38870_c0_g1	gi|1012351159|gb|KYP62348.1| Potassium transporter 11 [Cajanus cajan] 2.6e-18	GO:0005886, plasma membrane;GO:0015079, potassium ion transmembrane transporter activity;GO:0016021, integral component of membrane	-	7.63955	5.74561	3.8881	4.2394	1.83236	3.75666	3.96435	4.38147	1.69952	3.78567	4.0282	3.66514	1.59121	1.93526	1.0705	1.5361	1.64571	3.20096
T_38876_c6_g4	gi|593330083|ref|XP_007138468.1| hypothetical protein PHAVU_009G211700g [Phaseolus vulgaris] 2.2e-49	-	-	6.04726	5.66984	3.16525	20.2155	10.4146	9.64576	6.99191	13.36	14.8407	16.6248	5.34371	11.4503	20.7261	41.2474	15.4296	9.57517	4.19275	3.66615
T_38894_c0_g1	-	-	-	7.39708	8.033	5.70002	5.2446	1.23986	8.49513	7.03023	4.54202	3.03119	5.42546	2.68211	4.58281	4.76945	6.75252	4.01406	1.19698	1.64842	1.57605
T_38897_c1_g1	gi|593686648|ref|XP_007143995.1| hypothetical protein PHAVU_007G120200g [Phaseolus vulgaris] 4.9e-209	GO:0005887, integral component of plasma membrane;GO:0008519, ammonium transmembrane transporter activity;GO:0015695, organic cation transport;GO:0015696, ammonium transport;GO:0016021, integral component of membrane;GO:0019740, nitrogen utilization;GO:0072488, ammonium transmembrane transport	-	8.34884	7.08344	3.00924	6.6283	10.2727	6.71806	8.51097	7.57474	12.0363	8.38001	20.2952	7.48942	19.7453	15.3465	61.1473	14.9605	12.607	21.0051
T_38899_c0_g1	gi|356539388|ref|XP_003538180.1| PREDICTED: GDSL esterase/lipase At5g22810 [Glycine max] 4.2e-78	GO:0005576, extracellular region;GO:0016042, lipid catabolic process;GO:0016788, hydrolase activity, acting on ester bonds	-	14.8729	9.90849	10.8661	2.66743	4.73677	5.14982	3.77728	2.66776	3.50778	2.81241	4.51538	5.05099	4.9195	4.43486	7.59765	3.7617	7.27817	8.26845
T_38902_c0_g1	gi|356572582|ref|XP_003554447.1| PREDICTED: 125 kDa kinesin-related protein-like [Glycine max] 0.0e+00	GO:0003777, microtubule motor activity;GO:0005524, ATP binding;GO:0005737, cytoplasm;GO:0005819, spindle;GO:0005871, kinesin complex;GO:0005874, microtubule;GO:0007018, microtubule-based movement;GO:0008574, ATP-dependent microtubule motor activity, plus-end-directed	-	4.99537	8.23674	4.14098	1.06956	2.29642	6.01399	1.67892	2.68803	2.10265	1.01836	1.63409	2.77128	2.89503	1.93666	1.86222	1.52612	2.96539	5.46155
T_38905_c3_g2	gi|965665425|dbj|BAT80913.1| hypothetical protein VIGAN_03053900 [Vigna angularis var. angularis] 3.7e-44	GO:0004674, protein serine/threonine kinase activity;GO:0005524, ATP binding;GO:0005622, intracellular;GO:0005634, nucleus;GO:0005737, cytoplasm;GO:0006468, protein phosphorylation;GO:0016021, integral component of membrane;GO:0035556, intracellular signal transduction	-	13.9361	19.7548	17.0798	5.77775	6.73201	6.93807	13.9562	20.2253	7.40306	11.8229	21.4575	8.01647	6.16252	7.05944	12.4595	8.07164	6.99944	5.65097
T_38911_c0_g2	gi|356528775|ref|XP_003532973.1| PREDICTED: WAT1-related protein At1g68170-like [Glycine max] 6.5e-117	GO:0005886, plasma membrane;GO:0006810, transport;GO:0016021, integral component of membrane;GO:0022857, transmembrane transporter activity	-	106.146	67.2646	37.9375	28.6026	21.3159	38.0512	39.4988	37.1479	17.1953	45.462	68.6375	28.2232	30.3038	33.0539	65.8531	32.6863	43.2625	47.9204
T_38914_c0_g1	gi|955358794|ref|XP_014621266.1| PREDICTED: uncharacterized protein LOC106795509 [Glycine max] 9.7e-121	GO:0016021, integral component of membrane	-	1.94168	2.66825	2.18918	2.17698	1.88856	0.58259	4.20079	3.46548	4.37325	4.22068	3.78866	1.84097	2.98885	4.75713	3.10921	26.0727	8.36107	8.13626
T_38916_c0_g1	gi|356565266|ref|XP_003550863.1| PREDICTED: scarecrow-like protein 21 [Glycine max] 4.0e-249	GO:0000989, transcription factor activity, transcription factor binding;GO:0003700, DNA binding transcription factor activity;GO:0005634, nucleus;GO:0006351, transcription, DNA-templated;GO:0006355, regulation of transcription, DNA-templated;GO:0009739, response to gibberellin;GO:0009740, gibberellic acid mediated signaling pathway;GO:0009908, flower development;GO:0009938, negative regulation of…	-	1.1137	1.57168	0.778659	0.573851	0.786038	0.808888	1.05359	0.779359	1.19672	1.13394	8.88885	2.18152	3.64584	3.17689	12.2551	0.681004	1.76371	2.7244
T_38917_c0_g1	gi|1012328337|gb|KYP39986.1| Subtilisin-like protease [Cajanus cajan] 1.4e-23	GO:0004252, serine-type endopeptidase activity;GO:0005576, extracellular region;GO:0005618, cell wall	-	34.2874	27.9117	14.8012	11.4691	17.5713	28.2388	9.35438	4.4399	11.3311	6.75842	8.67262	14.4075	16.8245	8.06622	11.1803	10.7863	16.0256	28.4919
T_38917_c0_g2	gi|1012328337|gb|KYP39986.1| Subtilisin-like protease [Cajanus cajan] 3.5e-50	GO:0004252, serine-type endopeptidase activity;GO:0005576, extracellular region;GO:0005618, cell wall	-	112.324	81.9448	56.2791	31.5588	46.0502	62.7695	37.7434	33.4734	20.7474	23.6697	29.9308	49.0011	43.2811	29.614	42.8335	38.1852	42.6417	73.7271
T_38920_c0_g1	gi|734402480|gb|KHN32044.1| hypothetical protein glysoja_034907 [Glycine soja] 8.8e-241	GO:0003735, structural constituent of ribosome;GO:0005840, ribosome;GO:0006412, translation;GO:0016021, integral component of membrane	-	7.48663	4.79722	2.92603	3.06378	1.254	2.67135	2.27688	2.37561	1.6746	1.02506	1.71491	1.39349	1.55936	0.805477	2.46363	0.568933	1.84782	1.58332
T_38933_c5_g3	gi|571499158|ref|XP_006594420.1| PREDICTED: transcription factor bHLH130 isoform X2 [Glycine max] 9.6e-132	GO:0001046, core promoter sequence-specific DNA binding;GO:0001228, transcriptional activator activity, RNA polymerase II transcription regulatory region sequence-specific DNA binding;GO:0003700, DNA binding transcription factor activity;GO:0005634, nucleus;GO:0006355, regulation of transcription, DNA-templated;GO:0006366, transcription by RNA polymerase II;GO:0048573, photoperiodism, flowering	-	1.815	1.56215	1.82006	1.76946	3.55906	3.03953	7.29381	5.49006	3.29548	1.97438	1.76438	1.95758	2.88162	0.859318	3.66671	1.07977	1.79116	0.790613
T_38934_c0_g1	gi|356555763|ref|XP_003546199.1| PREDICTED: nuclear transcription factor Y subunit B-3 [Glycine max] 8.1e-58	GO:0003700, DNA binding transcription factor activity;GO:0005634, nucleus;GO:0006351, transcription, DNA-templated;GO:0006355, regulation of transcription, DNA-templated;GO:0043565, sequence-specific DNA binding	-	132.811	115.564	117.484	66.9525	52.0344	46.6636	66.4011	86.8401	39.0119	57.6703	85.7635	85.6752	51.375	56.1691	58.3875	96.1236	110.748	91.4953
T_38938_c0_g1	gi|356562644|ref|XP_003549579.1| PREDICTED: truncated transcription factor CAULIFLOWER A-like isoform X2 [Glycine max] 3.2e-110	GO:0003677, DNA binding;GO:0003700, DNA binding transcription factor activity;GO:0005634, nucleus;GO:0006351, transcription, DNA-templated;GO:0009908, flower development;GO:0009911, positive regulation of flower development;GO:0010077, maintenance of inflorescence meristem identity;GO:0010154, fruit development;GO:0030154, cell differentiation;GO:0032440, 2-alkenal reductase [NAD(P)] activity	-	1.45201	1.03857	2.48887	2.39604	1.67348	1.00109	5.40166	14.5762	2.34756	2.55922	1.34671	0.825176	2.20706	2.39331	1.68622	4.64467	1.89701	1.41099
T_38938_c1_g2	gi|356536669|ref|XP_003536859.1| PREDICTED: transcription factor MYB108 [Glycine max] 1.5e-72	GO:0003677, DNA binding;GO:0003700, DNA binding transcription factor activity;GO:0005634, nucleus;GO:0006351, transcription, DNA-templated;GO:0006952, defense response;GO:0009620, response to fungus;GO:0009651, response to salt stress;GO:0009723, response to ethylene;GO:0009737, response to abscisic acid;GO:0009753, response to jasmonic acid	-	26.0995	40.4301	50.2535	5.08672	9.9309	3.48433	121.192	82.3892	28.4594	83.4541	76.1559	21.5023	48.7222	89.9415	38.0899	281.649	183.65	131.783
T_38947_c0_g1	gi|571449801|ref|XP_003523759.2| PREDICTED: putative lipase ROG1 [Glycine max] 1.6e-137	GO:0004622, lysophospholipase activity;GO:0005811, lipid droplet;GO:0016021, integral component of membrane;GO:0016042, lipid catabolic process;GO:0044255, cellular lipid metabolic process;GO:0052689, carboxylic ester hydrolase activity;GO:0055088, lipid homeostasis	-	8.92017	8.68909	8.79782	3.11023	2.83274	4.41619	5.23002	4.05613	3.97314	3.49696	5.07887	5.21145	4.8105	6.33388	6.0851	5.01145	5.0285	6.54815
T_38956_c2_g3	gi|1012356192|gb|KYP67379.1| putative WRKY transcription factor 41 [Cajanus cajan] 3.7e-60	GO:0003700, DNA binding transcription factor activity;GO:0005634, nucleus;GO:0006351, transcription, DNA-templated;GO:0043565, sequence-specific DNA binding	-	0.819948	0.994046	1.53581	0.206691	0.212636	0.293251	5.93006	1.17238	1.50277	3.05305	2.7343	0.296111	1.35539	0.683762	0.554368	20.9159	13.529	8.88336
T_38956_c2_g4	gi|950969255|ref|XP_014499778.1| PREDICTED: CO(2)-response secreted protease-like [Vigna radiata var. radiata] 4.4e-101	GO:0004252, serine-type endopeptidase activity;GO:0005576, extracellular region	-	98.0684	61.2349	60.3295	16.5272	22.117	31.7702	27.2011	13.7448	17.9566	18.0505	31.7858	23.4593	28.26	24.7097	70.5126	12.6918	58.4612	67.309
T_38956_c3_g1	gi|920711152|gb|KOM52401.1| hypothetical protein LR48_Vigan09g106000 [Vigna angularis] 6.1e-271	GO:0004674, protein serine/threonine kinase activity;GO:0005524, ATP binding;GO:0009553, embryo sac development;GO:0009793, embryo development ending in seed dormancy;GO:0016021, integral component of membrane;GO:0090558, plant epidermis development	-	12.9819	14.009	20.3021	6.4922	6.75427	6.64381	21.8646	9.33545	6.21254	9.00318	16.2703	5.88972	7.71186	5.90883	8.6827	39.2363	41.0669	33.8847
T_38956_c3_g2	gi|593794227|ref|XP_007160152.1| hypothetical protein PHAVU_002G297100g [Phaseolus vulgaris] 2.0e-16	GO:0003700, DNA binding transcription factor activity;GO:0043565, sequence-specific DNA binding	-	9.62882	9.74812	17.4469	1.08458	1.90516	0.872609	22.311	8.4489	6.74368	6.63343	14.749	2.3275	3.25505	1.6503	7.94472	56.3907	33.1731	20.6052
T_38960_c2_g1	gi|1012326191|gb|KYP38018.1| hypothetical protein KK1_040758 [Cajanus cajan] 5.0e-31	GO:0003735, structural constituent of ribosome;GO:0005840, ribosome;GO:0006412, translation	K02970-ko03010 Ribosome	23.2915	13.7634	9.23989	9.67176	7.76335	7.92756	9.42868	9.04689	6.01201	5.24268	6.76504	4.45038	5.53602	5.32231	7.58025	5.79384	8.29108	13.6494
T_38963_c1_g1	gi|356532740|ref|XP_003534929.1| PREDICTED: putative nuclease HARBI1 [Glycine max] 2.9e-219	GO:0004518, nuclease activity;GO:0005634, nucleus;GO:0005737, cytoplasm;GO:0046872, metal ion binding	-	43.2386	87.7346	119.83	1.86221	40.5777	5.65086	296.073	154.405	103.286	180.631	278.216	45.9979	117.646	120.644	156.748	478.365	401.718	250.336
T_38965_c0_g7	gi|571489883|ref|XP_003537448.2| PREDICTED: uncharacterized protein LOC100775979 [Glycine max] 7.3e-65	-	-	66.8984	80.025	68.6032	33.7016	59.0189	41.0891	36.1668	37.8413	35.1758	41.9391	65.5076	61.6605	34.021	29.5476	23.8169	24.5402	64.4446	54.4498
T_38968_c2_g3	gi|351726379|ref|NP_001238660.1| cytokinin induced message [Glycine max] 5.0e-150	GO:0005576, extracellular region;GO:0005618, cell wall;GO:0009826, unidimensional cell growth;GO:0009828, plant-type cell wall loosening;GO:0016020, membrane;GO:0016021, integral component of membrane;GO:0019953, sexual reproduction	-	8.29485	33.538	30.163	20.8657	23.9476	10.8382	33.5481	50.1869	31.6185	66.6193	69.6592	25.9013	24.5356	69.853	39.8952	39.9811	22.0429	39.255
T_38974_c0_g1	gi|593790364|ref|XP_007158221.1| hypothetical protein PHAVU_002G134300g [Phaseolus vulgaris] 2.0e-64	GO:0000814, ESCRT II complex;GO:0005198, structural molecule activity;GO:0042803, protein homodimerization activity;GO:0043328, protein transport to vacuole involved in ubiquitin-dependent protein catabolic process via the multivesicular body sorting pathway	K12189-ko04144 Endocytosis	20.7514	11.7012	11.4568	5.39509	10.6723	10.1534	8.99953	10.5238	5.39987	6.56309	8.15494	6.38391	6.70409	5.43569	5.82831	8.86473	4.71087	12.0877
T_38980_c0_g1	gi|356511915|ref|XP_003524667.1| PREDICTED: SNAP25 homologous protein SNAP33-like [Glycine max] 3.9e-69	GO:0000911, cytokinesis by cell plate formation;GO:0005484, SNAP receptor activity;GO:0005886, plasma membrane;GO:0009504, cell plate;GO:0009507, chloroplast;GO:0009612, response to mechanical stimulus;GO:0009737, response to abscisic acid;GO:0015031, protein transport;GO:0016021, integral component of membrane;GO:0016192, vesicle-mediated transport;GO:0051707, response to other organism;GO:00610…	-	13.544	13.4193	15.1883	7.24372	12.8229	12.5966	14.6462	11.511	11.8234	11.1084	13.0823	7.13508	13.1986	9.82892	12.5167	28.6723	27.6075	36.7478
T_38992_c0_g2	gi|356553643|ref|XP_003545163.1| PREDICTED: uncharacterized protein LOC100818818 [Glycine max] 2.4e-240	-	-	7.64941	4.3127	4.46571	3.78685	2.91257	2.53419	3.43725	2.96819	1.72616	2.32192	2.91067	1.81499	1.72439	1.77571	2.60731	3.12858	3.38627	2.743
T_39011_c0_g2	gi|947122569|gb|KRH70775.1| hypothetical protein GLYMA_02G109900 [Glycine max] 2.8e-269	GO:0000398, mRNA splicing, via spliceosome;GO:0001047, core promoter binding;GO:0003713, transcription coactivator activity;GO:0003714, transcription corepressor activity;GO:0005654, nucleoplasm;GO:0006351, transcription, DNA-templated;GO:0006355, regulation of transcription, DNA-templated;GO:0006915, apoptotic process;GO:0007049, cell cycle;GO:0008284, positive regulation of cell proliferation;G…	-	27.0095	15.0799	13.5567	11.2389	4.16588	9.67895	7.66655	8.68366	7.39135	4.26487	7.37857	6.60464	5.93846	9.83728	5.41723	7.00965	6.63166	15.6274
T_39017_c0_g1	gi|947087023|gb|KRH35744.1| hypothetical protein GLYMA_10G262600 [Glycine max] 4.0e-205	GO:0004842, ubiquitin-protein transferase activity;GO:0005829, cytosol;GO:0006952, defense response;GO:0009414, response to water deprivation;GO:0010200, response to chitin;GO:0016567, protein ubiquitination;GO:0016874, ligase activity;GO:0051865, protein autoubiquitination	-	3.35298	7.6761	13.0321	0.693161	8.32932	1.58854	60.3413	19.4076	15.7906	37.4742	43.9109	1.84535	16.2577	8.6593	15.4747	207.571	130.082	81.1195
T_39024_c0_g4	gi|356576242|ref|XP_003556242.1| PREDICTED: vacuolar amino acid transporter 1 [Glycine max] 3.2e-154	GO:0000324, fungal-type vacuole;GO:0000329, fungal-type vacuole membrane;GO:0003333, amino acid transmembrane transport;GO:0005302, L-tyrosine transmembrane transporter activity;GO:0006865, amino acid transport;GO:0007034, vacuolar transport;GO:0015171, amino acid transmembrane transporter activity;GO:0015186, L-glutamine transmembrane transporter activity;GO:0015188, L-isoleucine transmembrane t…	-	2.9287	4.33081	8.1982	7.73716	11.4967	11.1884	7.20084	6.8701	8.59125	8.21653	6.41078	7.18337	9.7203	8.05853	14.1068	3.88984	5.85251	2.7071
T_39028_c0_g2	-	-	-	313.96	375.716	294.942	91.8494	72.9302	150.403	148.814	121.885	100.56	74.545	355.86	157.619	112.392	64.6693	81.5721	390.044	86.8203	168.432
T_39028_c0_g4	-	-	-	364.989	25.9092	95.3334	13.432	7.26355	31.6617	20.4248	2.44359	20.3795	18.9253	20.4584	17.3021	6.2924	10.8055	61.1635	6.79753	10.1927	49.245
T_39032_c1_g2	gi|1012353728|gb|KYP64916.1| Dehydrin COR47 [Cajanus cajan] 9.8e-16	GO:0005509, calcium ion binding;GO:0005829, cytosol;GO:0005886, plasma membrane;GO:0006950, response to stress;GO:0009269, response to desiccation;GO:0009409, response to cold;GO:0009415, response to water;GO:0009507, chloroplast;GO:0009631, cold acclimation;GO:0009737, response to abscisic acid	-	594.394	281.33	278.244	81.2343	90.6764	94.5135	185.284	165.679	76.553	91.8736	121.072	100.494	120.167	109.411	100.415	206.683	218.323	272.356
T_39035_c1_g1	gi|955340610|ref|XP_014617506.1| PREDICTED: uncharacterized protein LOC100778779 isoform X2 [Glycine max] 7.3e-193	-	-	17.7722	10.7982	8.11231	5.14514	4.61897	8.54477	7.14735	10.175	4.67176	3.81351	6.09819	4.64545	4.59999	4.38976	6.52768	6.17682	6.44161	10.5052
T_39035_c1_g4	gi|356560085|ref|XP_003548326.1| PREDICTED: methylecgonone reductase [Glycine max] 5.6e-184	GO:0016491, oxidoreductase activity;GO:1901868, ecgonine methyl ester catabolic process;GO:1901869, ecgonine methyl ester biosynthetic process;GO:1901871, ecgonone methyl ester catabolic process;GO:1901872, ecgonone methyl ester biosynthetic process	-	13.6753	11.1976	12.3357	0.153034	0.487855	0.999003	0.772409	0.610129	0.0849644	0.293563	2.37298	5.47222	1.43355	0.321153	1.16273	0.557126	3.09109	4.14386
T_39037_c0_g1	gi|947076578|gb|KRH25418.1| hypothetical protein GLYMA_12G101400 [Glycine max] 5.5e-179	GO:0003677, DNA binding;GO:0046872, metal ion binding	-	13.2424	7.46263	6.48475	2.38861	3.20786	4.89474	4.72477	6.34043	3.07888	3.36044	3.15183	1.86356	2.66447	3.98712	3.72331	3.2529	4.56493	5.11794
T_39039_c1_g1	gi|356555096|ref|XP_003545875.1| PREDICTED: uncharacterized protein LOC100795741 isoform X1 [Glycine max] 0.0e+00	-	-	10.2704	5.69001	5.03814	6.68947	5.8078	7.65802	5.43407	6.36832	3.87999	3.21373	3.20929	2.6602	3.25334	2.59019	3.70673	2.28924	2.76718	3.42015
T_39039_c2_g1	gi|356523503|ref|XP_003530377.1| PREDICTED: SART-1 family protein DOT2-like [Glycine max] 1.2e-300	GO:0000387, spliceosomal snRNP assembly;GO:0000481, maturation of 5S rRNA;GO:0005634, nucleus;GO:0005730, nucleolus;GO:0009908, flower development;GO:0009933, meristem structural organization;GO:0010087, phloem or xylem histogenesis;GO:0010305, leaf vascular tissue pattern formation;GO:0010588, cotyledon vascular tissue pattern formation;GO:0045292, mRNA cis splicing, via spliceosome;GO:0046540, …	K11984-ko03040 Spliceosome	16.6519	9.86531	5.22708	3.97439	3.63125	6.61534	3.32295	5.22775	3.42081	1.75572	3.26076	2.76602	2.38664	4.68691	2.24535	5.3061	4.88556	12.9708
T_39040_c0_g1	gi|85077297|ref|XP_956003.1| histone H3 [Neurospora crassa OR74A] 6.8e-65	GO:0000786, nucleosome;GO:0003677, DNA binding;GO:0005634, nucleus	-	0.412589	4.89872	1.81777	24.3535	3.9986	0	18.9126	17.3495	3.71261	27.5172	11.5714	8.72029	0.960447	8.96822	13.2573	1.46203	27.4659	10.6396
T_39042_c1_g1	gi|593800682|ref|XP_007163378.1| hypothetical protein PHAVU_001G229700g [Phaseolus vulgaris] 1.2e-56	GO:0005739, mitochondrion;GO:0016787, hydrolase activity;GO:0046872, metal ion binding	-	64.7137	43.2798	18.5596	13.103	18.0499	20.9872	17.7167	18.9988	13.2093	8.36833	17.0803	22.0097	16.9041	13.7249	13.6015	5.28447	20.0863	31.708
T_39042_c2_g2	gi|734408254|gb|KHN34636.1| Dof zinc finger protein DOF5.2 [Glycine soja] 2.1e-240	GO:0003677, DNA binding;GO:0003700, DNA binding transcription factor activity;GO:0005634, nucleus;GO:0006351, transcription, DNA-templated;GO:0006355, regulation of transcription, DNA-templated;GO:0009908, flower development;GO:0046872, metal ion binding	-	18.5218	15.6734	12.7579	11.8342	9.52648	9.42346	13.8308	16.6067	4.87251	9.10333	8.53085	6.07963	7.48715	4.85526	5.3514	14.3738	13.8579	12.9778
T_39042_c3_g3	gi|356510845|ref|XP_003524144.1| PREDICTED: myosin-binding protein 2 [Glycine max] 0.0e+00	GO:0016021, integral component of membrane;GO:0017022, myosin binding	-	11.7599	4.87885	3.64575	2.43934	2.39604	4.18054	3.11983	3.2526	1.7105	1.96305	2.62647	2.63427	2.42329	1.82247	1.98271	2.45402	2.87135	5.44157
T_39063_c3_g3	gi|947057786|gb|KRH07192.1| hypothetical protein GLYMA_16G073400 [Glycine max] 1.5e-87	-	-	15.4228	21.8258	18.7259	8.34295	22.0598	11.095	31.4496	32.9786	18.5987	62.4859	26.0382	13.3372	37.2799	93.5672	26.9599	69.2259	44.4789	41.1259
T_39063_c3_g5	gi|571454347|ref|XP_006579758.1| PREDICTED: uncharacterized protein LOC102667078 [Glycine max] 3.2e-79	-	-	7.87667	8.20365	8.30226	2.34483	4.0305	3.08382	11.3197	8.69371	4.5563	9.80049	8.61384	3.62052	6.3789	10.3859	6.11221	9.36082	5.68483	8.63671
T_39066_c3_g1	gi|356507919|ref|XP_003522710.1| PREDICTED: uncharacterized protein LOC100812528 [Glycine max] 5.6e-13	-	-	30.9422	10.4246	8.23754	3.4216	4.19782	7.90653	6.09958	5.21687	5.88763	1.90756	4.78039	3.94815	4.25859	4.48061	3.48725	2.67633	3.321	6.58155
T_39066_c4_g1	gi|1012350152|gb|KYP61341.1| Retrovirus-related Pol polyprotein from transposon TNT 1-94 [Cajanus cajan] 3.0e-36	GO:0003676, nucleic acid binding;GO:0004602, glutathione peroxidase activity;GO:0005737, cytoplasm;GO:0006979, response to oxidative stress;GO:0015074, DNA integration;GO:0047066, phospholipid-hydroperoxide glutathione peroxidase activity	-	42.0969	29.8899	25.1926	18.0556	15.6881	20.3619	17.5518	21.0621	12.5902	15.4689	16.3611	14.7742	13.338	13.1953	13.3793	23.342	18.6391	29.1401
T_39071_c4_g6	gi|734313846|gb|KHN01516.1| hypothetical protein glysoja_039631 [Glycine soja] 0.0e+00	-	-	72.252	41.8033	38.49	16.2998	16.1964	15.2584	32.8456	40.7454	11.8053	20.3435	27.8283	14.2184	17.9338	15.3453	27.0524	24.3581	24.2522	19.6762
T_39075_c0_g1	gi|356515921|ref|XP_003526645.1| PREDICTED: metal transporter Nramp5-like [Glycine max] 6.4e-173	GO:0005215, transporter activity;GO:0005381, iron ion transmembrane transporter activity;GO:0016021, integral component of membrane;GO:0034755, iron ion transmembrane transport;GO:0055072, iron ion homeostasis	-	16.7466	13.4373	8.23142	3.31692	2.13101	1.41167	31.95	19.3313	14.3138	2.05466	145.51	8.16634	24.9139	7.27371	186.472	3.26562	5.11734	8.55715
T_39077_c1_g3	gi|951014152|ref|XP_014510481.1| PREDICTED: probable serine/threonine-protein phosphatase 2A regulatory subunit B'' subunit TON2 [Vigna radiata var. radiata] 1.2e-256	GO:0000226, microtubule cytoskeleton organization;GO:0000913, preprophase band assembly;GO:0005509, calcium ion binding;GO:0005634, nucleus;GO:0005737, cytoplasm;GO:0005819, spindle;GO:0009524, phragmoplast;GO:0009826, unidimensional cell growth;GO:0030865, cortical cytoskeleton organization	K11583-ko04152 AMPK signaling pathway;ko03015 mRNA surveillance pathway;ko04071 Sphingolipid signaling pathway;ko04151 PI3K-Akt signaling pathway	48.8251	30.0296	29.668	18.6658	18.2231	23.0088	24.7649	25.4881	12.2459	14.2549	17.2445	13.9365	13.7224	13.3564	19.3752	16.6052	17.1716	19.424
T_39077_c1_g5	gi|571510835|ref|XP_006596336.1| PREDICTED: ethylene-responsive transcription factor RAP2-4-like [Glycine max] 5.9e-08	GO:0003677, DNA binding;GO:0003700, DNA binding transcription factor activity;GO:0005634, nucleus;GO:0006351, transcription, DNA-templated	-	57.8263	165.203	197.645	82.1988	109.913	72.4717	312.629	273.633	306.654	349.226	356.726	178.145	233.11	293.914	342.338	226.309	102.458	170.835
T_39078_c0_g1	gi|947096929|gb|KRH45514.1| hypothetical protein GLYMA_08G276100 [Glycine max] 1.3e-11	GO:0008270, zinc ion binding;GO:0016491, oxidoreductase activity;GO:0046029, mannitol dehydrogenase activity	-	118.431	51.8687	32.1313	312.88	157.419	293.349	82.7255	116.477	151.753	537.844	145.053	106.337	398.442	446.952	135.795	565.796	527.806	263.802
T_39078_c0_g2	gi|593790608|ref|XP_007158343.1| hypothetical protein PHAVU_002G144600g [Phaseolus vulgaris] 3.0e-37	GO:0008270, zinc ion binding;GO:0016491, oxidoreductase activity;GO:0046029, mannitol dehydrogenase activity	-	0	0.255543	0.669146	2.60359	1.06227	4.12026	0	6.23596	0.327641	16.1969	0	1.41853	2.63716	7.11344	0.289578	17.1107	5.2367	1.00374
T_39091_c2_g2	-	-	-	14.1582	12.1529	4.77809	1.79077	1.5479	4.48776	3.55435	2.52105	1.51134	1.93494	2.14841	3.82896	2.35038	1.1242	2.82992	0.764092	4.48784	7.75415
T_39092_c1_g1	gi|356529562|ref|XP_003533359.1| PREDICTED: protein SAR DEFICIENT 1-like [Glycine max] 6.9e-238	GO:0002229, defense response to oomycetes;GO:0003700, DNA binding transcription factor activity;GO:0005634, nucleus;GO:0006351, transcription, DNA-templated;GO:0006355, regulation of transcription, DNA-templated;GO:0006950, response to stress;GO:0009617, response to bacterium;GO:0009626, plant-type hypersensitive response;GO:0010112, regulation of systemic acquired resistance;GO:0010224, response…	-	3.1551	1.7621	0.850744	1.46666	1.38077	2.22979	3.10389	2.05942	1.45334	2.81237	2.51053	1.2073	3.78593	6.5422	1.96176	12.5568	8.15448	6.35928
T_39092_c2_g1	gi|734411837|gb|KHN36223.1| Calmodulin-like protein 1 [Glycine soja] 1.1e-91	GO:0005509, calcium ion binding;GO:0005739, mitochondrion	-	41.0224	14.1602	10.3701	9.237	7.46083	8.76951	9.04474	8.16898	4.4835	5.12511	5.92822	5.47102	4.82262	5.73404	5.13627	9.61509	6.92144	10.8075
T_39092_c3_g1	gi|593794709|ref|XP_007160393.1| hypothetical protein PHAVU_002G318100g [Phaseolus vulgaris] 6.6e-163	GO:0002229, defense response to oomycetes;GO:0003700, DNA binding transcription factor activity;GO:0005634, nucleus;GO:0006351, transcription, DNA-templated;GO:0006355, regulation of transcription, DNA-templated;GO:0006950, response to stress;GO:0009617, response to bacterium;GO:0009626, plant-type hypersensitive response;GO:0010112, regulation of systemic acquired resistance;GO:0010224, response…	-	8.89001	11.1318	33.7835	4.71336	5.70582	4.16144	14.12	8.28452	11.9816	7.66061	9.16022	5.18454	6.81884	11.3687	8.30258	54.446	63.9299	59.8361
T_39095_c0_g1	gi|734434743|gb|KHN47505.1| Myb-related protein 3R-1 [Glycine soja] 0.0e+00	GO:0003677, DNA binding;GO:0005634, nucleus	K09420-ko04151 PI3K-Akt signaling pathway	7.63323	8.39926	8.14052	5.32248	4.69889	6.57251	5.86749	6.55329	5.26142	3.85651	5.33449	4.522	4.14821	5.4073	5.84718	2.00394	3.76387	3.66881
T_39100_c2_g2	gi|356500411|ref|XP_003519025.1| PREDICTED: arginine/serine-rich coiled-coil protein 2 isoform X2 [Glycine max] 6.7e-176	-	-	24.6992	17.2262	12.588	8.87423	7.54717	11.6592	10.1464	11.4183	10.9169	9.89014	8.09594	7.07963	7.74408	8.94902	7.49061	9.47183	14.0352	15.4437
T_39101_c0_g2	gi|356497218|ref|XP_003517459.1| PREDICTED: heat stress transcription factor B-2b [Glycine max] 6.1e-68	GO:0003700, DNA binding transcription factor activity;GO:0005634, nucleus;GO:0006351, transcription, DNA-templated;GO:0010200, response to chitin;GO:0043565, sequence-specific DNA binding;GO:0045892, negative regulation of transcription, DNA-templated	-	17.2504	20.7757	24.2598	7.63139	8.28483	8.6981	17.2621	17.8366	13.2667	13.1494	21.3723	17.3993	15.0411	20.0215	17.4495	18.6841	25.3197	22.9859
T_39101_c0_g4	gi|359806614|ref|NP_001241273.1| uncharacterized protein LOC100790717 [Glycine max] 2.5e-133	GO:0005634, nucleus;GO:0005829, cytosol;GO:0005886, plasma membrane;GO:0046686, response to cadmium ion;GO:0051131, chaperone-mediated protein complex assembly;GO:0051879, Hsp90 protein binding;GO:0070678, preprotein binding	-	21.4966	17.465	15.7977	10.6833	8.86443	13.5211	12.4035	12.1156	4.97785	5.69425	8.00166	9.66365	8.03907	8.5074	8.1786	13.1707	11.465	24.1322
T_39105_c1_g2	gi|593700811|ref|XP_007150829.1| hypothetical protein PHAVU_005G184200g [Phaseolus vulgaris] 9.0e-44	-	-	62.6415	32.9074	35.2025	15.5041	22.1937	17.2534	31.818	30.5933	11.8608	17.1368	23.8959	16.1986	20.9248	12.0258	23.0794	26.3268	28.7917	42.5066
T_39107_c6_g2	gi|951041626|ref|XP_014517979.1| PREDICTED: uncharacterized protein At4g26485-like isoform X1 [Vigna radiata var. radiata] 1.2e-56	-	-	43.4519	29.3659	20.6169	7.45622	21.8886	16.9417	14.4205	13.2053	7.90642	9.27228	10.7	11.2049	15.681	9.9853	9.30255	16.1173	18.2171	22.5732
T_39110_c0_g1	-	-	-	11.4826	2.02652	3.10654	1.45695	0	1.23092	1.78066	0.654729	0.640525	0.292266	1.5201	0.314956	1.39493	0.582551	0.910571	0.167856	0	0.713847
T_39114_c0_g1	gi|734347586|gb|KHN11444.1| hypothetical protein glysoja_015339 [Glycine soja] 3.1e-164	GO:0016021, integral component of membrane	-	2.3958	6.79697	7.15531	2.33527	4.8515	1.82803	17.2747	10.4866	6.76381	12.5652	19.1172	3.88558	7.93173	5.76934	9.01966	17.6201	9.86828	7.2792
T_39115_c4_g2	gi|947126543|gb|KRH74397.1| hypothetical protein GLYMA_01G016700 [Glycine max] 4.4e-188	GO:0000287, magnesium ion binding;GO:0005524, ATP binding;GO:0005622, intracellular;GO:0010264, myo-inositol hexakisphosphate biosynthetic process;GO:0032957, inositol trisphosphate metabolic process;GO:0047325, inositol tetrakisphosphate 1-kinase activity;GO:0052725, inositol-1,3,4-trisphosphate 6-kinase activity;GO:0052726, inositol-1,3,4-trisphosphate 5-kinase activity	K00913-ko04070 Phosphatidylinositol signaling system;ko00562 Inositol phosphate metabolism	5.18324	6.04555	5.53607	6.34807	9.70477	7.49296	9.398	9.38154	11.5706	9.81843	9.693	10.4137	11.9454	13.1194	11.4437	9.28312	7.52339	5.87357
T_39118_c0_g1	gi|1012348321|gb|KYP59512.1| Pirin-like protein At1g50590 family [Cajanus cajan] 2.6e-39	GO:0005634, nucleus	-	11.7049	8.92467	14.5035	4.24005	4.24762	5.59412	4.76095	3.7736	4.87527	4.65719	5.11181	3.90326	5.59835	2.81311	4.85551	14.1029	15.1534	20.3381
T_39129_c0_g2	gi|1012332539|gb|KYP43966.1| putative membrane protein At3g27390 family [Cajanus cajan] 6.4e-240	GO:0005886, plasma membrane;GO:0016021, integral component of membrane	-	15.6966	9.90145	6.35349	2.4038	2.95108	5.48186	3.86392	4.1026	1.76548	1.99314	3.7051	3.10254	3.51731	1.54572	2.46809	2.00725	5.0275	5.72323
T_39140_c0_g1	gi|571465848|ref|XP_006583492.1| PREDICTED: TMV resistance protein N-like [Glycine max] 6.1e-123	GO:0004721, phosphoprotein phosphatase activity;GO:0005524, ATP binding;GO:0007165, signal transduction;GO:0043531, ADP binding;GO:0050832, defense response to fungus	-	8.08988	3.78115	4.42851	0.761473	0.784645	0.822643	3.3334	6.88153	1.43859	1.19313	4.02668	0.825238	1.51316	1.34447	4.44674	3.66177	1.10276	1.29091
T_39147_c3_g2	gi|1000974122|ref|XP_002515678.2| PREDICTED: vacuolar protein sorting-associated protein 26A [Ricinus communis] 1.1e-141	GO:0005771, multivesicular body;GO:0005794, Golgi apparatus;GO:0005829, cytosol;GO:0006886, intracellular protein transport;GO:0008565, protein transporter activity;GO:0016020, membrane;GO:0030904, retromer complex;GO:0031902, late endosome membrane;GO:0042147, retrograde transport, endosome to Golgi;GO:0043231, intracellular membrane-bounded organelle	K18466-ko04144 Endocytosis	54.3565	31.5431	22.2203	10.142	11.4322	17.5618	13.7926	18.2688	8.72344	8.40477	12.2734	10.0489	10.4049	8.34142	10.6594	10.4263	14.3408	21.4535
T_39150_c1_g1	gi|571534567|ref|XP_006600557.1| PREDICTED: two-component response regulator ARR12-like isoform X1 [Glycine max] 4.4e-290	GO:0000160, phosphorelay signal transduction system;GO:0003677, DNA binding;GO:0003700, DNA binding transcription factor activity;GO:0005634, nucleus;GO:0006351, transcription, DNA-templated;GO:0009736, cytokinin-activated signaling pathway	K14491-ko04075 Plant hormone signal transduction	3.21502	2.29141	1.82582	5.34147	2.2514	2.41474	5.5484	6.53082	3.20966	4.31034	4.61157	2.69374	1.41123	4.14633	2.02309	3.37174	2.1522	2.33197
T_39152_c0_g1	gi|947106143|gb|KRH54526.1| hypothetical protein GLYMA_06G191800 [Glycine max] 7.5e-07	-	-	21.4423	30.4646	22.3055	6.24723	16.9322	37.8433	14.6374	9.30449	14.4373	5.5943	5.54146	13.2742	15.5547	6.89679	3.57673	3.22229	13.6359	22.5265
T_39164_c0_g2	gi|571497455|ref|XP_006593908.1| PREDICTED: ubiquitin carboxyl-terminal hydrolase 13-like isoform X2 [Glycine max] 1.9e-43	GO:0005829, cytosol;GO:0006511, ubiquitin-dependent protein catabolic process;GO:0009506, plasmodesma;GO:0016579, protein deubiquitination;GO:0036459, thiol-dependent ubiquitinyl hydrolase activity	-	23.1199	19.1435	17.1776	13.7944	10.627	13.6633	19.8406	18.7278	13.6204	8.69452	19.6656	10.9225	16.0838	2.49493	15.2384	4.7137	8.34192	2.86543
T_39173_c0_g3	gi|571503440|ref|XP_006595109.1| PREDICTED: protein CHUP1, chloroplastic-like [Glycine max] 1.5e-261	GO:0009507, chloroplast;GO:0009658, chloroplast organization;GO:0009707, chloroplast outer membrane;GO:0009902, chloroplast relocation;GO:0016021, integral component of membrane	-	12.1847	5.30728	2.85006	2.02033	1.14325	1.59793	2.05093	3.4924	1.08813	0.755475	3.32587	1.7976	2.42362	2.96583	2.01195	2.3502	4.385	7.23381
T_39176_c0_g1	gi|593209222|ref|XP_007132495.1| hypothetical protein PHAVU_011G098900g [Phaseolus vulgaris] 1.0e-24	GO:0003677, DNA binding;GO:0003700, DNA binding transcription factor activity;GO:0005634, nucleus;GO:0006351, transcription, DNA-templated;GO:0006355, regulation of transcription, DNA-templated;GO:0010078, maintenance of root meristem identity;GO:0010479, stele development;GO:0045893, positive regulation of transcription, DNA-templated;GO:0048364, root development	-	138.747	122.703	106.842	88.822	54.838	77.5786	94.895	100.475	46.9589	55.8457	66.6883	70.3038	47.5093	57.5473	49.0948	70.0027	78.2869	110.782
T_39177_c3_g2	gi|593788538|ref|XP_007157308.1| hypothetical protein PHAVU_002G059000g [Phaseolus vulgaris] 5.7e-114	GO:0004620, phospholipase activity;GO:0004806, triglyceride lipase activity;GO:0005509, calcium ion binding;GO:0005576, extracellular region;GO:0008970, phosphatidylcholine 1-acylhydrolase activity;GO:0016020, membrane;GO:0016021, integral component of membrane;GO:0016042, lipid catabolic process;GO:0019433, triglyceride catabolic process;GO:0034638, phosphatidylcholine catabolic process;GO:00527…	-	35.3193	53.9744	94.7419	19.6656	16.9542	19.8885	29.037	21.9132	25.8552	18.7666	31.0949	53.8908	22.043	23.0479	21.8759	33.0975	50.3095	48.5915
T_39177_c3_g3	gi|356567320|ref|XP_003551869.1| PREDICTED: protein transport protein SEC13 homolog B [Glycine max] 1.3e-182	GO:0005635, nuclear envelope;GO:0005643, nuclear pore;GO:0005730, nucleolus;GO:0005783, endoplasmic reticulum;GO:0005794, Golgi apparatus;GO:0015031, protein transport;GO:0016021, integral component of membrane;GO:0016192, vesicle-mediated transport;GO:0051028, mRNA transport	K14004-ko03013 RNA transport;ko04150 mTOR signaling pathway;ko04141 Protein processing in endoplasmic reticulum	65.1038	81.1832	79.6444	99.2892	97.9355	94.038	106.133	117.273	115.775	145.937	104.438	128.279	127.919	201.297	134.315	151.056	125.982	83.703
T_39182_c1_g9	gi|356512237|ref|XP_003524827.1| PREDICTED: uncharacterized protein LOC100807379 [Glycine max] 5.0e-11	-	-	61.529	43.8625	32.3804	21.8854	34.5302	41.0819	27.9949	30.7782	21.61	20.5556	20.4347	25.3607	20.4708	20.9843	17.5946	20.0087	21.8754	31.687
T_39191_c1_g1	gi|356529941|ref|XP_003533544.1| PREDICTED: isoflavone 2'-hydroxylase-like [Glycine max] 1.5e-55	GO:0005506, iron ion binding;GO:0016020, membrane;GO:0016709, oxidoreductase activity, acting on paired donors, with incorporation or reduction of molecular oxygen, NAD(P)H as one donor, and incorporation of one atom of oxygen;GO:0020037, heme binding;GO:0033773, isoflavone 2'-hydroxylase activity;GO:0042343, indole glucosinolate metabolic process;GO:0044550, secondary metabolite biosynthetic pro…	-	1.99921	1.75555	4.41078	29.4527	10.4938	6.55895	14.0131	31.5028	22.134	48.1617	15.7487	5.53224	39.676	67.6067	12.6416	46.8444	16.8616	7.0416
T_39191_c1_g2	gi|955376810|ref|XP_003548043.3| PREDICTED: cytochrome P450 81E8 [Glycine max] 1.8e-124	GO:0004497, monooxygenase activity;GO:0005506, iron ion binding;GO:0016021, integral component of membrane;GO:0016705, oxidoreductase activity, acting on paired donors, with incorporation or reduction of molecular oxygen;GO:0020037, heme binding	-	15.244	12.4037	8.63277	17.1195	14.236	10.6855	19.9469	26.6577	11.1005	50.0641	18.8305	7.61925	35.1498	33.0129	17.3447	42.6507	32.0123	14.3876
T_39197_c0_g1	gi|955329064|ref|XP_014633052.1| PREDICTED: protein PLANT CADMIUM RESISTANCE 2-like [Glycine max] 3.6e-60	GO:0008285, negative regulation of cell proliferation;GO:0016021, integral component of membrane	-	1.82414	1.68407	2.91588	5.24055	5.92947	3.12916	5.18376	4.11564	7.50528	5.09144	5.05781	2.51155	7.9696	9.3973	5.35958	8.11505	6.6021	12.4625
T_39199_c0_g2	-	-	-	20.1989	13.3002	9.36959	78.9719	172.355	61.9133	102.22	138.734	106.229	266.71	29.7529	7.88415	186.542	345.506	22.3175	169.916	134.771	146.89
T_39199_c0_g9	gi|920694589|gb|KOM37814.1| hypothetical protein LR48_Vigan03g119600 [Vigna angularis] 7.7e-07	-	-	14.8562	8.39572	4.24345	32.1507	82.3481	40.9087	88.6178	172.719	108.264	307.991	26.0398	8.28328	287.217	665.971	28.3668	553.017	345.08	446.48
T_39201_c0_g5	gi|356530521|ref|XP_003533829.1| PREDICTED: vacuolar protein sorting-associated protein 2 homolog 2-like [Glycine max] 4.2e-91	GO:0000815, ESCRT III complex;GO:0005622, intracellular;GO:0007034, vacuolar transport;GO:0015031, protein transport	K12191-ko04144 Endocytosis	11.461	6.89532	5.23552	1.57215	1.73543	5.8797	1.87823	2.21697	1.57656	1.07587	1.72969	4.23016	2.51292	1.35056	2.1419	1.11337	1.59385	3.60546
T_39214_c0_g1	gi|571453097|ref|XP_006579363.1| PREDICTED: uncharacterized protein LOC100500158 isoform X1 [Glycine max] 1.5e-146	-	-	5.77417	8.52258	4.12718	0.835658	2.95845	9.27968	1.88535	3.65023	1.84876	0.76781	0.98029	2.04696	1.9158	0.856431	1.12108	2.01426	2.04328	4.61085
T_39217_c1_g1	gi|734387567|gb|KHN25330.1| Transmembrane protein 45B [Glycine soja] 1.6e-141	GO:0016021, integral component of membrane	-	178.784	100.956	83.7719	49.0468	51.2252	53.2647	68.8856	84.0779	37.9943	52.2627	64.3386	64.8716	100.321	63.1699	144.438	62.4025	71.0736	98.7437
T_39218_c0_g1	gi|950987324|ref|XP_014503754.1| PREDICTED: replication protein A 32 kDa subunit A isoform X1 [Vigna radiata var. radiata] 3.1e-139	GO:0003677, DNA binding;GO:0005634, nucleus;GO:0006260, DNA replication;GO:0006281, DNA repair;GO:0006310, DNA recombination;GO:0016458, gene silencing	K10739-ko03030 DNA replication;ko03420 Nucleotide excision repair;ko03430 Mismatch repair;ko03440 Homologous recombination;ko03460 Fanconi anemia pathway	8.86005	7.15716	6.54245	3.29494	7.3914	8.66547	5.05066	4.84997	5.30843	3.46363	5.57547	5.66634	3.86611	3.08976	3.44331	2.13474	5.32796	6.22413
T_39221_c0_g2	gi|223974739|gb|ACN31557.1| unknown [Zea mays] 5.8e-21	-	-	54.5195	7.65459	28.366	40.5302	3.97293	5.39672	14.9369	14.899	1.70214	31.1212	3.81484	15.6377	10.4765	4.52676	11.2814	2.49921	9.149	12.4336
T_39221_c0_g4	gi|351725025|ref|NP_001237078.1| uncharacterized protein LOC100500119 [Glycine max] 2.6e-77	-	-	5038.05	716.639	1498.66	632.848	184.645	1129.91	549.877	344.872	237.558	876.702	957.415	2065.1	3120.42	517.14	547.776	496.151	951.212	1080.31
T_39221_c0_g6	gi|700198832|gb|KGN53990.1| hypothetical protein Csa_4G243140 [Cucumis sativus] 5.2e-43	-	-	5656.52	964.216	1785.25	746.596	186.521	1314.72	637.399	413.534	304.749	1170.3	1224.31	2509.75	3573.76	650.48	581.931	650.142	1231.16	1337.94
T_39222_c0_g6	gi|1012356337|gb|KYP67523.1| 1-aminocyclopropane-1-carboxylate synthase 7 [Cajanus cajan] 6.2e-10	GO:0003824, catalytic activity;GO:0009058, biosynthetic process;GO:0009693, ethylene biosynthetic process;GO:0009835, fruit ripening;GO:0016847, 1-aminocyclopropane-1-carboxylate synthase activity;GO:0030170, pyridoxal phosphate binding;GO:0042802, identical protein binding	-	1.48864	2.76822	3.00561	5.95351	5.58208	3.51541	4.7356	9.60654	9.49138	11.6775	4.05171	2.53915	7.54992	28.8066	6.39062	13.2698	3.20269	3.05534
T_39225_c2_g1	gi|734327146|gb|KHN05703.1| hypothetical protein glysoja_024669 [Glycine soja] 1.3e-16	-	-	5.18342	6.59616	4.93569	13.9129	15.2827	11.2796	36.7513	41.6102	37.6449	40.7162	10.7286	3.18615	26.1642	45.6651	7.25048	43.2556	19.5104	26.8124
T_39229_c2_g4	gi|955074981|ref|NP_001304230.1| photosystem I reaction center subunit III, chloroplastic [Vigna radiata] 3.1e-90	GO:0009507, chloroplast;GO:0009534, chloroplast thylakoid;GO:0009535, chloroplast thylakoid membrane;GO:0009538, photosystem I reaction center;GO:0009579, thylakoid;GO:0009941, chloroplast envelope;GO:0010287, plastoglobule;GO:0015979, photosynthesis;GO:0016020, membrane;GO:0016021, integral component of membrane	K02694-ko00195 Photosynthesis	4.07576	4.73574	4.619	3.96243	3.98954	3.32133	4.77084	4.90741	5.98957	3.31916	6.80192	6.20982	10.313	7.44782	10.8659	5.2679	6.4268	6.30636
T_39234_c2_g1	gi|734429419|gb|KHN45141.1| hypothetical protein glysoja_031369 [Glycine soja] 8.8e-85	GO:0016021, integral component of membrane	-	6.59148	3.77396	3.12382	1.47662	2.43367	1.03208	6.23897	5.93942	2.24745	5.23113	7.81048	1.49542	5.1183	5.93751	7.82955	13.1008	4.75695	11.5015
T_39234_c3_g1	gi|734324196|gb|KHN04971.1| F-box protein PP2-B1 [Glycine soja] 2.3e-82	GO:0016567, protein ubiquitination;GO:0030246, carbohydrate binding	-	99.907	118.59	123.189	45.4051	68.4584	93.6597	56.2373	44.6408	56.805	47.8748	49.4544	110.137	56.5574	49.8234	53.3843	34.3413	63.1964	54.4465
T_39234_c4_g3	gi|734329574|gb|KHN06283.1| hypothetical protein glysoja_048248 [Glycine soja] 2.8e-11	-	-	9.9986	20.1871	27.8394	2.45483	4.66031	2.28286	3.07874	4.65523	7.82567	3.71232	11.8052	13.725	6.42987	8.3532	8.7178	6.26337	8.43789	15.2757
T_39236_c1_g4	-	-	-	2.82513	5.76426	7.12112	6.00943	3.17436	4.25313	13.8714	6.11307	5.71966	9.69346	6.65812	5.73512	9.21042	13.8097	9.62194	12.2187	0.885581	17.743
T_39237_c1_g4	gi|351720981|ref|NP_001238474.1| glucan endo-1,3-beta-glucosidase precursor [Glycine max] 3.6e-150	GO:0004553, hydrolase activity, hydrolyzing O-glycosyl compounds;GO:0005618, cell wall;GO:0005773, vacuole;GO:0005975, carbohydrate metabolic process;GO:0006952, defense response;GO:0008810, cellulase activity;GO:0030247, polysaccharide binding;GO:0042973, glucan endo-1,3-beta-D-glucosidase activity;GO:0046658, anchored component of plasma membrane	-	1.22195	0.501007	2.06869	11.0227	34.7436	32.1164	14.78	6.83688	51.5669	15.7688	11.9825	1.02682	16.9165	7.20189	45.4914	29.432	3.91347	3.80233
T_39237_c1_g5	-	-	-	9.68991	10.4875	27.3344	2.10154	3.66917	4.39561	7.49225	4.00794	13.1791	8.17658	15.0236	10.5856	2.89257	13.9974	3.00902	9.29538	28.8085	8.75756
T_39238_c0_g1	gi|951036628|ref|XP_014516670.1| PREDICTED: probable leucine-rich repeat receptor-like protein kinase At1g35710 isoform X1 [Vigna radiata var. radiata] 6.7e-96	GO:0004672, protein kinase activity;GO:0004674, protein serine/threonine kinase activity;GO:0005524, ATP binding;GO:0016021, integral component of membrane	-	5.82135	7.6396	7.31256	0.0695082	1.34502	0.172928	9.67022	4.07305	2.72211	2.72297	4.32666	0.940346	3.17211	0.839069	2.83781	6.42852	8.41183	9.68398
T_39241_c0_g1	gi|920692131|gb|KOM35356.1| hypothetical protein LR48_Vigan02g150600 [Vigna angularis] 1.0e-106	GO:0004722, protein serine/threonine phosphatase activity;GO:0046872, metal ion binding	-	25.0924	35.8545	50.385	11.4425	16.3007	11.7859	45.7724	32.7209	16.55	26.3294	37.9193	19.7869	25.4016	20.9256	27.4837	62.289	55.7221	51.6151
T_39243_c0_g1	gi|947065040|gb|KRH14183.1| hypothetical protein GLYMA_14G010500 [Glycine max] 0.0e+00	GO:0003824, catalytic activity;GO:0005975, carbohydrate metabolic process;GO:0047274, galactinol-sucrose galactosyltransferase activity	K06617-ko00052 Galactose metabolism	22.5834	23.6696	22.3114	6.82291	10.2156	8.36572	11.566	9.01867	7.62305	6.45043	11.0255	10.2797	10.5119	6.41774	17.0667	6.81166	11.7548	14.8515
T_39247_c1_g2	gi|947100090|gb|KRH48582.1| hypothetical protein GLYMA_07G098800 [Glycine max] 3.3e-06	-	-	1.84556	1.14932	3.00343	1.61575	3.66422	1.44046	5.5584	3.68045	15.2723	5.43111	4.43555	0.626981	8.24993	12.874	8.39153	23.488	22.7898	30.1194
T_39248_c0_g1	gi|356535851|ref|XP_003536456.1| PREDICTED: U3 small nucleolar ribonucleoprotein protein IMP3-like [Glycine max] 4.1e-92	GO:0005634, nucleus;GO:0005730, nucleolus;GO:0006364, rRNA processing;GO:0030515, snoRNA binding;GO:0030519, snoRNP binding;GO:0032040, small-subunit processome;GO:0034457, Mpp10 complex	K14560-ko03008 Ribosome biogenesis in eukaryotes	28.7448	17.9606	12.6633	5.80223	8.63868	14.0824	7.93921	9.47179	9.12009	4.86057	6.87213	4.84164	5.60277	4.70283	4.43078	7.42852	9.11696	8.90911
T_39248_c1_g1	gi|571500689|ref|XP_006594687.1| PREDICTED: coiled-coil domain-containing protein 94 homolog [Glycine max] 1.1e-170	-	-	26.6523	11.9387	9.31965	4.81661	4.92062	6.7345	6.85856	8.22302	4.66151	3.02555	6.0683	4.32665	4.14054	5.32957	5.53379	4.84606	5.0546	9.07346
T_39252_c0_g1	-	-	-	21.5737	10.2643	9.5373	5.69172	8.50094	7.88978	5.9672	8.86606	4.80088	5.26009	4.29067	3.23235	6.82822	7.01578	4.81776	6.95242	7.29881	9.07731
T_39252_c0_g2	gi|955381333|ref|XP_003550742.3| PREDICTED: U-box domain-containing protein 19-like [Glycine max] 0.0e+00	GO:0004842, ubiquitin-protein transferase activity;GO:0005634, nucleus;GO:0005737, cytoplasm;GO:0010029, regulation of seed germination;GO:0016874, ligase activity	-	8.61188	28.8724	27.9549	0.748569	0.572617	0.357628	2.56716	2.90942	2.5145	4.68245	21.4514	21.3758	2.11928	4.16629	2.73529	11.7042	13.2474	11.7576
T_39254_c0_g2	gi|734324249|gb|KHN05024.1| Peroxidase 47 [Glycine soja] 4.7e-88	GO:0004601, peroxidase activity;GO:0005576, extracellular region;GO:0006979, response to oxidative stress;GO:0009505, plant-type cell wall;GO:0009664, plant-type cell wall organization;GO:0016021, integral component of membrane;GO:0020037, heme binding;GO:0042744, hydrogen peroxide catabolic process;GO:0046872, metal ion binding	K00430-ko00940 Phenylpropanoid biosynthesis	180.603	165.607	134.611	19.8662	26.2732	41.858	23.1858	25.8607	12.7889	26.632	47.0341	40.8257	48.6147	27.4228	62.2118	32.5815	169.306	196.323
T_39257_c2_g2	gi|950989531|ref|XP_014504175.1| PREDICTED: heat stress transcription factor B-4b-like [Vigna radiata var. radiata] 1.9e-84	GO:0003700, DNA binding transcription factor activity;GO:0005634, nucleus;GO:0006351, transcription, DNA-templated;GO:0043565, sequence-specific DNA binding	-	8.43096	7.10564	3.74731	2.17375	3.81266	13.0957	3.88349	3.58286	5.01772	2.82234	2.1581	5.04715	3.05295	1.54205	1.63637	1.06381	3.03608	4.09621
T_39257_c2_g6	gi|920677957|gb|KOM25125.1| hypothetical protein LR48_Vigan50s004500 [Vigna angularis] 7.2e-61	GO:0003700, DNA binding transcription factor activity;GO:0005634, nucleus;GO:0005737, cytoplasm;GO:0006351, transcription, DNA-templated;GO:0043565, sequence-specific DNA binding	-	7.19995	7.14721	6.13607	1.32666	0.888708	1.45555	1.72464	1.53447	0.737196	1.50737	1.1293	1.41545	1.75615	1.35671	2.30254	1.81377	3.78696	9.43477
T_39260_c2_g1	gi|356516698|ref|XP_003527030.1| PREDICTED: uncharacterized protein LOC100813476 [Glycine max] 4.9e-83	-	-	26.7001	14.0475	6.99378	5.38991	6.72541	12.7655	4.64584	5.48718	3.50009	4.29052	5.44599	6.23438	4.7603	3.29251	4.5028	2.20254	6.78802	7.39998
T_39260_c2_g2	gi|947087217|gb|KRH35938.1| hypothetical protein GLYMA_10G273200 [Glycine max] 4.8e-68	GO:0016021, integral component of membrane	-	2.86572	7.2127	16.3054	0.375447	4.3332	0.507063	13.4327	4.41774	27.3825	12.0372	30.2021	5.47762	8.39025	7.0778	15.6154	47.8969	52.0484	35.522
T_39263_c3_g1	-	-	-	7.69536	5.07958	3.69191	1.09235	1.60806	1.70194	2.09836	2.1829	0.484681	1.02471	1.33303	1.28564	2.537	0.686066	1.20324	1.67025	2.89325	5.39952
T_39265_c2_g4	gi|356500057|ref|XP_003518851.1| PREDICTED: probable carboxylesterase 2 [Glycine max] 5.0e-182	GO:0008152, metabolic process;GO:0016787, hydrolase activity;GO:0052689, carboxylic ester hydrolase activity	-	1.52529	2.77356	3.26824	6.72163	5.11373	4.46584	6.52846	5.53122	6.53834	7.12501	6.30509	5.37663	7.43937	11.116	4.12837	8.78114	4.37247	2.89021
T_39266_c0_g1	gi|920692314|gb|KOM35539.1| hypothetical protein LR48_Vigan02g168900 [Vigna angularis] 6.3e-89	GO:0005737, cytoplasm;GO:0005874, microtubule	-	38.8581	25.0834	21.6312	11.0109	12.5809	20.5794	13.0982	12.3773	11.9796	6.98842	12.6577	11.4613	13.0724	6.22518	10.4417	7.70865	12.0184	17.085
T_39268_c2_g4	gi|734415040|gb|KHN37520.1| hypothetical protein glysoja_034386 [Glycine soja] 3.9e-27	-	-	2.68181	3.13086	2.39317	2.94467	1.51412	0.921549	3.14702	2.74472	2.39527	2.3736	2.28626	0.623112	3.58496	4.87277	1.53307	7.45905	3.00151	7.14681
T_39268_c2_g5	gi|734312712|gb|KHN00890.1| Protein IDA-LIKE 1 [Glycine soja] 1.8e-35	GO:0005102, signaling receptor binding;GO:0005576, extracellular region;GO:0005615, extracellular space;GO:0009723, response to ethylene;GO:0010102, lateral root morphogenesis;GO:0010227, floral organ abscission;GO:0010468, regulation of gene expression;GO:0045490, pectin catabolic process;GO:0048046, apoplast	-	0.600006	0.885199	2.44636	1.88778	1.09717	0.509001	2.29825	1.08091	1.57001	3.25113	3.28323	1.73791	1.09627	0.520969	0.773251	9.68577	3.00014	5.31192
T_39273_c0_g2	gi|951070210|ref|XP_014490614.1| PREDICTED: elongation factor Tu, chloroplastic [Vigna radiata var. radiata] 6.2e-229	GO:0003746, translation elongation factor activity;GO:0003924, GTPase activity;GO:0005525, GTP binding;GO:0005622, intracellular;GO:0005739, mitochondrion;GO:0009507, chloroplast;GO:0070125, mitochondrial translational elongation	-	10.1101	12.5054	12.309	25.7074	21.9478	15.5236	19.0581	19.3076	24.0626	24.5361	22.4185	24.9948	19.972	24.3891	28.796	22.4667	15.0136	11.3169
T_39276_c0_g3	gi|356512762|ref|XP_003525085.1| PREDICTED: probable ATP synthase 24 kDa subunit, mitochondrial [Glycine max] 9.5e-102	GO:0005507, copper ion binding;GO:0005730, nucleolus;GO:0005739, mitochondrion;GO:0005753, mitochondrial proton-transporting ATP synthase complex;GO:0008270, zinc ion binding;GO:0009507, chloroplast;GO:0009555, pollen development;GO:0016020, membrane;GO:0045263, proton-transporting ATP synthase complex, coupling factor F(o);GO:0050897, cobalt ion binding	-	115.969	87.511	78.9271	32.1698	85.91	88.9875	57.8479	58.2153	29.865	38.566	41.087	37.0186	51.3488	31.8555	38.8207	44.3646	47.1374	79.5668
T_39280_c1_g2	-	-	-	6.42589	2.46773	1.93836	1.71388	2.00086	1.61233	1.60655	7.88529	1.42276	9.11511	4.64307	1.73758	9.44273	10.8944	4.82641	20.7749	16.0326	13.1175
T_39287_c2_g3	gi|955394183|ref|XP_003555775.3| PREDICTED: hydrophobic protein RCI2B [Glycine max] 2.1e-07	GO:0009409, response to cold;GO:0016021, integral component of membrane	-	189.948	199.813	306.36	13.7843	18.1209	13.9341	32.6713	24.203	24.9184	24.0482	99.9023	97.8639	25.0484	19.8765	24.411	52.0727	35.8213	76.9583
T_39287_c2_g6	gi|356572886|ref|XP_003554596.1| PREDICTED: hydrophobic protein RCI2B [Glycine max] 5.5e-17	GO:0005886, plasma membrane;GO:0009409, response to cold;GO:0009414, response to water deprivation;GO:0009651, response to salt stress;GO:0009737, response to abscisic acid;GO:0016021, integral component of membrane	-	190.105	202.198	190.829	90.7758	141.993	264.368	74.9868	81.304	111.958	87.9438	85.9959	227.105	176.33	95.0619	66.0694	74.5653	138.792	152.741
T_39291_c3_g4	gi|356504543|ref|XP_003521055.1| PREDICTED: uncharacterized protein LOC100785599 isoform X1 [Glycine max] 3.0e-18	GO:0016021, integral component of membrane	-	2.75165	1.95206	2.54744	2.10463	3.62953	1.90115	4.37204	4.62285	3.47624	5.84578	3.72459	1.94115	5.05937	6.60106	4.07571	7.67603	4.73404	8.00826
T_39297_c1_g1	gi|955318831|ref|XP_014630794.1| PREDICTED: uncharacterized protein LOC100527562 isoform X1 [Glycine max] 1.6e-95	-	-	9.27793	5.87488	6.02938	1.81784	2.79575	3.40237	3.76156	7.03732	3.41868	3.59979	4.98614	2.99896	3.45258	4.79033	3.6485	4.02251	4.59506	4.25126
T_39300_c2_g2	gi|947111464|gb|KRH59790.1| hypothetical protein GLYMA_05G2031002, partial [Glycine max] 3.0e-144	GO:0003677, DNA binding;GO:0005634, nucleus;GO:0043292, contractile fiber;GO:2001032, regulation of double-strand break repair via nonhomologous end joining	-	8.04485	4.1937	3.34	1.31568	1.09083	3.21678	1.75717	1.56025	1.49651	0.70965	1.5482	1.18844	1.49621	0.930182	1.1292	0.868964	1.37969	2.68482
T_39302_c1_g1	gi|734325740|gb|KHN05326.1| Stem 28 kDa glycoprotein [Glycine soja] 5.5e-132	GO:0003993, acid phosphatase activity;GO:0045735, nutrient reservoir activity	-	653.811	505.35	387.02	284.333	630.063	336.947	354.923	338.349	180.174	219.105	344.229	232.006	187.337	149.352	275.133	239.741	206.541	371.981
T_39312_c0_g1	gi|734401493|gb|KHN31680.1| Putative ribosomal RNA methyltransferase NOP2 [Glycine soja] 4.8e-257	GO:0003723, RNA binding;GO:0005730, nucleolus;GO:0006364, rRNA processing;GO:0008284, positive regulation of cell proliferation;GO:0008757, S-adenosylmethionine-dependent methyltransferase activity	-	24.761	15.3825	13.2248	12.6407	11.5926	16.7547	11.526	9.54194	8.7305	5.52624	8.16559	8.70419	6.81603	4.76262	5.88431	4.40602	5.43494	8.25076
T_39313_c1_g3	-	-	-	17.782	27.9444	33.7475	6.27493	10.1908	10.5329	18.0617	15.4149	11.0679	12.5002	13.5462	8.55569	12.1891	13.2483	9.79444	16.915	20.7193	28.1747
T_39319_c0_g2	gi|734415015|gb|KHN37495.1| Putative carboxylesterase 2 [Glycine soja] 2.3e-147	GO:0008152, metabolic process;GO:0016787, hydrolase activity;GO:0052689, carboxylic ester hydrolase activity	-	22.6417	25.8836	24.2098	57.9811	47.2926	31.7464	39.1952	47.0595	52.6368	59.8823	43.4996	39.0691	44.5517	67.9511	50.4022	72.6328	43.6203	39.1036
T_39322_c0_g1	gi|356577692|ref|XP_003556958.1| PREDICTED: CSC1-like protein RXW8 isoform X1 [Glycine max] 0.0e+00	GO:0006811, ion transport;GO:0016021, integral component of membrane	-	7.87866	5.74054	5.16278	1.22652	1.35702	4.39854	2.29701	2.15432	1.98274	1.24223	2.71544	2.47792	2.10246	1.31374	1.25468	0.660714	3.20045	3.02576
T_39322_c0_g2	gi|356544720|ref|XP_003540795.1| PREDICTED: probable magnesium transporter NIPA6 isoform X1 [Glycine max] 3.5e-72	GO:0005769, early endosome;GO:0005886, plasma membrane;GO:0015095, magnesium ion transmembrane transporter activity;GO:0015693, magnesium ion transport;GO:0016021, integral component of membrane	-	18.9845	18.7107	20.9782	6.93781	9.24461	13.555	11.2282	7.92336	10.8531	6.05594	9.91231	11.1116	9.90093	7.15377	8.53661	8.3606	11.469	12.8312
T_39322_c0_g5	gi|571458258|ref|XP_006581103.1| PREDICTED: probable magnesium transporter NIPA6 [Glycine max] 1.7e-168	GO:0005769, early endosome;GO:0005886, plasma membrane;GO:0015095, magnesium ion transmembrane transporter activity;GO:0015693, magnesium ion transport;GO:0016021, integral component of membrane	-	13.4462	13.6863	6.03225	3.09993	4.52322	10.7358	3.15707	1.91356	5.63675	1.19123	6.30069	8.63536	8.14292	2.62952	5.09533	2.74334	6.0488	9.21177
T_39328_c0_g1	-	-	-	166.656	217.332	147.381	153.008	112.797	223.652	149.536	221.63	139.171	131.507	129.615	258.596	161.723	228.694	144.317	28.7142	66.9227	98.5025
T_39335_c1_g7	gi|571505389|ref|XP_006595501.1| PREDICTED: uncharacterized protein LOC100499778 isoform X1 [Glycine max] 5.7e-31	GO:0016021, integral component of membrane	-	86.1978	96.7974	102.249	97.951	115.539	118.039	132.829	149.77	149.998	163.519	130.632	109.236	143.287	292.592	139.848	170.935	134.163	127.55
T_39336_c0_g1	gi|356544390|ref|XP_003540635.1| PREDICTED: peter Pan-like protein [Glycine max] 4.9e-127	GO:0000027, ribosomal large subunit assembly;GO:0019843, rRNA binding;GO:0030687, preribosome, large subunit precursor	-	31.6603	20.5389	15.7077	12.9645	14.0855	19.4566	16.0452	14.0824	12.2094	9.13822	10.6368	10.0352	9.79726	9.50516	8.05501	8.23342	12.8772	13.5931
T_39336_c1_g1	gi|356507724|ref|XP_003522614.1| PREDICTED: EIN3-binding F-box protein 1-like isoform X1 [Glycine max] 0.0e+00	GO:0005634, nucleus;GO:0006511, ubiquitin-dependent protein catabolic process;GO:0009723, response to ethylene;GO:0009873, ethylene-activated signaling pathway;GO:0010105, negative regulation of ethylene-activated signaling pathway;GO:0016567, protein ubiquitination	K14515-ko04016 MAPK signaling pathway - plant;ko04075 Plant hormone signal transduction	44.9069	41.7714	30.419	148.4	60.5649	75.4261	39.462	64.8789	67.5705	61.5782	39.0748	64.0497	57.0471	85.2458	54.0877	39.8506	30.378	26.1496
T_39336_c1_g4	gi|356552519|ref|XP_003544614.1| PREDICTED: EIN3-binding F-box protein 1-like [Glycine max] 0.0e+00	GO:0005634, nucleus;GO:0006511, ubiquitin-dependent protein catabolic process;GO:0009723, response to ethylene;GO:0009873, ethylene-activated signaling pathway;GO:0010105, negative regulation of ethylene-activated signaling pathway;GO:0016567, protein ubiquitination	K14515-ko04016 MAPK signaling pathway - plant;ko04075 Plant hormone signal transduction	58.001	62.7505	66.0381	220.458	111.09	149.933	88.8109	91.6822	155.55	125.37	90.8418	111.902	116.478	198.464	118.997	108.229	99.0828	64.5491
T_39339_c0_g2	gi|947042705|gb|KRG92429.1| hypothetical protein GLYMA_20G210400 [Glycine max] 2.1e-77	GO:0003700, DNA binding transcription factor activity;GO:0005634, nucleus;GO:0006351, transcription, DNA-templated;GO:0006355, regulation of transcription, DNA-templated;GO:0009733, response to auxin;GO:0009734, auxin-activated signaling pathway;GO:0010102, lateral root morphogenesis;GO:0045892, negative regulation of transcription, DNA-templated	K14484-ko04075 Plant hormone signal transduction	150.283	165.734	201.092	89.3698	179.533	207.569	90.6501	72.5395	87.7657	70.5742	98.9249	116.094	116.28	64.8172	83.3261	86.856	111.51	144.737
T_39346_c0_g1	gi|734314017|gb|KHN01564.1| hypothetical protein glysoja_037918 [Glycine soja] 1.3e-123	GO:0016021, integral component of membrane	-	13.9008	5.6561	3.23984	2.47908	1.19599	3.92711	3.01857	3.18027	1.89465	1.21584	2.11417	2.30155	1.94453	1.64355	1.63999	1.98966	2.77897	4.55912
T_39347_c1_g2	gi|571532084|ref|XP_006600172.1| PREDICTED: uncharacterized protein LOC100788399 isoform X1 [Glycine max] 7.7e-89	GO:0008233, peptidase activity	-	32.0583	28.6298	26.8152	14.7036	23.8647	25.0029	17.7027	16.7408	12.9136	11.3878	10.8518	15.1429	14.2805	8.31148	11.8249	10.5712	17.8015	20.7269
T_39351_c0_g9	gi|359807103|ref|NP_001241602.1| uncharacterized protein LOC100805881 [Glycine max] 8.2e-95	-	-	13.0672	9.38163	10.3203	3.09031	3.74583	4.47736	8.85706	9.15223	5.08221	5.41036	10.3242	6.61052	5.47783	5.25321	7.23098	10.4822	10.7397	15.101
T_39355_c1_g4	gi|955303437|ref|XP_003517222.3| PREDICTED: isoflavone reductase-like protein [Glycine max] 1.4e-92	GO:0005737, cytoplasm;GO:0016021, integral component of membrane;GO:0016491, oxidoreductase activity	-	38.7773	42.4746	52.8179	181.5	196.796	113.964	155.723	170.326	162.297	186.53	122.112	38.8431	120.012	143.4	68.3467	148.168	113.633	86.292
T_39356_c2_g2	gi|356568988|ref|XP_003552689.1| PREDICTED: enoyl-CoA delta isomerase 1, peroxisomal [Glycine max] 1.9e-106	GO:0003824, catalytic activity;GO:0004165, dodecenoyl-CoA delta-isomerase activity;GO:0005777, peroxisome;GO:0006635, fatty acid beta-oxidation;GO:0008152, metabolic process;GO:0009062, fatty acid catabolic process	-	18.3775	26.4198	25.8153	30.6707	28.9746	19.7848	37.3618	34.1702	41.3497	52.2921	55.2909	34.5887	39.788	45.6964	44.7774	71.8069	60.7563	44.0953
T_39356_c3_g1	gi|947065689|gb|KRH14832.1| hypothetical protein GLYMA_14G051500 [Glycine max] 1.5e-200	GO:0005634, nucleus	-	15.1405	4.88629	3.14228	1.47931	2.26221	3.17309	3.07577	2.34114	3.28145	1.7448	5.95247	3.65205	2.89453	2.71299	2.7166	2.31993	2.20484	2.22853
T_39357_c0_g1	gi|356495966|ref|XP_003516841.1| PREDICTED: UDP-glycosyltransferase 83A1-like [Glycine max] 7.7e-147	GO:0009813, flavonoid biosynthetic process;GO:0043231, intracellular membrane-bounded organelle;GO:0052696, flavonoid glucuronidation;GO:0080043, quercetin 3-O-glucosyltransferase activity;GO:0080044, quercetin 7-O-glucosyltransferase activity	-	0.0621185	2.0833	0.893311	12.6887	9.43274	3.46945	2.90544	13.5384	3.38257	33.8679	3.00952	0.26649	8.09763	20.2739	3.22564	22.5554	8.22769	6.07587
T_39359_c1_g4	gi|734338418|gb|KHN08793.1| U-box domain-containing protein 21 [Glycine soja] 1.1e-203	GO:0004842, ubiquitin-protein transferase activity;GO:0010200, response to chitin;GO:0016874, ligase activity	-	33.8931	83.8214	126.691	2.8661	41.1373	5.2852	275.768	168.545	80.0158	223.79	252.877	35.7566	106.717	95.2488	123.161	634.576	358.861	296.072
T_39359_c1_g5	gi|960491942|ref|XP_014751185.1| PREDICTED: uncharacterized protein LOC100841093 [Brachypodium distachyon] 1.3e-38	GO:0000786, nucleosome;GO:0003677, DNA binding;GO:0005634, nucleus;GO:0005730, nucleolus;GO:0005774, vacuolar membrane;GO:0005829, cytosol;GO:0005886, plasma membrane;GO:0006334, nucleosome assembly;GO:0009506, plasmodesma;GO:0009507, chloroplast;GO:0009579, thylakoid	-	207.331	180.185	149.235	51.7707	148.637	199.629	72.7241	85.8277	76.6292	79.3622	84.9383	133.811	109.482	70.8313	81.0277	75.0997	140.458	138.54
T_39369_c1_g1	gi|1012334228|gb|KYP45595.1| Secologanin synthase [Cajanus cajan] 5.8e-165	GO:0004497, monooxygenase activity;GO:0005506, iron ion binding;GO:0016021, integral component of membrane;GO:0016705, oxidoreductase activity, acting on paired donors, with incorporation or reduction of molecular oxygen;GO:0020037, heme binding	-	2.48052	1.84487	1.56995	2.12477	2.28282	0.952727	2.21572	3.97244	3.28372	3.05726	5.33069	1.00766	9.55067	3.80562	11.1074	2.73734	6.32838	9.01893
T_39378_c0_g1	gi|734408805|gb|KHN34912.1| E3 ubiquitin-protein ligase HOS1 [Glycine soja] 1.0e-268	GO:0004842, ubiquitin-protein transferase activity;GO:0005634, nucleus;GO:0005737, cytoplasm;GO:0009409, response to cold;GO:0009966, regulation of signal transduction;GO:0010228, vegetative to reproductive phase transition of meristem;GO:0016567, protein ubiquitination;GO:0016874, ligase activity;GO:0045892, negative regulation of transcription, DNA-templated;GO:0046872, metal ion binding	-	6.81867	5.30096	4.38849	2.6149	2.92597	4.33036	3.40564	3.85121	2.2007	2.07617	2.39951	2.35449	2.06492	1.28864	2.87497	2.65964	2.33109	2.99252
T_39379_c0_g1	-	-	-	0.230426	2.94293	1.14089	4.16742	3.19544	0.222218	1.71137	2.31928	1.83738	4.32425	1.52537	0.413297	1.37477	11.5562	0.603843	21.3409	7.158	5.1454
T_39380_c0_g2	gi|356497749|ref|XP_003517721.1| PREDICTED: protein bfr2-like [Glycine max] 7.1e-85	-	-	95.6071	133.19	134.695	8.98555	51.3227	19.1565	231.723	131.766	70.5085	186.188	254.635	59.9559	129.636	155.387	167.259	552.27	424.201	461.293
T_39381_c0_g13	gi|1012346588|gb|KYP57780.1| Glucan endo-1,3-beta-glucosidase 5 [Cajanus cajan] 1.7e-270	GO:0004553, hydrolase activity, hydrolyzing O-glycosyl compounds;GO:0005773, vacuole;GO:0005886, plasma membrane;GO:0005975, carbohydrate metabolic process;GO:0006952, defense response;GO:0009505, plant-type cell wall;GO:0009506, plasmodesma;GO:0030247, polysaccharide binding;GO:0031225, anchored component of membrane;GO:0042973, glucan endo-1,3-beta-D-glucosidase activity;GO:0046658, anchored co…	-	16.5384	11.4051	13.1957	5.15768	8.05036	10.2205	6.80906	3.64532	4.10257	4.33126	4.60702	11.2055	8.97478	5.75834	7.99224	3.95921	8.06473	7.65176
T_39382_c0_g2	gi|356550285|ref|XP_003543518.1| PREDICTED: uncharacterized protein C24B11.05-like [Glycine max] 2.0e-87	GO:0008152, metabolic process;GO:0016787, hydrolase activity	-	22.2387	17.0011	23.4439	6.94128	12.188	12.8419	8.59282	7.94673	7.86325	5.37832	7.29756	7.77171	10.8972	6.59462	7.27109	12.18	14.9966	19.8671
T_39383_c2_g3	gi|593801124|ref|XP_007163599.1| hypothetical protein PHAVU_001G248000g [Phaseolus vulgaris] 3.0e-157	GO:0005290, L-histidine transmembrane transporter activity;GO:0005887, integral component of plasma membrane;GO:0006814, sodium ion transport;GO:0006867, asparagine transport;GO:0006868, glutamine transport;GO:0007420, brain development;GO:0007565, female pregnancy;GO:0015180, L-alanine transmembrane transporter activity;GO:0015182, L-asparagine transmembrane transporter activity;GO:0015186, L-gl…	-	21.9063	27.9313	31.1434	34.1163	31.9447	29.7795	41.9979	43.9022	45.6917	39.0796	41.3689	45.3268	44.7442	58.4682	68.2826	46.0914	31.2793	30.1716
T_39383_c2_g7	gi|356515122|ref|XP_003526250.1| PREDICTED: uncharacterized protein LOC100789033 [Glycine max] 4.8e-40	-	-	122.593	167.879	166.434	90.3852	173.181	90.9962	304.376	254.703	285.032	312.133	386.109	194.656	249.007	272.929	281.013	340.911	332.688	309.732
T_39390_c3_g2	gi|734319288|gb|KHN03328.1| Major allergen Pru av 1 [Glycine soja] 6.3e-47	GO:0004864, protein phosphatase inhibitor activity;GO:0005634, nucleus;GO:0005737, cytoplasm;GO:0006952, defense response;GO:0009607, response to biotic stimulus;GO:0009736, cytokinin-activated signaling pathway;GO:0009738, abscisic acid-activated signaling pathway;GO:0009877, nodulation;GO:0010427, abscisic acid binding;GO:0080163, regulation of protein serine/threonine phosphatase activity	-	18.755	13.1609	4.76208	37.303	26.7404	18.3787	7.03959	4.1403	4.9324	4.54855	9.75908	0.393393	21.5645	8.5579	1.65916	10.2169	11.8361	13.9587
T_39394_c0_g2	gi|734354190|gb|KHN13628.1| Putative LRR receptor-like serine/threonine-protein kinase [Glycine soja] 3.7e-48	GO:0004672, protein kinase activity;GO:0004674, protein serine/threonine kinase activity;GO:0005524, ATP binding;GO:0016021, integral component of membrane	-	9.39217	5.80767	8.61389	2.65563	1.02964	0.46787	5.38652	3.31915	2.48194	2.02	3.15457	2.34309	0.47302	1.26311	3.47418	6.78593	14.8388	5.05835
T_39394_c0_g3	gi|1012326322|gb|KYP38138.1| putative LRR receptor-like serine/threonine-protein kinase At4g26540 family [Cajanus cajan] 2.4e-30	GO:0004672, protein kinase activity;GO:0005524, ATP binding;GO:0016021, integral component of membrane	-	23.8491	12.6419	5.95202	5.88431	6.90624	4.99344	6.21991	9.73697	2.31728	5.56461	3.71956	6.25147	1.21697	1.46962	5.1419	3.39061	7.92614	8.54952
T_39403_c2_g3	gi|356572140|ref|XP_003554228.1| PREDICTED: dirigent protein 1-like [Glycine max] 5.7e-94	GO:0009699, phenylpropanoid biosynthetic process;GO:0042349, guiding stereospecific synthesis activity;GO:0048046, apoplast	-	17.5807	26.4658	13.548	47.7855	40.0753	29.5498	17.4504	25.0709	16.1643	35.8863	20.6112	12.3143	27.1269	43.116	9.1362	36.7527	36.04	24.2853
T_39403_c4_g1	gi|356506040|ref|XP_003521796.1| PREDICTED: mitochondrial carrier protein MTM1-like [Glycine max] 1.6e-182	GO:0003735, structural constituent of ribosome;GO:0005215, transporter activity;GO:0005739, mitochondrion;GO:0005743, mitochondrial inner membrane;GO:0006412, translation;GO:0006828, manganese ion transport;GO:0016021, integral component of membrane;GO:0016530, metallochaperone activity;GO:0055085, transmembrane transport;GO:1901562, response to paraquat	-	8.49925	6.76844	3.15659	3.13466	1.81059	3.17688	2.85674	2.72003	1.63037	2.10047	2.98597	1.75073	0.990638	1.41797	2.17769	2.21182	2.35745	3.0551
T_39408_c4_g2	gi|955328415|ref|XP_003529998.3| PREDICTED: uncharacterized protein LOC100775891 [Glycine max] 4.2e-69	GO:0016021, integral component of membrane	-	58.7699	73.5859	62.6287	85.4636	65.9481	63.775	77.1416	96.1829	109.001	94.0807	98.1607	105.206	106.555	153.846	134.868	118.471	99.343	87.8567
T_39412_c2_g3	gi|356505528|ref|XP_003521542.1| PREDICTED: BTB/POZ domain-containing protein At1g03010-like isoform X1 [Glycine max] 0.0e+00	GO:0009860, pollen tube growth;GO:0016567, protein ubiquitination	-	5.44951	4.75356	4.84682	1.34602	2.56984	2.23361	2.76518	1.90394	0.948721	1.07677	1.58406	1.54935	1.92969	1.50727	2.42828	2.32791	4.1655	4.79049
T_39414_c1_g2	gi|734384092|gb|KHN24232.1| hypothetical protein glysoja_037066 [Glycine soja] 1.0e-20	-	-	13.3489	19.923	31.6648	40.8916	29.0353	20.9905	43.6241	45.9111	46.178	38.8133	52.4998	27.5866	32.4462	13.3336	54.9679	10.5666	15.1404	5.53186
T_39416_c3_g2	-	-	-	2.57292	2.04677	1.93643	2.41617	1.87918	0.86635	2.04732	2.56505	2.45223	2.01689	1.70331	2.68999	2.84684	9.124	3.56925	3.53367	0.75886	2.97664
T_39416_c5_g3	-	-	-	14.5151	14.2681	11.999	210.082	102.244	64.05	48.2163	62.9575	97.2899	270.934	12.8951	21.1924	166.22	486.559	10.7553	351.519	35.2946	105.136
T_39424_c3_g1	gi|734426144|gb|KHN43714.1| Zeatin O-glucosyltransferase [Glycine soja] 3.3e-101	GO:0008152, metabolic process;GO:0050403, trans-zeatin O-beta-D-glucosyltransferase activity;GO:0050502, cis-zeatin O-beta-D-glucosyltransferase activity	-	8.05003	9.76907	6.56365	12.6565	9.35515	12.3684	19.0355	11.43	9.76392	18.6674	21.1738	6.02008	16.5708	22.4251	16.9669	12.194	18.6194	24.4943
T_39424_c3_g2	gi|571445465|ref|XP_003521165.2| PREDICTED: zeatin O-glucosyltransferase-like [Glycine max] 1.5e-257	GO:0008152, metabolic process;GO:0016758, transferase activity, transferring hexosyl groups;GO:0050403, trans-zeatin O-beta-D-glucosyltransferase activity	K13495-ko00908 Zeatin biosynthesis	7.37301	9.71119	8.14295	8.88647	10.0807	11.0951	8.94767	8.72126	12.1667	12.1326	14.4107	9.41557	16.4091	14.7403	19.8436	10.6997	10.7652	7.19615
T_39432_c0_g2	gi|571470187|ref|XP_006584945.1| PREDICTED: probably inactive leucine-rich repeat receptor-like protein kinase At5g48380 [Glycine max] 4.8e-151	GO:0004672, protein kinase activity;GO:0004714, transmembrane receptor protein tyrosine kinase activity;GO:0005524, ATP binding;GO:0005886, plasma membrane;GO:0009506, plasmodesma;GO:0016021, integral component of membrane;GO:0016301, kinase activity;GO:0031348, negative regulation of defense response;GO:0033612, receptor serine/threonine kinase binding;GO:0042742, defense response to bacterium;G…	-	14.0126	7.33149	4.79997	1.05018	2.18022	1.41097	6.86006	6.70454	1.20254	3.8884	3.61753	1.7008	3.00786	1.22318	1.98824	6.51574	3.9036	9.73174
T_39433_c3_g5	gi|955382072|ref|XP_014625774.1| PREDICTED: protein QUIRKY-like isoform X2 [Glycine max] 0.0e+00	GO:0005509, calcium ion binding;GO:0005544, calcium-dependent phospholipid binding;GO:0005886, plasma membrane;GO:0016021, integral component of membrane;GO:0016757, transferase activity, transferring glycosyl groups	-	6.1823	5.94526	8.34451	12.0342	9.2634	4.90808	11.6879	12.6786	17.6861	14.3488	19.245	6.86781	12.3773	16.6692	22.5215	20.0293	16.1814	13.2403
T_39447_c1_g3	gi|571526653|ref|XP_006599132.1| PREDICTED: MLP-like protein 43 [Glycine max] 4.3e-76	GO:0006952, defense response;GO:0009507, chloroplast;GO:0009607, response to biotic stimulus	-	122.441	61.5142	48.3964	29.2146	48.6964	43.6065	44.9063	57.5367	21.7204	28.5942	32.2601	25.8354	35.6213	25.2373	30.0813	33.8845	35.9182	50.1372
T_39449_c0_g1	gi|356557410|ref|XP_003547009.1| PREDICTED: zinc transporter 1-like [Glycine max] 1.6e-167	GO:0005385, zinc ion transmembrane transporter activity;GO:0005886, plasma membrane;GO:0006829, zinc ion transport;GO:0016020, membrane;GO:0016021, integral component of membrane;GO:0071577, zinc ion transmembrane transport	-	6.3928	8.69829	22.0043	18.9253	20.5971	9.32024	43.9954	39.193	87.3793	80.7495	45.863	15.686	52.8785	57.3416	82.1777	35.0553	31.887	27.1948
T_39450_c3_g1	gi|571493533|ref|XP_003541107.2| PREDICTED: diacylglycerol kinase 5-like isoform X1 [Glycine max] 3.2e-140	GO:0004143, diacylglycerol kinase activity;GO:0005524, ATP binding;GO:0006952, defense response;GO:0007205, protein kinase C-activating G-protein coupled receptor signaling pathway	K00901-ko04072 Phospholipase D signaling pathway;ko04070 Phosphatidylinositol signaling system;ko00564 Glycerophospholipid metabolism;ko00561 Glycerolipid metabolism	16.983	14.705	16.7119	4.51393	4.28146	10.178	7.57272	5.07883	4.02998	4.06071	7.20661	6.15717	5.28408	3.17183	4.56684	18.1539	20.8643	21.0946
T_39451_c1_g4	gi|947092656|gb|KRH41241.1| hypothetical protein GLYMA_08G018000 [Glycine max] 5.8e-248	GO:0003824, catalytic activity;GO:0009058, biosynthetic process;GO:0009693, ethylene biosynthetic process;GO:0009835, fruit ripening;GO:0016847, 1-aminocyclopropane-1-carboxylate synthase activity;GO:0030170, pyridoxal phosphate binding	-	24.5427	59.2663	107.567	9.03241	15.7033	4.20371	104.074	46.9857	29.0279	49.569	83.1627	12.0998	28.9927	27.7004	48.4849	195.159	157.68	126.044
T_39455_c1_g2	gi|947112694|gb|KRH60996.1| hypothetical protein GLYMA_04G021000 [Glycine max] 3.9e-222	GO:0005622, intracellular;GO:0035556, intracellular signal transduction;GO:0047134, protein-disulfide reductase activity	-	21.0189	29.0564	44.8905	8.80332	3.19973	3.53288	6.9381	10.5247	2.46807	11.011	13.9879	26.677	6.17752	7.11222	4.76613	15.305	8.37914	11.106
T_39458_c4_g2	gi|947078603|gb|KRH27443.1| hypothetical protein GLYMA_12G235600 [Glycine max] 2.2e-06	-	-	634.045	267.69	196.692	87.3235	126.043	117.083	151.77	217.336	79.5592	118.493	108.652	102.639	121.673	96.6259	126.527	145.246	189.804	227.564
T_39459_c2_g1	gi|965660582|dbj|BAT77001.1| hypothetical protein VIGAN_01508000 [Vigna angularis var. angularis] 4.7e-217	GO:0004478, methionine adenosyltransferase activity;GO:0005524, ATP binding;GO:0005737, cytoplasm;GO:0006556, S-adenosylmethionine biosynthetic process;GO:0006730, one-carbon metabolic process;GO:0046872, metal ion binding	K00789-ko00270 Cysteine and methionine metabolism;ko01230 Biosynthesis of amino acids	314.645	439.689	437.203	594.655	454.574	416.35	492.383	566.591	710.168	686.077	855.704	654.92	725.897	889.608	978.194	749.047	574.115	490.581
T_39464_c0_g1	gi|571534665|ref|XP_006600576.1| PREDICTED: respiratory burst oxidase homolog protein F-like isoform X1 [Glycine max] 0.0e+00	GO:0002679, respiratory burst involved in defense response;GO:0004601, peroxidase activity;GO:0005509, calcium ion binding;GO:0005622, intracellular;GO:0005886, plasma membrane;GO:0007231, osmosensory signaling pathway;GO:0009723, response to ethylene;GO:0009738, abscisic acid-activated signaling pathway;GO:0009873, ethylene-activated signaling pathway;GO:0010119, regulation of stomatal movement;…	-	11.8629	10.872	7.39056	3.02557	3.67784	8.15099	5.34257	3.22765	5.74847	2.48004	5.82083	6.66085	6.76057	2.55999	3.38749	2.90658	3.89048	5.66827
T_39469_c1_g2	gi|734390515|gb|KHN26803.1| hypothetical protein glysoja_011395 [Glycine soja] 8.7e-57	GO:0003723, RNA binding;GO:0005681, spliceosomal complex;GO:0006397, mRNA processing;GO:0006886, intracellular protein transport;GO:0008380, RNA splicing;GO:0031083, BLOC-1 complex	K12627-ko03040 Spliceosome;ko03018 RNA degradation	29.1863	19.9981	15.9009	10.8585	16.6175	17.854	12.4277	13.4948	11.0752	9.68803	10.5486	8.11272	10.0155	9.57658	6.59891	10.5859	14.2807	17.4573
T_39475_c4_g1	gi|965607498|dbj|BAT93989.1| hypothetical protein VIGAN_08055100 [Vigna angularis var. angularis] 6.2e-113	GO:0004674, protein serine/threonine kinase activity;GO:0005524, ATP binding;GO:0005886, plasma membrane;GO:0006468, protein phosphorylation;GO:0009506, plasmodesma;GO:0016021, integral component of membrane;GO:0042742, defense response to bacterium	-	137.316	102.238	60.312	30.4719	42.888	48.0876	42.4714	41.4843	32.9011	47.7629	69.3227	46.8062	58.3421	58.6434	128.374	58.4782	142.862	119.474
T_39476_c2_g2	gi|734379713|gb|KHN22595.1| hypothetical protein glysoja_037745, partial [Glycine soja] 7.1e-189	-	-	2.7958	3.88307	6.90752	2.15572	3.41403	2.3412	10.524	4.87469	5.09599	5.47483	7.04397	2.85082	5.03463	4.18031	6.44248	9.19063	9.10894	9.23103
T_39485_c0_g2	gi|947046477|gb|KRG96106.1| hypothetical protein GLYMA_19G189600 [Glycine max] 4.8e-47	GO:0005840, ribosome;GO:0016021, integral component of membrane	K02896-ko03010 Ribosome	522.541	569.17	458.681	270.265	487.552	610.833	336.337	312.314	213.963	272.06	237.507	338.704	300.283	224.655	218.441	256.681	322.489	455.194
T_39485_c0_g5	gi|356523342|ref|XP_003530299.1| PREDICTED: factor of DNA methylation 1-like [Glycine max] 9.5e-295	GO:0003677, DNA binding;GO:0003723, RNA binding;GO:0003725, double-stranded RNA binding;GO:0004526, ribonuclease P activity;GO:0005655, nucleolar ribonuclease P complex;GO:0009506, plasmodesma;GO:0031047, gene silencing by RNA;GO:0043621, protein self-association;GO:0080188, RNA-directed DNA methylation;GO:0090502, RNA phosphodiester bond hydrolysis, endonucleolytic	-	28.9351	13.0491	9.19158	4.6151	3.39771	8.91173	5.15851	5.91696	4.46934	3.02678	5.71948	4.79617	3.84746	3.87238	5.52914	4.42495	5.00106	7.55174
T_39488_c3_g4	gi|351723433|ref|NP_001235487.1| uncharacterized protein LOC100527140 [Glycine max] 1.6e-19	-	-	30.2032	49.8526	56.292	23.6694	25.0534	13.5338	88.8998	61.5208	50.9424	80.0284	103.008	22.4752	47.6605	64.5248	61.358	232.184	147.456	140.166
T_39497_c0_g1	gi|955338700|ref|XP_014617011.1| PREDICTED: uncharacterized protein LOC100797189 isoform X1 [Glycine max] 6.6e-179	-	K08272-ko04152 AMPK signaling pathway;ko04150 mTOR signaling pathway	32.2372	16.7375	10.5275	4.72772	5.2246	7.00154	8.22519	9.77685	5.13426	4.59977	8.89934	4.73159	8.08212	6.70728	7.18634	10.831	10.2035	17.9984
T_39498_c1_g5	gi|351723017|ref|NP_001237008.1| uncharacterized protein LOC100306322 [Glycine max] 4.3e-60	GO:0000786, nucleosome;GO:0000790, nuclear chromatin;GO:0003677, DNA binding;GO:0005634, nucleus;GO:0005773, vacuole;GO:0006342, chromatin silencing;GO:0009266, response to temperature stimulus;GO:0042742, defense response to bacterium	-	7.34995	8.33989	6.50382	7.71392	7.66585	6.36396	10.6206	12.0935	5.51089	11.5826	8.55535	6.98367	10.2225	13.67	9.2761	19.903	12.4255	13.7967
T_39504_c2_g6	gi|947080696|gb|KRH29485.1| hypothetical protein GLYMA_11G119000 [Glycine max] 5.9e-73	-	-	510.716	147.435	150.485	41.6619	157.369	101.862	86.5178	88.4747	46.8091	37.7985	89.6096	75.2045	59.5841	35.6251	58.4386	33.7546	60.7493	78.0819
T_39510_c0_g1	gi|955308956|ref|XP_003519466.2| PREDICTED: structural maintenance of chromosomes protein 3-like [Glycine max] 0.0e+00	GO:0000775, chromosome, centromeric region;GO:0000785, chromatin;GO:0003682, chromatin binding;GO:0005524, ATP binding;GO:0005634, nucleus;GO:0005737, cytoplasm;GO:0005819, spindle;GO:0006281, DNA repair;GO:0007059, chromosome segregation;GO:0007062, sister chromatid cohesion;GO:0007064, mitotic sister chromatid cohesion;GO:0008278, cohesin complex;GO:0009506, plasmodesma;GO:0016363, nuclear matr…	K06669-ko04114 Oocyte meiosis;ko04111 Cell cycle - yeast;ko04113 Meiosis - yeast;ko04110 Cell cycle	26.9949	10.9343	4.84159	3.01399	2.19182	7.18163	4.59788	3.40039	3.56323	1.07639	2.11891	4.28388	4.18591	2.3339	3.27151	3.53831	6.0297	11.6042
T_39511_c0_g5	gi|571495794|ref|XP_006593379.1| PREDICTED: uncharacterized protein LOC100500384 isoform X1 [Glycine max] 5.4e-63	GO:0008270, zinc ion binding;GO:0009737, response to abscisic acid;GO:0010200, response to chitin	-	23.6001	27.1064	35.3464	35.8086	32.3899	26.9339	28.3649	25.0735	27.8585	40.005	21.5325	15.8176	31.3798	50.022	18.8452	72.8087	81.4048	77.6896
T_39512_c0_g4	gi|356568525|ref|XP_003552461.1| PREDICTED: phospholipase A(1) LCAT3 [Glycine max] 1.4e-111	GO:0005783, endoplasmic reticulum;GO:0006629, lipid metabolic process;GO:0008374, O-acyltransferase activity;GO:0008970, phosphatidylcholine 1-acylhydrolase activity;GO:0016042, lipid catabolic process;GO:0031090, organelle membrane;GO:0052739, phosphatidylserine 1-acylhydrolase activity;GO:0052740, 1-acyl-2-lysophosphatidylserine acylhydrolase activity	-	12.2339	15.1024	12.6748	4.47248	7.10186	8.39998	8.1657	8.35356	5.73189	4.5946	7.94668	4.80797	6.00679	4.52168	6.63714	4.89164	7.86455	11.5982
T_39513_c1_g3	gi|955384835|ref|XP_014626477.1| PREDICTED: phosphatidylinositol/phosphatidylcholine transfer protein SFH9-like isoform X1 [Glycine max] 4.7e-264	GO:0000139, Golgi membrane;GO:0005215, transporter activity;GO:0005886, plasma membrane;GO:0015031, protein transport	-	8.37324	4.69587	3.05285	2.30795	1.68924	3.39667	2.59047	1.94411	1.94267	2.89462	2.23332	2.01222	1.40074	2.46789	1.52654	1.88081	1.61253	5.48802
T_39514_c1_g2	gi|574584589|ref|NP_001276177.1| 7-ethoxycoumarin O-deethylase-like precursor [Glycine max] 2.7e-267	GO:0004497, monooxygenase activity;GO:0005506, iron ion binding;GO:0005789, endoplasmic reticulum membrane;GO:0016021, integral component of membrane;GO:0016099, monoterpenoid biosynthetic process;GO:0016705, oxidoreductase activity, acting on paired donors, with incorporation or reduction of molecular oxygen;GO:0016709, oxidoreductase activity, acting on paired donors, with incorporation or redu…	-	48.433	35.3805	74.6042	173.119	63.6794	66.819	193.352	167.896	134.906	198.027	184.621	65.1113	187.579	86.487	135.343	136.319	47.7795	114.448
T_39516_c1_g1	gi|955378102|ref|XP_014624888.1| PREDICTED: basic leucine zipper 1-like [Glycine max] 4.3e-57	GO:0003700, DNA binding transcription factor activity;GO:0004707, MAP kinase activity;GO:0005622, intracellular;GO:0043565, sequence-specific DNA binding;GO:0046982, protein heterodimerization activity	-	16.2757	16.1152	7.49254	22.1495	12.5526	14.1701	14.2592	21.7618	14.5563	21.4844	13.9785	32.3533	23.9026	45.3503	24.6597	14.6579	10.2559	10.5362
T_39517_c2_g1	gi|734416906|gb|KHN38623.1| hypothetical protein glysoja_008172 [Glycine soja] 1.2e-68	GO:0009269, response to desiccation	-	6.11935	6.82251	6.72271	12.3847	10.4693	5.85472	11.5757	13.0734	16.3183	13.4898	12.025	14.8016	15.9615	22.7187	20.0149	20.23	11.3582	11.7497
T_39518_c2_g3	gi|351720680|ref|NP_001235137.1| uncharacterized protein LOC100305676 [Glycine max] 9.0e-34	-	-	212.616	124.834	100.134	58.884	83.5781	76.9154	87.3367	51.5373	27.7266	65.9119	69.5672	74.5549	83.5861	43.8296	88.4323	107.733	69.3054	151.475
T_39528_c0_g1	gi|356534554|ref|XP_003535818.1| PREDICTED: syntaxin-121-like [Glycine max] 4.1e-47	GO:0000149, SNARE binding;GO:0005484, SNAP receptor activity;GO:0005802, trans-Golgi network;GO:0005886, plasma membrane;GO:0006612, protein targeting to membrane;GO:0006886, intracellular protein transport;GO:0006887, exocytosis;GO:0006906, vesicle fusion;GO:0006952, defense response;GO:0009504, cell plate;GO:0009506, plasmodesma;GO:0009620, response to fungus;GO:0009737, response to abscisic ac…	-	11.6221	13.838	19.9075	27.0825	17.456	12.4506	26.9612	28.669	35.3087	37.9421	42.4151	17.046	33.4857	73.7921	43.9894	81.4854	51.3927	41.212
T_39530_c0_g3	-	-	-	8.72137	8.28452	6.54441	0.327776	0.147607	2.03176	3.52537	2.08261	0.908062	0	1.95946	0.87812	1.79679	0.558313	1.12582	2.91467	4.34246	8.5266
T_39537_c4_g2	gi|593785907|ref|XP_007155994.1| hypothetical protein PHAVU_003G249800g [Phaseolus vulgaris] 3.8e-166	GO:0005509, calcium ion binding;GO:0009535, chloroplast thylakoid membrane;GO:0009654, photosystem II oxygen evolving complex;GO:0015979, photosynthesis;GO:0016021, integral component of membrane;GO:0019898, extrinsic component of membrane;GO:0042549, photosystem II stabilization	K02716-ko00195 Photosynthesis	2887.36	485.404	856.266	389.787	101.278	695.582	294.065	186.918	150.785	519.624	576.274	1180.04	1930.9	304.259	322.108	305.626	603.264	637.953
T_39541_c1_g1	gi|356535705|ref|XP_003536384.1| PREDICTED: uncharacterized protein LOC100788598 [Glycine max] 3.2e-220	-	-	18.0516	16.7855	9.12222	6.86016	6.94032	7.55705	9.00307	9.75705	5.99496	5.13892	5.65249	4.44109	4.28309	4.78312	6.24579	4.69487	5.54033	15.899
T_39547_c0_g1	gi|734370895|gb|KHN19505.1| hypothetical protein glysoja_027762 [Glycine soja] 6.3e-220	GO:0016021, integral component of membrane	-	26.5304	26.6444	23.4148	13.4555	11.4958	10.6207	21.3004	24.0797	10.2352	15.3374	23.9475	17.8696	14.1885	18.4694	24.6277	20.2514	18.565	20.6847
T_39548_c0_g1	gi|571456951|ref|XP_006580532.1| PREDICTED: uncharacterized protein LOC102670105 [Glycine max] 6.4e-62	-	-	20.1439	21.5314	25.536	1.21315	8.41136	2.95119	39.9192	19.4075	18.554	24.685	41.4839	10.8338	21.6906	19.889	25.9842	77.3992	61.8074	64.9941
T_39548_c0_g2	gi|356550086|ref|XP_003543421.1| PREDICTED: probable CCR4-associated factor 1 homolog 11 [Glycine max] 4.8e-156	GO:0000175, 3'-5'-exoribonuclease activity;GO:0000288, nuclear-transcribed mRNA catabolic process, deadenylation-dependent decay;GO:0000289, nuclear-transcribed mRNA poly(A) tail shortening;GO:0003676, nucleic acid binding;GO:0003723, RNA binding;GO:0004535, poly(A)-specific ribonuclease activity;GO:0005634, nucleus;GO:0005737, cytoplasm;GO:0006351, transcription, DNA-templated;GO:0006355, regula…	K12581-ko03018 RNA degradation	63.2366	138.729	223.161	19.3248	72.1037	29.4431	280.233	149.638	168.691	222.418	282.428	75.5367	160.672	162.282	228.563	613.719	487.392	361.488
T_39548_c1_g1	gi|955357132|ref|XP_006593975.2| PREDICTED: alpha-aminoadipic semialdehyde synthase-like isoform X1 [Glycine max] 0.0e+00	GO:0005737, cytoplasm;GO:0016021, integral component of membrane;GO:0016491, oxidoreductase activity;GO:0033512, L-lysine catabolic process to acetyl-CoA via saccharopine;GO:0047130, saccharopine dehydrogenase (NADP+, L-lysine-forming) activity;GO:0047131, saccharopine dehydrogenase (NAD+, L-glutamate-forming) activity	K14157-ko00310 Lysine degradation	119.975	104.461	106.591	380.159	409.301	274.775	241.701	390.991	255.471	398.216	166.766	93.2545	359.826	310.62	142.986	331.402	262.842	362.107
T_39554_c4_g3	gi|356542613|ref|XP_003539761.1| PREDICTED: uncharacterized protein LOC100812183 [Glycine max] 1.9e-53	-	-	12.1255	16.6537	30.4772	1.47255	4.82003	1.59274	18.6504	8.33299	16.7368	10.0973	15.9856	6.90725	14.7232	14.7505	19.6861	23.3527	23.6546	13.3046
T_39556_c3_g1	gi|356510463|ref|XP_003523957.1| PREDICTED: trihelix transcription factor ASIL2-like [Glycine max] 2.0e-114	GO:0003677, DNA binding;GO:0003700, DNA binding transcription factor activity;GO:0005634, nucleus;GO:0006351, transcription, DNA-templated;GO:0006355, regulation of transcription, DNA-templated;GO:0009793, embryo development ending in seed dormancy;GO:0010431, seed maturation	-	26.9434	20.8216	15.2441	4.49043	11.2429	11.634	11.6776	10.7273	4.72282	8.59623	12.3121	10.9152	10.0595	6.90002	10.0373	7.52282	17.7889	13.358
T_39556_c3_g4	gi|356546348|ref|XP_003541588.1| PREDICTED: trihelix transcription factor ASIL1-like [Glycine max] 7.3e-118	GO:0003677, DNA binding;GO:0003700, DNA binding transcription factor activity;GO:0005634, nucleus;GO:0006351, transcription, DNA-templated;GO:0006355, regulation of transcription, DNA-templated;GO:0009793, embryo development ending in seed dormancy;GO:0010431, seed maturation	-	51.6321	17.1564	11.4209	4.95664	4.09965	10.4861	7.47216	11.1793	5.96815	4.27829	6.59588	9.50223	7.58493	3.74479	5.53375	6.27143	11.194	13.9203
T_39558_c0_g1	gi|1012333091|gb|KYP44497.1| IST1 isogeny [Cajanus cajan] 5.3e-81	GO:0005635, nuclear envelope;GO:0005815, microtubule organizing center;GO:0007049, cell cycle;GO:0015031, protein transport;GO:0030496, midbody;GO:0051301, cell division	K19476-ko04144 Endocytosis	20.8481	12.2145	9.38064	6.67933	6.14224	8.22168	7.31429	7.21377	5.51521	4.57584	7.75352	6.01653	5.11724	5.86219	3.95841	6.11943	7.89249	13.2359
T_39560_c1_g1	gi|326518040|dbj|BAK07272.1| predicted protein [Hordeum vulgare subsp. vulgare] 7.7e-44	GO:0000028, ribosomal small subunit assembly;GO:0003735, structural constituent of ribosome;GO:0005840, ribosome;GO:0006412, translation;GO:0022627, cytosolic small ribosomal subunit	K02962-ko03010 Ribosome	5.64156	2.70896	15.015	5.48709	0	0	2.32434	0.994555	0	0.864654	3.53609	0.373124	0.857397	0	4.72063	0.715506	0.931111	0.27485
T_39563_c0_g1	gi|356574521|ref|XP_003555395.1| PREDICTED: probable WRKY transcription factor 27 [Glycine max] 6.8e-45	GO:0003700, DNA binding transcription factor activity;GO:0005634, nucleus;GO:0006351, transcription, DNA-templated;GO:0007263, nitric oxide mediated signal transduction;GO:0009739, response to gibberellin;GO:0042742, defense response to bacterium;GO:0043565, sequence-specific DNA binding;GO:0044212, transcription regulatory region DNA binding;GO:0045892, negative regulation of transcription, DNA-…	-	1.93686	3.807	7.4245	3.4541	2.30977	2.05757	6.29189	3.47924	8.91509	5.24999	4.88689	1.88508	6.66567	8.32342	5.39966	12.241	15.8156	14.9091
T_39566_c1_g1	gi|593780797|ref|XP_007153439.1| hypothetical protein PHAVU_003G035300g [Phaseolus vulgaris] 1.1e-25	-	-	17.6434	16.7135	14.5873	4.65264	6.77182	6.9807	11.9748	11.5214	6.16822	8.75205	6.68099	12.2127	9.7419	10.9203	10.0968	10.2998	19.4637	24.4342
T_39567_c0_g2	gi|356497998|ref|XP_003517842.1| PREDICTED: uncharacterized protein LOC100777177 [Glycine max] 5.9e-11	-	-	20.6988	20.6901	11.4548	9.48438	8.08106	9.43345	6.17895	7.57108	7.5963	4.10338	14.0483	9.11866	10.055	5.50343	10.4099	5.70149	17.2331	14.2596
T_39571_c0_g1	gi|734427550|gb|KHN44283.1| hypothetical protein glysoja_024503 [Glycine soja] 2.0e-19	-	-	57.2172	25.122	11.1793	5.49436	7.35233	14.2436	5.33817	3.54787	9.47356	1.62104	9.61264	11.4616	17.6603	3.69078	5.81862	5.41846	12.6804	28.0141
T_39576_c2_g1	gi|920694260|gb|KOM37485.1| hypothetical protein LR48_Vigan03g086700 [Vigna angularis] 3.7e-86	GO:0005576, extracellular region;GO:0016042, lipid catabolic process;GO:0016787, hydrolase activity	-	88.9961	75.7284	63.2554	15.1909	86.2693	68.8105	79.6051	29.3908	149.98	25.1388	315.354	66.0801	235.417	148.103	580.641	41.4884	288.902	335.46
T_39576_c2_g4	gi|593268065|ref|XP_007136210.1| hypothetical protein PHAVU_009G027600g [Phaseolus vulgaris] 7.9e-47	GO:0005737, cytoplasm;GO:0016020, membrane;GO:0030001, metal ion transport;GO:0046872, metal ion binding;GO:0046914, transition metal ion binding;GO:0046916, cellular transition metal ion homeostasis	-	112.778	79.9513	70.5099	18.3063	25.1197	20.7667	20.6144	25.4175	18.374	20.5254	34.3545	35.3022	21.1213	25.6512	15.2343	34.3004	40.4737	66.3791
T_39577_c0_g6	gi|734368369|gb|KHN18783.1| Rho GTPase-activating protein gacA [Glycine soja] 1.1e-177	GO:0005096, GTPase activator activity;GO:0007165, signal transduction;GO:0034059, response to anoxia	-	40.6024	30.7575	29.8652	15.244	20.9238	22.4381	21.9592	24.015	11.325	15.7747	16.7113	17.1198	17.7499	13.2727	15.7803	16.9708	18.8522	21.6132
T_39580_c1_g1	-	-	-	1.6444	3.56805	9.80817	0.755808	0.314811	0	0.152312	1.62811	0	0.333846	0.930458	2.15828	0	0	0	0	0	0
T_39583_c3_g3	gi|955331098|ref|XP_003530245.2| PREDICTED: Werner Syndrome-like exonuclease [Glycine max] 1.2e-68	GO:0003676, nucleic acid binding;GO:0003677, DNA binding;GO:0005634, nucleus;GO:0005737, cytoplasm;GO:0008408, 3'-5' exonuclease activity;GO:0046872, metal ion binding	-	89.1662	139.243	182.237	113.893	134.037	95.0499	231.314	188.785	246.032	270.252	260.796	195.833	211.966	255.434	242.49	424.338	388.474	240.908
T_39590_c3_g1	gi|356508758|ref|XP_003523121.1| PREDICTED: probable pectate lyase 5 [Glycine max] 4.1e-133	GO:0030570, pectate lyase activity;GO:0045490, pectin catabolic process;GO:0046872, metal ion binding	-	5.76866	13.8598	14.0658	11.1936	9.35423	8.33258	19.2174	20.7194	12.8773	19.9268	31.566	19.2066	11.0428	31.2415	28.4964	19.1056	8.9766	7.09256
T_39590_c3_g3	gi|947108850|gb|KRH57176.1| hypothetical protein GLYMA_05G044000 [Glycine max] 1.9e-101	GO:0030570, pectate lyase activity;GO:0045490, pectin catabolic process;GO:0046872, metal ion binding	-	32.1873	36.8859	29.3845	59.8028	88.0489	66.2247	47.0343	61.2595	97.6729	77.5479	87.3526	147.042	58.9299	96.1581	92.7426	14.2026	24.6485	12.0273
T_39591_c2_g1	gi|951049131|ref|XP_014519882.1| PREDICTED: ethylene-responsive transcription factor 6-like [Vigna radiata var. radiata] 5.1e-97	GO:0000302, response to reactive oxygen species;GO:0001944, vasculature development;GO:0003677, DNA binding;GO:0003700, DNA binding transcription factor activity;GO:0005634, nucleus;GO:0006351, transcription, DNA-templated;GO:0006952, defense response;GO:0009644, response to high light intensity;GO:0009873, ethylene-activated signaling pathway;GO:0010200, response to chitin;GO:0051301, cell divis…	-	82.6047	109.017	96.4712	20.4069	65.011	25.9807	125.903	121.081	95.6616	120.544	134.709	59.8843	114.852	106.985	160.384	217.289	163.365	203.841
T_39591_c3_g3	gi|356549699|ref|XP_003543229.1| PREDICTED: ethylene-responsive transcription factor 4 [Glycine max] 3.7e-35	GO:0003677, DNA binding;GO:0003700, DNA binding transcription factor activity;GO:0005634, nucleus;GO:0006351, transcription, DNA-templated;GO:0009873, ethylene-activated signaling pathway;GO:0009908, flower development;GO:0010102, lateral root morphogenesis;GO:0010432, bract development;GO:0010451, floral meristem growth;GO:0010582, floral meristem determinacy;GO:0044212, transcription regulatory…	-	59.827	94.553	90.3678	38.6892	64.2114	34.3923	159.176	138.845	134.237	175.455	209.447	104.657	140.207	157.297	195.859	239.631	167.334	205.61
T_39595_c1_g1	gi|734438106|gb|KHN48920.1| NAC domain-containing protein 21/22 [Glycine soja] 2.8e-136	GO:0003677, DNA binding;GO:0003700, DNA binding transcription factor activity;GO:0005634, nucleus;GO:0006351, transcription, DNA-templated;GO:0006355, regulation of transcription, DNA-templated;GO:0010014, meristem initiation;GO:0010199, organ boundary specification between lateral organs and the meristem	-	7.15675	6.32245	6.85247	1.06977	5.0824	4.84512	2.5757	2.52111	1.66514	2.03594	3.09711	4.69164	3.87425	2.58469	4.41533	1.88259	4.23862	3.38574
T_39596_c0_g1	gi|356526435|ref|XP_003531823.1| PREDICTED: cytochrome P450 72A15 [Glycine max] 1.8e-215	GO:0003997, acyl-CoA oxidase activity;GO:0004497, monooxygenase activity;GO:0005506, iron ion binding;GO:0016021, integral component of membrane;GO:0016705, oxidoreductase activity, acting on paired donors, with incorporation or reduction of molecular oxygen;GO:0020037, heme binding	-	140.872	131.318	117.497	116.996	131.469	130.827	101.708	83.4444	57.0214	62.4059	82.6473	70.5008	54.4221	36.3602	62.7839	53.0292	81.134	123.856
T_39598_c0_g6	gi|356538775|ref|XP_003537876.1| PREDICTED: BTB/POZ domain-containing protein At3g05675-like [Glycine max] 3.0e-171	-	-	14.6026	17.3038	12.281	23.835	18.0841	15.546	20.5869	27.4814	32.9533	23.8872	26.9568	32.6385	31.4368	40.1076	39.675	27.8401	17.0383	16.187
T_39604_c2_g3	gi|356528396|ref|XP_003532789.1| PREDICTED: transcription factor EGL1-like [Glycine max] 0.0e+00	GO:0001708, cell fate specification;GO:0003677, DNA binding;GO:0003700, DNA binding transcription factor activity;GO:0005634, nucleus;GO:0006351, transcription, DNA-templated;GO:0007275, multicellular organism development;GO:0008152, metabolic process;GO:0009957, epidermal cell fate specification;GO:0010091, trichome branching;GO:0016597, amino acid binding	-	8.55544	5.6202	3.14409	3.39256	2.09353	4.24575	3.34094	3.25429	2.55669	1.71201	2.61347	2.07949	2.37763	1.72778	1.37609	1.85604	2.72381	3.55041
T_39617_c3_g3	gi|356500485|ref|XP_003519062.1| PREDICTED: chaperone protein dnaJ 6-like [Glycine max] 4.2e-78	GO:0005634, nucleus	-	13.9931	8.19123	6.29004	1.64551	5.66777	8.07066	4.90091	5.4566	4.25959	2.75652	4.14379	5.24056	3.44607	2.06266	3.56025	1.97981	3.52437	5.54264
T_39618_c1_g2	gi|571455863|ref|XP_006580211.1| PREDICTED: uncharacterized protein LOC102662390 [Glycine max] 9.2e-52	GO:0016021, integral component of membrane	-	2.3645	2.89059	7.9739	4.90038	6.29688	3.81015	6.59745	3.26336	7.0006	7.93061	12.1839	11.6108	7.17904	10.4337	12.803	7.38366	4.79162	5.03501
T_39624_c1_g4	gi|356506124|ref|XP_003521837.1| PREDICTED: pumilio homolog 23 [Glycine max] 3.3e-191	GO:0003723, RNA binding;GO:0005730, nucleolus;GO:0006417, regulation of translation;GO:0009744, response to sucrose;GO:0009749, response to glucose;GO:0010252, auxin homeostasis	-	15.5379	9.51522	7.45422	4.72652	4.24803	7.15505	7.22314	6.36518	4.66262	3.94057	5.98186	3.65512	3.74897	4.26611	4.46614	3.8039	3.82173	4.57726
T_39626_c0_g2	gi|571568899|ref|XP_006606301.1| PREDICTED: uncharacterized protein LOC100791460 [Glycine max] 7.0e-219	-	-	11.2022	6.72897	5.93467	1.63254	4.78367	4.5697	4.19405	4.31804	2.39009	3.20303	2.73928	2.39548	2.93248	1.75242	2.58751	3.31621	2.61362	3.95612
T_39629_c2_g7	gi|965604765|dbj|BAT91941.1| hypothetical protein VIGAN_07058500 [Vigna angularis var. angularis] 6.5e-49	GO:0003756, protein disulfide isomerase activity;GO:0005623, cell;GO:0005783, endoplasmic reticulum;GO:0006457, protein folding;GO:0034976, response to endoplasmic reticulum stress;GO:0045454, cell redox homeostasis	K13984-ko04141 Protein processing in endoplasmic reticulum	22.1033	22.2317	18.523	8.54162	14.7331	16.2599	11.4656	15.4454	9.45372	9.08781	13.8723	9.83043	11.2905	6.68236	8.83212	12.283	14.2916	19.761
T_39629_c2_g9	gi|734313066|gb|KHN01166.1| Homeobox-leucine zipper protein HAT5 [Glycine soja] 3.4e-25	GO:0003700, DNA binding transcription factor activity;GO:0005634, nucleus;GO:0043565, sequence-specific DNA binding	-	38.1411	35.0144	41.1601	25.8975	14.7632	14.4551	21.8164	27.4059	19.0111	22.6449	35.7919	21.3686	12.5739	17.756	19.4945	25.6533	23.8093	17.5426
T_39638_c0_g1	gi|947109027|gb|KRH57353.1| hypothetical protein GLYMA_05G056300 [Glycine max] 6.1e-94	GO:0004575, sucrose alpha-glucosidase activity;GO:0005773, vacuole;GO:0005975, carbohydrate metabolic process;GO:0005985, sucrose metabolic process;GO:0016021, integral component of membrane	-	281.35	294.578	400.216	12.25	72.6565	82.8862	36.0786	15.508	72.5254	29.6351	177.769	220.448	101.088	38.8607	30.6814	23.2792	144.571	94.7919
T_39638_c0_g5	gi|734424481|gb|KHN42709.1| Acid beta-fructofuranosidase [Glycine soja] 5.3e-46	GO:0004575, sucrose alpha-glucosidase activity;GO:0005773, vacuole;GO:0005975, carbohydrate metabolic process;GO:0005985, sucrose metabolic process;GO:0016021, integral component of membrane	-	327.934	466.552	376.818	39.7622	182.191	169.557	63.1784	39.8563	136.617	109.149	423.596	318.313	190.864	226.625	90.4764	64.6406	489.188	331.555
T_39639_c0_g2	gi|571457959|ref|XP_006580968.1| PREDICTED: uncharacterized protein LOC100527571 isoform X1 [Glycine max] 7.9e-87	-	-	1867.07	549.992	311.82	63.8562	99.9827	182.187	129.916	161.788	86.6787	44.6913	176.037	86.6328	83.9024	85.804	109.703	58.9058	67.0872	211.426
T_39652_c0_g1	gi|356567636|ref|XP_003552023.1| PREDICTED: pantothenate kinase 1-like [Glycine max] 7.6e-142	GO:0004594, pantothenate kinase activity;GO:0005524, ATP binding;GO:0015937, coenzyme A biosynthetic process	K09680-ko00770 Pantothenate and CoA biosynthesis	9.73781	5.85128	3.98048	1.62075	1.85983	2.80281	4.35619	3.46995	1.66684	1.80178	3.74555	3.03683	3.10363	2.15523	3.47543	3.46491	3.81191	7.52789
T_39653_c1_g5	gi|950989165|ref|XP_014504106.1| PREDICTED: indole-3-pyruvate monooxygenase YUCCA6-like [Vigna radiata var. radiata] 4.0e-176	GO:0004497, monooxygenase activity;GO:0004499, N,N-dimethylaniline monooxygenase activity;GO:0005737, cytoplasm;GO:0009851, auxin biosynthetic process;GO:0050660, flavin adenine dinucleotide binding;GO:0050661, NADP binding;GO:0055114, oxidation-reduction process;GO:0103075, indole-3-pyruvate monooxygenase activity	K11816-ko00380 Tryptophan metabolism	12.6795	9.69246	7.64336	24.4221	22.6226	21.2652	32.715	41.7707	18.681	27.566	19.1366	16.3537	18.6194	20.4284	27.712	5.76157	5.30748	3.4907
T_39657_c1_g1	gi|356549888|ref|XP_003543322.1| PREDICTED: uncharacterized protein LOC100820571 [Glycine max] 1.6e-06	GO:0016021, integral component of membrane	-	23.5924	62.2469	105.362	5.08746	22.3452	16.9079	90.1056	63.4776	59.3638	66.5587	84.3137	28.6115	58.4753	65.8397	52.6096	154.278	115.608	231.68
T_39657_c3_g2	-	-	-	24.5705	18.8618	8.3491	21.5786	15.4598	18.3078	28.6818	28.8592	24.0259	30.6588	10.4301	9.67934	48.8052	50.8083	11.747	20.4037	34.1934	56.9817
T_39657_c3_g4	-	-	-	3.43179	4.33912	5.33959	11.1792	3.75987	2.23194	4.72408	4.07447	14.3478	17.1289	1.10662	0.997333	9.32666	38.7892	5.13578	31.6643	12.3012	16.6588
T_39658_c0_g1	gi|356515816|ref|XP_003526594.1| PREDICTED: sulfate transporter 1.3-like [Glycine max] 2.5e-66	GO:0005887, integral component of plasma membrane;GO:0008271, secondary active sulfate transmembrane transporter activity;GO:0015116, sulfate transmembrane transporter activity;GO:0015293, symporter activity	-	1.66992	1.15431	1.5898	6.83979	3.10629	1.70782	5.74972	11.5102	3.20743	9.82037	3.61933	1.22268	1.80481	3.59498	0.446179	3.2955	5.12877	1.76631
T_39658_c3_g3	gi|356513975|ref|XP_003525683.1| PREDICTED: probable galacturonosyltransferase 3 [Glycine max] 2.2e-239	GO:0000139, Golgi membrane;GO:0005768, endosome;GO:0005774, vacuolar membrane;GO:0005794, Golgi apparatus;GO:0005802, trans-Golgi network;GO:0016021, integral component of membrane;GO:0045489, pectin biosynthetic process;GO:0047262, polygalacturonate 4-alpha-galacturonosyltransferase activity;GO:0071555, cell wall organization	K13648-ko00520 Amino sugar and nucleotide sugar metabolism;ko00500 Starch and sucrose metabolism	12.6198	6.97488	5.36681	3.72382	2.83009	5.79999	4.78856	4.18341	2.64308	1.92224	3.34146	2.86198	2.71613	2.17499	3.39028	2.74341	3.76446	6.2216
T_39662_c1_g1	gi|351726078|ref|NP_001238138.1| 51 kDa seed maturation protein precursor [Glycine max] 2.0e-108	-	-	4.34021	9.53809	10.4096	0.23023	0	0.0623156	0	0	0	0.17421	2.57116	5.40483	0	0.0422818	0.127881	0.19137	0.512255	1.04081
T_39662_c2_g1	gi|571471925|ref|XP_006585445.1| PREDICTED: metacaspase-3-like [Glycine max] 1.1e-135	GO:0004197, cysteine-type endopeptidase activity;GO:0006952, defense response;GO:0043068, positive regulation of programmed cell death	-	13.6715	9.88852	7.15858	2.70879	3.36544	4.8847	3.563	3.35814	3.12455	1.89001	2.64206	3.24084	3.17337	0.964765	3.52983	3.2144	2.20154	2.94831
T_39662_c3_g2	gi|734329744|gb|KHN06399.1| Protein SCAR1 [Glycine soja] 0.0e+00	GO:0003785, actin monomer binding;GO:0005856, cytoskeleton;GO:0016020, membrane;GO:0030036, actin cytoskeleton organization;GO:0031209, SCAR complex;GO:0043229, intracellular organelle;GO:0051127, positive regulation of actin nucleation;GO:0071944, cell periphery	-	10.097	4.99953	5.47672	1.99971	1.87456	5.73257	3.18356	3.25806	2.40943	1.89526	2.5461	2.04344	2.10089	2.6305	2.9853	2.98369	2.90773	7.05897
T_39664_c0_g2	gi|255635268|gb|ACU17988.1| unknown [Glycine max] 2.9e-77	GO:0003735, structural constituent of ribosome;GO:0005739, mitochondrion;GO:0005743, mitochondrial inner membrane;GO:0006412, translation;GO:0009507, chloroplast;GO:0009536, plastid;GO:0009706, chloroplast inner membrane;GO:0009941, chloroplast envelope;GO:0016021, integral component of membrane;GO:0055085, transmembrane transport	-	6.88411	11.7647	16.289	9.11191	13.2905	11.2416	18.7906	11.7052	16.3662	15.3138	13.7076	12.8888	12.7975	13.7086	12.9901	31.9849	22.1723	16.1862
T_39664_c0_g3	gi|950963683|ref|XP_014498395.1| PREDICTED: adenine nucleotide transporter BT1, chloroplastic/mitochondrial-like [Vigna radiata var. radiata] 7.8e-71	GO:0003735, structural constituent of ribosome;GO:0005739, mitochondrion;GO:0005743, mitochondrial inner membrane;GO:0006412, translation;GO:0009507, chloroplast;GO:0009536, plastid;GO:0009706, chloroplast inner membrane;GO:0009941, chloroplast envelope;GO:0016021, integral component of membrane;GO:0055085, transmembrane transport	-	32.0706	27.8008	30.1255	14.7338	25.7327	23.341	23.5641	25.5432	12.8764	15.8534	17.489	18.5263	16.8681	10.4047	13.9005	12.7877	19.3328	21.2646
T_39669_c0_g2	gi|734419827|gb|KHN40333.1| 1-aminocyclopropane-1-carboxylate oxidase 1 [Glycine soja] 5.7e-151	GO:0006952, defense response;GO:0009693, ethylene biosynthetic process;GO:0009815, 1-aminocyclopropane-1-carboxylate oxidase activity;GO:0031418, L-ascorbic acid binding;GO:0046872, metal ion binding;GO:0051365, cellular response to potassium ion starvation;GO:0071281, cellular response to iron ion;GO:0071398, cellular response to fatty acid;GO:0071732, cellular response to nitric oxide	K05933-ko00270 Cysteine and methionine metabolism	0.646729	0.662095	1.49557	17.1395	15.429	12.2135	3.16303	4.19711	4.06657	13.7827	0.492359	0.295838	7.03111	5.08076	1.73541	6.90106	3.97589	3.57979
T_39669_c0_g4	gi|734310466|gb|KHM99846.1| 1-aminocyclopropane-1-carboxylate oxidase 1 [Glycine soja] 2.1e-169	GO:0006952, defense response;GO:0009693, ethylene biosynthetic process;GO:0009815, 1-aminocyclopropane-1-carboxylate oxidase activity;GO:0031418, L-ascorbic acid binding;GO:0046872, metal ion binding;GO:0051365, cellular response to potassium ion starvation;GO:0071281, cellular response to iron ion;GO:0071398, cellular response to fatty acid;GO:0071732, cellular response to nitric oxide	K05933-ko00270 Cysteine and methionine metabolism	1.75084	2.9586	7.90563	14.3749	20.8026	13.4905	4.46758	6.21097	15.498	53.5839	2.5674	5.5281	36.8789	37.2759	1.55206	48.4114	19.4362	20.2107
T_39670_c1_g1	gi|955384053|ref|XP_014626314.1| PREDICTED: uncharacterized protein LOC100794042 isoform X3 [Glycine max] 3.4e-209	GO:0004364, glutathione transferase activity;GO:0005737, cytoplasm;GO:0006749, glutathione metabolic process;GO:0009407, toxin catabolic process;GO:0016021, integral component of membrane	-	236.452	226.041	188.769	353.524	294.059	262.578	264.151	321.502	162.857	397.808	231.446	134.546	386.373	378.474	219.41	460.259	395.327	543.715
T_39672_c0_g2	gi|1012250873|ref|XP_015943562.1| PREDICTED: glycine-rich cell wall structural protein 2-like [Arachis duranensis] 5.9e-17	-	-	112.718	85.1839	88.6291	74.0623	68.9778	51.4842	53.0574	57.0287	20.9633	44.0792	47.0812	42.1359	34.0274	34.4116	43.7842	55.5376	42.5386	68.485
T_39672_c2_g4	gi|947063959|gb|KRH13220.1| hypothetical protein GLYMA_15G223900 [Glycine max] 1.1e-186	GO:0003959, NADPH dehydrogenase activity;GO:0005622, intracellular;GO:0010181, FMN binding;GO:0031408, oxylipin biosynthetic process;GO:0055114, oxidation-reduction process	K05894-ko00592 alpha-Linolenic acid metabolism	1.04601	0.0707245	0.121013	21.0861	14.284	11.3533	3.99886	11.2569	1.11856	23.2776	0.74467	1.00686	10.1321	18.0179	1.09145	21.08	13.2441	7.92484
T_39676_c1_g2	gi|947055023|gb|KRH04476.1| hypothetical protein GLYMA_17G163900 [Glycine max] 6.5e-80	GO:0004656, procollagen-proline 4-dioxygenase activity;GO:0005506, iron ion binding;GO:0005789, endoplasmic reticulum membrane;GO:0005794, Golgi apparatus;GO:0016021, integral component of membrane;GO:0016705, oxidoreductase activity, acting on paired donors, with incorporation or reduction of molecular oxygen;GO:0031418, L-ascorbic acid binding	-	31.6409	17.1923	15.2722	9.0034	8.95668	13.2717	8.3365	11.0214	8.56837	7.26618	8.18497	7.35489	9.29364	9.50355	7.46064	7.39538	11.1895	20.3385
T_39679_c2_g2	gi|356562928|ref|XP_003549720.1| PREDICTED: prostatic spermine-binding protein-like [Glycine max] 9.8e-07	-	-	78.5241	62.6111	51.3454	18.1617	35.5131	63.3203	25.0726	23.3427	18.2106	16.2814	19.5807	27.5076	24.0647	17.3731	15.5567	17.6009	38.237	40.0894
T_39686_c0_g1	gi|571489966|ref|XP_006591354.1| PREDICTED: protein HESO1-like [Glycine max] 1.6e-111	GO:0000932, P-body;GO:0004652, polynucleotide adenylyltransferase activity;GO:0005634, nucleus;GO:0005737, cytoplasm;GO:0016779, nucleotidyltransferase activity;GO:0050265, RNA uridylyltransferase activity;GO:0060964, regulation of gene silencing by miRNA;GO:0071076, RNA 3' uridylation	-	17.1958	11.1507	9.26309	4.45454	6.10923	9.26764	7.75487	7.60473	3.78285	5.3559	5.81358	4.21381	4.8432	3.23517	4.94018	5.21652	8.23526	9.41691
T_39687_c3_g1	gi|947116415|gb|KRH64717.1| hypothetical protein GLYMA_04G252000 [Glycine max] 3.6e-136	GO:0005783, endoplasmic reticulum;GO:0005789, endoplasmic reticulum membrane;GO:0005886, plasma membrane;GO:0005887, integral component of plasma membrane;GO:0016021, integral component of membrane;GO:1903424, fluoride transmembrane transport;GO:1903425, fluoride transmembrane transporter activity	-	3.04836	2.84436	1.67241	2.7877	3.4128	3.363	4.23755	3.44752	4.51268	4.17813	6.237	3.78787	5.21747	5.04272	6.82508	3.96975	3.1461	5.4782
T_39688_c0_g1	gi|955356112|ref|XP_014620732.1| PREDICTED: putative wall-associated receptor kinase-like 16 [Glycine max] 3.8e-53	GO:0004674, protein serine/threonine kinase activity;GO:0005509, calcium ion binding;GO:0005524, ATP binding;GO:0005886, plasma membrane;GO:0007166, cell surface receptor signaling pathway;GO:0009826, unidimensional cell growth;GO:0016021, integral component of membrane;GO:0030247, polysaccharide binding;GO:0048527, lateral root development	-	32.0399	11.6917	11.7531	2.73674	6.91707	2.05518	13.9981	5.83199	2.39259	4.84821	2.85475	3.07961	1.86251	0.637993	3.69314	13.4707	12.465	18.5023
T_39688_c0_g3	gi|955356112|ref|XP_014620732.1| PREDICTED: putative wall-associated receptor kinase-like 16 [Glycine max] 7.7e-92	GO:0004674, protein serine/threonine kinase activity;GO:0005509, calcium ion binding;GO:0005524, ATP binding;GO:0005886, plasma membrane;GO:0007166, cell surface receptor signaling pathway;GO:0016021, integral component of membrane;GO:0030247, polysaccharide binding	-	79.9751	29.0178	33.2589	21.6942	15.5015	20.6691	24.7803	34.5757	8.01978	12.6292	19.1442	15.1361	11.1854	14.4531	17.6726	27.6506	26.9439	31.4944
T_39690_c0_g2	gi|356524565|ref|XP_003530899.1| PREDICTED: dynamin-related protein 1C-like [Glycine max] 0.0e+00	GO:0000266, mitochondrial fission;GO:0003924, GTPase activity;GO:0005525, GTP binding;GO:0005737, cytoplasm;GO:0005874, microtubule;GO:0005886, plasma membrane;GO:0005938, cell cortex;GO:0007005, mitochondrion organization;GO:0007049, cell cycle;GO:0009504, cell plate;GO:0009506, plasmodesma;GO:0009524, phragmoplast;GO:0010152, pollen maturation;GO:0016020, membrane;GO:0051301, cell division	-	28.9971	25.8252	21.1179	10.9234	14.9681	30.9994	12.6994	11.3629	12.7366	9.73023	10.8612	13.4261	15.6771	10.5554	9.97531	6.21705	11.4848	16.878
T_39694_c1_g2	gi|356496344|ref|XP_003517028.1| PREDICTED: pectinesterase 2-like [Glycine max] 1.4e-189	GO:0004857, enzyme inhibitor activity;GO:0005576, extracellular region;GO:0005618, cell wall;GO:0009617, response to bacterium;GO:0009620, response to fungus;GO:0016020, membrane;GO:0030599, pectinesterase activity;GO:0042545, cell wall modification;GO:0045330, aspartyl esterase activity;GO:0045490, pectin catabolic process;GO:0046910, pectinesterase inhibitor activity;GO:0050829, defense respons…	K01051-ko00500 Starch and sucrose metabolism;ko00040 Pentose and glucuronate interconversions	13.231	19.303	21.419	60.6196	82.1594	49.8597	23.8981	20.1843	135.907	38.198	42.5953	40.5959	146.066	34.4416	54.1592	26.6928	78.7265	41.7725
T_39694_c1_g3	gi|734435812|gb|KHN47891.1| Pectinesterase 2 [Glycine soja] 1.7e-72	GO:0004857, enzyme inhibitor activity;GO:0005576, extracellular region;GO:0005618, cell wall;GO:0030599, pectinesterase activity;GO:0042545, cell wall modification;GO:0045330, aspartyl esterase activity;GO:0045490, pectin catabolic process	-	34.7058	34.2196	27.6036	61.0177	78.7065	78.9224	28.1476	21.8039	86.6936	25.5443	34.1808	42.8674	153.791	55.0062	54.2706	37.5771	91.4544	118.509
T_39694_c2_g5	gi|955326411|ref|XP_003527536.3| PREDICTED: probable pectinesterase/pectinesterase inhibitor 47 [Glycine max] 3.3e-283	GO:0004857, enzyme inhibitor activity;GO:0005576, extracellular region;GO:0005618, cell wall;GO:0030599, pectinesterase activity;GO:0042545, cell wall modification;GO:0045330, aspartyl esterase activity;GO:0045490, pectin catabolic process;GO:0046910, pectinesterase inhibitor activity;GO:0071944, cell periphery	K01051-ko00500 Starch and sucrose metabolism;ko00040 Pentose and glucuronate interconversions	0.813206	0.99503	1.55956	7.49851	4.29772	4.66831	2.69166	2.75573	6.09519	2.38701	1.82915	0.570469	1.95711	1.24306	3.26505	0.735931	2.88809	1.77075
T_39697_c2_g1	gi|356570914|ref|XP_003553628.1| PREDICTED: uncharacterized protein LOC100794951 [Glycine max] 1.3e-77	-	-	4.58895	4.19276	2.50127	3.25605	4.97123	5.34413	4.63063	4.89076	11.9049	5.67183	12.7844	9.78715	14.474	15.2436	32.3797	6.41306	3.86484	8.18477
T_39698_c0_g3	gi|593699362|ref|XP_007150146.1| hypothetical protein PHAVU_005G130700g [Phaseolus vulgaris] 3.6e-11	-	-	5.00184	6.35471	5.99008	13.3212	13.1834	13.0201	15.0893	12.8307	13.3691	12.6452	10.1256	11.7702	13.8963	13.2147	15.8452	6.67828	6.63037	12.7295
T_39698_c1_g13	gi|1012366670|gb|KYP77851.1| hypothetical protein KK1_050205, partial [Cajanus cajan] 1.5e-12	-	-	5.25411	1.37731	2.6086	7.3848	3.23596	1.23977	5.07412	5.88146	5.74504	18.3533	1.70737	0.770619	9.42607	17.0982	2.87789	52.9881	16.165	22.6109
T_39699_c4_g2	gi|351726812|ref|NP_001237651.1| uncharacterized protein LOC100527291 [Glycine max] 9.9e-74	GO:0016021, integral component of membrane	-	33.0884	24.7559	19.3701	7.91019	8.81533	15.238	7.98105	5.50805	8.22346	7.03687	6.32358	11.4371	13.4052	8.24677	11.3727	8.16367	9.9426	20.3515
T_39699_c4_g5	gi|955335328|ref|XP_014634393.1| PREDICTED: uncharacterized protein LOC100781792 [Glycine max] 1.0e-73	GO:0016021, integral component of membrane	-	28.1037	21.5178	18.1915	4.24178	10.6457	17.513	7.4001	5.52015	6.13945	4.53993	3.97471	10.2058	14.0727	7.56485	8.75433	4.56588	9.52336	13.6013
T_39701_c0_g1	gi|920692831|gb|KOM36056.1| hypothetical protein LR48_Vigan02g220600 [Vigna angularis] 1.1e-72	GO:0016021, integral component of membrane;GO:0031969, chloroplast membrane	-	3.61084	9.2879	7.73524	0.763779	3.74815	1.73686	29.1896	2.48967	4.81971	3.87815	4.22936	4.45752	4.91569	3.64907	0.394964	18.7135	13.6954	61.8494
T_39703_c0_g1	gi|356553042|ref|XP_003544867.1| PREDICTED: zinc finger protein CONSTANS-LIKE 9-like [Glycine max] 4.0e-195	GO:0003700, DNA binding transcription factor activity;GO:0005622, intracellular;GO:0005634, nucleus;GO:0005886, plasma membrane;GO:0008270, zinc ion binding	-	8.6783	10.392	10.0911	15.3138	12.3164	13.4587	19.2764	23.8781	18.7155	17.8779	9.57282	10.1758	11.1659	17.3167	7.77552	15.006	11.8473	13.9138
T_39704_c0_g1	gi|356508849|ref|XP_003523166.1| PREDICTED: probable serine/threonine-protein kinase At1g54610 [Glycine max] 8.7e-103	GO:0004674, protein serine/threonine kinase activity;GO:0005524, ATP binding	-	5.05761	6.73644	10.3837	12.384	10.4582	10.3376	15.0624	16.5283	15.8516	17.939	11.2359	12.249	15.184	18.9741	13.2713	12.9201	13.5059	6.01102
T_39705_c2_g1	gi|593696460|ref|XP_007148712.1| hypothetical protein PHAVU_005G008300g [Phaseolus vulgaris] 3.8e-27	GO:0004805, trehalose-phosphatase activity;GO:0005992, trehalose biosynthetic process	K01087-ko00500 Starch and sucrose metabolism	3.90669	7.27856	5.16627	3.79232	4.15931	10.781	4.2341	2.95068	5.15637	4.90146	4.79234	2.98695	8.86275	6.15767	2.71954	11.4401	10.8924	18.876
T_39713_c0_g1	gi|593471757|ref|XP_007140765.1| hypothetical protein PHAVU_008G140000g [Phaseolus vulgaris] 2.6e-09	GO:0016021, integral component of membrane	-	0.512596	1.5892	0.39129	3.3847	13.0787	7.70066	9.77696	12.268	19.4055	21.5341	2.5226	1.38305	7.16381	9.69749	1.72366	20.4608	10.5235	7.90382
T_39713_c3_g1	gi|356554294|ref|XP_003545483.1| PREDICTED: ETHYLENE INSENSITIVE 3-like 1 protein [Glycine max] 2.8e-125	GO:0000976, transcription regulatory region sequence-specific DNA binding;GO:0001666, response to hypoxia;GO:0003700, DNA binding transcription factor activity;GO:0005634, nucleus;GO:0006351, transcription, DNA-templated;GO:0006355, regulation of transcription, DNA-templated;GO:0009723, response to ethylene;GO:0009873, ethylene-activated signaling pathway;GO:0010182, sugar mediated signaling path…	K14514-ko04075 Plant hormone signal transduction;ko04016 MAPK signaling pathway - plant	41.4759	75.0204	130.375	103.188	155.137	119.85	168.486	188.508	100.371	184.891	190.539	156.477	145.38	85.5442	235.292	146.345	131.15	70.0329
T_39714_c2_g1	gi|734434744|gb|KHN47506.1| Branched-chain-amino-acid aminotransferase-like protein 3, chloroplastic [Glycine soja] 5.9e-119	GO:0004084, branched-chain-amino-acid transaminase activity;GO:0006532, aspartate biosynthetic process;GO:0008152, metabolic process;GO:0008153, para-aminobenzoic acid biosynthetic process;GO:0008696, 4-amino-4-deoxychorismate lyase activity;GO:0009098, leucine biosynthetic process;GO:0009099, valine biosynthetic process;GO:0009507, chloroplast;GO:0009570, chloroplast stroma;GO:0030170, pyridoxal…	-	10.0824	14.3591	10.6093	13.8628	21.5175	17.7545	18.2102	17.6536	25.4714	19.6696	18.1978	16.9059	25.2506	29.7827	25.6935	14.5101	16.0844	22.0516
T_39714_c2_g2	gi|920681048|gb|KOM27868.1| hypothetical protein LR48_Vigan468s003000 [Vigna angularis] 2.5e-142	GO:0005783, endoplasmic reticulum;GO:0006145, purine nucleobase catabolic process;GO:0008237, metallopeptidase activity;GO:0010136, ureide catabolic process;GO:0016813, hydrolase activity, acting on carbon-nitrogen (but not peptide) bonds, in linear amidines;GO:0046872, metal ion binding;GO:0047652, allantoate deiminase activity	K02083-ko00230 Purine metabolism	71.1688	72.3901	72.3795	180.937	120.158	136.799	147.292	167.283	77.3961	147.565	81.7136	82.6132	69.5422	113.375	78.6365	92.7531	52.6517	39.163
T_39715_c0_g1	gi|955340167|ref|XP_006586941.2| PREDICTED: probable LRR receptor-like serine/threonine-protein kinase At3g47570 isoform X1 [Glycine max] 1.9e-95	GO:0004674, protein serine/threonine kinase activity;GO:0005524, ATP binding;GO:0005886, plasma membrane;GO:0016021, integral component of membrane	-	29.4885	10.9237	4.86776	4.20434	1.07119	3.66223	9.83198	6.50979	1.00374	2.94092	6.32994	6.00406	3.48618	7.20077	4.75643	5.48618	3.10215	8.55934
T_39718_c1_g1	gi|356517578|ref|XP_003527464.1| PREDICTED: uncharacterized protein LOC100777823 [Glycine max] 1.5e-30	-	-	20.8889	14.773	42.9488	12.9718	35.7983	13.6799	85.6867	93.2852	33.7457	102.146	44.0292	7.57522	76.9674	83.3074	35.1303	190.262	90.2684	106.085
T_39718_c1_g3	gi|1012357630|gb|KYP68815.1| hypothetical protein KK1_022456 [Cajanus cajan] 5.7e-22	-	-	1.37401	2.15886	7.70225	4.46867	5.28635	2.09414	11.8579	12.5303	4.26363	15.37	5.60388	1.85269	14.7746	15.0148	7.69384	26.4358	5.50084	23.5024
T_39718_c1_g5	gi|356517576|ref|XP_003527463.1| PREDICTED: uncharacterized protein LOC100777298 [Glycine max] 3.4e-31	-	-	0.27969	1.04747	1.21988	0.278988	0.816282	0.0586968	4.00635	10.2011	1.32198	7.04523	1.80991	0.191957	3.41588	4.40407	1.90075	11.4294	4.09167	5.21169
T_39718_c1_g6	gi|955326266|ref|XP_014632309.1| PREDICTED: uncharacterized protein LOC100778894 isoform X1 [Glycine max] 2.3e-06	-	-	2.9484	2.92605	8.54378	3.60924	5.21596	1.88423	13.6614	18.1129	7.19016	13.5662	6.90378	1.81617	17.8376	10.7155	7.14737	26.5765	15.4513	20.3836
T_39719_c1_g1	gi|356554862|ref|XP_003545761.1| PREDICTED: proline iminopeptidase [Glycine max] 1.5e-192	GO:0004177, aminopeptidase activity;GO:0005829, cytosol;GO:0009507, chloroplast;GO:0016787, hydrolase activity	K01259-ko00330 Arginine and proline metabolism	62.081	37.3763	29.0489	14.7976	20.3381	20.5293	19.0857	18.2677	11.1904	14.3274	21.4635	15.0438	14.8081	15.7619	14.2506	13.3721	22.0592	24.7486
T_39723_c0_g1	gi|571456778|ref|XP_006580482.1| PREDICTED: NADP-dependent malic enzyme isoform X2 [Glycine max] 6.4e-93	GO:0004471, malate dehydrogenase (decarboxylating) (NAD+) activity;GO:0004473, malate dehydrogenase (decarboxylating) (NADP+) activity;GO:0005737, cytoplasm;GO:0006108, malate metabolic process;GO:0008948, oxaloacetate decarboxylase activity;GO:0046872, metal ion binding;GO:0051287, NAD binding	-	23.5114	32.0701	43.755	82.6534	92.3249	62.5272	66.5833	74.2626	79.6227	71.6953	48.4131	45.2429	57.1038	55.0289	53.6174	30.1138	36.8161	19.6618
T_39723_c0_g4	gi|356558791|ref|XP_003547686.1| PREDICTED: uncharacterized membrane protein At3g27390-like isoform X1 [Glycine max] 2.2e-71	GO:0005886, plasma membrane;GO:0016021, integral component of membrane	-	18.1997	9.21557	6.83058	4.59532	4.91763	7.51605	8.55877	5.28358	1.90923	3.4567	6.10747	3.12509	3.74299	2.95055	3.87606	4.47047	6.67114	7.28921
T_39728_c3_g5	gi|3152589|gb|AAC17070.1| Strong similarity to lupeol synthase gb|U49919 from A. thaliana (second gene in a series of three with similar homologies) [Arabidopsis thaliana] 5.8e-63	GO:0016866, intramolecular transferase activity	-	52.911	59.2253	37.2669	36.4347	25.1567	47.9152	28.7116	18.3698	14.4954	14.6566	20.6069	21.2573	16.298	9.28053	12.6563	13.8269	21.9603	47.5203
T_39732_c0_g9	gi|965599740|dbj|BAT86918.1| hypothetical protein VIGAN_05025000 [Vigna angularis var. angularis] 2.2e-42	GO:0003924, GTPase activity;GO:0005525, GTP binding;GO:0005739, mitochondrion;GO:0005777, peroxisome;GO:0007031, peroxisome organization;GO:0007049, cell cycle;GO:0042802, identical protein binding;GO:0051301, cell division	-	2.62975	3.19219	5.63347	4.48809	4.52058	5.62181	8.70283	12.0049	5.51513	7.97512	7.90349	5.11379	8.2907	5.93003	12.2066	2.84108	7.14068	0.971048
T_39733_c0_g5	gi|734432770|gb|KHN46416.1| hypothetical protein glysoja_031734 [Glycine soja] 5.9e-202	GO:0016021, integral component of membrane	-	25.628	54.5791	68.0411	14.625	52.799	21.0595	202.029	112.975	105.763	173.018	171.424	55.6232	112.14	126.485	127.473	249.66	191.841	145.739
T_39734_c1_g5	gi|356542553|ref|XP_003539731.1| PREDICTED: uncharacterized protein LOC100527596 [Glycine max] 7.1e-13	-	-	9.37456	5.90485	8.82295	20.181	20.1342	16.5166	20.2316	19.0882	29.3863	29.7077	20.5261	5.51651	35.9341	31.8024	30.6	37.3855	41.6763	62.4328
T_39735_c0_g6	gi|356530563|ref|XP_003533850.1| PREDICTED: CBL-interacting serine/threonine-protein kinase 23 [Glycine max] 4.4e-228	GO:0004674, protein serine/threonine kinase activity;GO:0005267, potassium channel activity;GO:0005524, ATP binding;GO:0005634, nucleus;GO:0005737, cytoplasm;GO:0005829, cytosol;GO:0005886, plasma membrane;GO:0006468, protein phosphorylation;GO:0007584, response to nutrient;GO:0009414, response to water deprivation;GO:0009536, plastid;GO:0010107, potassium ion import;GO:0010118, stomatal movement…	-	49.1587	30.5526	24.4402	15.561	12.7068	18.8166	18.0996	19.9042	12.7117	11.5814	17.5226	8.76517	13.8909	15.3883	12.5726	17.3537	18.1002	30.0276
T_39737_c1_g3	gi|870765728|gb|KMS65245.1| hypothetical protein BVRB_037930, partial [Beta vulgaris subsp. vulgaris] 4.5e-28	-	-	1.46264	1.33427	0.371691	1.31951	2.13119	2.64789	7.12371	0	0.910397	0.821429	4.42902	1.41512	0.180519	13.7825	6.85522	2.28065	4.40383	0
T_39740_c0_g5	gi|1012334890|gb|KYP46236.1| Putative ribonuclease H protein At1g65750 family [Cajanus cajan] 2.5e-98	GO:0003677, DNA binding;GO:0003700, DNA binding transcription factor activity;GO:0005634, nucleus;GO:0006351, transcription, DNA-templated;GO:0006355, regulation of transcription, DNA-templated;GO:0009651, response to salt stress;GO:0009737, response to abscisic acid;GO:0010089, xylem development;GO:0010150, leaf senescence;GO:0016032, viral process;GO:0045892, negative regulation of transcriptio…	-	10.5597	20.1436	41.0667	2.6259	4.614	2.28573	42.4032	18.0128	27.8271	15.3164	37.6096	4.0839	6.39369	7.14233	12.4749	89.5028	86.9044	79.7057
T_39742_c1_g2	gi|388497000|gb|AFK36566.1| unknown [Lotus japonicus] 2.8e-131	GO:0000272, polysaccharide catabolic process;GO:0004553, hydrolase activity, hydrolyzing O-glycosyl compounds;GO:0004568, chitinase activity;GO:0005576, extracellular region;GO:0005615, extracellular space;GO:0005764, lysosome;GO:0005975, carbohydrate metabolic process;GO:0006032, chitin catabolic process;GO:0006955, immune response;GO:0008061, chitin binding;GO:0008843, endochitinase activity;GO…	K01183-ko00520 Amino sugar and nucleotide sugar metabolism	2.34142	3.97003	3.72523	38.7231	22.6767	8.87834	26.8729	41.4018	31.8168	72.5831	14.5355	3.9408	41.1852	131.607	13.9121	143.755	61.9556	28.3423
T_39743_c3_g3	gi|734434136|gb|KHN47254.1| hypothetical protein glysoja_035045 [Glycine soja] 5.6e-72	-	-	8.5095	5.39018	4.07245	2.95171	1.61266	5.6594	2.46519	2.34981	1.53251	2.03423	1.26837	1.23246	2.60616	1.42682	1.32491	3.12622	2.34947	3.53538
T_39744_c1_g1	gi|1012364807|gb|KYP75989.1| Serine/threonine-protein kinase rio2 [Cajanus cajan] 2.1e-131	GO:0004672, protein kinase activity;GO:0004674, protein serine/threonine kinase activity;GO:0005524, ATP binding;GO:0005634, nucleus;GO:0005737, cytoplasm;GO:0006468, protein phosphorylation;GO:0042254, ribosome biogenesis;GO:0046872, metal ion binding	K07179-ko03008 Ribosome biogenesis in eukaryotes	20.3751	11.8469	9.66108	6.26979	6.8853	9.06225	7.4639	7.48227	4.59946	4.46891	6.1426	5.32807	5.88633	3.82825	6.3713	6.11976	6.23039	8.53076
T_39745_c0_g1	gi|1012334509|gb|KYP45867.1| TMV resistance protein N [Cajanus cajan] 4.8e-91	GO:0005524, ATP binding;GO:0005737, cytoplasm;GO:0007165, signal transduction;GO:0009626, plant-type hypersensitive response;GO:0043531, ADP binding	-	28.1182	12.2401	12.4722	4.5535	4.77778	9.24296	16.3896	8.48731	6.00568	4.91676	9.55907	4.21844	5.49194	2.19113	7.95937	3.36195	6.76224	4.74208
T_39746_c0_g1	gi|356558063|ref|XP_003547328.1| PREDICTED: WPP domain-associated protein-like [Glycine max] 0.0e+00	GO:0005794, Golgi apparatus	-	7.61238	5.20376	3.51027	1.51718	1.34868	3.3533	3.10688	2.97159	1.48152	1.34476	2.05268	2.04565	1.46782	1.37712	2.71641	2.40053	2.35642	6.26254
T_39748_c0_g3	gi|734399569|gb|KHN30935.1| Kinetochore protein spc25 [Glycine soja] 4.7e-107	GO:0000070, mitotic sister chromatid segregation;GO:0000778, condensed nuclear chromosome kinetochore;GO:0031262, Ndc80 complex;GO:0031617, NMS complex;GO:0044732, mitotic spindle pole body;GO:0051301, cell division;GO:0051321, meiotic cell cycle	-	10.8927	10.4808	11.4444	2.14978	5.82001	8.28173	6.13056	6.87229	4.00486	3.75318	3.6139	3.85303	4.46428	2.78444	4.54492	2.70071	6.18004	7.79296
T_39751_c3_g1	gi|734393117|gb|KHN28033.1| hypothetical protein glysoja_007765 [Glycine soja] 1.3e-55	-	-	16.282	31.5736	41.1854	3.68856	7.66199	5.76095	33.1494	20.9497	9.27169	28.1075	30.5629	8.96901	21.8439	12.0214	20.283	82.3141	63.5814	61.285
T_39752_c3_g3	gi|356515858|ref|XP_003526614.1| PREDICTED: glycine-rich protein 2-like [Glycine max] 5.2e-51	GO:0003677, DNA binding;GO:0003690, double-stranded DNA binding;GO:0003697, single-stranded DNA binding;GO:0003723, RNA binding;GO:0005634, nucleus;GO:0005737, cytoplasm;GO:0006355, regulation of transcription, DNA-templated;GO:0008270, zinc ion binding;GO:0009409, response to cold;GO:0009414, response to water deprivation;GO:0009631, cold acclimation;GO:0009651, response to salt stress;GO:001050…	-	4.96184	6.96541	6.27077	5.29713	5.84494	6.43691	7.41214	9.50083	7.42067	7.75205	7.18543	7.63412	10.0649	14.0026	12.9928	7.46714	6.94593	4.8964
T_39755_c7_g2	gi|356516343|ref|XP_003526855.1| PREDICTED: protein MKS1-like [Glycine max] 1.9e-81	GO:0005634, nucleus;GO:0006952, defense response;GO:0009870, defense response signaling pathway, resistance gene-dependent	K20725-ko04016 MAPK signaling pathway - plant	4.44738	4.50016	4.34787	12.1492	7.90933	6.07043	8.96461	9.84449	14.7818	11.9818	9.34627	7.82811	9.62717	19.4095	13.811	17.023	8.42266	8.56789
T_39764_c4_g2	gi|947079733|gb|KRH28522.1| hypothetical protein GLYMA_11G059100 [Glycine max] 1.5e-68	GO:0005789, endoplasmic reticulum membrane;GO:0016021, integral component of membrane;GO:0071458, integral component of cytoplasmic side of endoplasmic reticulum membrane;GO:0071782, endoplasmic reticulum tubular network;GO:0071786, endoplasmic reticulum tubular network organization	-	7.54441	6.55497	7.19801	0.150452	0.399777	0.243614	0.274961	0.161919	0.665502	0.494579	1.67304	4.35084	0.0610929	0.599425	0.284987	1.13654	1.28409	0.614533
T_39764_c4_g9	gi|734390134|gb|KHN26513.1| Protein LlR18B [Glycine soja] 6.1e-22	GO:0004864, protein phosphatase inhibitor activity;GO:0005634, nucleus;GO:0005737, cytoplasm;GO:0006952, defense response;GO:0009607, response to biotic stimulus;GO:0009738, abscisic acid-activated signaling pathway;GO:0010427, abscisic acid binding;GO:0016787, hydrolase activity;GO:0080163, regulation of protein serine/threonine phosphatase activity	-	8.56086	8.13106	2.11475	0.878753	1.52585	4.14785	1.56932	6.28588	1.15617	1.54587	0.638483	3.6517	1.77903	2.71349	1.67681	1.2864	1.04333	2.70023
T_39765_c0_g2	gi|734381052|gb|KHN23050.1| Carboxylesterase 1 [Glycine soja] 2.1e-140	GO:0008152, metabolic process;GO:0016787, hydrolase activity;GO:0052689, carboxylic ester hydrolase activity	-	2.34072	4.04633	4.69348	9.05931	11.7258	10.6483	8.02515	8.71143	13.6002	11.2101	8.71776	8.71192	13.3139	8.56967	7.34536	9.86764	8.09247	6.26448
T_39772_c1_g1	gi|571547783|ref|XP_006602699.1| PREDICTED: prosaposin-like isoform X2 [Glycine max] 8.3e-83	GO:0001664, G-protein coupled receptor binding;GO:0005615, extracellular space;GO:0005737, cytoplasm;GO:0005764, lysosome;GO:0006629, lipid metabolic process;GO:0006687, glycosphingolipid metabolic process;GO:0007193, adenylate cyclase-inhibiting G-protein coupled receptor signaling pathway;GO:0008047, enzyme activator activity;GO:0019216, regulation of lipid metabolic process;GO:0060736, prostat…	K12382-ko04142 Lysosome	214.689	88.3872	41.2968	13.7277	24.2977	42.3082	20.5343	19.0178	14.8854	9.83541	25.4259	24.8312	22.5715	11.3532	18.9291	19.3386	25.4438	59.2894
T_39779_c0_g1	gi|571478728|ref|XP_006587651.1| PREDICTED: probable LRR receptor-like serine/threonine-protein kinase At3g47570 isoform X2 [Glycine max] 5.6e-81	GO:0004674, protein serine/threonine kinase activity;GO:0005524, ATP binding;GO:0005886, plasma membrane;GO:0016021, integral component of membrane	-	7.25835	8.48037	4.74755	2.30631	3.58905	0.970845	9.16877	2.90889	0.406411	1.81917	1.99716	0.766402	0.856833	0.524742	2.74912	2.66411	3.90114	1.29313
T_39783_c0_g1	gi|571549645|ref|XP_006602977.1| PREDICTED: kanadaptin-like [Glycine max] 0.0e+00	GO:0005634, nucleus;GO:0005654, nucleoplasm;GO:0005737, cytoplasm;GO:0005886, plasma membrane;GO:0043231, intracellular membrane-bounded organelle	-	18.486	12.4904	8.25762	4.1109	3.19748	4.32244	3.78926	5.78737	4.65073	3.26379	5.13934	6.00968	4.72952	3.23501	4.57248	7.61306	7.78764	6.58183
T_39785_c0_g1	gi|593266232|ref|XP_007135294.1| hypothetical protein PHAVU_010G117200g [Phaseolus vulgaris] 2.4e-116	GO:0003700, DNA binding transcription factor activity;GO:0005634, nucleus;GO:0006351, transcription, DNA-templated;GO:0009414, response to water deprivation;GO:0009737, response to abscisic acid;GO:0043565, sequence-specific DNA binding;GO:0045893, positive regulation of transcription, DNA-templated	-	75.6272	50.8434	36.6008	2.6942	2.67668	4.76883	5.07692	8.04742	3.34224	3.67128	14.5943	16.3445	5.52866	4.36584	5.28993	12.0743	21.1399	31.5098
T_39786_c4_g2	gi|571517692|ref|XP_006597580.1| PREDICTED: protein DETOXIFICATION 40 [Glycine max] 2.1e-166	GO:0005773, vacuole;GO:0005774, vacuolar membrane;GO:0006855, drug transmembrane transport;GO:0015238, drug transmembrane transporter activity;GO:0015297, antiporter activity;GO:0016021, integral component of membrane	-	8.90092	13.3737	12.4746	39.5109	26.9638	23.0222	37.6845	45.0886	91.0029	91.9901	37.4929	28.4488	71.0886	156.94	44.6416	68.5274	58.9342	51.5141
T_39788_c1_g1	gi|734425857|gb|KHN43534.1| hypothetical protein glysoja_002117 [Glycine soja] 0.0e+00	GO:0008270, zinc ion binding	-	21.2107	13.8549	9.08939	6.42056	3.96094	7.77201	7.79343	8.92023	3.91592	4.04798	4.86994	5.44006	5.92941	5.37749	6.02943	11.4151	10.6526	22.0759
T_39790_c2_g1	gi|356525586|ref|XP_003531405.1| PREDICTED: U-box domain-containing protein 27-like [Glycine max] 9.9e-195	GO:0004842, ubiquitin-protein transferase activity;GO:0010200, response to chitin;GO:0016874, ligase activity	-	25.9264	31.5108	20.138	29.6957	39.6735	31.9191	57.8684	54.19	34.4427	62.4255	45.2382	31.4602	44.5697	54.0805	38.3919	63.5798	55.1376	37.1751
T_39790_c2_g2	gi|356502370|ref|XP_003519992.1| PREDICTED: U-box domain-containing protein 28-like [Glycine max] 1.7e-154	GO:0004842, ubiquitin-protein transferase activity;GO:0010200, response to chitin;GO:0016874, ligase activity	-	3.04727	5.66807	4.09849	5.82852	10.9739	5.00699	5.54954	7.37172	10.2827	10.1561	8.97066	7.08172	12.4457	19.1593	10.1068	14.9558	12.9073	7.42553
T_39790_c2_g3	gi|950937060|ref|XP_014519912.1| PREDICTED: vacuolar protein sorting-associated protein 24 homolog 1 [Vigna radiata var. radiata] 2.8e-93	GO:0000815, ESCRT III complex;GO:0005622, intracellular;GO:0005770, late endosome;GO:0005829, cytosol;GO:0007034, vacuolar transport;GO:0015031, protein transport;GO:0070676, intralumenal vesicle formation	K12193-ko04144 Endocytosis	43.3966	13.7563	13.2303	8.86091	7.65931	11.7694	10.8248	9.3832	7.3198	6.07967	7.92061	5.80938	5.47369	9.70999	9.08933	8.56015	10.0316	19.8024
T_39792_c2_g1	gi|356540613|ref|XP_003538782.1| PREDICTED: transcription factor bHLH25-like [Glycine max] 9.2e-76	GO:0003677, DNA binding;GO:0003700, DNA binding transcription factor activity;GO:0005634, nucleus;GO:0006351, transcription, DNA-templated;GO:0006355, regulation of transcription, DNA-templated	-	1.90921	6.3941	12.6887	1.38731	2.364	1.56853	26.903	8.4098	22.2174	17.9134	33.5485	4.64131	8.63158	7.22507	15.7249	64.6907	66.182	66.7753
T_39792_c2_g2	gi|734378582|gb|KHN22139.1| Transcription factor bHLH25 [Glycine soja] 5.4e-107	GO:0003677, DNA binding;GO:0003700, DNA binding transcription factor activity;GO:0005634, nucleus;GO:0006351, transcription, DNA-templated;GO:0006355, regulation of transcription, DNA-templated;GO:0032440, 2-alkenal reductase [NAD(P)] activity	-	59.7933	36.7047	25.2858	16.996	22.8481	16.9726	27.9151	28.0341	14.7838	15.471	16.8023	12.8083	12.369	10.6762	16.06	16.5676	22.615	30.9409
T_39795_c2_g2	gi|734411940|gb|KHN36326.1| Homeobox-leucine zipper protein HAT22 [Glycine soja] 3.7e-124	GO:0003700, DNA binding transcription factor activity;GO:0005634, nucleus;GO:0006351, transcription, DNA-templated;GO:0009735, response to cytokinin;GO:0043565, sequence-specific DNA binding	-	32.133	28.3933	26.4267	15.5327	9.29668	9.92328	18.4383	15.4281	9.89045	13.0399	20.5401	20.0819	15.9035	25.2935	19.688	17.3793	21.0819	21.005
T_39799_c1_g2	gi|947075286|gb|KRH24126.1| hypothetical protein GLYMA_12G023200 [Glycine max] 5.5e-79	GO:0016021, integral component of membrane	-	1.51183	3.36976	2.66001	2.13152	4.18969	4.8824	1.9409	1.81044	4.26138	2.0275	7.18837	6.34777	5.53625	2.35709	8.71944	4.35133	3.30087	1.64239
T_39799_c1_g6	gi|356532076|ref|XP_003534600.1| PREDICTED: glutamic acid-rich protein [Glycine max] 9.8e-74	-	-	18.5735	9.69829	7.29857	4.44943	4.55444	7.57975	5.37063	5.32071	4.57508	4.39495	5.04261	4.87386	4.46047	3.84365	3.51275	2.74085	3.77369	5.51953
T_39804_c0_g2	gi|356566413|ref|XP_003551426.1| PREDICTED: WEB family protein At5g55860-like [Glycine max] 1.7e-228	GO:0005829, cytosol;GO:0005886, plasma membrane;GO:0009903, chloroplast avoidance movement;GO:0009904, chloroplast accumulation movement	-	14.0959	9.50162	5.28327	3.04788	2.81589	3.38916	6.78843	7.70034	2.49521	3.08448	4.72893	2.88911	3.02461	2.48031	4.2883	6.3519	3.72605	7.17959
T_39810_c1_g1	gi|356509208|ref|XP_003523343.1| PREDICTED: probable mitochondrial chaperone bcs1 [Glycine max] 1.4e-240	GO:0005524, ATP binding;GO:0016021, integral component of membrane;GO:0016887, ATPase activity	-	5.80508	7.8309	7.28085	9.27798	7.0558	6.9096	9.566	7.95915	14.4129	13.7413	10.6737	7.58976	10.5371	12.7107	11.4619	28.1012	19.0383	14.3609
T_39810_c4_g1	gi|734409880|gb|KHN35404.1| Cytochrome P450 78A3 [Glycine soja] 7.5e-267	GO:0004497, monooxygenase activity;GO:0005506, iron ion binding;GO:0016020, membrane;GO:0016021, integral component of membrane;GO:0016705, oxidoreductase activity, acting on paired donors, with incorporation or reduction of molecular oxygen;GO:0016709, oxidoreductase activity, acting on paired donors, with incorporation or reduction of molecular oxygen, NAD(P)H as one donor, and incorporation of…	-	26.5167	27.4222	33.6218	77.1926	47.1694	25.1304	78.4511	75.0961	65.2737	63.8598	85.677	66.3386	69.5328	97.7653	127.484	77.0784	55.5927	42.7033
T_39812_c1_g1	gi|734399008|gb|KHN30766.1| Putative calcium-transporting ATPase 13, plasma membrane-type [Glycine soja] 3.0e-176	GO:0005388, calcium-transporting ATPase activity;GO:0005524, ATP binding;GO:0005887, integral component of plasma membrane;GO:0043231, intracellular membrane-bounded organelle;GO:0046872, metal ion binding	-	5.68644	14.032	23.2119	3.92085	9.48999	3.43835	13.162	2.80436	1.71169	6.6304	4.88985	7.25426	1.87168	1.6606	4.15077	7.73055	4.94538	5.75822
T_39815_c2_g4	gi|947059763|gb|KRH09169.1| hypothetical protein GLYMA_16G200500 [Glycine max] 1.4e-46	-	-	8.78537	4.38778	3.79933	2.40517	2.0995	2.95437	1.89888	4.95307	1.68248	2.38193	4.18111	2.79846	1.97853	1.99483	1.91425	2.31894	2.07642	3.11331
T_39820_c0_g1	gi|947085525|gb|KRH34246.1| hypothetical protein GLYMA_10G172200 [Glycine max] 9.3e-267	GO:0004373, glycogen (starch) synthase activity;GO:0009501, amyloplast;GO:0009507, chloroplast;GO:0019252, starch biosynthetic process;GO:0033840, NDP-glucose-starch glucosyltransferase activity	-	48.1017	57.5318	77.0181	41.0593	34.1359	29.9778	49.9237	63.6329	13.8741	44.3816	61.3112	32.9586	21.8137	19.7038	32.7729	64.4505	32.5848	36.9584
T_39824_c2_g3	gi|571467246|ref|XP_006583882.1| PREDICTED: bZIP transcription factor TRAB1-like [Glycine max] 2.2e-129	GO:0003700, DNA binding transcription factor activity;GO:0004553, hydrolase activity, hydrolyzing O-glycosyl compounds;GO:0005576, extracellular region;GO:0005618, cell wall;GO:0005886, plasma membrane;GO:0005975, carbohydrate metabolic process;GO:0006952, defense response;GO:0009506, plasmodesma;GO:0030247, polysaccharide binding;GO:0031225, anchored component of membrane;GO:0042973, glucan endo…	K14432-ko04075 Plant hormone signal transduction	30.3251	26.6337	28.5716	8.1792	8.85541	10.0056	14.4541	13.3365	9.04502	8.14955	9.99792	9.85051	8.47955	7.43743	8.62798	13.7481	16.3087	18.5802
T_39825_c1_g1	gi|571483506|ref|XP_003536194.2| PREDICTED: 65-kDa microtubule-associated protein 3 [Glycine max] 0.0e+00	GO:0000226, microtubule cytoskeleton organization;GO:0000280, nuclear division;GO:0000910, cytokinesis;GO:0000911, cytokinesis by cell plate formation;GO:0005634, nucleus;GO:0005874, microtubule;GO:0008017, microtubule binding;GO:0009524, phragmoplast;GO:0009574, preprophase band;GO:0009624, response to nematode;GO:0046785, microtubule polymerization;GO:0052096, formation by symbiont of syncytium…	-	9.91522	10.0133	8.86676	1.86942	4.87986	9.53765	3.59691	5.09944	3.70066	2.36451	4.14886	4.86249	4.24255	2.46193	4.34051	2.85703	4.49601	6.18521
T_39832_c0_g4	gi|1012361864|gb|KYP73047.1| putative calcium-binding protein CML27 [Cajanus cajan] 1.3e-68	GO:0005509, calcium ion binding;GO:0005773, vacuole;GO:0005886, plasma membrane	-	14.3967	17.1165	33.5363	8.86022	10.2224	7.83146	30.4597	21.5043	15.4109	21.7353	24.7363	10.4976	18.5709	32.9731	19.3591	56.1642	68.1897	46.5023
T_39832_c0_g6	gi|356520641|ref|XP_003528969.1| PREDICTED: probable calcium-binding protein CML18 [Glycine max] 1.4e-85	GO:0005509, calcium ion binding	-	15.1757	16.5118	15.147	10.7871	17.6585	20.171	10.5907	7.97987	17.7975	9.30391	13.3202	18.4575	26.0311	13.8773	24.4523	21.952	28.0072	47.3152
T_39832_c0_g7	gi|356507536|ref|XP_003522520.1| PREDICTED: UNC93-like protein 1 [Glycine max] 2.7e-207	GO:0016021, integral component of membrane	-	4.15086	6.59919	7.78693	11.8869	13.0567	11.9708	15.8321	17.9176	22.3904	15.8645	13.8434	11.2965	13.3945	19.364	11.4002	12.1072	8.05921	8.90644
T_39835_c3_g2	-	-	-	2.34721	1.72066	1.52401	1.87771	2.00529	2.56172	4.88361	3.15752	5.10683	1.77744	2.98887	1.51925	4.20472	6.92717	4.00922	3.18756	5.04941	3.39779
T_39839_c1_g1	gi|734388784|gb|KHN25908.1| hypothetical protein glysoja_018762 [Glycine soja] 7.2e-46	-	-	6.21567	10.6814	3.74775	9.61029	14.6501	21.3254	8.6928	3.73819	18.7225	7.125	3.37099	11.4127	12.297	4.04345	4.01621	1.48027	6.20534	5.95057
T_39842_c1_g2	gi|356570666|ref|XP_003553506.1| PREDICTED: probable LRR receptor-like serine/threonine-protein kinase At4g08850 [Glycine max] 1.3e-196	GO:0004672, protein kinase activity;GO:0004674, protein serine/threonine kinase activity;GO:0005524, ATP binding;GO:0016021, integral component of membrane	-	13.0385	11.356	7.67642	7.49298	7.05626	6.80993	17.5738	9.73023	4.20933	9.12896	11.2201	6.24379	7.93997	9.72225	7.97057	24.9145	17.4613	27.6354
T_39842_c1_g4	gi|734316996|gb|KHN02478.1| Leucine-rich repeat receptor-like serine/threonine-protein kinase BAM3 [Glycine soja] 2.9e-16	GO:0004672, protein kinase activity	-	2.54898	2.0025	2.72412	0.459019	0.804495	0.616514	5.53812	3.79111	0.761829	2.29606	3.39608	0.437944	2.74965	3.80688	1.10076	11.0855	3.34505	11.205
T_39843_c0_g1	gi|1012356647|gb|KYP67833.1| Protein IDA-LIKE 2 [Cajanus cajan] 3.7e-27	GO:0005615, extracellular space;GO:0010227, floral organ abscission	-	3.05025	3.29592	3.72038	2.86604	5.42635	3.53929	4.51362	5.26943	5.42617	6.86459	3.81344	2.77096	7.38809	5.57329	6.20806	9.25507	5.04713	7.31209
T_39846_c2_g2	gi|1012363476|gb|KYP74659.1| Myb-related protein Myb4 [Cajanus cajan] 1.8e-129	GO:0003677, DNA binding;GO:0005634, nucleus;GO:0006351, transcription, DNA-templated;GO:0006355, regulation of transcription, DNA-templated	-	14.0495	10.9103	11.2081	3.96987	4.83486	4.84609	6.29826	8.74781	4.72874	3.40394	4.49382	3.47373	5.30848	2.83275	6.68676	6.21493	8.03961	8.09415
T_39848_c0_g1	gi|356549451|ref|XP_003543107.1| PREDICTED: pathogenesis-related protein 1-like [Glycine max] 6.0e-76	GO:0005576, extracellular region;GO:0006952, defense response;GO:0009607, response to biotic stimulus	K13449-ko04016 MAPK signaling pathway - plant;ko04075 Plant hormone signal transduction	9.32746	1.99477	6.89842	24.7626	62.9681	23.0458	22.7149	28.2073	38.2691	22.294	15.5063	4.12112	13.7347	43.2932	11.5221	23.6634	34.0004	20.1153
T_39850_c1_g1	gi|357482557|ref|XP_003611565.1| ADP-ribosylation factor-like protein A1D [Medicago truncatula] 3.7e-101	GO:0005525, GTP binding;GO:0005622, intracellular;GO:0005737, cytoplasm;GO:0005765, lysosomal membrane;GO:0007059, chromosome segregation;GO:0007264, small GTPase mediated signal transduction;GO:0016020, membrane;GO:0030496, midbody;GO:0031902, late endosome membrane;GO:0051233, spindle midzone;GO:0051301, cell division;GO:0070062, extracellular exosome	-	42.5621	40.1564	40.1282	14.8995	29.3582	27.4726	23.4616	27.9565	14.1778	17.8907	23.5148	21.0727	20.8183	15.141	15.5675	28.0045	24.466	41.1639
T_39855_c0_g3	gi|734357628|gb|KHN14583.1| Putative lipid-transfer protein DIR1 [Glycine soja] 1.4e-36	GO:0005504, fatty acid binding;GO:0005783, endoplasmic reticulum;GO:0006869, lipid transport;GO:0008270, zinc ion binding;GO:0009506, plasmodesma;GO:0009862, systemic acquired resistance, salicylic acid mediated signaling pathway;GO:0043621, protein self-association;GO:0048046, apoplast	-	35.3503	35.9542	63.3919	76.7131	63.7888	26.2152	95.2788	148.819	38.7128	79.5655	91.0661	38.0999	63.4945	27.358	57.5081	109.6	18.245	33.4845
T_39863_c1_g4	gi|734374879|gb|KHN20788.1| hypothetical protein glysoja_037388, partial [Glycine soja] 3.3e-42	-	-	12.7898	7.41225	7.03474	2.94824	1.57598	1.84572	1.90063	2.01821	2.60966	1.14613	0.981506	4.35802	1.77905	1.10249	1.50025	1.36235	2.96974	3.61882
T_39864_c0_g1	gi|955391648|ref|XP_014627871.1| PREDICTED: protein ENHANCED DISEASE RESISTANCE 2-like [Glycine max] 2.3e-14	-	-	22.2464	22.2579	12.4418	6.6488	7.62705	10.1183	10.1398	10.0093	7.92237	5.47843	9.20122	6.71624	5.73561	7.45432	7.18047	5.42175	6.3692	8.32737
T_39871_c0_g2	gi|1012333877|gb|KYP45255.1| U4/U6.U5 tri-snRNP-associated protein 2 [Cajanus cajan] 5.9e-306	GO:0000245, spliceosomal complex assembly;GO:0000398, mRNA splicing, via spliceosome;GO:0005654, nucleoplasm;GO:0005681, spliceosomal complex;GO:0006397, mRNA processing;GO:0007049, cell cycle;GO:0008270, zinc ion binding;GO:0008380, RNA splicing;GO:0016579, protein deubiquitination;GO:0036459, thiol-dependent ubiquitinyl hydrolase activity;GO:0051301, cell division	K12847-ko03040 Spliceosome	14.216	11.2452	9.6731	5.39202	7.48976	8.68938	8.43053	6.93097	6.27755	5.41526	8.17835	5.34557	5.27021	4.85677	5.86404	4.93196	6.69039	7.28597
T_39873_c1_g1	gi|356510471|ref|XP_003523961.1| PREDICTED: protein spotted leaf 11-like [Glycine max] 1.8e-118	GO:0005634, nucleus;GO:0005737, cytoplasm	-	4.49765	3.62777	2.91579	5.71285	7.20376	6.52913	5.22211	5.90935	9.29777	8.09669	7.48449	9.09212	7.72953	9.95961	14.2697	6.2265	4.76825	5.425
T_39877_c1_g1	gi|955364413|ref|XP_014622591.1| PREDICTED: MADS-box transcription factor 23-like isoform X4 [Glycine max] 1.2e-90	GO:0003677, DNA binding;GO:0003700, DNA binding transcription factor activity;GO:0005634, nucleus;GO:0006351, transcription, DNA-templated	-	13.518	5.11262	3.69912	2.54269	2.28287	3.89934	5.15894	1.92726	1.57481	0.617939	2.54167	2.22977	2.47103	2.08712	2.30073	3.0198	1.78076	2.88906
T_39877_c1_g4	gi|734373916|gb|KHN20526.1| Beta-glucosidase 40 [Glycine soja] 8.4e-289	GO:0005975, carbohydrate metabolic process;GO:0008422, beta-glucosidase activity;GO:0009507, chloroplast;GO:0048046, apoplast;GO:0102483, scopolin beta-glucosidase activity;GO:1901657, glycosyl compound metabolic process	K01188-ko00940 Phenylpropanoid biosynthesis;ko00460 Cyanoamino acid metabolism;ko00500 Starch and sucrose metabolism	16.205	9.81009	6.97911	1.7947	2.58559	5.44691	2.12065	1.65197	1.94963	1.50287	2.69673	4.14606	2.11107	1.65299	2.34726	1.1736	4.08116	5.2482
T_39877_c1_g7	-	-	-	32.7107	39.7073	57.7235	74.2629	35.9546	32.0923	111.032	49.7131	50.6268	58.2542	46.9683	44.7203	89.3236	131.159	86.8755	41.6619	46.3547	23.8028
T_39878_c0_g2	gi|571501674|ref|XP_006594833.1| PREDICTED: TBC1 domain family member 5 homolog A-like [Glycine max] 5.7e-44	-	-	15.686	6.79797	3.17953	3.36439	5.52662	5.11643	4.40619	6.41992	4.31027	2.69228	3.76616	5.64654	2.14955	3.68162	3.77319	1.90182	2.91885	2.52265
T_39883_c2_g2	gi|947092914|gb|KRH41499.1| hypothetical protein GLYMA_08G033800 [Glycine max] 1.3e-121	GO:0004722, protein serine/threonine phosphatase activity;GO:0046872, metal ion binding	K14497-ko04016 MAPK signaling pathway - plant;ko04075 Plant hormone signal transduction	14.0821	25.593	29.8471	1.03843	1.45031	3.09443	5.17814	4.85711	1.94867	2.42272	9.15369	13.2965	2.88413	6.29895	4.14884	10.0403	11.1522	11.8115
T_39886_c0_g1	gi|356510355|ref|XP_003523904.1| PREDICTED: urea-proton symporter DUR3 [Glycine max] 7.0e-202	GO:0005887, integral component of plasma membrane;GO:0015204, urea transmembrane transporter activity;GO:0015293, symporter activity;GO:0071918, urea transmembrane transport	-	4.11642	4.90074	3.78649	8.29756	5.91089	6.0166	7.23539	8.19217	7.02002	10.6921	5.67803	3.46439	10.4956	9.83022	7.00219	7.39801	7.21321	9.16911
T_39888_c2_g3	-	-	-	0.36205	0	0	152.218	3.86504	8.26491	27.0952	38.5885	17.99	82.1725	8.25503	18.9831	0.705792	18.228	50.9561	5.78377	44.2557	21.3964
T_39896_c3_g3	gi|947124479|gb|KRH72685.1| hypothetical protein GLYMA_02G227500 [Glycine max] 4.1e-237	GO:0030246, carbohydrate binding	-	30.2682	31.5594	23.9165	4.48671	21.0041	24.5795	12.5724	7.32342	10.8369	8.3134	6.5851	17.5809	14.9176	4.8571	10.9465	7.42756	19.4296	19.5175
T_39897_c0_g2	gi|947059557|gb|KRH08963.1| hypothetical protein GLYMA_16G184200 [Glycine max] 5.8e-88	GO:0004674, protein serine/threonine kinase activity;GO:0005524, ATP binding;GO:0016021, integral component of membrane	-	10.4359	9.959	9.5503	1.57362	2.94372	4.7278	13.6349	8.87029	3.49061	4.20841	6.35908	1.81578	4.04019	12.5049	7.17687	5.97242	3.09837	7.20776
T_39898_c0_g7	gi|947079029|gb|KRH27818.1| hypothetical protein GLYMA_11G015900 [Glycine max] 7.1e-161	GO:0003723, RNA binding	-	12.0363	9.32038	6.48904	3.55766	3.17604	6.78286	4.73927	5.78569	3.80266	1.83494	4.40792	3.52871	2.99995	2.4588	3.1375	2.84783	3.93105	5.48628
T_39899_c2_g4	gi|763769654|gb|KJB36869.1| hypothetical protein B456_006G179900 [Gossypium raimondii] 3.1e-162	GO:0003924, GTPase activity;GO:0005200, structural constituent of cytoskeleton;GO:0005525, GTP binding;GO:0005737, cytoplasm;GO:0005874, microtubule;GO:0005886, plasma membrane;GO:0007017, microtubule-based process;GO:0009409, response to cold;GO:0009651, response to salt stress;GO:0015630, microtubule cytoskeleton;GO:0016021, integral component of membrane	-	3.85178	5.21979	3.13107	20.3899	21.9345	15.3913	15.8684	11.9313	7.65151	14.2443	10.5251	8.92394	5.00871	6.07047	36.8349	1.48319	6.18069	11.364
T_39899_c2_g8	gi|734418181|gb|KHN39426.1| Tubulin beta-1 chain [Glycine soja] 4.6e-89	GO:0003924, GTPase activity;GO:0005200, structural constituent of cytoskeleton;GO:0005525, GTP binding;GO:0005737, cytoplasm;GO:0005874, microtubule;GO:0007017, microtubule-based process	-	6.53111	14.4902	26.6226	17.4387	44.7682	61.0482	17.9388	10.3935	53.3447	22.7054	20.6946	45.8499	52.0797	29.6624	13.535	8.95521	31.986	14.214
T_39900_c0_g1	gi|955377046|ref|XP_014624690.1| PREDICTED: uncharacterized protein LOC100778412 isoform X1 [Glycine max] 2.7e-202	GO:0000122, negative regulation of transcription by RNA polymerase II;GO:0005634, nucleus;GO:0006346, methylation-dependent chromatin silencing;GO:0006351, transcription, DNA-templated;GO:0006355, regulation of transcription, DNA-templated;GO:0008327, methyl-CpG binding	-	8.03419	4.51706	4.67887	2.37823	2.38381	3.69553	2.59082	3.39714	2.01302	2.11974	3.28971	2.28036	2.27076	1.54921	2.06582	2.75011	3.03262	3.19001
T_39901_c1_g2	gi|734383540|gb|KHN23980.1| Putative transporter MCH1 [Glycine soja] 5.7e-256	GO:0000741, karyogamy;GO:0006810, transport;GO:0009651, response to salt stress;GO:0010197, polar nucleus fusion;GO:0016021, integral component of membrane	-	2.51523	3.40893	4.56801	8.22161	7.91512	4.80513	8.18419	11.2788	11.491	9.6264	8.13084	4.72277	6.81656	7.74307	6.589	8.89937	3.28897	4.23505
T_39907_c0_g4	gi|955360992|ref|XP_006594622.2| PREDICTED: uncharacterized protein LOC100794998 [Glycine max] 1.9e-42	GO:0016021, integral component of membrane	-	9.47526	19.0094	22.5226	1.71394	4.52354	3.31125	9.59139	6.46953	5.90293	8.51314	14.3499	10.6107	8.10358	9.89161	7.49845	15.4445	19.9915	17.822
T_39908_c1_g6	gi|947015816|gb|KRG68574.1| hypothetical protein GLYMA_U007300 [Glycine max] 3.5e-61	-	-	2800.29	596.121	986.674	387.216	139.213	888.656	365.837	256.05	224.572	594.919	525.073	1285.07	2068.3	383.991	354.396	344.174	651.917	826.409
T_39911_c1_g1	gi|950952778|ref|XP_014496014.1| PREDICTED: uncharacterized protein LOC106757748 [Vigna radiata var. radiata] 4.5e-77	-	-	17.9926	31.1962	65.0073	3.86677	3.66836	2.79593	11.5025	6.52708	7.16346	10.3222	23.1632	26.6823	10.8768	23.9423	8.03571	51.6175	38.6336	27.7191
T_39913_c0_g1	gi|351727333|ref|NP_001237413.1| uncharacterized protein LOC100500653 [Glycine max] 3.7e-45	GO:0016021, integral component of membrane	-	34.1273	29.382	30.3408	8.33865	5.87782	8.05334	12.1253	9.40711	6.68865	8.02447	14.5256	6.34299	8.01788	8.32596	4.61659	11.7235	25.3337	26.1055
T_39915_c0_g2	gi|83853812|gb|ABC47845.1| N-hydroxycinnamoyl/benzoyltransferase 3 [Glycine max] 6.8e-167	GO:0016747, transferase activity, transferring acyl groups other than amino-acyl groups	-	17.4349	16.2348	17.1032	71.2391	54.7687	41.0488	47.7775	51.4702	82.5164	90.278	52.324	38.6573	113.091	83.5185	65.2374	56.2051	75.079	60.671
T_39918_c1_g1	gi|593692242|ref|XP_007146663.1| hypothetical protein PHAVU_006G059100g [Phaseolus vulgaris] 1.0e-51	-	-	209.733	134.579	107.935	60.0101	68.5975	86.7643	104.89	106.818	44.2338	62.6865	62.6488	67.326	53.0683	50.1233	57.2578	61.8518	76.6888	113.11
T_39919_c0_g1	gi|734355977|gb|KHN14039.1| Ninja-family protein AFP2 [Glycine soja] 7.9e-64	GO:0005634, nucleus;GO:0007165, signal transduction	-	35.6793	49.4309	80.089	26.7701	26.1268	23.8637	27.6753	26.5459	19.6973	22.3141	29.6736	36.3867	20.8373	20.8447	21.8553	30.6165	40.3118	31.6099
T_39921_c2_g1	gi|951070135|ref|XP_014490574.1| PREDICTED: uncharacterized protein LOC106753294 [Vigna radiata var. radiata] 3.2e-66	-	-	100.075	57.8378	102.662	106.949	29.2911	33.1234	28.0681	62.7074	6.41629	37.9837	86.8951	75.339	48.0733	15.3421	28.9642	81.589	17.2429	27.8875
T_39923_c2_g1	gi|351721632|ref|NP_001236704.1| uncharacterized protein LOC100526973 [Glycine max] 9.3e-87	-	-	237.8	81.4013	60.563	21.3651	28.364	61.0827	21.6245	21.2228	17.3853	15.7076	21.1062	32.9522	31.3919	19.014	24.6041	19.1665	43.7869	52.5169
T_39925_c3_g4	gi|947068959|gb|KRH17850.1| hypothetical protein GLYMA_13G021500 [Glycine max] 4.9e-73	-	-	2619.45	419.933	796.535	381.647	90.7827	710.554	306.556	204.601	142.163	474.388	519.89	1042.16	1683.16	317.083	315.549	279.396	552.606	592.312
T_39928_c3_g2	gi|255642311|gb|ACU21420.1| unknown [Glycine max] 1.1e-137	GO:0005829, cytosol;GO:0006541, glutamine metabolic process	-	18.6155	15.1192	11.8952	64.6228	43.3776	13.8441	51.0387	70.5132	46.2878	99.6825	19.0561	11.7498	72.6312	132.968	47.4887	162.139	45.2597	42.2086
T_39930_c2_g1	gi|734366491|gb|KHN18055.1| hypothetical protein glysoja_043442, partial [Glycine soja] 1.8e-27	-	-	81.1134	98.0181	68.2831	39.9242	59.701	47.1858	177.593	134.818	91.9733	129.83	180.891	79.8204	119.427	132.978	160.356	166.469	192.891	220.91
T_39933_c3_g1	gi|571439073|ref|XP_006574748.1| PREDICTED: uncharacterized protein LOC100786282 isoform X2 [Glycine max] 7.0e-209	GO:0003677, DNA binding;GO:0003700, DNA binding transcription factor activity;GO:0005634, nucleus;GO:0006351, transcription, DNA-templated;GO:0006355, regulation of transcription, DNA-templated	-	18.8228	9.38624	6.67321	2.57482	2.50946	4.50569	4.18615	4.29028	2.18935	1.94589	2.06759	4.70579	1.82224	1.32147	2.81006	2.37607	5.08201	9.58026
T_39941_c3_g1	gi|571553576|ref|XP_003554259.2| PREDICTED: ATP-dependent zinc metalloprotease YME1L1-like [Glycine max] 9.1e-237	GO:0005524, ATP binding;GO:0005739, mitochondrion;GO:0005783, endoplasmic reticulum;GO:0009409, response to cold;GO:0009414, response to water deprivation;GO:0009651, response to salt stress;GO:0009737, response to abscisic acid;GO:0010154, fruit development;GO:0010431, seed maturation;GO:0016021, integral component of membrane;GO:0016887, ATPase activity;GO:0031966, mitochondrial membrane	-	10.331	11.157	18.3442	14.3821	9.28251	6.27357	16.5436	14.7749	11.2466	25.4767	11.6216	4.66714	15.6641	21.9989	6.66087	71.016	40.4449	24.3356
T_39941_c3_g6	gi|571549028|ref|XP_006602893.1| PREDICTED: probable mitochondrial chaperone BCS1-B [Glycine max] 8.2e-226	GO:0005524, ATP binding;GO:0005739, mitochondrion;GO:0005783, endoplasmic reticulum;GO:0009409, response to cold;GO:0009414, response to water deprivation;GO:0009651, response to salt stress;GO:0009737, response to abscisic acid;GO:0010154, fruit development;GO:0010431, seed maturation;GO:0016021, integral component of membrane;GO:0016887, ATPase activity;GO:0031966, mitochondrial membrane	-	11.2076	6.80355	4.01678	16.7205	8.45482	4.16162	23.9921	22.307	15.4007	20.3369	17.5625	2.39167	17.079	38.6761	14.9671	35.7292	24.5865	30.0774
T_39948_c0_g1	gi|959092351|ref|NP_001304638.1| wound-induced protein precursor [Glycine max] 3.5e-65	GO:0008061, chitin binding;GO:0042742, defense response to bacterium;GO:0050832, defense response to fungus	-	12.7735	19.4545	23.9794	117.088	86.4126	62.9963	92.2155	104.491	140.288	63.3084	42.9531	28.4348	52.0977	92.7113	53.4972	65.5317	45.3634	23.7056
T_39948_c0_g3	gi|351721773|ref|NP_001235941.1| uncharacterized protein LOC100526916 precursor [Glycine max] 3.0e-79	GO:0004540, ribonuclease activity;GO:0005773, vacuole;GO:0008061, chitin binding;GO:0009615, response to virus;GO:0009627, systemic acquired resistance;GO:0009651, response to salt stress;GO:0009723, response to ethylene;GO:0009817, defense response to fungus, incompatible interaction;GO:0031640, killing of cells of other organism;GO:0042742, defense response to bacterium;GO:0050832, defense resp…	-	1.70777	0.828955	0.824217	4.6346	6.30479	7.83819	2.50201	6.55784	4.29998	8.517	3.25039	2.46915	3.59747	10.3562	0.773391	6.82863	14.5131	13.5505
T_39948_c1_g1	gi|955333303|ref|XP_014633986.1| PREDICTED: LOW QUALITY PROTEIN: uncharacterized protein LOC100788538 [Glycine max] 1.3e-283	-	-	8.31567	5.4771	4.91603	4.50944	1.71247	4.35006	4.01293	3.66233	3.73385	2.38009	4.8797	2.6556	3.67385	2.03281	3.34421	1.94642	2.42524	3.04329
T_39948_c3_g1	gi|571467453|ref|XP_006583948.1| PREDICTED: glucosidase 2 subunit beta-like [Glycine max] 1.4e-276	GO:0005783, endoplasmic reticulum;GO:0006491, N-glycan processing;GO:0042742, defense response to bacterium	K08288-ko04141 Protein processing in endoplasmic reticulum	19.5439	14.5996	10.3303	5.87429	5.10596	10.0264	5.07132	5.9705	7.37586	4.14997	5.1625	6.12768	6.61847	6.18734	5.12727	6.41755	7.65602	11.6649
T_39952_c0_g1	gi|734372716|gb|KHN19913.1| Protein FAM210B [Glycine soja] 5.5e-50	GO:0016021, integral component of membrane	-	13.5577	8.49574	5.65135	3.83972	4.46059	4.8412	8.26354	7.62203	3.60211	4.47422	5.84365	3.04104	3.31904	2.9585	4.113	5.45607	6.03322	11.1266
T_39953_c0_g4	gi|950932223|ref|XP_014509028.1| PREDICTED: multiprotein-bridging factor 1c [Vigna radiata var. radiata] 1.5e-65	GO:0003700, DNA binding transcription factor activity;GO:0003713, transcription coactivator activity;GO:0005730, nucleolus;GO:0005737, cytoplasm;GO:0006351, transcription, DNA-templated;GO:0009408, response to heat;GO:0009414, response to water deprivation;GO:0009737, response to abscisic acid;GO:0009873, ethylene-activated signaling pathway;GO:0043565, sequence-specific DNA binding;GO:0045893, p…	-	13.8228	21.8797	21.6789	4.22981	6.16704	5.46314	9.75684	8.43757	7.0196	9.27337	10.7698	9.28796	13.606	25.0932	9.97441	20.4773	34.4049	39.3972
T_39956_c0_g2	gi|593213171|ref|XP_007132527.1| hypothetical protein PHAVU_011G101900g [Phaseolus vulgaris] 1.2e-141	GO:0003700, DNA binding transcription factor activity;GO:0005634, nucleus;GO:0006351, transcription, DNA-templated;GO:0009873, ethylene-activated signaling pathway;GO:0010200, response to chitin;GO:0016036, cellular response to phosphate starvation;GO:0043565, sequence-specific DNA binding;GO:0044212, transcription regulatory region DNA binding;GO:0045892, negative regulation of transcription, DN…	-	1.47504	2.03652	4.89605	2.89993	1.69775	1.21236	6.15186	3.8318	4.38743	4.6611	3.16519	0.936301	2.92347	2.74029	2.03047	12.6297	12.879	5.90812
T_39957_c0_g1	gi|593329751|ref|XP_007138302.1| hypothetical protein PHAVU_009G197100g [Phaseolus vulgaris] 8.2e-175	GO:0004601, peroxidase activity;GO:0005576, extracellular region;GO:0006979, response to oxidative stress;GO:0009505, plant-type cell wall;GO:0020037, heme binding;GO:0042744, hydrogen peroxide catabolic process;GO:0046872, metal ion binding	K00430-ko00940 Phenylpropanoid biosynthesis	135.503	111.196	111.627	14.2305	25.3569	43.4926	48.7538	38.2702	52.2795	25.4024	80.4638	104.146	121.404	71.3397	188.317	19.9167	90.9434	131.163
T_39957_c0_g2	gi|356536743|ref|XP_003536895.1| PREDICTED: peroxidase 3-like [Glycine max] 1.3e-94	GO:0004601, peroxidase activity;GO:0005576, extracellular region;GO:0005783, endoplasmic reticulum;GO:0006979, response to oxidative stress;GO:0009269, response to desiccation;GO:0009409, response to cold;GO:0009505, plant-type cell wall;GO:0009664, plant-type cell wall organization;GO:0020037, heme binding;GO:0042538, hyperosmotic salinity response;GO:0042744, hydrogen peroxide catabolic process…	K00430-ko00940 Phenylpropanoid biosynthesis	1.37105	0.711755	5.83832	38.3799	59.9624	38.4778	9.34375	13.8345	64.8297	22.198	4.75414	3.08917	31.4828	14.914	12.0628	7.28431	17.904	13.5717
T_39959_c1_g2	gi|1029089552|ref|XP_016704852.1| PREDICTED: polyubiquitin-like [Gossypium hirsutum] 1.5e-19	GO:0005634, nucleus;GO:0005737, cytoplasm;GO:0016021, integral component of membrane	-	183.414	206.263	158.636	94.907	77.6265	92.7942	96.2286	111.984	41.6104	87.4177	76.7338	77.0769	97.335	106.072	88.9427	155.953	161.683	239.64
T_39959_c2_g5	gi|326503930|dbj|BAK02751.1| predicted protein [Hordeum vulgare subsp. vulgare] 8.3e-27	GO:0003735, structural constituent of ribosome;GO:0005634, nucleus;GO:0005840, ribosome;GO:0006412, translation;GO:0046872, metal ion binding	-	14.5006	0.876269	3.59664	4.94004	0	0	0	0.514672	0	2.08959	3.35366	0.503687	0	0	0	0	0.994557	0
T_39960_c5_g2	gi|356555664|ref|XP_003546150.1| PREDICTED: uncharacterized protein LOC100796798 [Glycine max] 8.6e-87	-	-	16.9414	14.5583	10.7918	22.6952	38.0769	33.7814	34.4572	29.3471	30.9446	41.801	42.5726	31.4431	46.3842	43.6574	73.0178	37.2234	17.3911	22.0066
T_39960_c6_g3	-	-	-	26.4955	16.4779	9.7942	10.5537	7.6163	11.5913	8.65813	9.55221	3.87385	4.2441	5.64647	6.85148	7.40106	7.32176	6.69802	14.0363	11.1141	27.9814
T_39966_c0_g6	gi|571492691|ref|XP_006592314.1| PREDICTED: cytochrome P450 94C1 [Glycine max] 5.5e-261	GO:0004497, monooxygenase activity;GO:0005506, iron ion binding;GO:0009611, response to wounding;GO:0016021, integral component of membrane;GO:0016705, oxidoreductase activity, acting on paired donors, with incorporation or reduction of molecular oxygen;GO:0018685, alkane 1-monooxygenase activity;GO:0020037, heme binding;GO:0043231, intracellular membrane-bounded organelle	-	15.854	41.5028	131.134	10.0334	32.5268	6.79968	144.606	43.3204	185.102	114.751	195.685	27.0896	79.0012	49.4882	128.11	564.563	426.176	271.977
T_39967_c0_g2	gi|571553537|ref|XP_006603842.1| PREDICTED: ABC transporter B family member 15-like isoform X2 [Glycine max] 4.4e-273	GO:0005524, ATP binding;GO:0005886, plasma membrane;GO:0016021, integral component of membrane;GO:0042626, ATPase activity, coupled to transmembrane movement of substances;GO:0055085, transmembrane transport	-	45.318	32.027	20.0734	2.63747	2.67124	10.2827	10.2299	7.52359	3.91766	3.30302	11.4446	9.20405	8.96174	4.39658	14.8192	4.10308	6.96853	18.2416
T_39970_c1_g7	gi|955303513|ref|XP_014631493.1| PREDICTED: probable galacturonosyltransferase-like 2 [Glycine max] 1.6e-162	GO:0000139, Golgi membrane;GO:0000271, polysaccharide biosynthetic process;GO:0005794, Golgi apparatus;GO:0016021, integral component of membrane;GO:0016757, transferase activity, transferring glycosyl groups;GO:0045489, pectin biosynthetic process;GO:0047262, polygalacturonate 4-alpha-galacturonosyltransferase activity;GO:0071555, cell wall organization	-	3.64155	5.471	4.96632	7.3416	9.01094	9.55478	5.48059	3.69699	12.2761	5.391	7.09449	13.8307	8.83299	8.68732	10.6432	5.08376	6.23662	6.23779
T_39973_c0_g1	-	-	-	3.99591	5.44751	4.92959	7.86614	6.94397	6.82649	10.1779	5.66305	7.75065	7.69742	5.42639	12.6267	7.83898	15.5348	8.80716	4.81674	5.81862	7.12163
T_39978_c0_g1	gi|1012333064|gb|KYP44471.1| Endochitinase CH5B [Cajanus cajan] 2.0e-140	GO:0000272, polysaccharide catabolic process;GO:0004568, chitinase activity;GO:0005773, vacuole;GO:0005975, carbohydrate metabolic process;GO:0006032, chitin catabolic process;GO:0006952, defense response;GO:0008061, chitin binding;GO:0016998, cell wall macromolecule catabolic process	K20547-ko04016 MAPK signaling pathway - plant;ko00520 Amino sugar and nucleotide sugar metabolism	93.0211	133.834	122.948	417.123	445.151	263.104	224.592	251.434	318.663	220.395	132.042	107.114	193.233	302.151	123.781	161.803	201.409	104.494
T_39980_c1_g1	gi|947121680|gb|KRH69886.1| hypothetical protein GLYMA_02G055000 [Glycine max] 2.0e-54	-	-	32.0561	32.5019	32.5521	5.65984	13.7897	4.7092	47.418	29.4895	25.9351	31.6203	41.3258	4.67494	21.5104	15.047	24.172	163.091	95.5775	132.047
T_39981_c2_g1	gi|1012325293|gb|KYP37204.1| putative polyamine oxidase 2 [Cajanus cajan] 1.0e-14	GO:0005777, peroxisome;GO:0006598, polyamine catabolic process;GO:0016491, oxidoreductase activity;GO:0046208, spermine catabolic process;GO:0046592, polyamine oxidase activity;GO:0052901, spermine:oxygen oxidoreductase (spermidine-forming) activity;GO:0052902, spermidine:oxygen oxidoreductase (3-aminopropanal-forming) activity;GO:0052903, N1-acetylspermine:oxygen oxidoreductase (3-acetamidopropa…	-	4.31238	5.088	8.33298	0.289259	0.725337	1.01351	5.41649	1.6127	1.66208	2.95627	4.45426	4.32148	4.21259	0.47586	2.56655	6.47569	8.51932	5.07548
T_39981_c4_g2	gi|356521817|ref|XP_003529547.1| PREDICTED: WD repeat-containing protein 43-like [Glycine max] 2.7e-284	GO:0000003, reproduction;GO:0000132, establishment of mitotic spindle orientation;GO:0000776, kinetochore;GO:0001650, fibrillar center;GO:0005654, nucleoplasm;GO:0005730, nucleolus;GO:0005813, centrosome;GO:0005874, microtubule;GO:0005875, microtubule associated complex;GO:0005938, cell cortex;GO:0006364, rRNA processing;GO:0007097, nuclear migration;GO:0008017, microtubule binding;GO:0031023, mi…	K14546-ko03008 Ribosome biogenesis in eukaryotes	12.9814	9.90664	7.72452	4.47261	7.11025	8.85984	6.60319	8.77434	3.56207	4.22937	6.51409	4.5445	5.25171	2.99866	6.51362	4.54545	6.46733	6.21903
T_39986_c0_g1	gi|571455633|ref|XP_003524182.2| PREDICTED: subtilisin-like protease SBT3.3 isoform X1 [Glycine max] 2.3e-177	GO:0004252, serine-type endopeptidase activity;GO:0005576, extracellular region;GO:0005618, cell wall	-	12.8264	11.4108	7.1046	4.89568	2.83988	6.57785	9.34734	8.74284	2.50633	4.30789	4.61451	5.17285	3.12254	2.33452	4.03573	3.17279	3.45146	7.7674
T_39987_c0_g1	gi|358248224|ref|NP_001239842.1| uncharacterized protein LOC100782376 [Glycine max] 7.7e-119	GO:0000408, EKC/KEOPS complex;GO:0002039, p53 binding;GO:0004674, protein serine/threonine kinase activity;GO:0005524, ATP binding;GO:0005634, nucleus;GO:0005654, nucleoplasm;GO:0005829, cytosol;GO:0006468, protein phosphorylation;GO:0008033, tRNA processing;GO:0016020, membrane;GO:0016787, hydrolase activity;GO:0070525, tRNA threonylcarbamoyladenosine metabolic process;GO:1901796, regulation of …	-	50.2558	43.0463	36.4003	17.8468	22.7701	30.1546	38.2721	33.1577	19.5259	17.92	24.7106	19.5596	21.889	20.0885	20.5388	27.0535	25.0154	38.6895
T_39989_c2_g2	gi|571515381|ref|XP_003547047.2| PREDICTED: uncharacterized protein LOC100798931 [Glycine max] 1.7e-224	-	-	2.2849	1.9256	2.67889	3.08609	3.12267	1.78035	4.57614	4.1515	4.28705	5.36628	6.26306	2.24993	2.76011	4.45224	3.0935	7.00008	5.41998	4.25291
T_39995_c1_g1	gi|351734486|ref|NP_001236307.1| uncharacterized protein LOC100306271 precursor [Glycine max] 2.2e-09	GO:0005576, extracellular region;GO:0008283, cell proliferation	-	70.1887	31.8321	20.8429	5.15995	8.32504	18.4607	8.24135	7.73364	7.11989	8.26739	16.1951	19.1037	22.7189	12.1867	35.107	7.67096	30.4019	44.0968
T_39995_c2_g3	gi|571470640|ref|XP_006585075.1| PREDICTED: probable serine/threonine-protein kinase At1g18390 isoform X2 [Glycine max] 3.5e-298	GO:0004674, protein serine/threonine kinase activity;GO:0005524, ATP binding;GO:0005886, plasma membrane;GO:0007166, cell surface receptor signaling pathway;GO:0016021, integral component of membrane;GO:0030247, polysaccharide binding;GO:0042631, cellular response to water deprivation;GO:0048573, photoperiodism, flowering;GO:0071215, cellular response to abscisic acid stimulus	-	1.83728	2.98073	2.39915	3.49717	3.78661	5.11891	3.38793	4.55945	3.34882	4.95724	4.54155	1.78334	4.90234	6.56811	4.71695	7.19813	9.564	9.03787
T_39996_c0_g1	gi|356571461|ref|XP_003553895.1| PREDICTED: F-box protein CPR30-like [Glycine max] 1.4e-224	GO:0004842, ubiquitin-protein transferase activity;GO:0005634, nucleus;GO:0005737, cytoplasm;GO:0009626, plant-type hypersensitive response;GO:0019005, SCF ubiquitin ligase complex;GO:0031146, SCF-dependent proteasomal ubiquitin-dependent protein catabolic process;GO:0031348, negative regulation of defense response;GO:0042177, negative regulation of protein catabolic process	-	4.03042	6.14275	3.71325	10.5353	10.864	8.10492	7.12385	8.91963	8.202	9.31189	6.07066	5.69388	12.2977	15.5711	6.90871	8.58295	4.47215	3.38562
T_39996_c1_g2	-	-	-	19.5548	5.58784	5.43749	2.28405	0.945651	1.70973	4.50487	12.5268	0.571011	3.0231	4.24562	5.72458	3.33862	7.68135	7.25323	3.45022	2.66852	6.88192
T_39997_c1_g1	gi|951070515|ref|XP_014490777.1| PREDICTED: TMV resistance protein N-like isoform X5 [Vigna radiata var. radiata] 6.7e-26	GO:0005524, ATP binding;GO:0005737, cytoplasm;GO:0006952, defense response;GO:0007165, signal transduction;GO:0009626, plant-type hypersensitive response;GO:0043531, ADP binding	-	31.4974	28.5471	16.3818	9.29894	4.9884	19.085	11.5357	9.13247	6.32936	5.80582	6.67612	7.67071	7.51842	5.55995	7.35649	4.05758	9.59342	10.529
T_39998_c2_g2	gi|947056860|gb|KRH06266.1| hypothetical protein GLYMA_16G012600 [Glycine max] 1.2e-11	GO:0001666, response to hypoxia;GO:0003677, DNA binding;GO:0003700, DNA binding transcription factor activity;GO:0005634, nucleus;GO:0006351, transcription, DNA-templated;GO:0009873, ethylene-activated signaling pathway;GO:0010468, regulation of gene expression	-	1.38113	1.78499	1.84569	2.45221	1.23918	1.24805	6.17285	3.34607	2.08898	6.37243	10.8245	1.26628	3.65265	2.31123	6.24159	2.43219	2.23528	2.48327
T_40000_c2_g1	gi|356542453|ref|XP_003539681.1| PREDICTED: dof zinc finger protein DOF3.6 [Glycine max] 3.7e-101	GO:0003677, DNA binding;GO:0005634, nucleus;GO:0006351, transcription, DNA-templated;GO:0006355, regulation of transcription, DNA-templated;GO:0046872, metal ion binding	-	35.4173	25.0473	20.9724	16.171	10.4065	15.5526	19.1544	18.9884	11.1416	12.915	14.3809	14.2351	10.852	9.89953	14.912	13.2437	18.8518	18.4096
T_40001_c1_g5	gi|358249334|ref|NP_001240035.1| uncharacterized protein LOC100806219 [Glycine max] 6.7e-37	-	-	70.6012	61.023	67.0344	80.509	67.9234	57.5622	102.252	140.133	63.4627	132.031	73.656	55.3212	118.49	132.036	87.93	209.23	152.128	144.7
T_40005_c1_g2	gi|955353044|ref|XP_014620021.1| PREDICTED: THO complex subunit 4A [Glycine max] 3.6e-34	GO:0000166, nucleotide binding;GO:0003676, nucleic acid binding;GO:0003723, RNA binding;GO:0005654, nucleoplasm;GO:0005730, nucleolus;GO:0051028, mRNA transport	K12881-ko03040 Spliceosome;ko03015 mRNA surveillance pathway;ko03013 RNA transport	76.3088	68.4828	65.1019	90.7956	63.6221	63.1373	93.1361	112.373	78.6538	125.791	123.069	86.3513	120.617	159.493	199.29	189.354	126.059	100.618
T_40008_c1_g1	gi|356559039|ref|XP_003547809.1| PREDICTED: E3 ubiquitin-protein ligase complex SLX5-SLX8 subunit SLX8-like [Glycine max] 3.9e-84	GO:0008270, zinc ion binding	-	3.78491	3.15492	4.50102	4.4159	6.31743	4.89595	5.82803	6.26926	6.44964	6.27821	3.92789	6.35517	6.04908	11.657	6.73118	4.25855	4.26929	4.19407
T_40012_c0_g2	gi|955311047|ref|XP_003522086.2| PREDICTED: uncharacterized protein LOC100799020 [Glycine max] 2.2e-29	-	-	0.679053	0.172192	1.52305	7.32335	9.56998	9.03923	8.33629	11.74	17.475	12.6719	5.42825	2.09771	10.7104	6.12904	8.91981	7.31685	8.38604	5.77741
T_40014_c0_g1	gi|356536216|ref|XP_003536635.1| PREDICTED: uncharacterized protein LOC100789837 [Glycine max] 1.9e-53	GO:0016021, integral component of membrane	-	5.61397	6.25241	5.76607	0.341009	2.51073	0.813552	2.07293	1.8342	0.996476	2.32273	4.58487	0.761429	2.17145	1.21298	1.48528	3.25293	6.78395	6.73457
T_40017_c0_g3	gi|955377628|ref|XP_014624803.1| PREDICTED: uncharacterized protein LOC100801977 isoform X1 [Glycine max] 3.5e-176	GO:0005975, carbohydrate metabolic process;GO:0016853, isomerase activity;GO:0030246, carbohydrate binding;GO:0047938, glucose-6-phosphate 1-epimerase activity	K01792-ko00010 Glycolysis / Gluconeogenesis	20.8226	19.0184	17.5871	7.39826	15.3588	17.5718	11.7364	10.9425	8.09217	7.41668	9.90877	11.7386	9.70352	6.32975	8.5214	8.80187	10.7144	14.5091
T_40019_c0_g2	gi|356515894|ref|XP_003526632.1| PREDICTED: uncharacterized protein At4g08330, chloroplastic-like [Glycine max] 1.7e-45	GO:0005886, plasma membrane;GO:0009507, chloroplast	-	23.5747	20.1445	24.1608	7.85282	6.68061	5.44196	11.8102	10.1395	8.73372	10.3836	16.3342	11.4731	9.85932	15.8151	8.32673	22.2253	21.6617	26.6803
T_40023_c1_g1	gi|356530559|ref|XP_003533848.1| PREDICTED: putative uncharacterized protein DDB_G0270496 [Glycine max] 1.1e-172	GO:0003700, DNA binding transcription factor activity;GO:0005634, nucleus;GO:0005730, nucleolus;GO:0005737, cytoplasm;GO:0005794, Golgi apparatus;GO:0005813, centrosome;GO:0005829, cytosol;GO:0005925, focal adhesion;GO:0006357, regulation of transcription by RNA polymerase II;GO:0006974, cellular response to DNA damage stimulus;GO:0007155, cell adhesion;GO:0007346, regulation of mitotic cell cycl…	-	13.1878	8.80586	6.64387	3.70452	5.93113	9.75878	6.96359	6.41609	4.7979	3.5347	4.80778	4.0058	3.15712	3.11398	4.39396	3.2622	4.21579	7.67123
T_40030_c0_g1	gi|571570319|ref|XP_006606532.1| PREDICTED: 26S protease regulatory subunit 6A homolog [Glycine max] 5.2e-154	GO:0000502, proteasome complex;GO:0005524, ATP binding;GO:0005634, nucleus;GO:0005737, cytoplasm;GO:0005829, cytosol;GO:0009553, embryo sac development;GO:0009555, pollen development;GO:0010498, proteasomal protein catabolic process;GO:0016787, hydrolase activity;GO:0017025, TBP-class protein binding;GO:0030163, protein catabolic process;GO:0030433, ubiquitin-dependent ERAD pathway;GO:0031595, nu…	-	113.271	58.2546	51.7452	32.4442	39.0216	46.1752	39.676	37.3909	24.9773	20.8457	26.3251	21.1807	22.4347	20.8698	27.4598	26.8702	34.4244	42.8375
T_40034_c1_g1	gi|965670530|dbj|BAT85137.1| hypothetical protein VIGAN_04263900 [Vigna angularis var. angularis] 1.5e-193	GO:0005634, nucleus;GO:0005737, cytoplasm;GO:0009864, induced systemic resistance, jasmonic acid mediated signaling pathway;GO:0009944, polarity specification of adaxial/abaxial axis;GO:0009954, proximal/distal pattern formation;GO:0010227, floral organ abscission;GO:0010254, nectary development;GO:0010434, bract formation;GO:0010582, floral meristem determinacy;GO:0016567, protein ubiquitination…	K14508-ko04075 Plant hormone signal transduction	2.57968	2.63906	2.48868	5.89365	5.58663	3.91965	5.13958	5.22214	5.84978	5.11398	9.94149	4.66113	5.88164	4.53164	11.8223	7.07982	2.80933	2.70706
T_40035_c2_g1	gi|356539818|ref|XP_003538390.1| PREDICTED: aspartic proteinase PCS1-like [Glycine max] 1.7e-225	GO:0004190, aspartic-type endopeptidase activity;GO:0005783, endoplasmic reticulum;GO:0006508, proteolysis;GO:0008233, peptidase activity;GO:0012501, programmed cell death;GO:0030163, protein catabolic process	-	31.4865	73.6361	153.899	15.6797	23.1764	11.8806	111.471	63.072	46.1555	69.8913	90.5945	43.5536	61.6188	54.4281	78.9078	155.057	146.131	88.9138
T_40036_c1_g4	gi|356547501|ref|XP_003542150.1| PREDICTED: probable xyloglucan endotransglucosylase/hydrolase protein 23 [Glycine max] 3.1e-43	GO:0004553, hydrolase activity, hydrolyzing O-glycosyl compounds;GO:0005618, cell wall;GO:0005794, Golgi apparatus;GO:0010411, xyloglucan metabolic process;GO:0016762, xyloglucan:xyloglucosyl transferase activity;GO:0042546, cell wall biogenesis;GO:0048046, apoplast;GO:0071555, cell wall organization	-	4.88255	5.25482	13.5182	2.43343	2.0172	1.5875	1.05829	1.27937	2.34689	2.21689	1.66105	2.23302	2.23309	0.408829	2.01027	2.94689	6.8054	8.34457
T_40037_c0_g1	gi|571537974|ref|XP_006601085.1| PREDICTED: GRIP and coiled-coil domain-containing protein 2-like isoform X4 [Glycine max] 0.0e+00	GO:0016021, integral component of membrane	-	17.3873	8.64981	4.70153	2.62054	1.83883	4.41327	3.60549	3.53625	1.88844	1.26639	2.82733	2.40265	4.41585	3.44073	3.87404	6.02345	4.28618	11.9966
T_40038_c1_g1	gi|1012338731|gb|KYP49978.1| Uridylate kinase, partial [Cajanus cajan] 4.9e-58	GO:0004127, cytidylate kinase activity;GO:0005524, ATP binding;GO:0005634, nucleus;GO:0005737, cytoplasm;GO:0006207, 'de novo' pyrimidine nucleobase biosynthetic process;GO:0006221, pyrimidine nucleotide biosynthetic process;GO:0009041, uridylate kinase activity	-	10.419	9.41745	5.57586	3.43242	2.00861	4.32085	6.48199	4.56658	3.66887	2.57454	4.28232	2.12182	3.87267	4.097	3.79157	4.67255	4.39157	7.22727
T_40040_c0_g1	gi|571495002|ref|XP_006593009.1| PREDICTED: TMV resistance protein N-like isoform X1 [Glycine max] 2.8e-65	GO:0005524, ATP binding;GO:0005737, cytoplasm;GO:0006952, defense response;GO:0007165, signal transduction;GO:0009626, plant-type hypersensitive response;GO:0043531, ADP binding	-	16.34	6.44284	4.95241	1.61364	1.73678	2.66979	2.72811	5.51592	3.50631	2.0755	4.02895	1.68821	1.24472	1.6002	2.2173	3.66579	4.42647	6.79069
T_40042_c1_g1	gi|593262428|ref|XP_007133393.1| hypothetical protein PHAVU_011G175200g [Phaseolus vulgaris] 7.1e-162	GO:0004672, protein kinase activity;GO:0004674, protein serine/threonine kinase activity;GO:0005516, calmodulin binding;GO:0005524, ATP binding;GO:0005886, plasma membrane;GO:0009620, response to fungus;GO:0016021, integral component of membrane;GO:0030246, carbohydrate binding;GO:0045087, innate immune response	-	9.73448	7.28603	3.78718	0.815349	1.67702	1.09278	3.29099	2.30185	1.12323	0.940506	1.94357	1.11979	2.07908	2.49191	1.58508	0.606726	0.66445	2.94186
T_40042_c1_g2	gi|955335389|ref|XP_014634406.1| PREDICTED: G-type lectin S-receptor-like serine/threonine-protein kinase CES101 isoform X2 [Glycine max] 2.9e-51	GO:0004674, protein serine/threonine kinase activity;GO:0005516, calmodulin binding;GO:0005524, ATP binding;GO:0005886, plasma membrane;GO:0006468, protein phosphorylation;GO:0006952, defense response;GO:0009506, plasmodesma;GO:0009620, response to fungus;GO:0016021, integral component of membrane;GO:0030246, carbohydrate binding;GO:0045087, innate immune response	-	37.7521	9.3201	8.90789	0.605207	0.805823	2.59141	3.15518	12.8254	0.605904	3.31731	8.31082	2.14648	0.199647	5.84424	6.94183	1.98762	3.55186	0.740992
T_40048_c0_g1	gi|734312171|gb|KHN00349.1| U-box domain-containing protein 19 [Glycine soja] 0.0e+00	GO:0004842, ubiquitin-protein transferase activity;GO:0005634, nucleus;GO:0005737, cytoplasm;GO:0010029, regulation of seed germination;GO:0016874, ligase activity	-	2.79523	7.8961	6.0381	0.799793	4.41319	1.92877	7.36458	5.22383	5.67694	9.77555	13.9555	6.30363	6.94109	6.7096	2.38836	10.211	16.3301	10.7365
T_40052_c0_g1	gi|955385927|ref|XP_014626697.1| PREDICTED: uncharacterized protein LOC102660528 isoform X1 [Glycine max] 3.2e-61	GO:0016021, integral component of membrane	-	5.15375	4.39056	10.6159	0.677651	0.76323	1.10482	4.53904	1.67726	1.82095	0.888159	2.41166	1.029	1.59958	1.34774	1.13888	6.60001	7.90737	11.6545
T_40057_c5_g2	gi|356509743|ref|XP_003523605.1| PREDICTED: uncharacterized protein LOC100816633 [Glycine max] 4.1e-201	GO:0016021, integral component of membrane	-	19.6403	13.0947	5.87201	1.63565	2.56407	7.21312	2.29008	1.12154	3.18653	0.650324	3.40935	4.24587	4.24638	0.977536	4.01621	1.99731	4.71635	9.04343
T_40058_c0_g1	gi|351723463|ref|NP_001236000.1| uncharacterized protein LOC100526920 [Glycine max] 5.9e-14	-	-	12.3798	11.9852	7.07149	2.6654	1.49377	5.07403	5.50039	5.67717	3.18677	3.61787	4.29594	6.18865	4.81493	5.68965	4.49807	2.52577	3.07039	8.23883
T_40059_c1_g3	gi|947061433|gb|KRH10694.1| hypothetical protein GLYMA_15G063700 [Glycine max] 1.4e-37	GO:0016021, integral component of membrane	-	37.3053	55.2077	96.8439	21.6158	33.4029	26.8569	55.3573	46.0435	32.9658	38.4756	36.7246	30.5608	37.7779	38.6941	43.7865	48.1269	38.9422	60.2471
T_40061_c0_g4	gi|351722611|ref|NP_001236994.1| uncharacterized LOC100527249 precursor [Glycine max] 4.9e-29	GO:0005576, extracellular region;GO:0005618, cell wall;GO:0030145, manganese ion binding;GO:0033609, oxalate metabolic process;GO:0045735, nutrient reservoir activity;GO:0046564, oxalate decarboxylase activity;GO:0048046, apoplast	-	0.412351	0.8293	0.628496	118.244	112.949	28.2476	45.2675	46.3391	310.129	67.2628	8.63805	0.354803	114.835	57.0501	65.4241	50.8118	101.419	120.228
T_40064_c0_g1	gi|734315597|gb|KHN01979.1| hypothetical protein glysoja_034501 [Glycine soja] 5.8e-82	-	-	23.7687	20.4775	15.5218	7.95268	14.764	21.4527	12.7805	11.1419	8.74	8.94033	8.70217	11.2881	9.50485	7.20236	9.51234	11.5235	12.6467	17.4767
T_40064_c0_g2	gi|351726688|ref|NP_001236879.1| uncharacterized protein LOC100305545 precursor [Glycine max] 4.1e-51	GO:0005773, vacuole;GO:0005886, plasma membrane;GO:0006979, response to oxidative stress;GO:0009055, electron transfer activity;GO:0009646, response to absence of light;GO:0015690, aluminum cation transport;GO:0031225, anchored component of membrane;GO:0046658, anchored component of plasma membrane;GO:0046872, metal ion binding;GO:0050832, defense response to fungus;GO:0055114, oxidation-reductio…	-	1.42871	5.38465	2.13608	1.13568	2.81793	0.494728	8.80856	2.23694	3.66664	4.20272	7.4123	2.42864	2.72872	3.74147	2.71602	16.2548	12.5363	11.44
T_40064_c1_g2	gi|1012344782|gb|KYP55974.1| putative glutathione S-transferase [Cajanus cajan] 8.0e-105	GO:0004364, glutathione transferase activity;GO:0005737, cytoplasm;GO:0006749, glutathione metabolic process;GO:0009407, toxin catabolic process	K00799-ko00480 Glutathione metabolism;ko00980 Metabolism of xenobiotics by cytochrome P450;ko00982 Drug metabolism - cytochrome P450	0.720285	0.047051	0.169522	1.32734	0.866218	0.376313	1.2694	1.92406	0.276206	2.45409	0.738174	0.190131	1.40043	5.87541	1.90032	9.50929	3.59093	3.89204
T_40067_c2_g1	gi|571570250|ref|XP_006606514.1| PREDICTED: kinesin-4-like [Glycine max] 0.0e+00	GO:0003777, microtubule motor activity;GO:0005524, ATP binding;GO:0005737, cytoplasm;GO:0005871, kinesin complex;GO:0005874, microtubule;GO:0007018, microtubule-based movement;GO:0008017, microtubule binding;GO:0016887, ATPase activity	-	6.24268	5.37618	3.68027	2.22311	2.42657	6.94152	1.84653	1.51326	1.99405	1.14393	1.65632	3.08796	1.95038	0.874299	2.00457	0.742315	2.70771	3.04769
T_40074_c1_g3	gi|356556886|ref|XP_003546751.1| PREDICTED: cytochrome P450 CYP72A219-like [Glycine max] 3.2e-12	GO:0004497, monooxygenase activity;GO:0005506, iron ion binding;GO:0016021, integral component of membrane;GO:0016705, oxidoreductase activity, acting on paired donors, with incorporation or reduction of molecular oxygen;GO:0020037, heme binding	-	42.1735	15.0176	9.8656	2.45351	3.91309	2.62194	6.13369	9.90067	4.03622	4.67826	14.199	7.61953	5.4548	5.70469	10.074	12.5068	10.2929	15.3751
T_40080_c2_g1	gi|734363083|gb|KHN16352.1| Chloroplastic group IIA intron splicing facilitator CRS1, chloroplastic [Glycine soja] 1.7e-237	GO:0000372, Group I intron splicing;GO:0000373, Group II intron splicing;GO:0003723, RNA binding;GO:0006397, mRNA processing;GO:0009570, chloroplast stroma	-	11.025	6.03766	4.55978	2.68103	1.49926	3.19774	3.34583	3.42664	2.44703	3.15472	3.66092	2.79015	2.07128	3.0869	2.10731	2.5742	2.3705	3.81651
T_40080_c3_g3	gi|351725843|ref|NP_001238642.1| cold-regulated protein [Glycine max] 1.1e-76	GO:0005789, endoplasmic reticulum membrane;GO:0005886, plasma membrane;GO:0016021, integral component of membrane;GO:0032586, protein storage vacuole membrane	-	112.182	194.491	278.817	27.2328	76.8224	36.8675	314.882	225.996	170.199	295.558	319.643	119.504	213.163	232.51	231.209	596.6	399.606	326.905
T_40088_c1_g1	gi|571496381|ref|XP_006593592.1| PREDICTED: WAT1-related protein At1g44800 [Glycine max] 1.2e-137	GO:0005886, plasma membrane;GO:0015171, amino acid transmembrane transporter activity;GO:0016021, integral component of membrane;GO:0022857, transmembrane transporter activity;GO:0032973, amino acid export across plasma membrane;GO:0043090, amino acid import;GO:0080144, amino acid homeostasis	-	160.711	159.929	138.772	13.05	33.111	61.6245	24.8929	23.7987	47.0997	30.262	67.4969	117.076	159.369	64.4887	295.368	28.0651	122.467	106.107
T_40094_c3_g2	gi|734419427|gb|KHN40123.1| hypothetical protein glysoja_028744 [Glycine soja] 1.8e-25	-	-	16.5639	8.77377	8.2823	3.78044	4.84106	6.66628	5.42141	4.90279	4.69407	3.19259	4.67161	4.41232	5.06304	2.81364	2.19647	2.72018	5.84154	7.68457
T_40094_c3_g3	gi|951004770|ref|XP_014507955.1| PREDICTED: cell wall / vacuolar inhibitor of fructosidase 1-like [Vigna radiata var. radiata] 5.4e-69	GO:0004857, enzyme inhibitor activity;GO:0005618, cell wall;GO:0005773, vacuole;GO:0043086, negative regulation of catalytic activity	-	75.4092	91.8204	81.9558	433.983	330.081	238.658	194.445	282.327	165.908	356.779	74.868	116.787	147.781	137.094	150.997	133.555	99.6186	132.211
T_40097_c0_g3	gi|920696373|gb|KOM39598.1| hypothetical protein LR48_Vigan03g298000 [Vigna angularis] 1.6e-216	GO:0005524, ATP binding;GO:0005634, nucleus;GO:0006351, transcription, DNA-templated;GO:0006355, regulation of transcription, DNA-templated;GO:0019538, protein metabolic process	-	46.0279	71.3144	38.693	100.783	116.265	114.667	57.1281	93.596	75.194	125.654	149.448	133.766	49.5624	102.015	74.8287	57.5609	23.6985	31.0847
T_40098_c0_g1	gi|356544700|ref|XP_003540785.1| PREDICTED: arogenate dehydratase/prephenate dehydratase 6, chloroplastic-like [Glycine max] 1.5e-115	GO:0004664, prephenate dehydratase activity;GO:0009094, L-phenylalanine biosynthetic process;GO:0009507, chloroplast;GO:0009570, chloroplast stroma;GO:0016597, amino acid binding;GO:0047769, arogenate dehydratase activity	-	7.02968	10.5445	9.72796	11.7155	15.7273	13.12	15.9437	11.7423	22.5131	19.6677	23.1624	19.1538	20.104	18.5128	21.7574	19.5613	19.3417	15.1883
T_40098_c0_g3	gi|356543548|ref|XP_003540222.1| PREDICTED: arogenate dehydratase/prephenate dehydratase 6, chloroplastic-like [Glycine max] 8.1e-224	GO:0004664, prephenate dehydratase activity;GO:0009094, L-phenylalanine biosynthetic process;GO:0009507, chloroplast;GO:0009570, chloroplast stroma;GO:0016597, amino acid binding;GO:0047769, arogenate dehydratase activity	K05359-ko01230 Biosynthesis of amino acids;ko00400 Phenylalanine, tyrosine and tryptophan biosynthesis	41.3304	78.1147	89.8173	48.2298	61.2281	41.7631	162.251	100.468	124.008	146.618	163.604	64.6788	107.196	106.662	151.702	283.217	199.157	164.868
T_40105_c2_g6	gi|351721075|ref|NP_001238477.1| NAK-type protein kinase [Glycine max] 1.4e-104	GO:0004674, protein serine/threonine kinase activity;GO:0005524, ATP binding;GO:0005886, plasma membrane	-	5.39242	6.24507	10.3371	1.23013	1.02033	1.07707	10.4701	5.43233	2.59941	3.5465	6.3011	1.15981	1.94927	1.99934	2.16554	12.6559	11.2431	14.5979
T_40108_c0_g1	gi|356519790|ref|XP_003528552.1| PREDICTED: putative receptor-like protein kinase At1g72540 [Glycine max] 5.9e-58	GO:0004674, protein serine/threonine kinase activity;GO:0005524, ATP binding	-	1.68177	2.65249	1.11804	2.10323	2.52071	1.06344	3.21994	3.3471	1.89512	6.27374	3.13134	0.439257	4.34537	5.00591	1.44462	8.99574	4.9795	6.84934
T_40108_c0_g2	gi|356519790|ref|XP_003528552.1| PREDICTED: putative receptor-like protein kinase At1g72540 [Glycine max] 5.1e-147	GO:0004674, protein serine/threonine kinase activity;GO:0005524, ATP binding	-	1.20701	1.22775	1.10774	4.44128	1.63647	1.05382	2.93908	3.51801	2.0457	4.03596	2.41216	0.0517794	2.86353	6.28208	1.3489	8.7914	5.12251	3.42706
T_40108_c1_g1	gi|351723225|ref|NP_001235224.1| Avr9/Cf-9 induced kinase [Glycine max] 3.1e-88	GO:0004672, protein kinase activity;GO:0004674, protein serine/threonine kinase activity;GO:0005524, ATP binding;GO:0005886, plasma membrane	-	13.869	6.58413	6.56492	3.4049	1.67915	5.40823	6.81381	5.08203	3.97762	2.64866	4.34091	2.49008	4.20866	1.95281	3.62759	3.0358	3.15848	6.50785
T_40108_c1_g2	gi|356558419|ref|XP_003547504.1| PREDICTED: serine/threonine-protein kinase At5g01020-like [Glycine max] 1.8e-68	GO:0004672, protein kinase activity;GO:0004674, protein serine/threonine kinase activity;GO:0005524, ATP binding	-	3.75222	3.80045	7.17501	3.76638	3.52985	1.95153	11.9679	6.17239	9.97464	4.68998	10.9492	1.94203	5.03059	6.3586	7.57499	34.2955	17.1273	13.0516
T_40108_c1_g3	gi|356547940|ref|XP_003542362.1| PREDICTED: serine/threonine-protein kinase At5g01020-like [Glycine max] 1.7e-114	GO:0004672, protein kinase activity;GO:0004674, protein serine/threonine kinase activity;GO:0005524, ATP binding;GO:0005886, plasma membrane	-	7.37233	11.5579	17.2449	6.77948	6.62479	2.74434	30.7992	12.5882	16.132	19.3548	28.7532	3.99195	11.214	6.42094	14.5667	66.3045	62.2594	26.4174
T_40108_c2_g1	gi|356498130|ref|XP_003517906.1| PREDICTED: uncharacterized protein LOC100811752 [Glycine max] 4.2e-205	-	-	15.6342	27.9697	59.9669	11.708	12.3052	11.2534	40.1997	24.1735	19.9756	27.698	32.9225	16.5263	18.2309	30.3503	18.2256	104.058	83.807	43.749
T_40108_c2_g2	gi|351723999|ref|NP_001238322.1| uncharacterized protein LOC100305636 [Glycine max] 4.5e-41	GO:0005504, fatty acid binding;GO:0005783, endoplasmic reticulum;GO:0006869, lipid transport;GO:0008270, zinc ion binding;GO:0009506, plasmodesma;GO:0009862, systemic acquired resistance, salicylic acid mediated signaling pathway;GO:0043621, protein self-association;GO:0048046, apoplast	-	45.6865	73.9282	85.6164	126.435	133.953	120.156	181.785	133.169	178.047	155.457	130.834	91.3758	146.277	91.0019	134.023	91.7049	60.4671	73.8251
T_40110_c0_g1	gi|571566221|ref|XP_006605881.1| PREDICTED: transmembrane protein 45B-like [Glycine max] 2.8e-148	GO:0016021, integral component of membrane	-	51.7294	45.0206	23.1208	7.63357	16.711	28.6888	11.1214	5.98803	13.1359	3.15221	15.8512	22.9073	22.5608	5.88877	19.3934	8.50062	18.2265	28.5268
T_40112_c1_g1	gi|356502709|ref|XP_003520159.1| PREDICTED: auxin-induced protein 22B-like [Glycine max] 7.7e-59	GO:0005634, nucleus;GO:0006351, transcription, DNA-templated;GO:0006355, regulation of transcription, DNA-templated;GO:0009734, auxin-activated signaling pathway	-	60.5441	48.3026	54.8644	25.8068	36.3182	34.2371	49.3396	53.5077	18.9221	26.4854	37.6712	24.1881	32.157	21.1214	26.1696	35.0402	40.762	44.8815
T_40114_c0_g1	gi|1021521347|ref|XP_016204060.1| PREDICTED: kunitz-type trypsin inhibitor-like 2 protein [Arachis ipaensis] 1.7e-58	GO:0004866, endopeptidase inhibitor activity;GO:0004867, serine-type endopeptidase inhibitor activity;GO:0005576, extracellular region	-	42.9722	39.0114	34.0266	50.025	77.9225	43.6965	68.9584	85.4322	97.5653	32.1923	30.9156	30.1322	42.8522	51.3669	26.6675	50.1855	31.9492	34.675
T_40115_c0_g4	gi|571453903|ref|XP_003525821.2| PREDICTED: L-lactate dehydrogenase B-like [Glycine max] 6.5e-102	GO:0004459, L-lactate dehydrogenase activity;GO:0005737, cytoplasm;GO:0005975, carbohydrate metabolic process;GO:0019752, carboxylic acid metabolic process	-	18.1698	28.1237	38.8384	55.3059	55.801	48.1686	60.2966	43.0471	75.6897	82.1495	39.846	37.7441	67.4086	84.3958	46.4257	138.577	116.339	79.0097
T_40116_c2_g1	gi|593267499|ref|XP_007135927.1| hypothetical protein PHAVU_009G003800g [Phaseolus vulgaris] 2.2e-87	GO:0000977, RNA polymerase II regulatory region sequence-specific DNA binding;GO:0001085, RNA polymerase II transcription factor binding;GO:0001228, transcriptional activator activity, RNA polymerase II transcription regulatory region sequence-specific DNA binding;GO:0003682, chromatin binding;GO:0003700, DNA binding transcription factor activity;GO:0005634, nucleus;GO:0005667, transcription fact…	-	21.8064	41.8405	63.2774	19.713	21.2609	14.1882	72.856	54.8617	46.3318	56.559	73.1002	35.0633	42.064	70.0375	63.1927	111.918	78.0402	69.3857
T_40118_c1_g2	gi|301087183|gb|ADK60808.1| hypothetical protein, partial [Arachis diogoi] 1.2e-36	-	-	623.744	160.576	249.024	172.499	120.895	184.184	139.79	93.1098	107.862	155.783	165.681	317.236	451.42	121.375	184.208	114.933	178.999	166.56
T_40122_c2_g1	gi|544206129|gb|AGW16013.1| 4-coumarate:coenzyme A ligase 1 [Pueraria montana var. lobata] 4.3e-291	GO:0005524, ATP binding;GO:0008152, metabolic process;GO:0009698, phenylpropanoid metabolic process;GO:0016207, 4-coumarate-CoA ligase activity	K01904-ko00360 Phenylalanine metabolism;ko00130 Ubiquinone and other terpenoid-quinone biosynthesis;ko00940 Phenylpropanoid biosynthesis	19.1268	38.3192	37.593	103.099	60.4816	66.1703	45.2289	43.2857	76.8816	57.9274	49.6746	44.6215	64.5927	66.0876	37.5765	38.83	45.8557	40.1312
T_40122_c3_g1	gi|734424893|gb|KHN42836.1| NADH-cytochrome b5 reductase 1 [Glycine soja] 4.8e-159	GO:0004128, cytochrome-b5 reductase activity, acting on NAD(P)H;GO:0005741, mitochondrial outer membrane;GO:0005783, endoplasmic reticulum;GO:0005886, plasma membrane;GO:0009505, plant-type cell wall;GO:0016021, integral component of membrane;GO:0022900, electron transport chain;GO:0071949, FAD binding	K00326-ko00520 Amino sugar and nucleotide sugar metabolism	22.4781	18.8415	13.9156	6.94153	8.91319	13.7216	6.22798	3.69358	9.58056	4.01622	5.10422	10.0795	11.08	4.38141	5.40487	4.42135	8.33242	9.67743
T_40122_c3_g7	gi|947077402|gb|KRH26242.1| hypothetical protein GLYMA_12G162700 [Glycine max] 6.7e-30	GO:0003677, DNA binding;GO:0003700, DNA binding transcription factor activity;GO:0005634, nucleus;GO:0006351, transcription, DNA-templated;GO:0009723, response to ethylene;GO:0009737, response to abscisic acid;GO:0009864, induced systemic resistance, jasmonic acid mediated signaling pathway;GO:0009873, ethylene-activated signaling pathway;GO:0010105, negative regulation of ethylene-activated sign…	-	35.339	74.487	38.4008	10.8614	72.4741	20.2696	171.724	132.369	103.505	198.393	167.41	61.1756	103.289	182.45	151.394	154.815	76.7162	134.202
T_40124_c1_g2	gi|734310055|gb|KHM99756.1| TMV resistance protein N [Glycine soja] 4.5e-44	GO:0003676, nucleic acid binding;GO:0004526, ribonuclease P activity;GO:0006952, defense response;GO:0043531, ADP binding	-	39.6903	29.1712	20.4077	12.2115	10.4578	14.2304	20.3131	21.0968	13.6134	7.83238	14.43	6.53614	13.9148	7.41545	21.4783	12.6246	17.366	16.3644
T_40129_c0_g1	gi|734387206|gb|KHN25159.1| Cysteine-rich receptor-like protein kinase 2 [Glycine soja] 5.4e-100	GO:0004674, protein serine/threonine kinase activity;GO:0005524, ATP binding;GO:0005886, plasma membrane;GO:0006952, defense response;GO:0009506, plasmodesma;GO:0010193, response to ozone;GO:0016021, integral component of membrane;GO:0046777, protein autophosphorylation	-	1.52952	1.39026	2.28926	2.01097	2.87732	2.12313	4.45839	5.0118	6.8537	5.49632	5.8193	1.42497	4.03974	2.05211	5.4916	2.01053	3.07807	0.793246
T_40134_c2_g1	gi|950964634|ref|XP_014498627.1| PREDICTED: transcription initiation factor IIF subunit beta [Vigna radiata var. radiata] 1.1e-89	GO:0003824, catalytic activity;GO:0005674, transcription factor TFIIF complex;GO:0006367, transcription initiation from RNA polymerase II promoter	K03139-ko03022 Basal transcription factors	63.2044	40.7407	35.15	17.0886	26.2111	27.9983	26.652	30.0001	19.2669	15.0737	19.6006	16.976	16.6809	13.8151	15.1523	26.2004	24.6219	36.8386
T_40135_c0_g1	gi|359806078|ref|NP_001241439.1| uncharacterized protein LOC100786906 precursor [Glycine max] 5.9e-83	GO:0004553, hydrolase activity, hydrolyzing O-glycosyl compounds;GO:0005618, cell wall;GO:0010411, xyloglucan metabolic process;GO:0016762, xyloglucan:xyloglucosyl transferase activity;GO:0042546, cell wall biogenesis;GO:0048046, apoplast;GO:0071555, cell wall organization	-	95.1945	119.647	86.1385	21.9845	60.4715	90.5084	44.0722	29.5197	47.8878	40.9592	43.4801	83.4952	55.1678	47.3387	53.5756	39.9442	80.6906	83.8433
T_40136_c2_g1	gi|571478172|ref|XP_006587486.1| PREDICTED: uncharacterized protein LOC100817981 isoform X2 [Glycine max] 6.6e-40	-	-	11.0396	16.5317	15.5644	28.9394	45.8389	41.4428	20.5381	14.1532	83.0886	19.8403	25.1926	29.4885	80.505	42.9365	42.006	23.8805	67.7118	60.4307
T_40142_c1_g2	gi|947068901|gb|KRH17792.1| hypothetical protein GLYMA_13G016400 [Glycine max] 3.8e-12	-	-	5940.13	976.181	2185.19	859.817	240.727	1775.74	838.901	450.739	370.618	1389.84	1255.97	2532.14	4473.22	783.91	720.253	659.907	1390.05	1533.31
T_40147_c2_g1	gi|734367789|gb|KHN18435.1| FAS-associated factor 2-B [Glycine soja] 1.4e-197	GO:0005886, plasma membrane	-	11.9492	6.50848	5.9454	3.23514	3.62276	4.29121	3.84278	3.09429	2.75624	2.49908	2.33026	3.26923	2.34342	1.74822	2.68444	1.62216	3.50474	2.94664
T_40147_c2_g3	gi|356496014|ref|XP_003516865.1| PREDICTED: nudix hydrolase 1 [Glycine max] 8.9e-79	GO:0000210, NAD+ diphosphatase activity;GO:0005829, cytosol;GO:0006203, dGTP catabolic process;GO:0006974, cellular response to DNA damage stimulus;GO:0008413, 8-oxo-7,8-dihydroguanosine triphosphate pyrophosphatase activity;GO:0019177, dihydroneopterin triphosphate pyrophosphohydrolase activity;GO:0035539, 8-oxo-7,8-dihydrodeoxyguanosine triphosphate pyrophosphatase activity;GO:0046872, metal io…	-	17.5051	13.535	12.1602	22.7894	15.7655	12.958	14.7698	13.7973	15.285	40.7405	9.11882	11.7736	43.0034	91.2404	9.24732	72.431	44.8527	51.6268
T_40159_c3_g1	gi|571444108|ref|XP_003521957.2| PREDICTED: probable leucine-rich repeat receptor-like protein kinase At1g35710 [Glycine max] 2.7e-53	GO:0004672, protein kinase activity;GO:0004674, protein serine/threonine kinase activity;GO:0005524, ATP binding;GO:0005886, plasma membrane;GO:0009506, plasmodesma;GO:0016020, membrane;GO:0016021, integral component of membrane;GO:0090406, pollen tube	-	15.0169	8.89012	7.37009	0.810482	0.633125	1.38555	7.90299	4.91101	1.35435	4.97525	6.33508	1.26032	3.75953	6.12751	2.88638	7.30895	11.1649	19.7182
T_40159_c3_g8	gi|568214657|ref|NP_001275202.1| transketolase, chloroplastic [Solanum tuberosum] 1.0e-31	GO:0004802, transketolase activity;GO:0005634, nucleus;GO:0005737, cytoplasm;GO:0005829, cytosol;GO:0008152, metabolic process;GO:0009052, pentose-phosphate shunt, non-oxidative branch;GO:0046872, metal ion binding	-	1060.86	1587.09	1475.26	1533.83	2351.53	1807.69	1694.01	2139.27	3517.94	1988.24	3001.95	2547.12	2839.19	2231.43	3342.41	2201.16	2190.39	1695.3
T_40164_c1_g1	gi|571461147|ref|XP_003527005.2| PREDICTED: galactinol--sucrose galactosyltransferase isoform X1 [Glycine max] 0.0e+00	GO:0003824, catalytic activity;GO:0005975, carbohydrate metabolic process;GO:0047274, galactinol-sucrose galactosyltransferase activity	K06617-ko00052 Galactose metabolism	26.8363	39.5604	19.8563	6.99042	8.82623	12.496	8.51716	7.09928	10.5377	6.66238	19.0469	21.8874	10.4882	10.984	16.9232	6.53155	15.0149	15.9006
T_40165_c0_g2	gi|734344366|gb|KHN10451.1| Cytochrome P450 71A1 [Glycine soja] 1.4e-80	GO:0004497, monooxygenase activity;GO:0005506, iron ion binding;GO:0005789, endoplasmic reticulum membrane;GO:0009835, fruit ripening;GO:0016021, integral component of membrane;GO:0016705, oxidoreductase activity, acting on paired donors, with incorporation or reduction of molecular oxygen;GO:0020037, heme binding	-	23.7937	21.5037	17.7462	13.1542	10.0542	12.4165	10.8778	10.9371	4.42386	7.13414	14.3434	5.31794	5.15314	2.53228	4.22622	12.2174	13.5245	13.1921
T_40165_c0_g3	gi|959092400|ref|NP_001304406.1| cytochrome P450 71A1-like [Glycine max] 2.4e-42	GO:0004497, monooxygenase activity;GO:0005506, iron ion binding;GO:0016021, integral component of membrane;GO:0016705, oxidoreductase activity, acting on paired donors, with incorporation or reduction of molecular oxygen;GO:0020037, heme binding	-	17.317	19.7254	17.2259	5.02267	10.4578	16.3261	15.9763	16.1612	6.75035	13.6438	16.6835	6.37544	5.5484	3.09916	7.85232	19.1368	8.51592	8.70803
T_40169_c1_g3	-	-	-	2.08937	9.75144	10.1895	10.323	11.8629	9.43989	15.3252	21.3051	23.6788	18.7628	17.1517	10.6766	14.3776	13.6805	14.134	9.94249	6.47979	3.74071
T_40171_c1_g2	gi|955311180|ref|XP_003520905.2| PREDICTED: aldo-keto reductase family 4 member C9 [Glycine max] 8.7e-27	GO:0004033, aldo-keto reductase (NADP) activity;GO:0008106, alcohol dehydrogenase (NADP+) activity;GO:0009409, response to cold;GO:0009414, response to water deprivation;GO:0009507, chloroplast;GO:0009636, response to toxic substance;GO:0009651, response to salt stress;GO:0016229, steroid dehydrogenase activity;GO:0016491, oxidoreductase activity;GO:0055114, oxidation-reduction process;GO:0070401…	-	92.4319	84.7577	78.6377	168.974	133.733	138.812	139.543	148.374	79.7125	187.754	104.135	46.5076	172.51	160.036	122.047	182.379	189.128	167.412
T_40175_c0_g3	-	-	-	24.4777	17.6839	33.4198	22.6657	18.1958	17.1146	16.4998	23.9472	11.3205	14.4245	14.457	10.6933	7.18776	3.29154	18.193	7.00505	7.28496	6.01797
T_40177_c1_g4	gi|571553255|ref|XP_006603797.1| PREDICTED: katanin p80 WD40 repeat-containing subunit B1 homolog [Glycine max] 0.0e+00	GO:0005874, microtubule;GO:0008352, katanin complex;GO:0051013, microtubule severing;GO:0080008, Cul4-RING E3 ubiquitin ligase complex	-	13.1104	12.2238	9.99463	5.70302	6.53188	9.80088	7.44776	7.16188	5.16295	4.62817	6.22477	5.45785	5.27442	3.85589	6.71426	4.04933	6.62295	9.14066
T_40180_c1_g1	gi|356533911|ref|XP_003535501.1| PREDICTED: uncharacterized protein LOC100786623 isoform X1 [Glycine max] 0.0e+00	GO:0031047, gene silencing by RNA	-	25.0805	11.7244	8.69907	6.32649	7.37404	9.51345	6.00669	6.96873	4.2661	4.92027	6.34996	4.6581	4.41662	5.07457	4.67506	5.94458	5.81511	9.91182
T_40181_c1_g4	gi|947129653|gb|KRH77507.1| hypothetical protein GLYMA_01G217700 [Glycine max] 5.0e-129	GO:0009651, response to salt stress;GO:0009816, defense response to bacterium, incompatible interaction;GO:0009817, defense response to fungus, incompatible interaction	-	49.8673	58.7842	43.2633	270.867	328.791	153.402	199.877	181.619	273.439	143.288	46.9697	45.2729	121.305	241.472	66.5813	114.721	84.0438	50.0677
T_40185_c0_g1	-	-	-	0	1.02265	0.532095	0.313062	1.27518	0.168677	1.16903	0.516782	1.12768	1.02118	0.662594	0.59768	0.339728	0.259291	0.299462	3.52376	6.73252	6.08465
T_40185_c1_g2	gi|356503683|ref|XP_003520635.1| PREDICTED: ABC transporter G family member 20-like [Glycine max] 0.0e+00	GO:0005524, ATP binding;GO:0005886, plasma membrane;GO:0010345, suberin biosynthetic process;GO:0016021, integral component of membrane;GO:0042626, ATPase activity, coupled to transmembrane movement of substances	-	10.388	17.6782	17.2686	38.3661	26.7947	13.5615	23.5941	36.3379	38.1669	42.5287	30.3605	26.6595	23.0606	40.5246	24.0907	34.0739	16.4091	12.0192
T_40187_c0_g1	gi|947066270|gb|KRH15413.1| hypothetical protein GLYMA_14G086300 [Glycine max] 1.8e-149	GO:0004067, asparaginase activity;GO:0008798, beta-aspartyl-peptidase activity;GO:0016787, hydrolase activity	-	222.618	319.948	343.711	1148.85	514.714	563.202	783.383	743.436	538.834	507.887	466.771	446.442	385.834	604.231	340.14	307.068	272.756	248.126
T_40188_c0_g1	gi|571469287|ref|XP_006584673.1| PREDICTED: DDT domain-containing protein DDB_G0282237-like [Glycine max] 0.0e+00	GO:0006261, DNA-dependent DNA replication;GO:0006338, chromatin remodeling;GO:0006351, transcription, DNA-templated;GO:0006355, regulation of transcription, DNA-templated;GO:0008270, zinc ion binding;GO:0008623, CHRAC;GO:0016590, ACF complex	-	11.1463	6.72777	2.7276	1.40438	1.76681	2.17945	2.41256	2.26811	1.91157	2.00351	2.21553	2.50076	2.66171	2.47826	1.05171	1.4475	2.4688	2.8828
T_40190_c2_g1	gi|1012334793|gb|KYP46143.1| hypothetical protein KK1_032310 [Cajanus cajan] 7.3e-103	GO:0005743, mitochondrial inner membrane;GO:0009916, alternative oxidase activity;GO:0016021, integral component of membrane;GO:0046872, metal ion binding;GO:0070469, respiratory chain	-	9.29436	8.45534	12.6265	59.3233	32.6629	28.6307	54.7409	66.2666	85.3887	150.321	13.8055	10.6492	80.2688	184.288	20.396	217.76	69.9221	79.5597
T_40193_c0_g1	gi|356568060|ref|XP_003552231.1| PREDICTED: probable aquaporin PIP1-2 [Glycine max] 1.9e-158	GO:0005215, transporter activity;GO:0005773, vacuole;GO:0005887, integral component of plasma membrane;GO:0009506, plasmodesma;GO:0009992, cellular water homeostasis;GO:0015250, water channel activity;GO:0015254, glycerol channel activity;GO:0016021, integral component of membrane;GO:0034220, ion transmembrane transport	-	5.29896	8.20054	12.0756	12.093	25.6085	16.1372	17.3082	8.84797	24.5678	15.7155	25.2853	19.4383	30.1725	20.5197	17.8239	11.302	12.8931	11.8449
T_40193_c0_g2	gi|734312513|gb|KHN00691.1| Aquaporin PIP2-2 [Glycine soja] 4.0e-98	GO:0005215, transporter activity;GO:0005773, vacuole;GO:0005887, integral component of plasma membrane;GO:0009506, plasmodesma;GO:0009992, cellular water homeostasis;GO:0015250, water channel activity;GO:0015254, glycerol channel activity;GO:0016021, integral component of membrane;GO:0034220, ion transmembrane transport	-	253.395	630.462	535.2	195.171	300.199	327.364	155.578	202.985	160.619	190.684	264.608	495.351	180.545	193.305	121.622	137.892	536.518	426.093
T_40196_c0_g1	gi|593801598|ref|XP_007163836.1| hypothetical protein PHAVU_001G268300g [Phaseolus vulgaris] 9.9e-64	GO:0005886, plasma membrane;GO:0006869, lipid transport;GO:0008289, lipid binding;GO:0031225, anchored component of membrane	-	4.58707	11.946	15.424	11.3241	25.0072	27.7407	20.7219	21.2504	21.1014	18.8823	16.2783	12.7644	21.8754	14.0015	20.4085	18.3485	14.5713	14.5349
T_40196_c1_g4	gi|356558518|ref|XP_003547552.1| PREDICTED: NAD(P)H-dependent 6'-deoxychalcone synthase-like [Glycine max] 2.2e-88	GO:0009813, flavonoid biosynthetic process;GO:0016491, oxidoreductase activity;GO:0033808, 6'-deoxychalcone synthase activity	-	24.5974	17.3294	10.0497	17.5179	14.4428	11.7644	19.177	36.8351	14.6131	35.2876	24.5486	8.38776	27.88	35.0724	29.4187	49.5428	27.0784	34.2254
T_40199_c0_g1	gi|955362182|ref|XP_014622051.1| PREDICTED: uncharacterized protein LOC102664495 isoform X1 [Glycine max] 4.6e-58	-	-	5.53024	4.78458	4.76828	0.66938	1.20167	1.67476	1.47911	1.73596	1.54821	0.387888	1.64794	0.278514	0.962524	1.48015	0.850505	3.10502	2.55166	5.8691
T_40202_c0_g2	gi|734407611|gb|KHN34417.1| Putative inactive purple acid phosphatase 27 [Glycine soja] 2.6e-84	GO:0003993, acid phosphatase activity;GO:0005576, extracellular region;GO:0046872, metal ion binding	-	3.20048	3.43937	7.41226	15.9559	16.7899	7.83141	11.3383	24.8744	12.7183	36.2089	19.0064	2.77303	8.53579	4.46993	20.9678	5.57807	3.83277	8.54904
T_40203_c5_g1	gi|947114145|gb|KRH62447.1| hypothetical protein GLYMA_04G109500, partial [Glycine max] 3.1e-28	GO:0043531, ADP binding	-	13.9945	10.6515	36.2659	3.44487	0.742918	1.10562	33.8355	15.7177	5.65009	7.20878	20.9744	1.16308	4.7632	3.43327	9.57648	28.1203	22.2512	24.523
T_40210_c0_g1	gi|356558093|ref|XP_003547342.1| PREDICTED: uncharacterized protein LOC100802663 [Glycine max] 1.8e-175	-	-	6.76366	5.85797	4.21561	1.1196	2.23383	4.62772	2.43714	1.9542	1.5832	1.41132	2.18132	2.0298	2.98452	2.1017	1.52404	2.19146	3.0398	2.91612
T_40211_c0_g2	gi|947039568|gb|KRG89292.1| hypothetical protein GLYMA_20G014200 [Glycine max] 5.4e-278	GO:0005737, cytoplasm;GO:0005874, microtubule	-	9.58578	6.6594	6.04438	1.77456	1.39299	5.39894	5.72848	3.87938	1.72446	2.15836	3.21609	3.28042	2.446	1.69921	3.82723	1.56588	2.90408	6.14585
T_40212_c0_g1	gi|571493161|ref|XP_006592458.1| PREDICTED: uncharacterized protein LOC100787752 isoform X1 [Glycine max] 1.5e-166	-	-	11.5417	6.76027	5.76334	3.54853	0.405901	2.1333	2.41497	4.35504	2.3372	1.07508	4.30906	2.04691	1.861	2.62907	2.63811	3.50921	1.33057	4.41759
T_40213_c1_g2	gi|255630726|gb|ACU15724.1| unknown [Glycine max] 3.4e-50	GO:0004866, endopeptidase inhibitor activity;GO:0004867, serine-type endopeptidase inhibitor activity	-	3.86229	2.48926	1.15788	1.08926	2.76989	0.587364	1.81321	1.02728	1.05686	2.5304	0.288275	1.81985	6.42084	9.99529	0.585627	5.34955	15.4679	88.7886
T_40213_c1_g5	gi|18143656|dbj|BAB82379.1| Mcp20 [Matricaria chamomilla] 4.4e-44	GO:0004866, endopeptidase inhibitor activity;GO:0004867, serine-type endopeptidase inhibitor activity	-	10.9523	9.53858	16.723	67.8726	53.0293	14.5881	25.2953	103.212	5.89872	83.9084	92.7917	10.3617	7.40656	3.46247	21.4412	137.707	2.47286	6.35121
T_40214_c4_g7	gi|951041260|ref|XP_014517895.1| PREDICTED: 14 kDa proline-rich protein DC2.15-like [Vigna radiata var. radiata] 1.2e-54	GO:0016021, integral component of membrane	-	11.6405	16.8922	21.8492	21.0935	62.2894	138.667	25.6975	33.2609	99.8812	67.6968	21.7388	24.1171	81.6568	30.7695	32.3749	64.6791	64.5018	55.4785
T_40214_c5_g1	gi|351727849|ref|NP_001236151.1| uncharacterized protein LOC100527442 [Glycine max] 5.3e-74	GO:0005737, cytoplasm;GO:0016020, membrane;GO:0030001, metal ion transport;GO:0046914, transition metal ion binding;GO:0046916, cellular transition metal ion homeostasis	-	9.32369	4.80357	6.65257	7.74864	8.32356	7.98058	8.37476	7.46244	11.237	9.86391	5.39165	3.12124	13.0561	17.145	9.55986	15.6999	16.22	17.6279
T_40218_c0_g1	gi|571509493|ref|XP_006596136.1| PREDICTED: protein starmaker-like [Glycine max] 1.7e-239	GO:0000398, mRNA splicing, via spliceosome;GO:0005654, nucleoplasm;GO:0015030, Cajal body;GO:0016607, nuclear speck;GO:0047485, protein N-terminus binding;GO:0070742, C2H2 zinc finger domain binding;GO:0071013, catalytic step 2 spliceosome	-	31.564	11.5168	6.98976	7.7466	3.20608	7.2077	3.47465	5.02598	5.64227	3.08006	6.4334	3.84841	4.41492	3.09751	3.94469	4.61504	7.20556	4.67144
T_40220_c0_g1	gi|947043809|gb|KRG93438.1| hypothetical protein GLYMA_19G016400 [Glycine max] 1.9e-42	GO:0005524, ATP binding;GO:0005886, plasma membrane;GO:0016021, integral component of membrane;GO:0042626, ATPase activity, coupled to transmembrane movement of substances;GO:0055085, transmembrane transport	-	2.18961	3.04958	5.42479	9.86237	5.92175	2.88378	11.8758	8.57384	10.5567	19.5618	17.8282	5.11195	13.2036	5.15565	14.0374	5.20711	8.70885	2.39746
T_40225_c2_g2	-	-	-	5.0049	4.30959	5.77996	20.0952	15.1586	16.4608	8.76649	10.2478	31.2408	25.3962	4.98017	3.82134	21.2677	34.744	6.62442	18.3413	19.615	22.2636
T_40228_c0_g1	gi|734367799|gb|KHN18445.1| U3 small nucleolar ribonucleoprotein MPP10 [Glycine soja] 4.6e-148	GO:0000375, RNA splicing, via transesterification reactions;GO:0005654, nucleoplasm;GO:0005694, chromosome;GO:0005730, nucleolus;GO:0005732, small nucleolar ribonucleoprotein complex;GO:0006364, rRNA processing;GO:0006396, RNA processing;GO:0008380, RNA splicing;GO:0010923, negative regulation of phosphatase activity;GO:0019013, viral nucleocapsid;GO:0030490, maturation of SSU-rRNA;GO:0032040, sm…	K14559-ko03008 Ribosome biogenesis in eukaryotes	10.9322	7.75015	8.53162	4.14114	4.75723	7.47793	4.54577	4.95767	3.19671	2.49383	3.51103	4.25666	3.11071	1.47457	2.4585	2.00363	3.52972	2.71114
T_40233_c0_g1	gi|571544532|ref|XP_006602223.1| PREDICTED: DEAD-box ATP-dependent RNA helicase 28-like isoform X2 [Glycine max] 1.4e-268	GO:0003676, nucleic acid binding;GO:0003723, RNA binding;GO:0004004, ATP-dependent RNA helicase activity;GO:0004386, helicase activity;GO:0005524, ATP binding;GO:0006413, translational initiation;GO:0007059, chromosome segregation;GO:0010468, regulation of gene expression;GO:0010501, RNA secondary structure unwinding;GO:0036464, cytoplasmic ribonucleoprotein granule	-	14.084	12.7415	11.4557	11.2622	8.75174	12.6024	8.70891	8.42975	8.57219	7.24727	8.00557	6.95559	7.01591	5.17198	7.66097	4.51069	6.50404	5.5695
T_40238_c1_g5	gi|571471155|ref|XP_006585224.1| PREDICTED: phosphatidylinositol 4-phosphate 5-kinase 7 isoform X2 [Glycine max] 6.7e-180	GO:0005524, ATP binding;GO:0016308, 1-phosphatidylinositol-4-phosphate 5-kinase activity	-	8.41952	5.09772	5.37872	2.00752	2.0633	2.32658	4.78674	3.47513	2.45747	2.38465	3.35474	1.61556	4.86984	0.440351	2.69418	1.53709	2.51551	1.2224
T_40239_c0_g1	gi|947105293|gb|KRH53676.1| hypothetical protein GLYMA_06G139800 [Glycine max] 0.0e+00	-	-	14.6746	11.6971	7.93944	4.58604	2.82606	6.72962	3.9828	3.07479	3.46718	2.29146	4.96154	3.3225	3.61471	1.78017	3.95451	3.00803	4.5936	5.86368
T_40241_c1_g1	gi|947051977|gb|KRH01506.1| hypothetical protein GLYMA_18G2816002, partial [Glycine max] 2.1e-166	GO:0005524, ATP binding;GO:0006952, defense response;GO:0008234, cysteine-type peptidase activity;GO:0043531, ADP binding	-	70.704	24.4903	17.09	8.2077	6.38509	15.6022	12.3208	10.2807	9.2722	8.6147	13.0198	13.1595	11.712	13.1815	12.3975	15.1981	22.3731	51.1186
T_40245_c3_g2	gi|734404254|gb|KHN32905.1| Putative phospholipase A2 like 1 [Glycine soja] 1.4e-62	GO:0004623, phospholipase A2 activity;GO:0005509, calcium ion binding;GO:0005576, extracellular region;GO:0016042, lipid catabolic process	-	3.16064	3.53645	2.14292	3.84832	3.50513	5.70629	4.30587	4.58863	5.1288	4.51194	4.90415	4.58876	6.06644	11.5964	5.80039	6.53317	4.97106	6.18492
T_40245_c3_g3	gi|734346276|gb|KHN11051.1| hypothetical protein glysoja_044075 [Glycine soja] 1.4e-29	GO:0016021, integral component of membrane	-	14.0861	17.0819	24.9471	39.1386	36.7364	32.9436	37.7339	47.231	42.8645	46.4513	29.8676	32.6652	32.0105	25.3773	42.5897	21.1839	14.2904	11.4557
T_40246_c1_g1	gi|356525197|ref|XP_003531213.1| PREDICTED: selenium-binding protein 1 [Glycine max] 1.6e-293	GO:0008430, selenium binding;GO:0010197, polar nucleus fusion	-	3.3797	3.87698	2.30945	6.11396	10.1302	8.3914	11.7898	13.4935	7.37667	14.5712	9.08906	3.47996	9.87348	16.7082	6.05938	18.9706	7.29532	11.323
T_40253_c0_g1	gi|356555684|ref|XP_003546160.1| PREDICTED: probable WRKY transcription factor 31 [Glycine max] 1.0e-129	GO:0003700, DNA binding transcription factor activity;GO:0005634, nucleus;GO:0006351, transcription, DNA-templated;GO:0009873, ethylene-activated signaling pathway;GO:0010200, response to chitin;GO:0016036, cellular response to phosphate starvation;GO:0043565, sequence-specific DNA binding;GO:0044212, transcription regulatory region DNA binding;GO:0045892, negative regulation of transcription, DN…	-	36.6594	75.3253	82.1024	81.3332	59.2236	46.1992	98.362	73.3894	113.215	89.3845	142.291	75.6539	86.0882	96.4285	89.8568	182.65	174.041	113.768
T_40253_c0_g3	gi|571467949|ref|XP_003528693.2| PREDICTED: WRKY transcription factor 6 [Glycine max] 2.5e-73	GO:0003700, DNA binding transcription factor activity;GO:0005634, nucleus;GO:0006351, transcription, DNA-templated;GO:0009873, ethylene-activated signaling pathway;GO:0010200, response to chitin;GO:0016036, cellular response to phosphate starvation;GO:0043565, sequence-specific DNA binding;GO:0044212, transcription regulatory region DNA binding;GO:0045892, negative regulation of transcription, DN…	-	7.92106	11.9066	31.5463	23.4792	20.9762	15.5292	28.6139	21.2461	50.9954	45.7825	36.5742	23.3242	38.4356	41.2856	33.6107	70.9898	66.9875	45.2177
T_40253_c1_g1	gi|734383523|gb|KHN23963.1| Bidirectional sugar transporter SWEET14 [Glycine soja] 9.2e-94	GO:0005886, plasma membrane;GO:0005887, integral component of plasma membrane;GO:0008515, sucrose transmembrane transporter activity;GO:0008643, carbohydrate transport;GO:0015770, sucrose transport;GO:0016021, integral component of membrane;GO:0051119, sugar transmembrane transporter activity	-	206.475	183.714	145.744	117.541	111.321	150.043	88.1891	93.6947	45.9508	78.0259	114.526	149.516	57.9645	47.7971	75.0525	106.849	38.381	82.3469
T_40253_c1_g2	gi|356527765|ref|XP_003532478.1| PREDICTED: bidirectional sugar transporter SWEET14-like [Glycine max] 3.9e-125	GO:0005886, plasma membrane;GO:0005887, integral component of plasma membrane;GO:0008515, sucrose transmembrane transporter activity;GO:0008643, carbohydrate transport;GO:0015770, sucrose transport;GO:0016021, integral component of membrane;GO:0051119, sugar transmembrane transporter activity	-	76.3919	93.8689	71.9772	37.4582	62.3206	64.3257	50.7859	40.9252	26.4548	48.0697	26.9032	54.1012	32.8785	23.4125	41.2572	19.1905	20.3707	24.9419
T_40260_c0_g2	gi|356544144|ref|XP_003540515.1| PREDICTED: bidirectional sugar transporter SWEET2 [Glycine max] 3.5e-47	GO:0005886, plasma membrane;GO:0005887, integral component of plasma membrane;GO:0008643, carbohydrate transport;GO:0016021, integral component of membrane;GO:0051119, sugar transmembrane transporter activity	-	1.16895	1.16021	1.45794	1.27332	1.52187	0.998883	1.08343	1.24592	1.4553	3.35301	0.709431	0.879815	2.49827	8.36194	0.192746	11.2331	4.09171	1.81176
T_40264_c3_g1	gi|356551983|ref|XP_003544351.1| PREDICTED: sucrose synthase 6-like [Glycine max] 0.0e+00	GO:0005576, extracellular region;GO:0005618, cell wall;GO:0005985, sucrose metabolic process;GO:0016157, sucrose synthase activity;GO:0080165, callose deposition in phloem sieve plate	K00695-ko00500 Starch and sucrose metabolism	10.0875	5.93851	5.3528	2.10529	2.5364	3.26279	2.38546	1.18311	1.70656	1.24289	1.38702	1.90871	2.76282	0.904341	2.33199	1.53074	3.44265	2.2084
T_40264_c3_g2	gi|356561845|ref|XP_003549187.1| PREDICTED: sucrose synthase 7-like [Glycine max] 0.0e+00	GO:0005576, extracellular region;GO:0005618, cell wall;GO:0005985, sucrose metabolic process;GO:0016021, integral component of membrane;GO:0016157, sucrose synthase activity;GO:0080165, callose deposition in phloem sieve plate	K03843-ko00510 N-Glycan biosynthesis;ko00513 Various types of N-glycan biosynthesis	20.5764	15.7496	14.4368	5.99191	8.8643	10.8736	9.03192	4.72777	5.33242	3.10799	5.00339	5.20593	7.04972	2.13094	4.74327	4.87935	6.7127	8.84398
T_40265_c1_g1	gi|593238506|ref|XP_007132796.1| hypothetical protein PHAVU_011G125400g [Phaseolus vulgaris] 4.9e-142	GO:0004722, protein serine/threonine phosphatase activity;GO:0046872, metal ion binding	-	18.8087	13.5792	18.3376	5.03902	4.98686	5.35117	5.54184	6.89691	6.92514	5.98597	5.33782	4.29369	3.68117	4.17757	2.48827	9.15951	10.4005	12.9971
T_40266_c4_g2	gi|1012335105|gb|KYP46445.1| hypothetical protein KK1_031958 [Cajanus cajan] 1.3e-161	-	-	15.1335	7.26904	4.26678	2.00829	0.894592	6.21949	4.54587	4.60861	3.05382	1.38606	2.40785	2.26116	2.29269	2.18754	2.38587	2.06071	2.49718	5.67148
T_40268_c4_g2	gi|356500703|ref|XP_003519171.1| PREDICTED: UDP-glucuronate 4-epimerase 1-like [Glycine max] 1.1e-239	GO:0005768, endosome;GO:0005794, Golgi apparatus;GO:0005802, trans-Golgi network;GO:0005975, carbohydrate metabolic process;GO:0016021, integral component of membrane;GO:0016857, racemase and epimerase activity, acting on carbohydrates and derivatives;GO:0032580, Golgi cisterna membrane;GO:0033481, galacturonate biosynthetic process;GO:0050378, UDP-glucuronate 4-epimerase activity;GO:0050829, def…	K08679-ko00500 Starch and sucrose metabolism;ko00520 Amino sugar and nucleotide sugar metabolism	101.87	199.805	334.76	49.6431	117.281	61.4204	372.205	222.028	222.613	262.652	384.157	159.726	272.435	264.075	281.046	417.864	436.043	294.384
T_40274_c1_g1	gi|920714529|gb|KOM54617.1| hypothetical protein LR48_Vigan10g050900 [Vigna angularis] 9.5e-29	-	-	17.1975	10.3342	5.46499	8.53324	2.02383	6.73307	3.66008	6.22514	3.26798	3.013	4.13733	2.8408	3.53365	3.22963	3.25394	5.89644	5.52023	9.57718
T_40276_c1_g2	gi|356538739|ref|XP_003537858.1| PREDICTED: probable nucleolar protein 5-2 [Glycine max] 6.0e-119	GO:0000154, rRNA modification;GO:0005730, nucleolus;GO:0016020, membrane;GO:0030515, snoRNA binding;GO:0031428, box C/D snoRNP complex;GO:0032040, small-subunit processome	K14565-ko03008 Ribosome biogenesis in eukaryotes	56.0044	67.1395	66.796	54.3015	67.9359	83.6258	55.236	49.5934	35.0617	39.2046	40.9838	42.2654	40.7242	28.3566	33.6552	23.9625	30.0404	20.674
T_40279_c0_g2	gi|351721482|ref|NP_001235163.1| uncharacterized protein LOC100499982 [Glycine max] 2.1e-63	GO:0003824, catalytic activity;GO:0008152, metabolic process;GO:0016787, hydrolase activity	-	37.0392	33.3602	26.0458	12.8475	24.9166	24.6442	13.33	16.3266	15.0278	10.0306	20.8077	19.1544	28.2992	17.6289	22.9187	19.1727	28.9223	39.1725
T_40286_c1_g2	-	-	-	3.45932	3.14665	4.1637	7.79717	5.60791	12.5872	6.25335	5.51772	6.78994	5.57739	3.69109	6.84112	3.99819	5.83638	3.43266	2.8786	3.38017	3.28507
T_40286_c4_g1	-	-	-	39.1084	46.6417	42.468	45.5746	64.4818	90.7372	66.4853	34.755	60.6094	57.8431	111.809	62.9258	111.208	96.0432	107.648	76.6284	40.3889	150.775
T_40289_c0_g2	-	-	-	5.81187	4.47797	3.78537	18.0291	9.94457	9.27243	9.15368	9.79303	13.0427	23.3624	9.02263	3.32687	5.66741	19.2383	1.14397	19.1337	9.0763	11.1083
T_40297_c0_g1	gi|356542033|ref|XP_003539476.1| PREDICTED: NAC domain-containing protein 90 [Glycine max] 2.6e-51	GO:0003677, DNA binding;GO:0003700, DNA binding transcription factor activity;GO:0005634, nucleus;GO:0006351, transcription, DNA-templated;GO:0006355, regulation of transcription, DNA-templated	-	2.66768	2.12703	2.46914	0.207285	0.683973	0.706254	3.88474	2.84194	0.528184	1.78336	2.08351	0.874427	0.723595	0.452057	1.51132	9.66062	7.47672	6.77425
T_40298_c2_g9	gi|734370867|gb|KHN19483.1| LRR receptor-like serine/threonine-protein kinase FLS2 [Glycine soja] 1.6e-198	GO:0005886, plasma membrane;GO:0016021, integral component of membrane;GO:0016301, kinase activity	-	14.049	8.83131	7.28546	4.72932	6.7793	7.36681	5.46855	7.27707	4.94978	3.57979	6.34024	4.44494	3.62634	3.26502	4.79427	4.23315	5.77216	5.31173
T_40301_c1_g5	gi|955364043|ref|XP_014622516.1| PREDICTED: ABC transporter G family member 39-like isoform X5 [Glycine max] 8.9e-207	GO:0005524, ATP binding;GO:0005886, plasma membrane;GO:0006810, transport;GO:0016021, integral component of membrane;GO:0016887, ATPase activity;GO:0042626, ATPase activity, coupled to transmembrane movement of substances	-	21.7974	13.1461	9.71459	4.94405	5.02469	9.53859	5.04418	5.98127	2.67454	2.99958	5.72156	3.89618	4.43802	3.32314	4.81141	6.42397	9.64234	14.7047
T_40314_c4_g1	gi|571477400|ref|XP_006587254.1| PREDICTED: metal tolerance protein 10-like [Glycine max] 2.4e-214	GO:0005385, zinc ion transmembrane transporter activity;GO:0005774, vacuolar membrane;GO:0008324, cation transmembrane transporter activity;GO:0010043, response to zinc ion;GO:0016020, membrane;GO:0016021, integral component of membrane;GO:0061088, regulation of sequestering of zinc ion	-	4.1985	3.32329	1.12634	1.08946	1.21703	0.395041	13.7177	7.00186	4.52272	2.02636	30.9427	1.02158	7.33027	4.97733	38.9559	1.73306	2.91666	6.6877
T_40320_c0_g1	gi|955310879|ref|XP_014628989.1| PREDICTED: dirigent protein 19-like [Glycine max] 3.8e-89	GO:0009699, phenylpropanoid biosynthetic process;GO:0042349, guiding stereospecific synthesis activity;GO:0048046, apoplast	-	19.378	33.8022	40.7515	171.51	163.267	87.3372	89.2991	139.13	145.021	237.649	88.2445	45.3926	160.651	318.708	90.5518	155.332	145.303	54.4722
T_40320_c1_g6	gi|358249244|ref|NP_001240272.1| uncharacterized protein LOC100777334 [Glycine max] 2.6e-51	GO:0005622, intracellular;GO:0005737, cytoplasm;GO:0006810, transport;GO:0015031, protein transport	-	0.557992	0.592847	1.36108	4.64376	8.08322	4.18142	1.6478	1.6728	18.7152	4.2423	2.87164	2.23204	10.3953	7.04119	5.50769	1.62084	4.18119	3.19139
T_40323_c1_g3	gi|947050508|gb|KRH00037.1| hypothetical protein GLYMA_18G187300 [Glycine max] 2.4e-30	-	-	77.7871	53.0941	37.451	94.8189	105.782	51.2855	91.8919	98.3649	77.7627	125.655	134.794	51.8358	148.128	169.056	188.994	159.153	77.6553	122.828
T_40327_c1_g1	gi|356563991|ref|XP_003550240.1| PREDICTED: uncharacterized transporter C405.03c-like [Glycine max] 9.0e-09	GO:0001731, formation of translation preinitiation complex;GO:0003743, translation initiation factor activity;GO:0005829, cytosol;GO:0005852, eukaryotic translation initiation factor 3 complex;GO:0006446, regulation of translational initiation;GO:0016021, integral component of membrane;GO:0016282, eukaryotic 43S preinitiation complex;GO:0033290, eukaryotic 48S preinitiation complex;GO:0043022, ri…	-	5.65064	7.55131	2.75541	1.50377	1.91056	2.84605	5.8907	2.80579	3.14321	1.80377	2.22539	2.01543	3.844	0.637353	1.78378	0.513024	0.483288	2.74399
T_40329_c5_g4	gi|255631556|gb|ACU16145.1| unknown [Glycine max] 8.2e-22	-	-	85.6202	127.86	216.978	109.402	92.2771	54.005	219.524	165.589	141.368	212.642	213.572	74.4716	176.8	227.178	159.936	677.521	331.312	511.191
T_40329_c5_g8	gi|947057374|gb|KRH06780.1| hypothetical protein GLYMA_16G045500 [Glycine max] 1.7e-96	GO:0005199, structural constituent of cell wall;GO:0005789, endoplasmic reticulum membrane;GO:0005886, plasma membrane;GO:0016021, integral component of membrane;GO:0032586, protein storage vacuole membrane	-	11.7579	26.5359	42.8603	5.4922	11.9856	8.88171	35.5173	19.2483	22.3078	29.5281	32.9612	16.695	23.1047	23.8692	23.4416	65.4052	52.843	42.6551
T_40333_c1_g1	gi|1012334965|gb|KYP46309.1| Subtilisin-like protease [Cajanus cajan] 2.2e-117	GO:0004252, serine-type endopeptidase activity;GO:0005618, cell wall;GO:0006508, proteolysis;GO:0008236, serine-type peptidase activity;GO:0010037, response to carbon dioxide;GO:0048046, apoplast;GO:2000038, regulation of stomatal complex development;GO:2000122, negative regulation of stomatal complex development	-	55.0477	48.3247	55.1074	15.9813	21.4768	28.1875	26.1454	15.6106	23.261	18.1217	34.0787	21.9539	27.4544	16.7436	71.4875	9.88931	49.4989	37.724
T_40333_c1_g2	gi|593698946|ref|XP_007149938.1| hypothetical protein PHAVU_005G111800g [Phaseolus vulgaris] 6.9e-260	GO:0003700, DNA binding transcription factor activity;GO:0005634, nucleus;GO:0006351, transcription, DNA-templated;GO:0006355, regulation of transcription, DNA-templated;GO:0043565, sequence-specific DNA binding	-	11.8308	11.4498	5.73085	12.9177	18.8338	15.2391	19.4089	18.6458	18.5524	19.2613	36.5271	16.0314	14.9814	13.0597	29.9463	3.57342	9.58544	9.42046
T_40335_c1_g1	gi|955381490|ref|XP_014625638.1| PREDICTED: WAT1-related protein At4g28040-like [Glycine max] 5.7e-111	GO:0005886, plasma membrane;GO:0006810, transport;GO:0016021, integral component of membrane;GO:0022857, transmembrane transporter activity	-	26.8896	13.9547	18.6706	10.5351	22.2072	11.8456	12.2866	15.6771	9.56814	9.95463	6.12752	5.23402	16.2231	13.1077	7.14419	13.3465	11.4113	10.1563
T_40335_c1_g2	-	-	-	577.725	1529.36	2470.57	4312.82	4294.5	4238.14	2166.09	1498.69	6062.79	2421.04	2130.93	2983.31	3471.64	1304.56	2127.1	1289.24	1821.66	1388.75
T_40335_c1_g5	gi|947102460|gb|KRH50952.1| hypothetical protein GLYMA_07G253500 [Glycine max] 1.3e-88	GO:0016021, integral component of membrane	-	0.378931	0.143734	0.214781	1.15947	1.05137	0.163495	2.88777	3.67075	5.79378	2.97048	5.00838	0.650001	1.67545	6.83729	8.9773	11.7902	2.37294	1.69821
T_40336_c0_g3	gi|947055812|gb|KRH05265.1| hypothetical protein GLYMA_17G216600 [Glycine max] 3.3e-84	GO:0008233, peptidase activity	-	14.952	6.64247	6.19653	3.68259	3.21718	6.06962	5.21232	3.96796	3.26135	1.74099	3.20754	4.61545	3.41628	2.0794	2.38116	2.66218	4.28643	5.47765
T_40336_c0_g5	gi|571567379|ref|XP_006606063.1| PREDICTED: transcription repressor OFP12-like [Glycine max] 9.6e-51	GO:0005634, nucleus;GO:0006351, transcription, DNA-templated;GO:0045892, negative regulation of transcription, DNA-templated	-	9.56154	10.8239	5.41121	18.0706	9.61411	10.8525	9.92999	15.4908	16.844	15.5963	18.3822	22.8862	16.4184	17.5629	21.2886	6.46866	4.92135	6.21229
T_40337_c1_g1	gi|734324279|gb|KHN05054.1| Putative ion channel POLLUX-like 2, partial [Glycine soja] 1.3e-308	GO:0006813, potassium ion transport;GO:0008324, cation transmembrane transporter activity;GO:0009507, chloroplast;GO:0009941, chloroplast envelope;GO:0016021, integral component of membrane	-	9.1391	6.69492	5.03685	3.17773	3.07145	5.04972	3.61123	4.4791	2.99771	2.36678	3.26394	3.38797	2.40011	2.55973	2.48784	2.02101	3.41095	4.85783
T_40339_c0_g2	gi|356564053|ref|XP_003550271.1| PREDICTED: uncharacterized protein LOC100778066 [Glycine max] 5.7e-92	-	-	9.80093	5.6602	4.14815	3.53594	3.20648	4.86108	3.22121	2.49974	3.28613	2.24522	2.24008	1.79869	1.66172	3.64479	2.41899	1.54121	3.03322	2.84295
T_40340_c0_g2	gi|870765728|gb|KMS65245.1| hypothetical protein BVRB_037930, partial [Beta vulgaris subsp. vulgaris] 2.6e-42	-	-	6.55275	3.8224	6.67915	17.7223	4.61275	7.08483	7.21263	4.34591	4.98795	7.49466	11.6332	11.0213	12.0476	16.1334	19.3504	14.1422	17.5275	12.4581
T_40341_c1_g4	-	-	-	27.5643	17.6214	20.6512	2.18737	5.7391	16.7769	8.71326	2.8375	5.7707	1.74061	7.03983	12.2477	12.1038	2.58687	5.36971	2.72894	7.78228	17.0703
T_40341_c1_g7	gi|734367505|gb|KHN18300.1| Surfeit locus protein 6 like [Glycine soja] 5.3e-118	-	-	28.9032	16.0534	15.1626	12.7738	10.329	16.8331	11.1002	9.46559	7.6193	6.09232	8.13313	9.67406	8.05967	6.36293	6.22759	5.45761	10.2085	9.58022
T_40344_c1_g1	gi|734435510|gb|KHN47771.1| Hypothetical protein glysoja_029189 [Glycine soja] 1.1e-25	GO:0003676, nucleic acid binding;GO:0005829, cytosol	-	109.474	79.8171	55.311	32.6276	55.6782	64.9689	41.8039	38.0452	30.14	32.0964	30.4663	39.0951	33.7088	32.3746	25.221	39.9503	46.7945	63.4615
T_40356_c2_g1	gi|947126849|gb|KRH74703.1| hypothetical protein GLYMA_01G037700 [Glycine max] 1.4e-218	GO:0005737, cytoplasm;GO:0005874, microtubule	-	12.9234	9.64769	6.46428	6.0854	2.13387	5.14098	3.55293	2.96641	2.21142	1.38353	2.3285	2.84319	2.86321	2.08432	2.91734	1.51297	2.05578	4.19147
T_40359_c0_g1	gi|356496334|ref|XP_003517023.1| PREDICTED: FACT complex subunit SSRP1 [Glycine max] 5.6e-276	GO:0003677, DNA binding;GO:0005634, nucleus;GO:0005694, chromosome;GO:0006260, DNA replication;GO:0006281, DNA repair;GO:0006351, transcription, DNA-templated;GO:0006355, regulation of transcription, DNA-templated	-	31.2764	21.4557	18.4718	12.2682	11.4746	14.3106	12.6314	14.2693	10.9187	9.27452	11.8872	7.69137	8.70916	7.01168	8.82306	9.93605	8.34254	8.7698
T_40361_c1_g1	gi|571460423|ref|XP_006581694.1| PREDICTED: DNA-binding protein BIN4-like isoform X2 [Glycine max] 2.4e-137	GO:0003690, double-stranded DNA binding;GO:0005634, nucleus;GO:0009330, DNA topoisomerase complex (ATP-hydrolyzing);GO:0009913, epidermal cell differentiation;GO:0010090, trichome morphogenesis;GO:0030307, positive regulation of cell growth;GO:0042023, DNA endoreduplication;GO:0048364, root development;GO:0048367, shoot system development;GO:0051276, chromosome organization	-	10.3466	2.64432	3.09974	3.2163	0.574695	2.23423	2.47932	2.4512	1.57762	2.43172	1.04322	0.680357	1.59148	1.53274	1.21159	1.09006	1.36397	2.77814
T_40361_c1_g2	gi|593331606|ref|XP_007139229.1| hypothetical protein PHAVU_008G012300g [Phaseolus vulgaris] 3.1e-55	GO:0005886, plasma membrane;GO:0016021, integral component of membrane	-	0.891014	0.95965	1.75212	5.69409	9.49575	9.14362	2.49423	4.26019	10.0249	6.21078	3.13424	0.819125	8.82758	2.90562	3.27704	3.58496	8.05745	8.40206
T_40361_c1_g5	gi|351723685|ref|NP_001235496.1| CASP-like protein 4D1 [Glycine max] 6.1e-41	GO:0005886, plasma membrane;GO:0016021, integral component of membrane	-	5.21903	1.82405	2.70043	11.4541	10.6624	9.41725	3.53983	4.86009	9.34646	2.93582	6.44135	1.51614	6.65474	2.94902	4.12336	5.47277	6.44513	6.73459
T_40366_c1_g4	gi|1012322460|gb|KYP34763.1| Glycerol-3-phosphate acyltransferase 6 [Cajanus cajan] 3.2e-256	GO:0008152, metabolic process;GO:0008654, phospholipid biosynthetic process;GO:0009908, flower development;GO:0010143, cutin biosynthetic process;GO:0016020, membrane;GO:0016021, integral component of membrane;GO:0016746, transferase activity, transferring acyl groups;GO:0016791, phosphatase activity;GO:0090447, glycerol-3-phosphate 2-O-acyltransferase activity	K13508-ko00564 Glycerophospholipid metabolism;ko00561 Glycerolipid metabolism	10.6298	13.4021	7.34205	12.6896	22.4628	11.5423	18.3797	22.2184	31.7247	21.1733	23.5272	15.2134	12.982	24.3246	17.6756	25.7917	13.5349	10.0528
[truncated: 3,261 more rows]
