# Supplementary material for: Transcriptome sequencing and analysis reveals the molecular response to selenium stimuli in Pueraria lobata (willd.) Ohwi
Source: PeerJ. 2020 Mar 24;8:e8768. doi: 10.7717/peerj.8768 (PMC7100600; doi:10.7717/peerj.8768)
Supplement: Table S10 — D0, D1, D3, D5, D7 and D9 represent different days after sodium selenite treatment. [file peerj-08-8768-s015.xls]

## Sheet: Sheet1
Table S10. ROS scavenging genes in P. lobata
Gene name	Gene ID	DEG(Y/N)	NR annotation	GO annotation	KEGG annotation	Expression profiles（TPM）
						D0-1	D0-2	D0-3	D1-1	D1-2	D1-3	D3-1	D3-2	D3-3	D5-1	D5-2	D5-3	D7-1	D7-2	D7-3	D9-1	D9-2	D9-3
SOD	T_34131_c0_g1	N	gi|992278554|gb|KXG36881.1| hypothetical protein SORBI_002G407900 [Sorghum bicolor] 8.5e-41	GO:0000187, activation of MAPK activity;GO:0000303, response to superoxide;GO:0001541, ovarian follicle development;GO:0001819, positive regulation of cytokine production;GO:0001895, retina homeostasis;GO:0002262, myeloid cell homeostasis;GO:0004784, superoxide dismutase activity;GO:0005507, copper ion binding;GO:0005615, extracellular space;GO:0005634, nucleus;GO:0005654, nucleoplasm;GO:0005737,…	-	1.26934	0.352676	0.323181	1.64977	0.554849	0.307279	0.916118	0.80826	0.632442	0.667693	1.1073	1.18083	0.517297	0.631037	0.729289	1.07609	1.16675	2.15436
	T_36086_c0_g1	N	gi|734403996|gb|KHN32767.1| Superoxide dismutase [Cu-Zn] 2 [Glycine soja] 3.7e-86	GO:0004784, superoxide dismutase activity;GO:0005737, cytoplasm;GO:0046872, metal ion binding	K04565-ko04146 Peroxisome	10.7203	11.5354	7.3625	4.83496	6.36502	5.61229	5.1888	7.65719	4.89798	7.02198	5.54259	5.12969	4.81103	6.72579	5.25561	8.07964	7.93753	10.6428
	T_38968_c2_g4	N	gi|763815079|gb|KJB81931.1| hypothetical protein B456_013G192900 [Gossypium raimondii] 3.9e-58	GO:0004784, superoxide dismutase activity;GO:0005507, copper ion binding;GO:0005737, cytoplasm;GO:0008270, zinc ion binding;GO:0019430, removal of superoxide radicals;GO:0046872, metal ion binding	-	613.274	708.255	437.518	636.889	893.206	780.264	739.492	777.593	745.25	543.634	695.847	808.983	694.394	865.335	701.803	616.924	733.936	810.574
	T_39102_c4_g1	N	gi|571439346|ref|XP_006574834.1| PREDICTED: superoxide dismutase [Fe], chloroplastic isoform X5 [Glycine max] 3.0e-146	GO:0004784, superoxide dismutase activity;GO:0009507, chloroplast;GO:0046872, metal ion binding	K04564-ko04146 Peroxisome;ko04068 FoxO signaling pathway;ko04013 MAPK signaling pathway - fly	2.7773	3.83767	1.7723	2.49035	1.29525	3.4829	2.35835	3.16404	1.16402	2.13241	2.18394	1.57614	1.45885	1.11608	1.81127	1.35827	0.922931	2.11112
	T_39102_c4_g2	N	gi|351721352|ref|NP_001238486.1| superoxide dismutase [Fe], chloroplastic precursor [Glycine max] 1.1e-139	GO:0004784, superoxide dismutase activity;GO:0009507, chloroplast;GO:0046872, metal ion binding	K04564-ko04146 Peroxisome;ko04068 FoxO signaling pathway;ko04013 MAPK signaling pathway - fly	15.9593	11.7214	69.8648	8.08612	5.32363	5.02007	15.2647	12.9964	9.18602	44.2429	10.0388	6.56482	11.5556	22.3472	5.31623	42.5865	14.6627	15.0549
	T_39374_c0_g4	N	gi|3914998|sp|O04996.3|SODC_SOLCS RecName: Full=Superoxide dismutase [Cu-Zn] 7.9e-44	GO:0004784, superoxide dismutase activity;GO:0005507, copper ion binding;GO:0005737, cytoplasm;GO:0008270, zinc ion binding;GO:0019430, removal of superoxide radicals;GO:0046872, metal ion binding	-	0.253991	1.49353	0	2.12495	0.177154	0.151753	0.811987	2.29788	0.468124	2.82766	0	1.81089	0.082596	1.00879	1.89307	0.342567	1.50019	0.399177
	T_41561_c3_g1	N	gi|571564643|ref|XP_006605648.1| PREDICTED: superoxide dismutase [Fe] 3, chloroplastic isoform X1 [Glycine max] 8.3e-154	GO:0004784, superoxide dismutase activity;GO:0009295, nucleoid;GO:0009507, chloroplast;GO:0009534, chloroplast thylakoid;GO:0009579, thylakoid;GO:0042644, chloroplast nucleoid;GO:0042646, plastid nucleoid;GO:0046872, metal ion binding;GO:0055114, oxidation-reduction process	K04564-ko04146 Peroxisome;ko04068 FoxO signaling pathway;ko04013 MAPK signaling pathway - fly	2.01194	3.70501	2.13369	1.46951	2.50055	5.32423	2.9979	2.54005	2.81688	2.85896	1.4603	2.44643	1.6202	1.84027	2.02425	1.58343	1.31146	1.67412
	T_42336_c1_g2	Y	gi|734392597|gb|KHN27704.1| Superoxide dismutase [Cu-Zn], chloroplastic [Glycine soja] 2.0e-81	GO:0004784, superoxide dismutase activity;GO:0009507, chloroplast;GO:0046872, metal ion binding;GO:0071486, cellular response to high light intensity	K04565-ko04146 Peroxisome	7.96481	12.634	7.59052	13.1535	26.5349	18.318	17.07	14.5153	25.4477	10.2413	14.4823	16.137	20.5391	18.1432	19.8352	11.5439	20.1989	17.8541
	T_42336_c1_g4	N	gi|356542678|ref|XP_003539793.1| PREDICTED: superoxide dismutase [Cu-Zn], chloroplastic [Glycine max] 4.7e-23	GO:0004784, superoxide dismutase activity;GO:0009507, chloroplast;GO:0016021, integral component of membrane;GO:0046872, metal ion binding;GO:0071486, cellular response to high light intensity	-	27.0612	30.4886	20.1946	26.9242	40.2753	33.956	25.4962	25.2709	32.9432	21.9498	29.9249	33.6958	37.1796	36.8556	39.6842	20.1297	29.9253	41.0924
	T_42924_c2_g1	N	gi|571453327|ref|XP_006579476.1| PREDICTED: Cu/Zn-superoxide dismutase copper chaperone isoform X1 [Glycine max] 1.7e-44	GO:0004784, superoxide dismutase activity;GO:0005507, copper ion binding;GO:0005737, cytoplasm;GO:0005829, cytosol;GO:0006878, cellular copper ion homeostasis;GO:0008270, zinc ion binding;GO:0009507, chloroplast;GO:0009570, chloroplast stroma;GO:0016532, superoxide dismutase copper chaperone activity;GO:0019430, removal of superoxide radicals;GO:0030001, metal ion transport;GO:0055114, oxidation-…	-	19.1964	19.0093	14.555	15.1632	20.3493	22.12	19.1581	17.9651	18.5164	14.7787	19.4163	15.3931	15.7127	19.0964	16.7914	14.6202	17.3967	19.0303
	T_43411_c2_g1	N	gi|351726054|ref|NP_001235066.1| MnSOD [Glycine max] 4.9e-127	GO:0004784, superoxide dismutase activity;GO:0005759, mitochondrial matrix;GO:0046872, metal ion binding	K04564-ko04146 Peroxisome;ko04068 FoxO signaling pathway;ko04013 MAPK signaling pathway - fly	155.291	173.893	180.022	125.322	180.776	172.405	143.098	143.962	142.902	134.748	148.021	160.584	137.729	143.381	127.503	140.752	167.219	168.348
CAT	T_39882_c1_g1	N	gi|641453899|gb|AIA61608.1| catalase [Gynostemma pentaphyllum] 2.2e-06	GO:0004096, catalase activity;GO:0006979, response to oxidative stress;GO:0009514, glyoxysome;GO:0020037, heme binding;GO:0042744, hydrogen peroxide catabolic process;GO:0046872, metal ion binding	-	2.54164	0.897241	9.54765	0	0.66171	0.845525	1.16122	1.23995	0.110221	0.393579	4.25769	0.924614	0.645917	1.45298	0.183786	0.789095	0.61594	1.58912
	T_39882_c1_g2	N	gi|351734412|ref|NP_001235974.1| catalase-3 [Glycine max] 2.4e-237	GO:0004096, catalase activity;GO:0005737, cytoplasm;GO:0006979, response to oxidative stress;GO:0009514, glyoxysome;GO:0020037, heme binding;GO:0042542, response to hydrogen peroxide;GO:0042744, hydrogen peroxide catabolic process;GO:0046872, metal ion binding	K03781-ko04011 MAPK signaling pathway - yeast;ko01200 Carbon metabolism;ko00630 Glyoxylate and dicarboxylate metabolism;ko04146 Peroxisome;ko00380 Tryptophan metabolism;ko04068 FoxO signaling pathway	146.604	176.327	145.957	175.681	148.02	163.262	190.541	185.78	282.932	194.358	187.977	196.602	240.767	291.835	228.939	200.025	201.456	195.657
	T_41894_c3_g1	N	gi|326498909|dbj|BAK02440.1| predicted protein [Hordeum vulgare subsp. vulgare] 4.3e-297	GO:0004096, catalase activity;GO:0005737, cytoplasm;GO:0006979, response to oxidative stress;GO:0020037, heme binding;GO:0042744, hydrogen peroxide catabolic process;GO:0046872, metal ion binding	-	0.046324	0.0796402	0	3.03002	0	0.168506	0.160795	0.0942033	0.290501	2.13643	0.123891	1.85133	0.0842517	0.433064	3.91486	1.66254	0.446326	0.0686276
	T_42036_c0_g2	N	gi|593794847|ref|XP_007160462.1| hypothetical protein PHAVU_002G324100g [Phaseolus vulgaris] 4.7e-18	GO:0004096, catalase activity;GO:0005622, intracellular;GO:0005777, peroxisome;GO:0006979, response to oxidative stress;GO:0008270, zinc ion binding;GO:0020037, heme binding;GO:0042744, hydrogen peroxide catabolic process;GO:0046872, metal ion binding	-	4.17614	3.00632	2.82717	2.07648	1.73846	2.21278	2.16977	3.67878	0.834245	1.73416	2.22952	1.435	1.4689	1.34102	1.51221	1.81252	1.02341	2.29039
APX	T_46318_c1_g1	N	gi|315308158|gb|ADU04478.1| ascorbate peroxidase [Ananas comosus] 1.1e-07	GO:0004601, peroxidase activity;GO:0005737, cytoplasm;GO:0006979, response to oxidative stress;GO:0016688, L-ascorbate peroxidase activity;GO:0020037, heme binding;GO:0042744, hydrogen peroxide catabolic process;GO:0046872, metal ion binding	-	67.4797	74.7963	38.1567	26.8255	24.4059	51.6045	26.5436	18.257	43.6474	16.7184	31.8773	61.4125	42.5329	30.1383	43.9143	15.0732	30.0269	47.9624
	T_41415_c0_g3	N	gi|955317910|ref|XP_014630470.1| PREDICTED: probable L-ascorbate peroxidase 6, chloroplastic isoform X3 [Glycine max] 9.6e-168	GO:0004601, peroxidase activity;GO:0005739, mitochondrion;GO:0006979, response to oxidative stress;GO:0009507, chloroplast;GO:0009570, chloroplast stroma;GO:0009735, response to cytokinin;GO:0016020, membrane;GO:0016688, L-ascorbate peroxidase activity;GO:0020037, heme binding;GO:0042744, hydrogen peroxide catabolic process;GO:0046872, metal ion binding	K00434-ko00480 Glutathione metabolism;ko00053 Ascorbate and aldarate metabolism	31.3162	43.0144	38.5738	50.4104	60.9096	66.1686	71.6361	66.1784	60.7439	67.7137	37.722	36.6583	54.1272	77.2644	35.3309	60.1988	45.0931	43.0622
	T_44625_c2_g3	Y	gi|393717547|gb|AFN21427.1| ascorbate peroxidase [Macrotyloma uniflorum] 1.8e-61	GO:0004601, peroxidase activity;GO:0005737, cytoplasm;GO:0006979, response to oxidative stress;GO:0016688, L-ascorbate peroxidase activity;GO:0020037, heme binding;GO:0042744, hydrogen peroxide catabolic process;GO:0046872, metal ion binding	K00434-ko00480 Glutathione metabolism;ko00053 Ascorbate and aldarate metabolism	853.611	1241.25	1233.25	1541.9	1742.15	1699.47	2094.67	1925.72	3027.55	1837.44	2167.02	1909.07	1873.94	2858.58	2238.82	1661.64	1762.97	1525.15
	T_46663_c1_g2	N	gi|947077567|gb|KRH26407.1| hypothetical protein GLYMA_12G172200 [Glycine max] 4.0e-21	GO:0004601, peroxidase activity;GO:0005829, cytosol;GO:0006979, response to oxidative stress;GO:0009845, seed germination;GO:0010431, seed maturation;GO:0016688, L-ascorbate peroxidase activity;GO:0020037, heme binding;GO:0042744, hydrogen peroxide catabolic process;GO:0046872, metal ion binding	-	9.17188	5.495	8.31375	2.49308	2.59075	4.81109	3.97577	2.82375	2.86292	4.04474	5.57763	6.5082	2.7781	3.5605	5.12785	4.62906	2.43554	6.0743
GPX	T_37193_c0_g1	N	gi|1012354433|gb|KYP65620.1| putative phospholipid hydroperoxide glutathione peroxidase [Cajanus cajan] 1.7e-25	GO:0004602, glutathione peroxidase activity;GO:0005737, cytoplasm;GO:0006979, response to oxidative stress;GO:0047066, phospholipid-hydroperoxide glutathione peroxidase activity	-	117.633	113.243	114.557	73.3188	90.696	85.1149	82.4295	78.8822	77.1845	77.8014	97.3841	86.9628	82.9852	78.6924	80.8089	106.613	98.5089	128.534
	T_37486_c0_g1	N	gi|868989905|gb|AKP06209.1| glutathione peroxidase, partial [Eurya emarginata] 1.5e-75	GO:0004602, glutathione peroxidase activity;GO:0005622, intracellular;GO:0005758, mitochondrial intermembrane space;GO:0005782, peroxisomal matrix;GO:0006979, response to oxidative stress;GO:0034599, cellular response to oxidative stress;GO:0047066, phospholipid-hydroperoxide glutathione peroxidase activity;GO:0051920, peroxiredoxin activity	K00432-ko00480 Glutathione metabolism;ko00590 Arachidonic acid metabolism	0.0811284	0.0680118	0	0.330767	0	0.314539	0	0.274243	0.0687888	0.510952	0.0772031	0.557064	0	0.965348	0.608486	0.139021	0.775049	0.446485
	T_33509_c0_g1	N	gi|868989905|gb|AKP06209.1| glutathione peroxidase, partial [Eurya emarginata] 8.6e-70	GO:0004602, glutathione peroxidase activity;GO:0005622, intracellular;GO:0005758, mitochondrial intermembrane space;GO:0005782, peroxisomal matrix;GO:0006979, response to oxidative stress;GO:0034599, cellular response to oxidative stress;GO:0047066, phospholipid-hydroperoxide glutathione peroxidase activity;GO:0051920, peroxiredoxin activity	K00432-ko00480 Glutathione metabolism;ko00590 Arachidonic acid metabolism	0.450279	0.0755002	0.275268	1.83583	0.377141	0	0	0.382009	0.431201	0.568892	0	0	0	0	0.25943	0	0	0.14142
	T_40979_c0_g4	N	gi|955333886|ref|XP_014634113.1| PREDICTED: probable glutathione peroxidase 8 isoform X2 [Glycine max] 9.6e-57	GO:0004601, peroxidase activity;GO:0004602, glutathione peroxidase activity;GO:0005634, nucleus;GO:0005829, cytosol;GO:0006979, response to oxidative stress	-	27.9883	19.5673	19.5248	15.9473	22.2638	21.5123	21.7484	22.1267	16.6634	18.1411	16.4763	15.126	19.4471	24.7619	20.8148	18.397	23.4041	31.5399
	T_40979_c0_g5	N	gi|593794031|ref|XP_007160054.1| hypothetical protein PHAVU_002G288800g [Phaseolus vulgaris] 8.5e-15	GO:0004601, peroxidase activity;GO:0004602, glutathione peroxidase activity;GO:0005634, nucleus;GO:0005829, cytosol;GO:0006979, response to oxidative stress	-	0.5794	0.833264	0	0	0.610962	0.420146	0	0.246425	0	0.391112	0.41358	0.87134	0.427054	1.1551	0.250645	0.148927	0.122433	0.112808
	T_40979_c0_g3	N	gi|1012356094|gb|KYP67281.1| putative glutathione peroxidase 8, partial [Cajanus cajan] 1.3e-52	GO:0004601, peroxidase activity;GO:0004602, glutathione peroxidase activity;GO:0005634, nucleus;GO:0005829, cytosol;GO:0006979, response to oxidative stress	-	119.048	103.095	92.3813	102.596	107.583	90.0718	97.8943	115.758	114.803	121.481	140.583	105.934	115.957	139.333	126.331	122.467	107.573	146.271
	T_36438_c0_g1	N	gi|868989905|gb|AKP06209.1| glutathione peroxidase, partial [Eurya emarginata] 6.4e-57	GO:0004602, glutathione peroxidase activity;GO:0005622, intracellular;GO:0005758, mitochondrial intermembrane space;GO:0005782, peroxisomal matrix;GO:0006979, response to oxidative stress;GO:0034599, cellular response to oxidative stress;GO:0047066, phospholipid-hydroperoxide glutathione peroxidase activity;GO:0051920, peroxiredoxin activity	K00432-ko00480 Glutathione metabolism;ko00590 Arachidonic acid metabolism	1.3761	0.538399	0.987403	0.517029	0.452195	0	0.414815	1.42792	0	0.268745	3.33344	7.36509	0	0	0	0	0	0.676784
	T_42550_c0_g1	N	gi|1012320038|gb|KYP32893.1| hypothetical protein KK1_046315 [Cajanus cajan] 1.2e-51	GO:0004602, glutathione peroxidase activity;GO:0006979, response to oxidative stress;GO:0009570, chloroplast stroma;GO:0047066, phospholipid-hydroperoxide glutathione peroxidase activity	K00432-ko00480 Glutathione metabolism;ko00590 Arachidonic acid metabolism	12.3957	12.8837	12.5978	11.9785	14.8089	13.0859	15.0116	12.3286	13.6671	13.3351	13.7927	12.793	12.3426	17.8202	12.7804	12.2758	11.0651	14.3463
	T_41836_c1_g1	Y	gi|351727154|ref|NP_001236895.1| uncharacterized protein LOC100306570 [Glycine max] 1.6e-64	GO:0004602, glutathione peroxidase activity;GO:0005737, cytoplasm;GO:0006979, response to oxidative stress;GO:0047066, phospholipid-hydroperoxide glutathione peroxidase activity	K00432-ko00480 Glutathione metabolism;ko00590 Arachidonic acid metabolism	10.0984	10.6526	6.39179	11.2171	5.88606	2.03393	29.1692	21.8914	8.94906	13.003	7.442	10.1532	8.55311	28.6429	5.90123	28.7589	7.16465	22.381
	T_42820_c1_g1	Y	gi|965656290|dbj|BAT72709.1| hypothetical protein VIGAN_01014100 [Vigna angularis var. angularis] 1.2e-81	GO:0004602, glutathione peroxidase activity;GO:0005739, mitochondrion;GO:0005768, endosome;GO:0005794, Golgi apparatus;GO:0005802, trans-Golgi network;GO:0006979, response to oxidative stress;GO:0009738, abscisic acid-activated signaling pathway;GO:0042542, response to hydrogen peroxide;GO:0042631, cellular response to water deprivation	K00432-ko00480 Glutathione metabolism;ko00590 Arachidonic acid metabolism	118.981	61.2828	55.4769	24.1618	48.8607	43.0408	37.1617	45.8499	31.7507	29.5239	39.3916	25.0289	37.6837	28.5298	28.3958	50.1971	48.3815	75.6832
	T_39066_c4_g1	Y	gi|1012350152|gb|KYP61341.1| Retrovirus-related Pol polyprotein from transposon TNT 1-94 [Cajanus cajan] 3.0e-36	GO:0003676, nucleic acid binding;GO:0004602, glutathione peroxidase activity;GO:0005737, cytoplasm;GO:0006979, response to oxidative stress;GO:0015074, DNA integration;GO:0047066, phospholipid-hydroperoxide glutathione peroxidase activity	-	42.0969	29.8899	25.1926	18.0556	15.6881	20.3619	17.5518	21.0621	12.5902	15.4689	16.3611	14.7742	13.338	13.1953	13.3793	23.342	18.6391	29.1401
GST	T_35592_c0_g1	N	gi|951020488|ref|XP_014512405.1| PREDICTED: probable glutathione S-transferase [Vigna radiata var. radiata] 6.1e-115	GO:0004364, glutathione transferase activity;GO:0005737, cytoplasm;GO:0006749, glutathione metabolic process;GO:0009407, toxin catabolic process;GO:0009734, auxin-activated signaling pathway	K00799-ko00480 Glutathione metabolism;ko00980 Metabolism of xenobiotics by cytochrome P450;ko00982 Drug metabolism - cytochrome P450	5.47399	3.29101	3.28397	1.4758	1.95185	1.4913	0.715236	1.32105	0.559596	0.726887	0.997167	0.839483	2.43644	1.40705	1.38559	2.01928	1.73604	3.9475
	T_36236_c0_g1	N	gi|363806862|ref|NP_001242039.1| probable glutathione S-transferase GSTF1-like [Glycine max] 1.2e-80	GO:0004364, glutathione transferase activity;GO:0005737, cytoplasm;GO:0005829, cytosol;GO:0006749, glutathione metabolic process;GO:0009407, toxin catabolic process;GO:0009636, response to toxic substance	K00799-ko00480 Glutathione metabolism;ko00980 Metabolism of xenobiotics by cytochrome P450;ko00982 Drug metabolism - cytochrome P450	1.55172	4.64257	6.75118	2.47288	5.36984	9.53179	7.15418	2.7766	6.9814	2.41157	0.619247	4.76609	5.641	4.16557	0.600554	1.60535	5.70317	5.1908
	T_38445_c0_g3	N	gi|1021551906|ref|XP_016167308.1| PREDICTED: glutathione S-transferase F9-like [Arachis ipaensis] 8.9e-07	GO:0016740, transferase activity	-	0.954714	1.08582	0.210177	0.698206	0.526353	1.23338	0.391911	0.348538	0.714759	0.310604	0.195997	0.323804	0.366138	0.339731	0.205598	0	0.264024	0.0815394
	T_39034_c2_g8	N	gi|951004673|ref|XP_014507928.1| PREDICTED: glutathione S-transferase U17-like [Vigna radiata var. radiata] 8.8e-124	GO:0004364, glutathione transferase activity;GO:0005737, cytoplasm;GO:0005829, cytosol;GO:0006749, glutathione metabolic process;GO:0009407, toxin catabolic process;GO:0009507, chloroplast;GO:0009636, response to toxic substance;GO:0009651, response to salt stress;GO:0009704, de-etiolation;GO:0040008, regulation of growth;GO:0048527, lateral root development;GO:0060416, response to growth hormone…	K00799-ko00480 Glutathione metabolism;ko00980 Metabolism of xenobiotics by cytochrome P450;ko00982 Drug metabolism - cytochrome P450	16.0055	16.642	10.8048	18.0393	20.4866	19.6927	29.4855	27.2614	22.7183	20.6888	29.2979	14.3345	16.9611	21.1693	44.6055	21.1199	19.1651	31.0264
	T_40064_c1_g2	Y	gi|1012344782|gb|KYP55974.1| putative glutathione S-transferase [Cajanus cajan] 8.0e-105	GO:0004364, glutathione transferase activity;GO:0005737, cytoplasm;GO:0006749, glutathione metabolic process;GO:0009407, toxin catabolic process	K00799-ko00480 Glutathione metabolism;ko00980 Metabolism of xenobiotics by cytochrome P450;ko00982 Drug metabolism - cytochrome P450	0.720285	0.047051	0.169522	1.32734	0.866218	0.376313	1.2694	1.92406	0.276206	2.45409	0.738174	0.190131	1.40043	5.87541	1.90032	9.50929	3.59093	3.89204
	T_40463_c1_g1	N	gi|1012333405|gb|KYP44800.1| Glutathione S-transferase [Cajanus cajan] 4.6e-37	GO:0004364, glutathione transferase activity;GO:0004601, peroxidase activity;GO:0005634, nucleus;GO:0005774, vacuolar membrane;GO:0005829, cytosol;GO:0006749, glutathione metabolic process;GO:0006952, defense response;GO:0009407, toxin catabolic process;GO:0009409, response to cold;GO:0009507, chloroplast;GO:0009570, chloroplast stroma;GO:0009579, thylakoid;GO:0009651, response to salt stress;GO:…	-	1.43759	2.08803	0.816708	0.200823	0.432483	1.3561	0.65905	0.639291	1.27759	0.459789	1.03377	0.850222	0.710846	1.12151	1.14833	0.436221	1.01257	1.62502
	T_41137_c0_g5	N	gi|356496394|ref|XP_003517053.1| PREDICTED: glutathione S-transferase zeta class isoform X1 [Glycine max] 7.8e-110	GO:0004364, glutathione transferase activity;GO:0005737, cytoplasm;GO:0009072, aromatic amino acid family metabolic process;GO:0016740, transferase activity	K01800-ko00350 Tyrosine metabolism;ko00643 Styrene degradation	5.3812	4.83091	3.67829	4.09786	4.36941	3.20955	3.71795	5.60548	3.34553	3.25145	4.55598	2.33049	4.14083	3.40031	4.20973	4.91766	5.78178	9.21186
	T_41293_c8_g1	N	gi|734438150|gb|KHN48964.1| Putative glutathione S-transferase [Glycine soja] 2.1e-108	GO:0004364, glutathione transferase activity;GO:0005737, cytoplasm;GO:0006749, glutathione metabolic process;GO:0009407, toxin catabolic process	K00799-ko00480 Glutathione metabolism;ko00980 Metabolism of xenobiotics by cytochrome P450;ko00982 Drug metabolism - cytochrome P450	0.845335	0.643064	0.0594676	0.838276	0.182402	0.28287	0.835422	0.988036	0.316064	0.429872	0.887906	0.450268	0.513455	0.635857	0.400128	1.46202	0.546857	0.625744
	T_41293_c8_g2	N	gi|734438150|gb|KHN48964.1| Putative glutathione S-transferase [Glycine soja] 1.5e-104	GO:0004364, glutathione transferase activity;GO:0005737, cytoplasm;GO:0006749, glutathione metabolic process;GO:0009407, toxin catabolic process	K00799-ko00480 Glutathione metabolism;ko00980 Metabolism of xenobiotics by cytochrome P450;ko00982 Drug metabolism - cytochrome P450	4.13059	2.35824	2.13152	0.931139	1.46751	1.36774	1.39019	1.72813	1.59898	0.83488	1.06363	0.91705	1.41607	1.733	1.08262	1.99608	1.20262	3.57069
	T_42081_c3_g1	Y	gi|571481699|ref|XP_006588742.1| PREDICTED: glutathione S-transferase L3 isoform X1 [Glycine max] 6.0e-29	GO:0004364, glutathione transferase activity;GO:0005737, cytoplasm;GO:0006749, glutathione metabolic process;GO:0010731, protein glutathionylation	-	135.731	159.374	161.278	359.466	377.538	236.698	445.947	463.866	360.436	776.112	266.039	153.07	364.734	520.455	231.853	520.06	409.942	264.839
	T_42081_c3_g2	Y	gi|950954070|ref|XP_014496329.1| PREDICTED: glutathione S-transferase L3 [Vigna radiata var. radiata] 1.7e-44	GO:0004364, glutathione transferase activity;GO:0005829, cytosol;GO:0006749, glutathione metabolic process;GO:0009636, response to toxic substance;GO:0010731, protein glutathionylation;GO:0046686, response to cadmium ion	K00799-ko00480 Glutathione metabolism;ko00980 Metabolism of xenobiotics by cytochrome P450;ko00982 Drug metabolism - cytochrome P450	0.320515	0	0.858951	1.54092	0.517385	1.05356	3.55077	2.03294	0.478861	5.33324	1.7092	0.581066	2.5499	9.0962	1.82111	15.2203	5.7977	2.94161
	T_42239_c2_g2	N	gi|1012353926|gb|KYP65114.1| putative glutathione S-transferase [Cajanus cajan] 1.2e-52	GO:0004364, glutathione transferase activity;GO:0005737, cytoplasm;GO:0005829, cytosol;GO:0006749, glutathione metabolic process;GO:0009407, toxin catabolic process;GO:0009636, response to toxic substance	-	36.5352	35.3084	23.0722	29.9728	45.5799	39.9607	55.1171	55.6611	32.1843	27.5015	44.2486	21.6494	61.9927	25.3301	86.6029	25.4972	45.4657	99.9918
	T_42307_c2_g3	Y	gi|1012349539|gb|KYP60729.1| putative glutathione S-transferase, partial [Cajanus cajan] 6.3e-50	GO:0004364, glutathione transferase activity;GO:0004462, lactoylglutathione lyase activity;GO:0009734, auxin-activated signaling pathway	-	13.5547	9.44892	10.7074	113.122	134.642	86.7305	86.9811	104.307	107.478	268.421	29.0782	10.2143	139.841	249.297	26.6377	254.544	134.287	75.5799
	T_42480_c0_g1	Y	gi|959092822|ref|NP_001304429.1| glutathione S-transferase F9-like [Glycine max] 2.1e-42	GO:0004364, glutathione transferase activity;GO:0004602, glutathione peroxidase activity;GO:0005507, copper ion binding;GO:0005737, cytoplasm;GO:0005773, vacuole;GO:0005829, cytosol;GO:0005886, plasma membrane;GO:0006749, glutathione metabolic process;GO:0006952, defense response;GO:0009407, toxin catabolic process;GO:0009506, plasmodesma;GO:0009507, chloroplast;GO:0009570, chloroplast stroma;GO:…	-	69.2158	82.0149	67.6161	34.5753	44.7899	37.4557	61.7965	65.4389	28.8818	49.3242	51.028	35.3596	33.0646	35.2956	35.0015	49.5038	49.9203	54.0705
	T_42480_c0_g2	Y	gi|1012322705|gb|KYP34960.1| Glutathione S-transferase ERD13 [Cajanus cajan] 1.2e-50	GO:0004364, glutathione transferase activity;GO:0004602, glutathione peroxidase activity;GO:0005507, copper ion binding;GO:0005737, cytoplasm;GO:0005773, vacuole;GO:0005829, cytosol;GO:0005886, plasma membrane;GO:0006749, glutathione metabolic process;GO:0006952, defense response;GO:0009407, toxin catabolic process;GO:0009506, plasmodesma;GO:0009507, chloroplast;GO:0009570, chloroplast stroma;GO:…	K00799-ko00480 Glutathione metabolism;ko00980 Metabolism of xenobiotics by cytochrome P450;ko00982 Drug metabolism - cytochrome P450	14.6566	21.866	14.5575	2.81776	6.47786	3.02035	11.0031	9.90714	3.99821	5.89639	18.6151	6.36642	4.55976	6.26107	7.12458	6.67876	6.84799	12.4191
	T_42948_c1_g1	N	gi|751368117|ref|NP_001291447.1| glutathione S-transferase TCHQD-like [Glycine max] 2.6e-100	GO:0004364, glutathione transferase activity;GO:0005737, cytoplasm;GO:0005886, plasma membrane;GO:0006749, glutathione metabolic process;GO:0009636, response to toxic substance	-	3.43597	5.06676	4.03868	0.205452	0.947823	1.0521	3.11461	1.20515	1.02157	1.88766	3.57518	0.618171	1.42688	1.84359	0.831695	4.24442	7.6128	14.6692
	T_42948_c1_g2	N	gi|959092678|ref|NP_001304610.1| glutathione S-transferase TCHQD-like [Glycine max] 2.1e-145	GO:0004364, glutathione transferase activity;GO:0005737, cytoplasm;GO:0005886, plasma membrane;GO:0006749, glutathione metabolic process;GO:0009636, response to toxic substance	-	4.91131	2.94146	2.55326	1.90341	2.6926	2.78012	2.72967	3.37001	3.2003	1.28866	1.52231	2.44371	1.69664	2.35266	0.556027	2.37673	0.820379	1.65168
	T_43045_c0_g2	Y	gi|748303041|gb|AJE59679.1| tau class glutathione S-transferase [Glycine max] 1.0e-122	GO:0004364, glutathione transferase activity;GO:0005737, cytoplasm;GO:0006749, glutathione metabolic process;GO:0009407, toxin catabolic process;GO:0009734, auxin-activated signaling pathway	K00799-ko00480 Glutathione metabolism;ko00980 Metabolism of xenobiotics by cytochrome P450;ko00982 Drug metabolism - cytochrome P450	24.116	22.0482	19.0866	509.283	340.892	183.494	291.181	368.561	300.508	1433.91	47.4975	49.9551	480.13	1352.26	30.173	1302.94	367.678	159.013
	T_43045_c0_g4	Y	gi|1012325906|gb|KYP37760.1| putative glutathione S-transferase parC [Cajanus cajan] 1.2e-32	GO:0004364, glutathione transferase activity;GO:0005737, cytoplasm;GO:0005829, cytosol;GO:0006749, glutathione metabolic process;GO:0009407, toxin catabolic process;GO:0009636, response to toxic substance	-	13.6284	19.7624	9.96115	120.477	93.7108	71.565	76.1505	152.202	36.0313	215.186	20.9778	16.6174	110.746	144.963	16.4922	171.084	76.437	77.2567
	T_43213_c1_g2	N	gi|502110992|ref|XP_004493929.1| PREDICTED: glutathione S-transferase L1-like isoform X2 [Cicer arietinum] 7.0e-52	GO:0004364, glutathione transferase activity;GO:0005737, cytoplasm;GO:0005829, cytosol;GO:0006749, glutathione metabolic process;GO:0009636, response to toxic substance;GO:0010731, protein glutathionylation	K00799-ko00480 Glutathione metabolism;ko00980 Metabolism of xenobiotics by cytochrome P450;ko00982 Drug metabolism - cytochrome P450	118.892	54.3971	44.3417	58.6071	64.2519	53.9765	60.0281	94.8783	70.8677	103.369	84.9331	33.5812	105.068	79.9448	78.6326	104.045	103.92	141.88
	T_43213_c1_g3	N	gi|950954070|ref|XP_014496329.1| PREDICTED: glutathione S-transferase L3 [Vigna radiata var. radiata] 6.5e-28	GO:0004364, glutathione transferase activity;GO:0005737, cytoplasm;GO:0005829, cytosol;GO:0006749, glutathione metabolic process;GO:0009636, response to toxic substance;GO:0010731, protein glutathionylation	-	33.5479	22.9631	21.6006	28.1631	14.5572	16.1322	25.2688	28.5567	18.8722	32.1558	21.9433	16.8764	23.1485	39.2717	20.4347	32.2353	23.9364	25.5539
	T_43213_c1_g4	Y	gi|748302949|gb|AJE59633.1| lambda class glutathione S-transferase [Glycine max] 1.8e-20	GO:0004364, glutathione transferase activity;GO:0005829, cytosol;GO:0006749, glutathione metabolic process;GO:0009636, response to toxic substance;GO:0010731, protein glutathionylation;GO:0046686, response to cadmium ion	-	12.948	25.0343	14.1324	95.6644	83.5788	50.8755	162.509	109.954	80.6133	74.7868	58.2013	18.6258	20.4106	63.8942	13.2256	20.9427	12.5067	8.29075
	T_43479_c1_g1	N	gi|734352596|gb|KHN13182.1| Glutathione S-transferase F9 [Glycine soja] 5.5e-31	GO:0004364, glutathione transferase activity;GO:0004602, glutathione peroxidase activity;GO:0005507, copper ion binding;GO:0005737, cytoplasm;GO:0005773, vacuole;GO:0005829, cytosol;GO:0005886, plasma membrane;GO:0006749, glutathione metabolic process;GO:0006952, defense response;GO:0009407, toxin catabolic process;GO:0009506, plasmodesma;GO:0009507, chloroplast;GO:0009570, chloroplast stroma;GO:…	-	157.788	132.507	94.9532	109.965	136.387	105.585	130.602	152.382	72.1457	101.074	78.7136	76.78	90.5397	100.402	83.2568	155.715	111.107	168.144
	T_43479_c1_g3	N	gi|734352595|gb|KHN13181.1| Glutathione S-transferase F9 [Glycine soja] 8.5e-83	GO:0004364, glutathione transferase activity;GO:0005507, copper ion binding;GO:0005618, cell wall;GO:0005737, cytoplasm;GO:0005773, vacuole;GO:0005829, cytosol;GO:0005886, plasma membrane;GO:0006749, glutathione metabolic process;GO:0009407, toxin catabolic process;GO:0009414, response to water deprivation;GO:0009507, chloroplast;GO:0009636, response to toxic substance;GO:0043295, glutathione bin…	K00799-ko00480 Glutathione metabolism;ko00980 Metabolism of xenobiotics by cytochrome P450;ko00982 Drug metabolism - cytochrome P450	111.149	100.493	87.3885	63.2834	109.23	95.8865	90.2067	100.754	76.6104	48.113	51.6336	60.3291	68.7208	64.1199	45.4257	35.4099	56.7443	58.6032
	T_43933_c2_g3	N	gi|351725185|ref|NP_001235036.1| glutathione S-transferase GST 25 [Glycine max] 1.8e-29	GO:0004364, glutathione transferase activity;GO:0004601, peroxidase activity;GO:0005737, cytoplasm;GO:0005829, cytosol;GO:0006749, glutathione metabolic process;GO:0009072, aromatic amino acid family metabolic process;GO:0009407, toxin catabolic process;GO:0016034, maleylacetoacetate isomerase activity;GO:0016740, transferase activity;GO:0016853, isomerase activity;GO:1902000, homogentisate catab…	-	26.5681	20.4493	18.3426	15.8697	17.9652	17.6687	17.6801	16.9208	16.9605	14.2308	14.7215	15.2994	18.6321	17.2418	13.3686	15.9868	16.5451	19.4866
	T_44018_c0_g2	N	gi|1012349533|gb|KYP60723.1| putative glutathione S-transferase [Cajanus cajan] 5.2e-107	GO:0004364, glutathione transferase activity;GO:0005737, cytoplasm;GO:0005829, cytosol;GO:0006749, glutathione metabolic process;GO:0009407, toxin catabolic process;GO:0009636, response to toxic substance;GO:0009751, response to salicylic acid;GO:0016740, transferase activity	K00799-ko00480 Glutathione metabolism;ko00980 Metabolism of xenobiotics by cytochrome P450;ko00982 Drug metabolism - cytochrome P450	0.368488	1.05672	0.450739	0.441642	0.307977	1.21473	0.141116	0.374848	1.24889	1.26462	0.490944	0.505978	1.65147	3.36375	0.316548	2.37854	1.44283	1.79822
	T_44065_c0_g1	Y	gi|748303023|gb|AJE59670.1| tau class glutathione S-transferase [Glycine max] 1.4e-103	GO:0004364, glutathione transferase activity;GO:0005737, cytoplasm;GO:0005829, cytosol;GO:0006749, glutathione metabolic process;GO:0009407, toxin catabolic process;GO:0009636, response to toxic substance;GO:0009751, response to salicylic acid;GO:0016740, transferase activity	K00799-ko00480 Glutathione metabolism;ko00980 Metabolism of xenobiotics by cytochrome P450;ko00982 Drug metabolism - cytochrome P450	12.9564	15.8312	13.2401	17.8242	9.52778	10.0548	15.7149	21.8329	7.54737	23.7727	17.2782	10.661	16.0305	26.5516	9.45341	43.6729	18.3691	23.3975
	T_44065_c0_g2	Y	gi|959092300|ref|NP_001304557.1| probable glutathione S-transferase [Glycine max] 3.9e-61	GO:0004364, glutathione transferase activity;GO:0006952, defense response;GO:0016740, transferase activity	-	20.0594	28.6967	34.1677	53.7088	38.4454	32.5306	46.326	58.4536	40.8716	82.3084	43.3687	27.2548	53.6738	118.531	22.3065	92.6365	50.2023	48.4859
	T_44254_c0_g1	Y	gi|1012325906|gb|KYP37760.1| putative glutathione S-transferase parC [Cajanus cajan] 3.4e-39	GO:0004364, glutathione transferase activity;GO:0009734, auxin-activated signaling pathway	-	48.8651	22.4482	18.3329	185.39	136.961	85.6546	91.1332	135.193	50.3981	223.709	17.3112	20.7545	148.793	182.413	23.7558	237.345	114.436	142.894
	T_44285_c0_g2	N	gi|351727365|ref|NP_001237670.1| glutathione S-transferase GST 11 [Glycine max] 1.3e-38	GO:0004364, glutathione transferase activity;GO:0005737, cytoplasm;GO:0006749, glutathione metabolic process;GO:0009407, toxin catabolic process	K00799-ko00480 Glutathione metabolism;ko00980 Metabolism of xenobiotics by cytochrome P450;ko00982 Drug metabolism - cytochrome P450	105.539	73.7462	90.1061	49.7233	75.4159	62.6945	85.3428	81.2131	38.6588	46.2079	46.8697	56.902	64.7488	55.1422	74.724	65.311	45.6684	79.5418
	T_44840_c1_g1	N	gi|734382520|gb|KHN23652.1| Glutathione S-transferase T1 [Glycine soja] 2.7e-90	GO:0004364, glutathione transferase activity;GO:0004601, peroxidase activity;GO:0005634, nucleus;GO:0005737, cytoplasm;GO:0005777, peroxisome;GO:0006749, glutathione metabolic process;GO:0009407, toxin catabolic process	K00799-ko00480 Glutathione metabolism;ko00980 Metabolism of xenobiotics by cytochrome P450;ko00982 Drug metabolism - cytochrome P450	48.8286	39.1539	41.6971	31.8248	35.0643	34.7307	40.6008	38.6933	26.4909	28.7089	30.4043	26.1968	26.6841	23.8381	31.2489	26.7269	27.9811	28.993
	T_45011_c0_g2	N	gi|1012349541|gb|KYP60731.1| putative glutathione S-transferase [Cajanus cajan] 1.6e-51	GO:0004364, glutathione transferase activity;GO:0009734, auxin-activated signaling pathway	-	388.467	248.956	163.209	459.345	434.73	300.618	362.356	463.282	319.055	365.487	207.788	101.77	314.274	293.679	248.964	277.303	221.94	250.337
	T_45011_c0_g6	Y	gi|11385445|gb|AAG34805.1|AF243370_1 glutathione S-transferase GST 15, partial [Glycine max] 6.6e-43	GO:0004364, glutathione transferase activity;GO:0006952, defense response	-	3.30431	3.80214	2.85584	21.4864	27.4814	20.6799	20.7921	23.5373	26.6232	55.0386	6.55182	2.78709	36.108	61.9849	7.74793	57.0699	20.1977	29.481
	T_45905_c3_g7	N	gi|351727831|ref|NP_001237686.1| glutathione S-transferase GST 16 [Glycine max] 1.8e-29	GO:0004364, glutathione transferase activity;GO:0009734, auxin-activated signaling pathway	-	2.84135	2.26449	1.92852	2.29288	0.679886	0.950919	3.46102	3.39269	1.57423	3.11328	1.5083	2.45356	0.316493	1.90864	1.39013	1.00591	0.529628	3.86164
	T_45949_c3_g1	N	gi|1012331523|gb|KYP42994.1| putative glutathione S-transferase GSTU6 [Cajanus cajan] 7.3e-110	GO:0004364, glutathione transferase activity;GO:0005737, cytoplasm;GO:0005829, cytosol;GO:0006749, glutathione metabolic process;GO:0009407, toxin catabolic process;GO:0009507, chloroplast;GO:0009636, response to toxic substance;GO:0009651, response to salt stress;GO:0009704, de-etiolation;GO:0040008, regulation of growth;GO:0048527, lateral root development;GO:0060416, response to growth hormone…	K00799-ko00480 Glutathione metabolism;ko00980 Metabolism of xenobiotics by cytochrome P450;ko00982 Drug metabolism - cytochrome P450	0.800178	0.538661	0.440432	0.191844	0.33466	0.124651	1.07926	0.135706	0.215825	0.216734	0.0611507	0.137358	0.15604	0.555999	0.566891	0.226778	0	0.522883
	T_45960_c0_g3	N	gi|289467887|gb|ADC95628.1| glutathione S-transferase [Bruguiera gymnorhiza] 3.4e-11	GO:0004364, glutathione transferase activity;GO:0005737, cytoplasm;GO:0005829, cytosol;GO:0006749, glutathione metabolic process;GO:0009407, toxin catabolic process;GO:0009636, response to toxic substance;GO:0016740, transferase activity;GO:0046256, 2,4,6-trinitrotoluene catabolic process	-	9.26991	5.84935	7.29213	15.1394	6.81788	13.6697	4.05355	8.39904	0	7.76615	6.01626	4.73339	18.1997	14.9619	2.80007	8.94273	24.4459	8.89886
	T_46130_c1_g3	N	gi|734392739|gb|KHN27766.1| Glutathione S-transferase 3 [Glycine soja] 9.1e-52	GO:0004364, glutathione transferase activity;GO:0005737, cytoplasm;GO:0006749, glutathione metabolic process;GO:0009407, toxin catabolic process	-	12.9067	13.4784	16.5644	15.4988	13.8823	10.4376	15.5879	15.4266	5.46566	10.4086	17.2892	13.0592	17.2272	14.8885	17.697	19.3526	10.7968	12.0821
	T_46203_c1_g2	N	gi|351723739|ref|NP_001234986.1| glutathione S-transferase GST 19 [Glycine max] 4.1e-51	GO:0004364, glutathione transferase activity;GO:0005737, cytoplasm;GO:0005829, cytosol;GO:0006749, glutathione metabolic process;GO:0009407, toxin catabolic process;GO:0009636, response to toxic substance;GO:0009751, response to salicylic acid	K00799-ko00480 Glutathione metabolism;ko00980 Metabolism of xenobiotics by cytochrome P450;ko00982 Drug metabolism - cytochrome P450	27.1049	24.7725	20.043	44.6043	41.8262	26.882	27.8094	33.2804	26.979	40.7249	22.1165	19.3344	41.7457	57.52	24.6887	51.4056	43.8852	39.6989
	T_46593_c1_g1	N	gi|1012353925|gb|KYP65113.1| putative glutathione S-transferase [Cajanus cajan] 2.3e-20	GO:0004364, glutathione transferase activity;GO:0005737, cytoplasm;GO:0006749, glutathione metabolic process;GO:0009407, toxin catabolic process	-	4.69741	8.16647	5.50866	12.203	3.63744	4.54068	8.36445	13.0446	2.6812	11.9198	4.94553	2.80793	5.63434	8.07296	4.17009	9.3086	3.4359	6.7122
	T_46593_c2_g1	Y	gi|1012325906|gb|KYP37760.1| putative glutathione S-transferase parC [Cajanus cajan] 2.1e-40	GO:0004364, glutathione transferase activity;GO:0005737, cytoplasm;GO:0005829, cytosol;GO:0006749, glutathione metabolic process;GO:0009407, toxin catabolic process;GO:0009636, response to toxic substance	-	29.6288	22.7059	17.3256	204.549	159.754	76.0412	92.6753	185.751	68.5425	276.824	21.5376	25.3566	142.251	170.484	22.438	281.2	120.72	93.5976
	T_46593_c5_g4	N	gi|351727831|ref|NP_001237686.1| glutathione S-transferase GST 16 [Glycine max] 2.6e-45	GO:0004364, glutathione transferase activity;GO:0005737, cytoplasm;GO:0006749, glutathione metabolic process;GO:0009407, toxin catabolic process;GO:0009734, auxin-activated signaling pathway	-	7.10374	9.46146	4.24107	5.38155	3.26097	6.84767	10.0353	11.1095	4.6146	6.94669	6.46737	4.77859	4.10253	9.39631	3.87852	14.3271	4.82532	9.48813
	T_46991_c0_g1	N	gi|951075242|ref|XP_014492829.1| PREDICTED: glutathione S-transferase F10-like [Vigna radiata var. radiata] 7.6e-65	GO:0004364, glutathione transferase activity;GO:0005507, copper ion binding;GO:0005618, cell wall;GO:0005737, cytoplasm;GO:0005773, vacuole;GO:0005829, cytosol;GO:0005886, plasma membrane;GO:0006749, glutathione metabolic process;GO:0009407, toxin catabolic process;GO:0009414, response to water deprivation;GO:0009507, chloroplast;GO:0009636, response to toxic substance;GO:0043295, glutathione bin…	K00799-ko00480 Glutathione metabolism;ko00980 Metabolism of xenobiotics by cytochrome P450;ko00982 Drug metabolism - cytochrome P450	178.97	162.644	127.57	176.503	193.19	131.817	194.255	216.35	111.707	127.962	131.803	99.5992	106.156	130.109	153.016	189.968	116.225	164.358
	T_46991_c2_g4	N	gi|959092822|ref|NP_001304429.1| glutathione S-transferase F9-like [Glycine max] 6.3e-39	GO:0004364, glutathione transferase activity;GO:0004602, glutathione peroxidase activity;GO:0005507, copper ion binding;GO:0005737, cytoplasm;GO:0005773, vacuole;GO:0005829, cytosol;GO:0005886, plasma membrane;GO:0006749, glutathione metabolic process;GO:0006952, defense response;GO:0009407, toxin catabolic process;GO:0009506, plasmodesma;GO:0009507, chloroplast;GO:0009570, chloroplast stroma;GO:…	-	28.1965	21.111	19.2242	16.116	11.5831	7.87584	26.1562	27.1069	8.30043	15.7702	13.4911	11.79	11.844	10.4884	9.63371	21.6696	24.532	29.0508
	T_46991_c2_g5	Y	gi|959092822|ref|NP_001304429.1| glutathione S-transferase F9-like [Glycine max] 2.4e-40	GO:0004364, glutathione transferase activity;GO:0004602, glutathione peroxidase activity;GO:0005507, copper ion binding;GO:0005737, cytoplasm;GO:0005773, vacuole;GO:0005829, cytosol;GO:0005886, plasma membrane;GO:0006749, glutathione metabolic process;GO:0006952, defense response;GO:0009407, toxin catabolic process;GO:0009506, plasmodesma;GO:0009507, chloroplast;GO:0009570, chloroplast stroma;GO:…	-	30.2577	36.2714	22.6424	4.03998	8.88646	4.62429	15.0413	12.0149	4.65777	6.84802	27.7009	8.41507	6.71927	9.04645	5.52916	9.66483	9.12699	24.7696
	T_47030_c0_g1	N	gi|1012353919|gb|KYP65107.1| putative glutathione S-transferase [Cajanus cajan] 1.1e-107	GO:0004364, glutathione transferase activity;GO:0009734, auxin-activated signaling pathway	K00799-ko00480 Glutathione metabolism;ko00980 Metabolism of xenobiotics by cytochrome P450;ko00982 Drug metabolism - cytochrome P450	0.588652	0.496515	0.075005	1.05826	0.538101	0.214027	0	0	0.146697	1.39554	0	0.442031	0.931956	2.26328	0	2.30051	0.438435	0.115833
MDHAR	T_46831_c3_g1	N	gi|571526476|ref|XP_006599107.1| PREDICTED: probable monodehydroascorbate reductase, cytoplasmic isoform 2 [Glycine max] 1.9e-244	GO:0005778, peroxisomal membrane;GO:0009941, chloroplast envelope;GO:0016021, integral component of membrane;GO:0016491, oxidoreductase activity;GO:0016656, monodehydroascorbate reductase (NADH) activity;GO:0042744, hydrogen peroxide catabolic process;GO:0050660, flavin adenine dinucleotide binding	K08232-ko00053 Ascorbate and aldarate metabolism	8.30347	7.15234	5.63618	4.39874	6.02069	6.02766	6.24511	7.13495	3.84256	5.03981	6.86955	5.10473	4.96221	8.06034	7.63135	6.25902	6.23982	5.80355
	T_35331_c0_g1	N	gi|734431927|gb|KHN46012.1| Bifunctional monodehydroascorbate reductase and carbonic anhydrase nectarin-3 [Glycine soja] 1.2e-138	GO:0004089, carbonate dehydratase activity;GO:0005783, endoplasmic reticulum;GO:0006730, one-carbon metabolic process;GO:0008270, zinc ion binding;GO:0009570, chloroplast stroma	K01674-ko00910 Nitrogen metabolism	4.35661	3.75834	3.12055	2.03686	4.17534	3.53059	2.26488	1.73359	1.39719	1.70116	2.89357	3.18661	2.79397	2.44285	4.2754	1.54855	4.05143	5.11092
	T_36716_c0_g1	N	gi|734417691|gb|KHN39017.1| Bifunctional monodehydroascorbate reductase and carbonic anhydrase nectarin-3 [Glycine soja] 5.5e-145	GO:0004089, carbonate dehydratase activity;GO:0006730, one-carbon metabolic process;GO:0008270, zinc ion binding;GO:0009570, chloroplast stroma;GO:0016021, integral component of membrane	K01674-ko00910 Nitrogen metabolism	0.201519	0.0857263	0	0.241346	0.209898	0.128704	0.864988	0.252291	0.100464	0.646817	0.527374	0.216081	0.44971	0.898424	0.259057	1.19942	1.16058	0.67177
	T_43168_c1_g1	N	gi|574584345|ref|NP_001276311.1| uncharacterized protein LOC100787700 [Glycine max] 1.9e-142	GO:0005623, cell;GO:0005737, cytoplasm;GO:0016656, monodehydroascorbate reductase (NADH) activity;GO:0045454, cell redox homeostasis;GO:0050660, flavin adenine dinucleotide binding	K08232-ko00053 Ascorbate and aldarate metabolism	260.624	215.743	197.32	286.563	273.19	220.662	321.393	324.674	284.868	281.538	304.187	155.691	237.035	255.007	269.066	350.503	277.542	275.367
	T_39168_c0_g2	N	gi|1012347454|gb|KYP58645.1| hypothetical protein KK1_014061, partial [Cajanus cajan] 2.1e-267	GO:0005524, ATP binding;GO:0005739, mitochondrion;GO:0009409, response to cold;GO:0009507, chloroplast;GO:0009570, chloroplast stroma;GO:0010319, stromule;GO:0016491, oxidoreductase activity;GO:0016656, monodehydroascorbate reductase (NADH) activity;GO:0046686, response to cadmium ion	K08232-ko00053 Ascorbate and aldarate metabolism	25.9697	37.1254	37.8464	29.1971	39.4637	43.118	52.9436	40.9684	67.9696	30.8588	33.4027	37.9572	37.5773	37.7766	36.3292	22.6074	23.3711	32.6317
