# Supplementary material for: Transcriptome sequencing and analysis reveals the molecular response to selenium stimuli in Pueraria lobata (willd.) Ohwi
Source: PeerJ. 2020 Mar 24;8:e8768. doi: 10.7717/peerj.8768 (PMC7100600; doi:10.7717/peerj.8768)
Supplement: Table S14 — D0, D1, D3, D5, D7 and D9 represent different days after sodium selenite treatment. [file peerj-08-8768-s019.xls]

## Sheet: 异黄酮及其上下游途径
Table S14. Expression profiles of 624 TFs were correlated with those of structual genes in isoflavone biosynthesis
TF Gene ID	TF Family	NR annotation	GO annotation	KEGG annotation	PAL					4CL					C4H			CHS		CHI			CHR	IFS	HID							IF7MAT			I7OMT		Number of co-expression structural genes
					TRINITY_DN43687_c4_g5	TRINITY_DN43687_c4_g4	TRINITY_DN43074_c0_g3	TRINITY_DN46588_c1_g1	TRINITY_DN43074_c0_g1	TRINITY_DN40122_c2_g1	TRINITY_DN41590_c0_g1	TRINITY_DN39758_c1_g1	TRINITY_DN41578_c2_g2	TRINITY_DN41705_c0_g5	TRINITY_DN41767_c1_g1	TRINITY_DN38198_c0_g1	TRINITY_DN29058_c0_g1	TRINITY_DN45464_c1_g2	TRINITY_DN44399_c2_g7	TRINITY_DN41656_c0_g2	TRINITY_DN39699_c4_g7	TRINITY_DN39699_c4_g1	TRINITY_DN40196_c1_g3	TRINITY_DN46470_c0_g3	TRINITY_DN39265_c2_g3	TRINITY_DN44566_c1_g3	TRINITY_DN46582_c0_g2	TRINITY_DN41375_c0_g7	TRINITY_DN41375_c0_g6	TRINITY_DN41375_c0_g5	TRINITY_DN41375_c0_g2	TRINITY_DN44764_c2_g1	TRINITY_DN40220_c2_g6	TRINITY_DN40220_c2_g3	TRINITY_DN39990_c1_g2	TRINITY_DN45943_c2_g1
T_33200_c0_g1	C2C2->C2C2-GATA	gi|571491267|ref|XP_006591861.1| PREDICTED: uncharacterized protein LOC100783345 isoform X1 [Glycine max] 2.4e-100	GO:0003677, DNA binding;GO:0003700, DNA binding transcription factor activity;GO:0005634, nucleus;GO:0006351, transcription, DNA-templated;GO:0009908, flower development;GO:0010228, vegetative to reproductive phase transition of meristem;GO:0040008, regulation of growth;GO:0048364, root development	-	-0.0788504	-0.872088	-0.913187	-0.278305	-0.0156681	-0.849565	0.208821	-0.334321	0.0365142	0.243537	-0.881705	0.2351	0.417873	-0.781423	-0.16664	-0.730969	0.396747	0.114525	-0.691926	-0.816533	-0.450259	-0.718264	0.0464341	-0.482839	-0.578911	0.455731	-0.790265	-0.370062	-0.260091	-0.156536	0.286115	-0.0766576	9
T_45976_c1_g1	Tify	gi|147765294|emb|CAN77889.1| hypothetical protein VITISV_003778 [Vitis vinifera] 5.9e-75	GO:0005634, nucleus;GO:0006355, regulation of transcription, DNA-templated;GO:0008270, zinc ion binding	-	-0.221097	-0.82	-0.870795	-0.349829	-0.0174787	-0.758001	0.0139745	-0.394149	-0.189508	0.385981	-0.870099	0.329571	0.403172	-0.756948	-0.256774	-0.615584	0.468711	0.0612198	-0.641	-0.753406	-0.490866	-0.832785	-0.103883	-0.62882	-0.740232	0.473253	-0.714168	-0.259436	-0.110438	-0.277658	0.250038	-0.0689438	9
T_33724_c0_g1	C2H2	gi|571488428|ref|XP_006590934.1| PREDICTED: protein FAR-RED IMPAIRED RESPONSE 1-like [Glycine max] 0.0e+00	GO:0003700, DNA binding transcription factor activity;GO:0005634, nucleus;GO:0006355, regulation of transcription, DNA-templated;GO:0008270, zinc ion binding;GO:0009639, response to red or far red light;GO:0010017, red or far-red light signaling pathway;GO:0010018, far-red light signaling pathway;GO:0010218, response to far red light;GO:0042753, positive regulation of circadian rhythm;GO:0045893,…	-	-0.0735405	-0.769428	-0.864996	-0.463032	-0.151701	-0.817055	0.0738304	-0.26244	-0.0500186	0.38483	-0.87256	0.351247	0.280029	-0.743636	-0.19554	-0.773083	0.424157	-0.165059	-0.697135	-0.829036	-0.423358	-0.666909	-0.0632395	-0.526226	-0.705917	0.382548	-0.767174	-0.308112	-0.0650561	-0.0492883	0.271545	-0.188157	9
T_42109_c1_g7	AP2/ERF->AP2/ERF-ERF	gi|734338398|gb|KHN08773.1| NAC domain-containing protein 74 [Glycine soja] 2.2e-305	GO:0003677, DNA binding;GO:0003700, DNA binding transcription factor activity;GO:0005634, nucleus;GO:0006351, transcription, DNA-templated;GO:0006355, regulation of transcription, DNA-templated;GO:0016021, integral component of membrane;GO:0090602, sieve element enucleation;GO:0090603, sieve element differentiation	-	-0.178776	-0.77789	-0.835599	-0.233054	-0.241452	-0.532629	0.0932864	-0.430953	-0.257997	0.493071	-0.772531	0.428427	0.189228	-0.737353	-0.316153	-0.490088	0.354588	0.0915616	-0.588749	-0.785427	-0.198367	-0.809897	-0.0681921	-0.778961	-0.718732	0.34733	-0.615301	-0.157285	0.00374131	-0.302823	0.0497929	-0.148436	8
T_39556_c3_g4	MYB->MYB-related	gi|356546348|ref|XP_003541588.1| PREDICTED: trihelix transcription factor ASIL1-like [Glycine max] 7.3e-118	GO:0003677, DNA binding;GO:0003700, DNA binding transcription factor activity;GO:0005634, nucleus;GO:0006351, transcription, DNA-templated;GO:0006355, regulation of transcription, DNA-templated;GO:0009793, embryo development ending in seed dormancy;GO:0010431, seed maturation	-	-0.372674	-0.854769	-0.91526	-0.461246	-0.119917	-0.753287	0.039151	-0.368845	-0.106679	0.349342	-0.877905	0.397546	0.270058	-0.746804	-0.145984	-0.658493	0.34357	-0.0502748	-0.647242	-0.814819	-0.370873	-0.788764	0.0496634	-0.515749	-0.643247	0.517603	-0.812104	-0.423977	-0.0854491	-0.321964	0.18262	-0.230197	8
T_39933_c3_g1	MYB->MYB-related	gi|571439073|ref|XP_006574748.1| PREDICTED: uncharacterized protein LOC100786282 isoform X2 [Glycine max] 7.0e-209	GO:0003677, DNA binding;GO:0003700, DNA binding transcription factor activity;GO:0005634, nucleus;GO:0006351, transcription, DNA-templated;GO:0006355, regulation of transcription, DNA-templated	-	-0.197581	-0.916415	-0.942229	-0.481955	-0.0793602	-0.737688	-0.00903106	-0.418884	-0.113234	0.361004	-0.888489	0.383017	0.243204	-0.751845	-0.239043	-0.676141	0.405663	0.00416155	-0.545639	-0.828543	-0.387227	-0.745569	0.0947738	-0.551898	-0.619352	0.426034	-0.793091	-0.391754	-0.0476221	-0.342587	0.257062	-0.198872	8
T_46021_c2_g1	Tify	gi|734338791|gb|KHN08852.1| Putative WRKY transcription factor 72 [Glycine soja] 2.3e-119	GO:0003700, DNA binding transcription factor activity;GO:0005634, nucleus;GO:0006351, transcription, DNA-templated;GO:0043565, sequence-specific DNA binding;GO:0044212, transcription regulatory region DNA binding;GO:0045892, negative regulation of transcription, DNA-templated	-	-0.00532585	0.780858	0.842084	0.256645	0.237719	0.673225	-0.185566	0.369403	0.197541	-0.418258	0.808351	-0.377101	-0.248451	0.730714	0.25904	0.616887	-0.341166	-0.0964279	0.707787	0.781985	0.265043	0.704622	0.101723	0.642262	0.716	-0.37081	0.628152	0.212639	0.107073	0.0937565	-0.164109	0.101662	8
T_40475_c2_g2	bZIP	gi|947067490|gb|KRH16633.1| hypothetical protein GLYMA_14G167000 [Glycine max] 2.8e-157	GO:0003700, DNA binding transcription factor activity;GO:0005634, nucleus;GO:0006351, transcription, DNA-templated;GO:0042742, defense response to bacterium;GO:0043565, sequence-specific DNA binding	K14431-ko04075 Plant hormone signal transduction	-0.250746	-0.924938	-0.950669	-0.490769	-0.175045	-0.726089	0.120273	-0.360231	-0.0842522	0.288077	-0.860048	0.415795	0.212027	-0.724645	-0.141206	-0.650413	0.298642	-0.015919	-0.601012	-0.83056	-0.207724	-0.759082	0.0952083	-0.494138	-0.601365	0.411888	-0.855135	-0.448759	-0.0353608	-0.351123	0.265417	-0.280196	8
T_46868_c1_g5	DDT	gi|950935782|ref|XP_014517385.1| PREDICTED: protein SHOOT GRAVITROPISM 5-like [Vigna radiata var. radiata] 4.2e-202	GO:0003676, nucleic acid binding;GO:0003700, DNA binding transcription factor activity;GO:0005634, nucleus;GO:0006351, transcription, DNA-templated;GO:0006355, regulation of transcription, DNA-templated;GO:0009630, gravitropism;GO:0009965, leaf morphogenesis;GO:0010601, positive regulation of auxin biosynthetic process;GO:0043621, protein self-association;GO:0044212, transcription regulatory regi…	-	-0.310505	-0.790828	-0.828229	-0.337792	-0.329366	-0.521751	0.129907	-0.358127	-0.210788	0.542387	-0.744867	0.315629	0.175354	-0.771869	-0.227691	-0.499516	0.270564	0.00741462	-0.562726	-0.798281	-0.144598	-0.740812	0.109373	-0.716494	-0.610186	0.444123	-0.606413	-0.26489	-0.0415981	-0.422459	-0.0638709	-0.237487	7
T_44649_c1_g3	C2H2	gi|356574629|ref|XP_003555448.1| PREDICTED: protein indeterminate-domain 5, chloroplastic-like [Glycine max] 2.6e-209	GO:0003676, nucleic acid binding;GO:0003677, DNA binding;GO:0003700, DNA binding transcription factor activity;GO:0006351, transcription, DNA-templated;GO:0009507, chloroplast;GO:0046872, metal ion binding	-	-0.399826	-0.728942	-0.73888	-0.221013	-0.0681239	-0.527167	0.0516607	-0.297785	-0.135011	0.351011	-0.701427	0.136771	0.444843	-0.794105	-0.312011	-0.458839	0.351394	0.0725946	-0.467397	-0.705161	-0.364438	-0.758357	0.102906	-0.7229	-0.559346	0.339249	-0.518633	-0.188762	-0.191274	-0.545417	0.0151825	-0.0393168	7
T_39556_c3_g1	MYB->MYB-related	gi|356510463|ref|XP_003523957.1| PREDICTED: trihelix transcription factor ASIL2-like [Glycine max] 2.0e-114	GO:0003677, DNA binding;GO:0003700, DNA binding transcription factor activity;GO:0005634, nucleus;GO:0006351, transcription, DNA-templated;GO:0006355, regulation of transcription, DNA-templated;GO:0009793, embryo development ending in seed dormancy;GO:0010431, seed maturation	-	-0.0320612	-0.764052	-0.875757	-0.19928	-0.0141985	-0.796527	0.256164	-0.211588	0.0982726	0.235913	-0.81457	0.291855	0.384125	-0.667688	-0.0889318	-0.735594	0.27851	0.0145156	-0.665751	-0.776368	-0.370996	-0.645182	0.0319208	-0.352903	-0.565201	0.339056	-0.783114	-0.336675	-0.138664	-0.0344704	0.25029	-0.0755283	7
T_43398_c4_g3	C2H2	gi|734403780|gb|KHN32602.1| hypothetical protein glysoja_022284 [Glycine soja] 5.5e-134	GO:0003677, DNA binding;GO:0003700, DNA binding transcription factor activity;GO:0005634, nucleus;GO:0005730, nucleolus;GO:0006351, transcription, DNA-templated;GO:0006355, regulation of transcription, DNA-templated;GO:0009733, response to auxin;GO:0009793, embryo development ending in seed dormancy;GO:0010029, regulation of seed germination;GO:0010431, seed maturation;GO:0044212, transcription r…	-	-0.1959	-0.75617	-0.792545	-0.253893	0.193305	-0.712286	0.0773988	-0.33964	-0.0157698	0.331275	-0.89458	0.331311	0.415616	-0.715816	-0.111033	-0.621019	0.424718	0.000815961	-0.526821	-0.768506	-0.48585	-0.595595	0.087084	-0.464838	-0.503444	0.416108	-0.714334	-0.239511	0.087962	-0.307602	0.497302	-0.0426265	7
T_42613_c1_g1	HB->HB-WOX	gi|571497861|ref|XP_006594044.1| PREDICTED: protein PHR1-LIKE 1-like isoform X1 [Glycine max] 4.2e-210	GO:0003677, DNA binding;GO:0003700, DNA binding transcription factor activity;GO:0005634, nucleus;GO:0006351, transcription, DNA-templated;GO:0006355, regulation of transcription, DNA-templated;GO:0007623, circadian rhythm;GO:0016036, cellular response to phosphate starvation;GO:0055063, sulfate ion homeostasis;GO:0071486, cellular response to high light intensity	-	-0.194018	-0.841424	-0.826245	-0.51372	-0.147822	-0.742321	0.139769	-0.329616	0.00588604	0.221742	-0.756134	0.163966	0.274109	-0.746746	-0.0672636	-0.640709	0.339995	-0.0678951	-0.573289	-0.774536	-0.393421	-0.641403	0.0111999	-0.54307	-0.576969	0.337979	-0.718332	-0.350928	-0.26788	-0.331371	0.231349	-0.312944	7
T_43810_c0_g3	B3->B3-ARF	gi|947046990|gb|KRG96619.1| hypothetical protein GLYMA_19G222200 [Glycine max] 1.6e-191	GO:0003677, DNA binding;GO:0005634, nucleus;GO:0006351, transcription, DNA-templated;GO:0006355, regulation of transcription, DNA-templated;GO:0016021, integral component of membrane	-	-0.113516	-0.762265	-0.814669	-0.238097	-0.369585	-0.552397	0.241058	-0.345764	-0.237952	0.567782	-0.745647	0.330413	0.201732	-0.752104	-0.2139	-0.54423	0.294829	0.10432	-0.634881	-0.784955	-0.206628	-0.663463	-0.0658584	-0.703012	-0.72303	0.400178	-0.566406	-0.208444	-0.144717	-0.253923	0.0143086	-0.144343	7
T_44409_c2_g3	bHLH	gi|1012365045|gb|KYP76227.1| Nuclear transcription factor Y subunit A-1 [Cajanus cajan] 1.8e-59	GO:0003677, DNA binding;GO:0003700, DNA binding transcription factor activity;GO:0006351, transcription, DNA-templated;GO:0009555, pollen development;GO:0009793, embryo development ending in seed dormancy;GO:0010262, somatic embryogenesis;GO:0016602, CCAAT-binding factor complex;GO:0045892, negative regulation of transcription, DNA-templated;GO:0048316, seed development;GO:0055046, microgametogen…	-	-0.242188	-0.835099	-0.822981	-0.482265	-0.0830369	-0.839453	0.269062	-0.140991	0.274529	-0.0859621	-0.74001	0.280042	0.232504	-0.696211	0.0491621	-0.703109	0.13672	-0.170501	-0.646944	-0.754695	-0.234206	-0.598636	0.272437	-0.200819	-0.283623	0.450862	-0.868864	-0.596204	-0.186092	-0.228974	0.377142	-0.368362	7
T_44951_c0_g3	NF-Y->NF-YA	gi|1012340510|gb|KYP51725.1| Protein FAR1-RELATED SEQUENCE 5 [Cajanus cajan] 5.2e-273	GO:0003700, DNA binding transcription factor activity;GO:0005634, nucleus;GO:0006355, regulation of transcription, DNA-templated;GO:0008270, zinc ion binding;GO:0043565, sequence-specific DNA binding	-	-0.354113	-0.809825	-0.818053	-0.350272	-0.166359	-0.693256	0.210212	-0.338328	-0.124157	0.236818	-0.772504	0.306849	0.344338	-0.704522	-0.0654555	-0.516812	0.292235	0.100186	-0.658155	-0.725131	-0.241092	-0.770641	-0.0888729	-0.540827	-0.643627	0.502094	-0.751894	-0.339479	-0.19715	-0.354189	0.219293	-0.193935	7
T_38738_c0_g1	WRKY	gi|1012323106|gb|KYP35295.1| Myb family transcription factor APL [Cajanus cajan] 4.9e-68	GO:0003677, DNA binding;GO:0005634, nucleus;GO:0006351, transcription, DNA-templated;GO:0006355, regulation of transcription, DNA-templated	-	-0.171223	-0.769659	-0.871272	-0.0943888	-0.237603	-0.583243	0.243605	-0.309074	-0.089834	0.42258	-0.809525	0.456142	0.212542	-0.73404	-0.29451	-0.605416	0.356875	0.151918	-0.654672	-0.805901	-0.187218	-0.746438	0.0390912	-0.564924	-0.625326	0.360144	-0.72551	-0.344989	-0.130546	-0.1815	0.121862	-0.0498424	7
T_39846_c2_g2	MYB->MYB	gi|1012363476|gb|KYP74659.1| Myb-related protein Myb4 [Cajanus cajan] 1.8e-129	GO:0003677, DNA binding;GO:0005634, nucleus;GO:0006351, transcription, DNA-templated;GO:0006355, regulation of transcription, DNA-templated	-	-0.0449001	-0.768512	-0.83563	-0.223184	0.152922	-0.761594	0.0756859	-0.237842	0.109236	0.256907	-0.848278	0.387233	0.316967	-0.706671	-0.203121	-0.723507	0.423868	-0.03657	-0.584034	-0.72801	-0.505825	-0.584683	0.285161	-0.333012	-0.363433	0.444298	-0.69717	-0.382017	-0.0653424	-0.161491	0.409922	-0.0504925	7
T_46860_c2_g2	DDT	gi|571462504|ref|XP_006582302.1| PREDICTED: uncharacterized protein LOC100797480 isoform X3 [Glycine max] 0.0e+00	GO:0003677, DNA binding;GO:0003700, DNA binding transcription factor activity;GO:0005634, nucleus;GO:0006351, transcription, DNA-templated;GO:0006355, regulation of transcription, DNA-templated;GO:0009908, flower development;GO:0010228, vegetative to reproductive phase transition of meristem	-	-0.317467	-0.746422	-0.789309	-0.290696	0.0895061	-0.693114	0.036636	-0.351932	-0.0930852	0.334959	-0.849296	0.344907	0.441331	-0.741972	-0.145419	-0.550302	0.445601	-0.0176878	-0.562681	-0.766664	-0.452011	-0.730546	-0.0529346	-0.649546	-0.635328	0.447376	-0.700097	-0.14031	0.0184079	-0.375156	0.337272	-0.101026	7
T_42901_c0_g1	SAP	gi|593693490|ref|XP_007147266.1| hypothetical protein PHAVU_006G1097000g, partial [Phaseolus vulgaris] 2.5e-103	GO:0003700, DNA binding transcription factor activity;GO:0005634, nucleus;GO:0006351, transcription, DNA-templated;GO:0043565, sequence-specific DNA binding	-	-0.228888	-0.748271	-0.832502	-0.335616	-0.142633	-0.723163	0.366637	-0.153275	0.192643	0.233259	-0.814921	0.443356	0.194361	-0.687137	0.149137	-0.703816	0.143592	-0.236097	-0.652535	-0.878565	-0.167585	-0.50669	0.122105	-0.336719	-0.466803	0.354808	-0.868655	-0.377877	0.0834947	-0.185602	0.386732	-0.360867	7
T_42407_c1_g1	WRKY	gi|1012320034|gb|KYP32890.1| NAC domain-containing protein 7 [Cajanus cajan] 6.9e-110	GO:0003677, DNA binding;GO:0003700, DNA binding transcription factor activity;GO:0005634, nucleus;GO:0006351, transcription, DNA-templated;GO:0006355, regulation of transcription, DNA-templated;GO:0007275, multicellular organism development;GO:0010200, response to chitin;GO:0043565, sequence-specific DNA binding;GO:0044212, transcription regulatory region DNA binding;GO:0048759, xylem vessel memb…	-	-0.152621	-0.668055	-0.710009	-0.33553	-0.0779394	-0.746921	0.13904	-0.305267	-0.0583942	0.327434	-0.772921	-0.0413602	0.439687	-0.789078	-0.202829	-0.617786	0.397668	-0.0646465	-0.711937	-0.73879	-0.419153	-0.714884	-0.0548325	-0.626343	-0.596518	0.318162	-0.580019	-0.19846	-0.205008	-0.0987833	0.113201	-0.110697	7
T_44409_c2_g2	bHLH	gi|571442433|ref|XP_006575727.1| PREDICTED: uncharacterized protein LOC102664020 isoform X2 [Glycine max] 4.5e-63	GO:0003677, DNA binding;GO:0003700, DNA binding transcription factor activity;GO:0006351, transcription, DNA-templated;GO:0009555, pollen development;GO:0009793, embryo development ending in seed dormancy;GO:0010262, somatic embryogenesis;GO:0016602, CCAAT-binding factor complex;GO:0045892, negative regulation of transcription, DNA-templated;GO:0048316, seed development;GO:0055046, microgametogen…	-	-0.149781	-0.757601	-0.812826	-0.444475	-0.270646	-0.715753	0.352117	-0.160476	0.244683	0.197374	-0.735165	0.414168	0.0232429	-0.675415	0.154701	-0.708413	0.0604966	-0.311598	-0.617448	-0.881956	-0.116257	-0.466497	0.163856	-0.322129	-0.403688	0.352352	-0.851311	-0.430282	0.0626912	-0.12874	0.277026	-0.504366	7
T_42736_c1_g8	C3H	gi|947046843|gb|KRG96472.1| hypothetical protein GLYMA_19G213100 [Glycine max] 2.0e-74	GO:0003677, DNA binding;GO:0003700, DNA binding transcription factor activity;GO:0005634, nucleus;GO:0006351, transcription, DNA-templated;GO:0009873, ethylene-activated signaling pathway;GO:0034059, response to anoxia	-	0.12219	0.612508	0.736379	0.0428831	0.169	0.721253	-0.484327	-0.0138803	-0.228835	-0.262427	0.755951	-0.230541	-0.486642	0.896647	0.0658211	0.751179	-0.149244	0.250309	0.779888	0.919405	0.361696	0.523526	-0.038562	0.632008	0.583278	-0.192995	0.59319	0.0981299	0.145401	0.109081	-0.189408	0.122669	7
T_36389_c0_g2	WRKY	gi|734420997|gb|KHN41175.1| Myb-related protein Myb4 [Glycine soja] 1.7e-55	GO:0003677, DNA binding;GO:0003700, DNA binding transcription factor activity;GO:0005634, nucleus;GO:0006351, transcription, DNA-templated;GO:0006355, regulation of transcription, DNA-templated;GO:0009506, plasmodesma;GO:0009625, response to insect	-	-0.0464253	-0.753479	-0.786198	-0.431233	0.0250961	-0.849056	0.205803	-0.108647	0.376352	0.0752666	-0.737432	0.24261	0.171977	-0.64909	0.10887	-0.822212	0.130044	-0.244581	-0.554195	-0.749154	-0.46729	-0.329651	0.422865	-0.0448142	-0.162117	0.495264	-0.753568	-0.579737	-0.163466	-0.0698674	0.333251	-0.309888	7
T_39785_c0_g1	HB->HB-HD-ZIP	gi|593266232|ref|XP_007135294.1| hypothetical protein PHAVU_010G117200g [Phaseolus vulgaris] 2.4e-116	GO:0003700, DNA binding transcription factor activity;GO:0005634, nucleus;GO:0006351, transcription, DNA-templated;GO:0009414, response to water deprivation;GO:0009737, response to abscisic acid;GO:0043565, sequence-specific DNA binding;GO:0045893, positive regulation of transcription, DNA-templated	-	-0.225945	-0.822589	-0.850209	-0.492967	-0.173789	-0.802888	0.324245	-0.23007	0.26987	0.106303	-0.7755	0.39123	0.0594199	-0.67018	0.229588	-0.726407	0.0291569	-0.248896	-0.635947	-0.870013	-0.20982	-0.488633	0.209019	-0.219996	-0.349262	0.482575	-0.906421	-0.538455	-0.00874462	-0.162877	0.312027	-0.512003	7
T_43074_c0_g4	GARP->GARP-ARR-B	gi|571454077|ref|XP_006579672.1| PREDICTED: two-component response regulator-like APRR2 isoform X1 [Glycine max] 1.1e-279	GO:0000160, phosphorelay signal transduction system;GO:0003677, DNA binding;GO:0003700, DNA binding transcription factor activity;GO:0005634, nucleus;GO:0006351, transcription, DNA-templated;GO:0006355, regulation of transcription, DNA-templated	-	-0.251678	-0.586894	-0.742221	-0.233343	-0.140551	-0.813088	0.42437	0.189939	0.37044	0.0493868	-0.680769	0.0789807	0.487745	-0.763582	-0.00847205	-0.795997	0.0570746	-0.41004	-0.791555	-0.785343	-0.232899	-0.609546	0.231686	-0.275183	-0.393055	0.201924	-0.731851	-0.396537	-0.18153	-0.0205942	0.0999273	-0.206437	7
T_39824_c2_g3	HB->HB-other	gi|571467246|ref|XP_006583882.1| PREDICTED: bZIP transcription factor TRAB1-like [Glycine max] 2.2e-129	GO:0003700, DNA binding transcription factor activity;GO:0004553, hydrolase activity, hydrolyzing O-glycosyl compounds;GO:0005576, extracellular region;GO:0005618, cell wall;GO:0005886, plasma membrane;GO:0005975, carbohydrate metabolic process;GO:0006952, defense response;GO:0009506, plasmodesma;GO:0030247, polysaccharide binding;GO:0031225, anchored component of membrane;GO:0042973, glucan endo…	K14432-ko04075 Plant hormone signal transduction	-0.0975751	-0.848848	-0.885811	-0.43096	0.0785665	-0.761406	0.0720042	-0.355078	0.048949	0.288299	-0.893929	0.459088	0.177445	-0.615732	-0.0150299	-0.696857	0.336559	-0.0481309	-0.521767	-0.78032	-0.334158	-0.527439	0.234575	-0.257943	-0.387917	0.503339	-0.846163	-0.445201	0.120957	-0.204005	0.477573	-0.225755	6
T_41844_c1_g1	bHLH	gi|734364110|gb|KHN17093.1| Protein SENSITIVE TO PROTON RHIZOTOXICITY 1 [Glycine soja] 4.7e-278	GO:0003676, nucleic acid binding;GO:0003700, DNA binding transcription factor activity;GO:0005634, nucleus;GO:0006351, transcription, DNA-templated;GO:0006355, regulation of transcription, DNA-templated;GO:0010044, response to aluminum ion;GO:0010447, response to acidic pH;GO:0046872, metal ion binding	-	-0.101109	-0.742556	-0.790161	-0.294253	0.132642	-0.730332	0.2399	-0.255407	0.235755	0.254846	-0.817054	0.287508	0.206912	-0.581189	0.16698	-0.681287	0.176538	-0.088226	-0.477806	-0.771261	-0.310769	-0.379142	0.320002	-0.111665	-0.227169	0.471863	-0.816032	-0.440984	0.144201	-0.144293	0.431568	-0.227063	6
T_42498_c1_g1	GARP->GARP-G2-like	gi|920699292|gb|KOM42517.1| hypothetical protein LR48_Vigan05g012100 [Vigna angularis] 2.2e-94	GO:0003700, DNA binding transcription factor activity;GO:0005634, nucleus;GO:0005737, cytoplasm;GO:0006351, transcription, DNA-templated;GO:0043565, sequence-specific DNA binding	-	-0.142439	-0.866701	-0.812772	-0.625647	-0.111852	-0.852191	0.153583	-0.401086	0.10318	0.0847132	-0.76188	0.194792	0.126782	-0.641572	0.126954	-0.667863	0.218945	-0.0514464	-0.597213	-0.744372	-0.375783	-0.531374	0.0651315	-0.274175	-0.411882	0.551857	-0.820599	-0.526063	-0.236277	-0.165863	0.319162	-0.426335	6
T_41380_c0_g1	LOB	gi|955324931|ref|XP_014632033.1| PREDICTED: E2F transcription factor-like E2FE isoform X5 [Glycine max] 8.1e-94	GO:0003677, DNA binding;GO:0003700, DNA binding transcription factor activity;GO:0005634, nucleus;GO:0005667, transcription factor complex;GO:0006351, transcription, DNA-templated;GO:0032876, negative regulation of DNA endoreduplication;GO:0042023, DNA endoreduplication	-	-0.126659	-0.741593	-0.842122	-0.209985	-0.00348835	-0.566833	-0.067535	-0.455797	-0.391323	0.720424	-0.902685	0.386869	0.385626	-0.6393	-0.326627	-0.560668	0.540416	0.24155	-0.484064	-0.711665	-0.423408	-0.64021	-0.0559734	-0.602043	-0.75399	0.483037	-0.585921	-0.147659	0.0512455	-0.261543	0.181122	0.156078	6
T_42845_c1_g7	LOB	gi|308191649|dbj|BAJ22387.1| suppressor of overexpression of constans 1 [Vigna unguiculata] 1.2e-50	GO:0000060, protein import into nucleus, translocation;GO:0003677, DNA binding;GO:0003700, DNA binding transcription factor activity;GO:0005634, nucleus;GO:0005737, cytoplasm;GO:0006351, transcription, DNA-templated;GO:0008134, transcription factor binding;GO:0009409, response to cold;GO:0009739, response to gibberellin;GO:0009908, flower development;GO:0009911, positive regulation of flower deve…	-	-0.284517	-0.839629	-0.820839	-0.374055	-0.0170413	-0.725547	0.107246	-0.329918	-0.11331	0.289086	-0.796343	0.182696	0.428697	-0.74142	-0.154727	-0.563177	0.370659	0.113454	-0.559428	-0.690526	-0.42772	-0.731579	0.0496145	-0.49025	-0.567484	0.51531	-0.689133	-0.377566	-0.209657	-0.422809	0.273733	-0.0865208	6
T_43944_c0_g2	AP2/ERF->AP2/ERF-ERF	gi|356501908|ref|XP_003519765.1| PREDICTED: pre-mRNA-splicing factor CEF1-like [Glycine max] 4.1e-226	GO:0003677, DNA binding;GO:0003700, DNA binding transcription factor activity;GO:0005634, nucleus;GO:0006351, transcription, DNA-templated;GO:0007049, cell cycle	-	-0.372993	-0.849686	-0.836501	-0.421193	-0.386644	-0.547525	0.217223	-0.316361	-0.0865197	0.229418	-0.640604	0.289951	0.071378	-0.717013	-0.163504	-0.454359	0.155896	-0.00396623	-0.591657	-0.72203	0.00936116	-0.853976	0.150863	-0.560145	-0.4916	0.369318	-0.717778	-0.481113	-0.173102	-0.449345	-0.0275405	-0.40045	6
T_40707_c0_g2	MYB->MYB	gi|356571172|ref|XP_003553753.1| PREDICTED: mediator-associated protein 1 [Glycine max] 4.7e-133	GO:0005730, nucleolus;GO:0005829, cytosol;GO:0006355, regulation of transcription, DNA-templated;GO:0009507, chloroplast;GO:0016592, mediator complex	-	0.298563	0.802442	0.866268	0.285725	0.316571	0.462097	-0.144674	0.365994	0.270975	-0.538466	0.794896	-0.379477	-0.168562	0.70482	0.2957	0.515351	-0.331732	-0.113737	0.549261	0.77534	0.0443292	0.740128	-0.104378	0.608988	0.636147	-0.287139	0.669266	0.360683	0.0237131	0.398337	-0.0598685	0.127565	6
T_41845_c0_g4	bHLH	gi|356513447|ref|XP_003525425.1| PREDICTED: NAC domain-containing protein 83-like [Glycine max] 1.4e-116	GO:0003677, DNA binding;GO:0003700, DNA binding transcription factor activity;GO:0005634, nucleus;GO:0006351, transcription, DNA-templated;GO:0006355, regulation of transcription, DNA-templated;GO:0009651, response to salt stress;GO:0009737, response to abscisic acid;GO:0010089, xylem development;GO:0010150, leaf senescence;GO:0016032, viral process;GO:0045892, negative regulation of transcriptio…	-	-0.0409911	-0.747023	-0.836277	-0.156497	-0.0364059	-0.511435	-0.0644367	-0.386712	-0.365375	0.62145	-0.785753	0.30645	0.368425	-0.691649	-0.51507	-0.518804	0.566676	0.195028	-0.488702	-0.643011	-0.411324	-0.813471	-0.0186218	-0.712956	-0.743044	0.246298	-0.490188	-0.136852	-0.0638805	-0.31246	0.099038	0.133242	6
T_40000_c2_g1	AP2/ERF->AP2/ERF-ERF	gi|356542453|ref|XP_003539681.1| PREDICTED: dof zinc finger protein DOF3.6 [Glycine max] 3.7e-101	GO:0003677, DNA binding;GO:0005634, nucleus;GO:0006351, transcription, DNA-templated;GO:0006355, regulation of transcription, DNA-templated;GO:0046872, metal ion binding	-	-0.2783	-0.750121	-0.801482	-0.371448	0.1631	-0.7201	-0.0416141	-0.309353	-0.0410393	0.282613	-0.847391	0.385899	0.405944	-0.666873	-0.129269	-0.582441	0.43955	-0.0895436	-0.497216	-0.731708	-0.437539	-0.693211	0.0326945	-0.512292	-0.554816	0.446586	-0.754995	-0.202381	0.119149	-0.343143	0.404128	-0.124385	6
T_44331_c1_g1	C2H2	gi|734419355|gb|KHN40076.1| Zinc finger CCCH domain-containing protein 66 [Glycine soja] 0.0e+00	GO:0003677, DNA binding;GO:0003700, DNA binding transcription factor activity;GO:0006355, regulation of transcription, DNA-templated;GO:0046872, metal ion binding	-	0.0994159	0.688163	0.798145	0.150008	0.477529	0.512086	-0.266954	0.229991	0.0523129	-0.471742	0.690133	-0.226567	-0.101114	0.853101	0.420962	0.647814	-0.225536	0.0721345	0.713038	0.854036	0.136299	0.722715	-0.15321	0.715878	0.58176	-0.136132	0.518064	0.308862	0.223828	0.0967111	0.214886	0.173936	6
T_43635_c1_g2	MADS->MADS-M-type	gi|1012349994|gb|KYP61184.1| MADS-box protein JOINTLESS [Cajanus cajan] 3.8e-38	GO:0003677, DNA binding;GO:0003700, DNA binding transcription factor activity;GO:0005634, nucleus;GO:0006351, transcription, DNA-templated;GO:0007275, multicellular organism development	-	0.0747111	-0.765589	-0.826419	-0.294853	0.125086	-0.847505	0.133639	-0.137645	0.0924074	0.291671	-0.834103	0.156953	0.526735	-0.692769	-0.179698	-0.777748	0.516329	0.0186662	-0.55801	-0.694788	-0.566662	-0.528208	0.107464	-0.328232	-0.507433	0.404304	-0.711471	-0.32153	-0.222068	-0.113043	0.434365	0.0562929	6
T_43096_c3_g1	GARP->GARP-ARR-B	gi|947101593|gb|KRH50085.1| hypothetical protein GLYMA_07G199000 [Glycine max] 4.9e-12	GO:0003677, DNA binding;GO:0003700, DNA binding transcription factor activity;GO:0005634, nucleus;GO:0006351, transcription, DNA-templated;GO:0006355, regulation of transcription, DNA-templated;GO:0009908, flower development;GO:0046872, metal ion binding	-	-0.2411	-0.669757	-0.822911	-0.196236	-0.36328	-0.635472	0.422959	0.13524	0.145571	0.217854	-0.678775	0.211995	0.3745	-0.717461	-0.180081	-0.757598	0.129936	-0.145187	-0.709973	-0.750293	-0.0749544	-0.591508	0.243779	-0.27921	-0.49719	0.144327	-0.703686	-0.523129	-0.328382	-0.144884	0.0236454	-0.0841593	6
T_38822_c0_g1	B3->B3	gi|356495976|ref|XP_003516846.1| PREDICTED: probable transcription factor GLK2 [Glycine max] 3.3e-113	GO:0003677, DNA binding;GO:0003700, DNA binding transcription factor activity;GO:0005634, nucleus;GO:0006351, transcription, DNA-templated;GO:0006355, regulation of transcription, DNA-templated;GO:0009266, response to temperature stimulus;GO:0009740, gibberellic acid mediated signaling pathway;GO:0010452, histone H3-K36 methylation;GO:0048579, negative regulation of long-day photoperiodism, flowe…	-	-0.15534	-0.649028	-0.741634	-0.136871	-0.00277417	-0.72015	0.349574	-0.0119351	0.233915	0.206218	-0.783766	0.171665	0.392402	-0.764594	-0.113941	-0.747463	0.183462	-0.169858	-0.68424	-0.766138	-0.308242	-0.514701	0.353907	-0.230131	-0.292521	0.283759	-0.669516	-0.459709	-0.06627	-0.102606	0.324277	-0.0487226	6
T_45049_c1_g2	bHLH	gi|955393196|ref|XP_014628278.1| PREDICTED: protein ALWAYS EARLY 2-like isoform X3 [Glycine max] 0.0e+00	GO:0003677, DNA binding;GO:0005634, nucleus;GO:0006351, transcription, DNA-templated;GO:0007049, cell cycle;GO:0017053, transcriptional repressor complex	-	-0.112983	-0.910193	-0.883804	-0.38764	-0.00451222	-0.594416	-0.0478335	-0.534476	-0.105159	0.26025	-0.782567	0.504374	-0.00293573	-0.599116	-0.213555	-0.543712	0.29335	0.15023	-0.393477	-0.700092	-0.324554	-0.658989	0.220341	-0.362409	-0.404168	0.426632	-0.726282	-0.494417	0.0201991	-0.35569	0.305735	-0.221042	5
T_42109_c1_g2	AP2/ERF->AP2/ERF-ERF	gi|356551985|ref|XP_003544352.1| PREDICTED: NAC domain-containing protein 86-like [Glycine max] 5.7e-306	GO:0003677, DNA binding;GO:0003700, DNA binding transcription factor activity;GO:0005634, nucleus;GO:0006351, transcription, DNA-templated;GO:0006355, regulation of transcription, DNA-templated;GO:0016021, integral component of membrane;GO:0090602, sieve element enucleation;GO:0090603, sieve element differentiation	-	-0.0237067	-0.726798	-0.787877	-0.151845	-0.0139937	-0.565263	0.0515246	-0.419941	-0.373899	0.539574	-0.803316	0.281642	0.43792	-0.61603	-0.337672	-0.471176	0.474628	0.293383	-0.510568	-0.640794	-0.31842	-0.744231	-0.206345	-0.632899	-0.784001	0.330596	-0.571386	-0.08765	0.0254279	-0.220856	0.234808	0.15495	5
T_43289_c0_g2	GRAS	gi|593787296|ref|XP_007156687.1| hypothetical protein PHAVU_002G0088000g, partial [Phaseolus vulgaris] 2.5e-114	GO:0003677, DNA binding;GO:0003700, DNA binding transcription factor activity;GO:0005634, nucleus;GO:0006351, transcription, DNA-templated;GO:0007275, multicellular organism development;GO:0009751, response to salicylic acid	-	-0.118946	-0.760621	-0.723708	-0.551438	0.29432	-0.826566	-0.0969104	-0.385315	-0.00524834	0.0722827	-0.77608	0.258293	0.373937	-0.464172	0.106401	-0.573052	0.384645	0.0318	-0.41408	-0.553748	-0.557781	-0.45139	0.00164983	-0.180071	-0.401866	0.59887	-0.733283	-0.318585	-0.05062	-0.22395	0.554058	-0.155034	5
T_40527_c0_g1	B3->B3-ARF	gi|571475536|ref|XP_006586676.1| PREDICTED: uncharacterized protein LOC100784511 isoform X4 [Glycine max] 5.7e-82	GO:0003677, DNA binding;GO:0003700, DNA binding transcription factor activity;GO:0005634, nucleus;GO:0006351, transcription, DNA-templated;GO:0006355, regulation of transcription, DNA-templated	-	-0.177459	-0.836316	-0.752937	-0.412919	0.213235	-0.728203	0.015239	-0.458954	0.0958962	-0.098256	-0.718129	0.20961	0.286209	-0.52467	0.00656453	-0.51794	0.323524	0.203699	-0.368858	-0.60143	-0.433455	-0.541371	0.0887244	-0.234205	-0.308514	0.434248	-0.768965	-0.429404	-0.232051	-0.328632	0.457104	-0.171829	5
T_45007_c0_g1	C2H2	gi|1012333293|gb|KYP44692.1| Protein FAR1-RELATED SEQUENCE 5, partial [Cajanus cajan] 4.2e-138	GO:0005634, nucleus;GO:0006355, regulation of transcription, DNA-templated;GO:0008270, zinc ion binding	-	-0.180084	-0.762773	-0.797123	-0.330404	-0.0586517	-0.642244	0.0369204	-0.319343	-0.188753	0.450654	-0.768717	0.295645	0.304381	-0.738221	-0.27023	-0.52164	0.443666	-0.0268099	-0.595697	-0.673716	-0.366202	-0.811511	0.0473172	-0.631201	-0.600043	0.442618	-0.59958	-0.239895	-0.0200647	-0.339859	0.206284	-0.138028	5
T_34794_c0_g1	zn-clus	gi|593793478|ref|XP_007159778.1| hypothetical protein PHAVU_002G266400g [Phaseolus vulgaris] 8.3e-112	GO:0001046, core promoter sequence-specific DNA binding;GO:0003700, DNA binding transcription factor activity;GO:0005634, nucleus;GO:0006351, transcription, DNA-templated;GO:0043565, sequence-specific DNA binding;GO:0044212, transcription regulatory region DNA binding;GO:0045893, positive regulation of transcription, DNA-templated;GO:1901141, regulation of lignin biosynthetic process;GO:1904369, …	-	0.0252395	-0.783219	-0.755776	-0.397614	0.234639	-0.790662	0.076673	-0.331294	0.0544718	0.165797	-0.810812	0.331639	0.311493	-0.51634	0.0928173	-0.635852	0.291836	0.0752803	-0.422005	-0.635196	-0.489674	-0.348084	0.122176	-0.120854	-0.343096	0.569373	-0.730179	-0.369751	0.0408383	-0.175926	0.621315	-0.0939027	5
T_42613_c1_g5	HB->HB-WOX	gi|571440680|ref|XP_006575231.1| PREDICTED: uncharacterized protein LOC100780919 isoform X1 [Glycine max] 3.7e-204	GO:0003677, DNA binding;GO:0003700, DNA binding transcription factor activity;GO:0005634, nucleus;GO:0006351, transcription, DNA-templated;GO:0006355, regulation of transcription, DNA-templated	-	-0.115732	-0.736357	-0.824146	-0.1989	0.0665144	-0.651774	-0.00447444	-0.414428	-0.336294	0.533045	-0.884504	0.377638	0.499052	-0.668831	-0.28486	-0.547335	0.561922	0.185334	-0.582659	-0.695479	-0.472975	-0.74509	-0.2216	-0.68088	-0.830747	0.398089	-0.611909	-0.0531995	-0.00499738	-0.249161	0.316249	0.115928	5
T_45654_c0_g1	LOB	gi|571483990|ref|XP_006589417.1| PREDICTED: probable lysine-specific demethylase ELF6 [Glycine max] 0.0e+00	GO:0003676, nucleic acid binding;GO:0003700, DNA binding transcription factor activity;GO:0005634, nucleus;GO:0006351, transcription, DNA-templated;GO:0006355, regulation of transcription, DNA-templated;GO:0009741, response to brassinosteroid;GO:0009826, unidimensional cell growth;GO:0033169, histone H3-K9 demethylation;GO:0046872, metal ion binding;GO:0048577, negative regulation of short-day ph…	-	-0.252335	-0.83999	-0.836328	-0.355981	0.0599841	-0.697705	0.120145	-0.444335	0.035213	0.211461	-0.838272	0.379677	0.248485	-0.648894	0.0506906	-0.607676	0.285265	0.0778707	-0.455213	-0.803603	-0.433009	-0.524418	0.0268616	-0.400177	-0.509666	0.431487	-0.803814	-0.346401	-0.0597642	-0.355669	0.409863	-0.214641	5
T_43944_c0_g1	AP2/ERF->AP2/ERF-ERF	gi|734330765|gb|KHN06834.1| Myb-related protein B [Glycine soja] 2.4e-115	GO:0003677, DNA binding;GO:0003700, DNA binding transcription factor activity;GO:0005634, nucleus;GO:0006351, transcription, DNA-templated;GO:0007049, cell cycle	-	-0.116558	-0.910876	-0.848226	-0.508385	-0.0282693	-0.648416	-0.0489926	-0.638173	-0.17225	0.31836	-0.814475	0.471741	0.012467	-0.566708	-0.049046	-0.498533	0.333416	0.181736	-0.400056	-0.723021	-0.317129	-0.586458	0.03417	-0.433078	-0.486403	0.596716	-0.765202	-0.375955	0.0590196	-0.329744	0.351344	-0.29624	5
T_42433_c2_g5	GARP->GARP-G2-like	gi|659090303|ref|XP_008445943.1| PREDICTED: dr1-associated corepressor [Cucumis melo] 8.8e-30	GO:0000122, negative regulation of transcription by RNA polymerase II;GO:0003677, DNA binding;GO:0003700, DNA binding transcription factor activity;GO:0003714, transcription corepressor activity;GO:0005634, nucleus;GO:0006351, transcription, DNA-templated	-	-0.177865	-0.82715	-0.797803	-0.447351	0.221094	-0.762591	-0.071082	-0.431073	-0.00919223	0.229396	-0.832067	0.291606	0.325903	-0.637797	-0.0487117	-0.592536	0.403333	0.0347947	-0.428603	-0.687181	-0.555783	-0.554423	0.15758	-0.37551	-0.397103	0.582352	-0.70703	-0.321912	-0.0235284	-0.35492	0.424822	-0.154848	5
T_41770_c0_g1	WRKY	gi|255632970|gb|ACU16839.1| unknown [Glycine max] 4.4e-56	GO:0016021, integral component of membrane;GO:0046872, metal ion binding	-	-0.243848	-0.871315	-0.825503	-0.392586	0.0328742	-0.557017	-0.0847584	-0.627547	-0.285417	0.296755	-0.827189	0.427543	0.181074	-0.567233	-0.224758	-0.413057	0.510607	0.311091	-0.38872	-0.659648	-0.266515	-0.737398	-0.0778244	-0.536259	-0.592686	0.420604	-0.760452	-0.320073	-0.00210348	-0.43252	0.406641	-0.108905	5
T_43943_c4_g1	AP2/ERF->AP2/ERF-ERF	gi|947104548|gb|KRH52931.1| hypothetical protein GLYMA_06G095700 [Glycine max] 9.7e-61	GO:0000900, translation repressor activity, mRNA regulatory element binding;GO:0003677, DNA binding;GO:0003700, DNA binding transcription factor activity;GO:0005634, nucleus;GO:0006351, transcription, DNA-templated;GO:0009266, response to temperature stimulus;GO:0009910, negative regulation of flower development;GO:0030154, cell differentiation;GO:0045892, negative regulation of transcription, DN…	-	-0.204113	-0.855706	-0.883147	-0.339698	-0.0336344	-0.636219	0.110144	-0.409057	-0.195808	0.391242	-0.844454	0.365834	0.272455	-0.637966	-0.146816	-0.544965	0.406278	0.148109	-0.555155	-0.695437	-0.25404	-0.735155	0.057384	-0.440821	-0.582687	0.408445	-0.752696	-0.391475	-0.0275691	-0.359422	0.346917	-0.117616	5
T_38406_c0_g1	bZIP	gi|1012333293|gb|KYP44692.1| Protein FAR1-RELATED SEQUENCE 5, partial [Cajanus cajan] 5.9e-189	GO:0005634, nucleus;GO:0006355, regulation of transcription, DNA-templated;GO:0008270, zinc ion binding	-	0.00876259	-0.746755	-0.767091	-0.0524493	0.0963621	-0.545518	0.243438	-0.385861	0.02027	0.304203	-0.784888	0.412376	0.219847	-0.55718	-0.0792219	-0.520178	0.333542	0.257747	-0.367455	-0.72369	-0.262678	-0.481483	0.0122405	-0.340805	-0.45719	0.284524	-0.752055	-0.267217	0.111206	-0.218035	0.519043	0.00321627	5
T_22881_c0_g1	C2H2	gi|947046418|gb|KRG96047.1| hypothetical protein GLYMA_19G186200 [Glycine max] 5.1e-126	GO:0003700, DNA binding transcription factor activity;GO:0005634, nucleus;GO:0006351, transcription, DNA-templated;GO:0006355, regulation of transcription, DNA-templated;GO:0043565, sequence-specific DNA binding;GO:0044212, transcription regulatory region DNA binding;GO:0046872, metal ion binding	-	0.0863152	-0.701552	-0.793222	-0.144993	-0.0829813	-0.526258	0.0213456	-0.434471	-0.30526	0.628781	-0.849931	0.299201	0.308397	-0.675205	-0.427647	-0.607697	0.619213	0.229643	-0.535917	-0.720681	-0.393567	-0.570143	-0.0661892	-0.666731	-0.71481	0.202208	-0.503717	-0.114771	-0.12219	-0.115871	0.216189	0.142679	5
T_42858_c2_g1	LOB	gi|571563313|ref|XP_006605461.1| PREDICTED: G-box-binding factor 1-like isoform X1 [Glycine max] 6.2e-149	GO:0003677, DNA binding;GO:0003700, DNA binding transcription factor activity;GO:0005634, nucleus;GO:0005737, cytoplasm;GO:0006351, transcription, DNA-templated;GO:0010310, regulation of hydrogen peroxide metabolic process;GO:0010629, negative regulation of gene expression;GO:0043565, sequence-specific DNA binding;GO:0044212, transcription regulatory region DNA binding;GO:0090342, regulation of c…	-	-0.231303	-0.812776	-0.812748	-0.329477	-0.114614	-0.505063	0.0386998	-0.476839	-0.32955	0.435974	-0.797941	0.340236	0.313997	-0.608553	-0.21107	-0.446213	0.357983	0.263384	-0.393842	-0.71704	-0.184704	-0.639854	-0.100388	-0.605276	-0.701046	0.339119	-0.660643	-0.198882	0.0219508	-0.442211	0.231887	-0.02788	5
T_40518_c0_g3	B3->B3-ARF	gi|356562652|ref|XP_003549583.1| PREDICTED: transcription factor BIM1 isoform X2 [Glycine max] 7.1e-222	GO:0003677, DNA binding;GO:0005634, nucleus;GO:0006351, transcription, DNA-templated;GO:0006355, regulation of transcription, DNA-templated	-	-0.121387	-0.774757	-0.782421	-0.233089	0.165625	-0.657089	0.172913	-0.292887	0.190253	0.112	-0.798998	0.306509	0.311176	-0.578573	-0.0158701	-0.624426	0.310504	0.105627	-0.335289	-0.756825	-0.324993	-0.423142	0.153072	-0.236389	-0.346037	0.284324	-0.838903	-0.36981	0.0187583	-0.275196	0.530696	-0.0700069	5
T_37434_c0_g1	C2H2	gi|955350335|ref|XP_014619497.1| PREDICTED: protein FAR1-RELATED SEQUENCE 6 isoform X1 [Glycine max] 1.6e-139	GO:0005634, nucleus;GO:0006355, regulation of transcription, DNA-templated;GO:0008270, zinc ion binding	-	-0.239593	-0.844404	-0.82241	-0.382702	0.0374475	-0.680793	0.0842266	-0.464547	-0.139067	0.362447	-0.854591	0.399435	0.270072	-0.634508	0.00124109	-0.519568	0.356413	0.143761	-0.482351	-0.731241	-0.351382	-0.596109	0.0133397	-0.439955	-0.536984	0.6124	-0.764298	-0.316007	0.0484052	-0.389908	0.425803	-0.162854	5
T_42650_c1_g2	bZIP	gi|920712781|gb|KOM54030.1| hypothetical protein LR48_Vigan09g268900 [Vigna angularis] 3.4e-49	GO:0003677, DNA binding;GO:0003700, DNA binding transcription factor activity;GO:0005634, nucleus;GO:0006351, transcription, DNA-templated;GO:0043565, sequence-specific DNA binding	K14432-ko04075 Plant hormone signal transduction	-0.495691	-0.828956	-0.79893	-0.473686	-0.262429	-0.58106	0.198944	-0.313111	-0.0591309	0.0856174	-0.688418	0.385256	0.140974	-0.658817	-0.0328356	-0.445026	0.158342	-0.0284304	-0.55562	-0.721164	-0.0236378	-0.780308	0.0263716	-0.474567	-0.522634	0.361597	-0.817607	-0.471313	-0.0849881	-0.498661	0.235908	-0.39574	5
T_44204_c1_g1	HB->HB-HD-ZIP	gi|356548619|ref|XP_003542698.1| PREDICTED: homeobox-leucine zipper protein HAT5 isoform X2 [Glycine max] 1.1e-60	GO:0003700, DNA binding transcription factor activity;GO:0005634, nucleus;GO:0006351, transcription, DNA-templated;GO:0009637, response to blue light;GO:0009651, response to salt stress;GO:0009965, leaf morphogenesis;GO:0042803, protein homodimerization activity;GO:0043565, sequence-specific DNA binding;GO:0045893, positive regulation of transcription, DNA-templated	-	-0.089205	-0.735068	-0.785796	-0.214173	0.123648	-0.604404	-0.0842625	-0.431727	-0.353862	0.409255	-0.814876	0.407563	0.468754	-0.6139	-0.36	-0.459068	0.596585	0.210301	-0.488581	-0.613778	-0.453431	-0.813757	-0.285603	-0.6988	-0.825743	0.303989	-0.605246	-0.0259349	0.0306165	-0.305958	0.396086	0.11274	5
T_45818_c2_g1	FAR1	gi|356523487|ref|XP_003530369.1| PREDICTED: protein FAR1-RELATED SEQUENCE 3-like isoform X1 [Glycine max] 0.0e+00	GO:0005634, nucleus;GO:0006355, regulation of transcription, DNA-templated;GO:0008270, zinc ion binding;GO:0009506, plasmodesma	-	-0.108511	-0.789123	-0.804887	-0.248716	0.205553	-0.759095	0.0548219	-0.26447	0.0274279	0.256989	-0.831558	0.0829337	0.579575	-0.730758	-0.256406	-0.647838	0.540841	0.13292	-0.481187	-0.686712	-0.542885	-0.641437	0.147348	-0.456876	-0.466547	0.391772	-0.676668	-0.280177	-0.215842	-0.314868	0.367872	0.0929515	5
T_41408_c2_g3	NAC	gi|1012350205|gb|KYP61394.1| NAC domain-containing protein 8 [Cajanus cajan] 1.4e-215	GO:0003677, DNA binding;GO:0003700, DNA binding transcription factor activity;GO:0005634, nucleus;GO:0006351, transcription, DNA-templated;GO:0006355, regulation of transcription, DNA-templated;GO:0044212, transcription regulatory region DNA binding;GO:0045893, positive regulation of transcription, DNA-templated;GO:2000652, regulation of secondary cell wall biogenesis	-	-0.27153	-0.777798	-0.790816	-0.292341	0.0421883	-0.600355	0.0370061	-0.363068	-0.199764	0.445346	-0.827732	0.24512	0.448047	-0.748622	-0.219952	-0.510908	0.473914	0.0770085	-0.507869	-0.716165	-0.390289	-0.685169	0.078454	-0.661669	-0.58369	0.406628	-0.585152	-0.165847	-0.045922	-0.488888	0.279927	-0.0396488	5
T_43375_c1_g5	C2H2	gi|356518046|ref|XP_003527695.1| PREDICTED: protein indeterminate-domain 2-like [Glycine max] 2.5e-98	GO:0003676, nucleic acid binding;GO:0003677, DNA binding;GO:0003700, DNA binding transcription factor activity;GO:0006351, transcription, DNA-templated;GO:0006355, regulation of transcription, DNA-templated;GO:0046872, metal ion binding	-	-0.108636	0.70299	0.787429	0.214886	0.124327	0.662294	-0.0781627	0.391479	0.267535	-0.581789	0.789882	-0.304214	-0.35256	0.668968	0.243872	0.607227	-0.462091	-0.151033	0.593307	0.719939	0.495767	0.594236	0.255451	0.682749	0.826496	-0.403066	0.521729	0.0308631	0.135182	0.057816	-0.138752	-0.0300373	5
T_43459_c0_g2	WRKY	gi|571471003|ref|XP_006585175.1| PREDICTED: WRKY48 protein isoform X1 [Glycine max] 1.2e-102	GO:0003700, DNA binding transcription factor activity;GO:0005634, nucleus;GO:0006351, transcription, DNA-templated;GO:0043565, sequence-specific DNA binding	-	0.0165799	0.741568	0.836401	0.280863	0.0205874	0.657391	-0.0633471	0.428457	0.00216743	-0.375102	0.874256	-0.453232	-0.123667	0.624977	0.150366	0.678719	-0.356979	0.017634	0.533673	0.849572	0.288339	0.539225	-0.0539676	0.455959	0.523334	-0.299754	0.771023	0.254132	-0.154077	0.025013	-0.300078	0.161258	5
T_43989_c0_g1	AP2/ERF->AP2/ERF-ERF	gi|593696876|ref|XP_007148920.1| hypothetical protein PHAVU_005G025300g [Phaseolus vulgaris] 3.7e-88	GO:0003676, nucleic acid binding;GO:0003700, DNA binding transcription factor activity;GO:0003723, RNA binding;GO:0005634, nucleus;GO:0005730, nucleolus;GO:0006351, transcription, DNA-templated;GO:0007275, multicellular organism development;GO:0008097, 5S rRNA binding;GO:0046872, metal ion binding;GO:0080084, 5S rDNA binding	-	-0.301853	-0.66328	-0.752872	-0.169299	-0.0242156	-0.621505	0.16123	-0.179081	-0.112623	0.287878	-0.768403	0.421558	0.459734	-0.696045	-0.197728	-0.531378	0.360342	-0.0336004	-0.592654	-0.71163	-0.343968	-0.770591	-0.206571	-0.596896	-0.761297	0.258358	-0.694095	-0.150243	0.0247891	-0.314161	0.368062	-0.0193094	5
T_36051_c0_g1	AP2/ERF->AP2/ERF-ERF	gi|955312750|ref|XP_014629391.1| PREDICTED: uncharacterized protein LOC778152 isoform X1 [Glycine max] 4.8e-194	GO:0003700, DNA binding transcription factor activity;GO:0005634, nucleus;GO:0006351, transcription, DNA-templated;GO:0043565, sequence-specific DNA binding	-	-0.0681382	-0.669251	-0.80851	-0.315256	-0.223281	-0.677364	0.260576	-0.177377	0.0706741	0.383614	-0.794681	0.541935	0.0686679	-0.619	0.0286192	-0.705373	0.154988	-0.256688	-0.678957	-0.839099	-0.131739	-0.495204	0.0805932	-0.353238	-0.516638	0.376611	-0.774603	-0.309558	0.19729	0.0283453	0.252095	-0.317917	5
T_41259_c2_g5	SBP	gi|593331990|ref|XP_007139421.1| hypothetical protein PHAVU_008G028000g [Phaseolus vulgaris] 7.8e-58	GO:0003677, DNA binding;GO:0003700, DNA binding transcription factor activity;GO:0005634, nucleus;GO:0006351, transcription, DNA-templated;GO:0009723, response to ethylene;GO:0009739, response to gibberellin;GO:0009751, response to salicylic acid;GO:0009753, response to jasmonic acid;GO:0010200, response to chitin;GO:0046686, response to cadmium ion	-	-0.0152288	-0.686426	-0.752577	-0.391362	-0.200913	-0.725504	0.264533	-0.274731	0.0979592	0.351814	-0.773065	0.443634	0.0276607	-0.649763	0.129735	-0.679326	0.145294	-0.250716	-0.667118	-0.841483	-0.246501	-0.420406	0.033556	-0.394029	-0.47518	0.472216	-0.724805	-0.271083	0.137346	0.0212333	0.293825	-0.410647	5
T_41128_c0_g3	C2H2	gi|571469021|ref|XP_006584554.1| PREDICTED: uncharacterized protein LOC100786580 isoform X1 [Glycine max] 1.9e-98	GO:0003677, DNA binding;GO:0003700, DNA binding transcription factor activity;GO:0005634, nucleus;GO:0006351, transcription, DNA-templated;GO:0009908, flower development;GO:0009933, meristem structural organization;GO:0010582, floral meristem determinacy;GO:0030154, cell differentiation;GO:0045893, positive regulation of transcription, DNA-templated;GO:0046982, protein heterodimerization activity	-	-0.345089	-0.718706	-0.762527	-0.353048	-0.115292	-0.737512	0.204899	-0.0276289	0.160976	0.141911	-0.693077	0.233484	0.337752	-0.794991	-0.121835	-0.669085	0.230236	-0.249169	-0.675509	-0.702113	-0.383848	-0.671334	0.28689	-0.379695	-0.378441	0.43277	-0.653057	-0.478275	-0.262347	-0.330066	0.186704	-0.24056	5
T_46217_c0_g2	HB->HB-other	gi|356502193|ref|XP_003519905.1| PREDICTED: homeobox-leucine zipper protein ATHB-40-like [Glycine max] 1.9e-67	GO:0003700, DNA binding transcription factor activity;GO:0005634, nucleus;GO:0006351, transcription, DNA-templated;GO:0006355, regulation of transcription, DNA-templated;GO:0009733, response to auxin;GO:0043565, sequence-specific DNA binding	-	-0.00352724	-0.785383	-0.769311	-0.36966	0.0244433	-0.619613	0.0907926	-0.481789	-0.0867228	0.269433	-0.773806	0.540409	0.0333681	-0.517116	0.0208032	-0.495733	0.232854	0.0407726	-0.421376	-0.71197	-0.251725	-0.533064	-0.0768719	-0.367873	-0.512762	0.398609	-0.761849	-0.265823	0.290671	-0.196134	0.533668	-0.272584	5
T_32213_c0_g1	FAR1	gi|922402835|ref|XP_013468553.1| FAR1 DNA-binding domain protein [Medicago truncatula] 3.1e-43	GO:0003677, DNA binding;GO:0005634, nucleus;GO:0006355, regulation of transcription, DNA-templated;GO:0008270, zinc ion binding	-	0.201522	-0.59236	-0.657389	-0.104657	0.184996	-0.796979	0.181261	-0.173909	0.133271	0.218588	-0.760764	0.166404	0.452923	-0.706311	-0.158528	-0.747238	0.373102	-0.0574732	-0.618634	-0.684299	-0.731668	-0.416889	-0.0488635	-0.375861	-0.510586	0.249956	-0.505247	-0.151855	-0.159966	0.0907108	0.474355	0.0786703	5
T_40175_c0_g1	OFP	gi|734437043|gb|KHN48405.1| hypothetical protein glysoja_042270 [Glycine soja] 2.8e-172	GO:0003677, DNA binding;GO:0005634, nucleus;GO:0006351, transcription, DNA-templated;GO:0045892, negative regulation of transcription, DNA-templated;GO:2000652, regulation of secondary cell wall biogenesis	-	0.103908	-0.699556	-0.773774	-0.172831	-0.125824	-0.539853	0.0336319	-0.411305	-0.195325	0.580042	-0.777117	0.360771	0.153735	-0.735429	-0.410842	-0.560934	0.488294	0.0261098	-0.564237	-0.759324	-0.32791	-0.679367	0.0216493	-0.758517	-0.613433	0.265232	-0.499653	-0.0743766	0.0601154	-0.112125	0.130162	-0.0734935	5
T_43203_c0_g6	GRAS	gi|571548957|ref|XP_006602878.1| PREDICTED: ethylene-responsive transcription factor 1-like [Glycine max] 1.7e-73	GO:0003677, DNA binding;GO:0003700, DNA binding transcription factor activity;GO:0005634, nucleus;GO:0006351, transcription, DNA-templated;GO:0006952, defense response;GO:0009873, ethylene-activated signaling pathway;GO:0010200, response to chitin	-	-0.129956	-0.650046	-0.762541	-0.23206	-0.339593	-0.676964	0.508711	0.157161	0.395988	0.0843368	-0.599795	0.0962365	0.152855	-0.661548	-0.00817364	-0.799438	-0.099492	-0.240952	-0.692318	-0.723486	-0.0246793	-0.413586	0.564838	0.038879	-0.116478	0.245287	-0.700002	-0.747591	-0.293869	0.0171824	-0.0143513	-0.246259	5
T_41026_c0_g1	bZIP	gi|571497310|ref|XP_006593862.1| PREDICTED: transcriptional adapter ADA2a-like isoform X5 [Glycine max] 3.7e-271	GO:0003677, DNA binding;GO:0003682, chromatin binding;GO:0003700, DNA binding transcription factor activity;GO:0003713, transcription coactivator activity;GO:0005634, nucleus;GO:0006338, chromatin remodeling;GO:0006351, transcription, DNA-templated;GO:0006357, regulation of transcription by RNA polymerase II;GO:0008270, zinc ion binding;GO:0016573, histone acetylation;GO:0035066, positive regulat…	-	-0.110663	-0.632384	-0.708611	-0.360933	-0.0863492	-0.744384	0.324543	-0.0109245	0.309473	0.170433	-0.680306	0.257258	0.124454	-0.605519	0.1153	-0.700752	0.0906424	-0.348268	-0.598916	-0.714003	-0.219044	-0.474252	0.242981	-0.0807784	-0.269854	0.368773	-0.8009	-0.523922	0.102557	-0.0133534	0.358243	-0.344198	5
T_41036_c1_g1	bZIP	gi|566006193|ref|NP_001274388.1| heat shock factor protein HSF30-like [Glycine max] 6.1e-165	GO:0003700, DNA binding transcription factor activity;GO:0005634, nucleus;GO:0006351, transcription, DNA-templated;GO:0043565, sequence-specific DNA binding	-	-0.21569	-0.790713	-0.80446	-0.466456	-0.153169	-0.627162	0.225861	-0.233431	0.117616	0.25134	-0.728562	0.519829	-0.0601746	-0.577072	0.148043	-0.594721	0.0508563	-0.213285	-0.495526	-0.751034	-0.0988502	-0.463527	0.321964	-0.166458	-0.272852	0.496518	-0.811427	-0.549139	0.205336	-0.290046	0.369212	-0.462837	5
T_44159_c0_g2	NAC	gi|955374492|ref|XP_003549188.2| PREDICTED: NAC domain-containing protein 86-like isoform X1 [Glycine max] 6.3e-140	GO:0003677, DNA binding;GO:0003700, DNA binding transcription factor activity;GO:0005634, nucleus;GO:0006351, transcription, DNA-templated;GO:0006355, regulation of transcription, DNA-templated;GO:0090602, sieve element enucleation;GO:0090603, sieve element differentiation	-	-0.247056	-0.73484	-0.726115	-0.457953	-0.17821	-0.742352	0.173277	-0.143548	-0.046247	0.143578	-0.61277	-0.0508711	0.464802	-0.700808	-0.107935	-0.553663	0.253718	-0.0299402	-0.662834	-0.571179	-0.32353	-0.705248	0.0816223	-0.450621	-0.494002	0.448103	-0.548063	-0.367374	-0.463134	-0.303126	0.00819369	-0.185707	5
T_39604_c2_g3	MYB->MYB-related	gi|356528396|ref|XP_003532789.1| PREDICTED: transcription factor EGL1-like [Glycine max] 0.0e+00	GO:0001708, cell fate specification;GO:0003677, DNA binding;GO:0003700, DNA binding transcription factor activity;GO:0005634, nucleus;GO:0006351, transcription, DNA-templated;GO:0007275, multicellular organism development;GO:0008152, metabolic process;GO:0009957, epidermal cell fate specification;GO:0010091, trichome branching;GO:0016597, amino acid binding	-	-0.418983	-0.740218	-0.749339	-0.281285	0.116117	-0.432873	-0.160848	-0.529402	-0.429525	0.480116	-0.784251	0.49105	0.336373	-0.52809	-0.197212	-0.296456	0.456093	0.24785	-0.308502	-0.584896	-0.32068	-0.72551	-0.125128	-0.61135	-0.68626	0.474206	-0.606664	-0.114225	0.179049	-0.601678	0.316029	0.0107865	4
T_42048_c0_g1	C2H2	gi|571521110|ref|XP_006598111.1| PREDICTED: neurofilament medium polypeptide-like [Glycine max] 1.0e-51	GO:0000166, nucleotide binding;GO:0000783, nuclear telomere cap complex;GO:0003691, double-stranded telomeric DNA binding;GO:0003723, RNA binding;GO:0005634, nucleus;GO:0006351, transcription, DNA-templated;GO:0006355, regulation of transcription, DNA-templated;GO:0008270, zinc ion binding;GO:0009507, chloroplast;GO:0031627, telomeric loop formation	-	-0.413897	-0.77733	-0.748809	-0.333228	-0.108805	-0.540223	0.0908655	-0.337594	-0.0548044	0.181652	-0.691045	0.284392	0.290189	-0.758569	-0.160089	-0.451505	0.21149	-0.0203594	-0.469531	-0.756515	-0.245218	-0.690971	0.123354	-0.676738	-0.485195	0.330958	-0.598084	-0.222967	-0.0942522	-0.562696	0.122493	-0.24753	4
T_45520_c2_g1	NF-Y->NF-YC	gi|734364283|gb|KHN17184.1| Transcription factor bHLH74 [Glycine soja] 2.3e-179	GO:0003677, DNA binding;GO:0003700, DNA binding transcription factor activity;GO:0005634, nucleus;GO:0006351, transcription, DNA-templated;GO:0006355, regulation of transcription, DNA-templated;GO:0009637, response to blue light;GO:0040008, regulation of growth	-	-0.12537	-0.726309	-0.769979	-0.261047	0.216712	-0.650889	-0.0794556	-0.405974	-0.053937	0.269198	-0.858399	0.448459	0.337255	-0.532731	-0.152012	-0.581438	0.51774	0.169152	-0.399766	-0.674061	-0.418002	-0.467834	0.0845192	-0.35864	-0.43775	0.486712	-0.721393	-0.232172	0.0207369	-0.212962	0.459845	0.0385623	4
T_46868_c1_g9	DDT	gi|920679431|gb|KOM26328.1| hypothetical protein LR48_Vigan252s004000 [Vigna angularis] 1.0e-178	GO:0003676, nucleic acid binding;GO:0003700, DNA binding transcription factor activity;GO:0005634, nucleus;GO:0006351, transcription, DNA-templated;GO:0006355, regulation of transcription, DNA-templated;GO:0009630, gravitropism;GO:0009965, leaf morphogenesis;GO:0010601, positive regulation of auxin biosynthetic process;GO:0043621, protein self-association;GO:0044212, transcription regulatory regi…	-	-0.218692	-0.775672	-0.781169	-0.348693	0.281726	-0.696496	-0.125939	-0.463955	-0.145863	0.215049	-0.826109	0.306414	0.419906	-0.595182	-0.172552	-0.494817	0.443091	0.0973013	-0.446093	-0.630331	-0.480937	-0.733346	0.000893684	-0.474979	-0.523769	0.431604	-0.685016	-0.203053	0.0803541	-0.346491	0.411461	-0.042724	4
T_42296_c0_g2	C2H2	gi|571562547|ref|XP_006605343.1| PREDICTED: uncharacterized protein LOC100787422 isoform X1 [Glycine max] 5.6e-224	GO:0000077, DNA damage checkpoint;GO:0003677, DNA binding;GO:0003700, DNA binding transcription factor activity;GO:0005634, nucleus;GO:0006351, transcription, DNA-templated;GO:0006355, regulation of transcription, DNA-templated;GO:0010332, response to gamma radiation;GO:0040020, regulation of meiotic nuclear division	-	-0.133245	-0.721205	-0.710288	-0.289077	0.169437	-0.538738	-0.160575	-0.558109	-0.289736	0.317998	-0.768603	0.546879	0.181099	-0.341442	-0.122288	-0.381792	0.428104	0.399651	-0.249237	-0.5115	-0.346478	-0.5013	-0.147855	-0.237695	-0.534397	0.617528	-0.71645	-0.292691	0.143506	-0.23748	0.477265	0.0781835	4
T_41248_c2_g2	SBP	gi|356531243|ref|XP_003534187.1| PREDICTED: trihelix transcription factor ASIL2-like [Glycine max] 1.0e-139	GO:0003677, DNA binding;GO:0003700, DNA binding transcription factor activity;GO:0005634, nucleus;GO:0006351, transcription, DNA-templated;GO:0006355, regulation of transcription, DNA-templated;GO:0009793, embryo development ending in seed dormancy;GO:0010431, seed maturation	-	0.151344	0.712845	0.680815	0.157144	-0.0659637	0.276915	0.247637	0.751801	0.555017	-0.471869	0.705067	-0.394158	-0.1778	0.454892	0.450734	0.215791	-0.546268	-0.541877	0.181708	0.517051	0.320841	0.696082	0.274499	0.688784	0.724361	-0.212443	0.465496	0.0640223	-0.0466874	0.440681	-0.23278	-0.159702	4
T_40634_c3_g1	MYB->MYB	gi|356557351|ref|XP_003546980.1| PREDICTED: protein NLP8-like [Glycine max] 0.0e+00	GO:0003677, DNA binding;GO:0003700, DNA binding transcription factor activity;GO:0005634, nucleus;GO:0006351, transcription, DNA-templated;GO:0006355, regulation of transcription, DNA-templated	-	-0.131844	-0.670482	-0.739247	-0.14425	0.39715	-0.704638	-0.0426868	-0.280632	0.052541	0.221066	-0.857552	0.265115	0.565208	-0.591227	-0.200388	-0.623793	0.550553	0.11527	-0.38163	-0.659943	-0.588808	-0.535561	0.0522333	-0.342886	-0.463911	0.334304	-0.715678	-0.189961	0.0172662	-0.22023	0.535433	0.182586	4
T_44021_c0_g2	TCP	gi|571558670|ref|XP_003553569.2| PREDICTED: uncharacterized protein LOC100803083 isoform X1 [Glycine max] 2.0e-73	-	-	-0.137878	-0.818258	-0.831302	-0.166617	-0.378647	-0.571516	0.401726	-0.218896	0.0696887	0.238616	-0.67059	0.162265	0.2204	-0.845301	-0.2483	-0.622627	0.135093	0.0809967	-0.616026	-0.840184	-0.149686	-0.651887	0.196987	-0.595473	-0.487939	0.187275	-0.608807	-0.398725	-0.367708	-0.311064	-0.0297923	-0.184294	4
T_42610_c1_g2	HB->HB-WOX	gi|593459874|ref|XP_007140690.1| hypothetical protein PHAVU_008G133600g [Phaseolus vulgaris] 5.4e-130	GO:0003677, DNA binding;GO:0003700, DNA binding transcription factor activity;GO:0005634, nucleus;GO:0006351, transcription, DNA-templated;GO:0006355, regulation of transcription, DNA-templated;GO:0009637, response to blue light	-	0.20451	0.718614	0.563026	0.755988	0.116349	0.5187	0.0445447	0.469722	-0.0702151	0.195947	0.401652	-0.224507	0.278291	0.14665	-0.328193	0.318317	0.0513351	-0.0976311	0.160271	0.35626	0.0393307	0.232114	-0.192208	-0.204177	0.016257	-0.556157	0.703988	0.702667	0.1641	0.232308	-0.219665	0.560778	4
T_42806_c1_g4	FAR1	gi|351724059|ref|NP_001238580.1| uncharacterized protein LOC100499957 [Glycine max] 9.8e-114	GO:0005737, cytoplasm;GO:0005856, cytoskeleton;GO:0005886, plasma membrane;GO:0008270, zinc ion binding;GO:0051015, actin filament binding;GO:0051017, actin filament bundle assembly	-	0.157509	-0.789572	-0.798972	-0.10842	-0.20903	-0.566857	0.161347	-0.458747	-0.123109	0.442063	-0.702466	0.16652	0.12058	-0.711318	-0.412264	-0.568067	0.39388	0.334005	-0.546564	-0.688013	-0.329766	-0.651854	0.121467	-0.546103	-0.479212	0.359832	-0.510963	-0.352224	-0.32694	-0.0756014	-0.00750235	0.00566223	4
T_39855_c1_g1	MYB->MYB	gi|571474019|ref|XP_003532145.2| PREDICTED: zinc finger CCCH domain-containing protein 18-like [Glycine max] 4.4e-204	GO:0003676, nucleic acid binding;GO:0003677, DNA binding;GO:0046872, metal ion binding	-	0.0532835	-0.548255	-0.599988	-0.154689	0.399707	-0.703974	-0.191597	-0.439167	-0.158806	0.230012	-0.772325	0.3564	0.527613	-0.497052	-0.181097	-0.514635	0.535752	0.154028	-0.3989	-0.565901	-0.787913	-0.481239	-0.397288	-0.529246	-0.708037	0.38857	-0.506017	0.142508	0.0380696	-0.0264586	0.505271	0.195307	4
T_41352_c0_g1	LOB	gi|356543598|ref|XP_003540247.1| PREDICTED: uncharacterized protein LOC100810396 [Glycine max] 7.8e-228	GO:0003677, DNA binding;GO:0003700, DNA binding transcription factor activity;GO:0005634, nucleus;GO:0006351, transcription, DNA-templated;GO:0006355, regulation of transcription, DNA-templated	-	-0.334511	-0.750009	-0.756658	-0.384161	0.102206	-0.644234	-0.10041	-0.457053	-0.252956	0.324113	-0.786068	0.258541	0.442172	-0.612438	-0.16175	-0.435401	0.521799	0.144766	-0.484436	-0.611913	-0.429008	-0.751553	-0.121189	-0.611485	-0.645022	0.505396	-0.643301	-0.150941	-0.104225	-0.416451	0.256552	-0.0644107	4
T_43643_c0_g1	MADS->MADS-M-type	gi|571508161|ref|XP_006595949.1| PREDICTED: B3 domain-containing protein Os01g0723500-like [Glycine max] 2.5e-138	GO:0003677, DNA binding;GO:0005634, nucleus;GO:0006351, transcription, DNA-templated;GO:0006355, regulation of transcription, DNA-templated	-	-0.00437445	-0.703747	-0.75723	-0.156739	0.418439	-0.736814	-0.0984786	-0.449044	-0.140728	0.33184	-0.901856	0.402715	0.526451	-0.546877	-0.168184	-0.568652	0.575881	0.226749	-0.422452	-0.637506	-0.661923	-0.565709	-0.162975	-0.42803	-0.621424	0.480289	-0.678817	-0.0630894	0.118602	-0.154493	0.601648	0.193702	4
T_39792_c2_g2	HB->HB-HD-ZIP	gi|734378582|gb|KHN22139.1| Transcription factor bHLH25 [Glycine soja] 5.4e-107	GO:0003677, DNA binding;GO:0003700, DNA binding transcription factor activity;GO:0005634, nucleus;GO:0006351, transcription, DNA-templated;GO:0006355, regulation of transcription, DNA-templated;GO:0032440, 2-alkenal reductase [NAD(P)] activity	-	-0.0305969	-0.798283	-0.815369	-0.275303	0.341714	-0.701425	-0.133173	-0.415914	-0.166302	0.380667	-0.866706	0.323377	0.47714	-0.613696	-0.244145	-0.581417	0.529346	0.166391	-0.367406	-0.62904	-0.646443	-0.60706	0.0553509	-0.434022	-0.549968	0.441908	-0.620562	-0.18895	0.0635964	-0.345939	0.49705	0.118699	4
T_45248_c4_g1	WRKY	gi|356511998|ref|XP_003524708.1| PREDICTED: transcription factor bHLH18-like [Glycine max] 1.3e-127	GO:0003677, DNA binding;GO:0003700, DNA binding transcription factor activity;GO:0005634, nucleus;GO:0006351, transcription, DNA-templated;GO:0006355, regulation of transcription, DNA-templated	-	-0.00739514	-0.70874	-0.829102	-0.0960971	-0.212774	-0.460931	0.124449	-0.417107	-0.23668	0.59176	-0.774688	0.434764	0.135382	-0.562653	-0.292405	-0.55369	0.396142	0.266012	-0.47438	-0.729778	-0.192222	-0.58903	-0.0712129	-0.512186	-0.688867	0.257864	-0.639847	-0.242179	-0.0352967	-0.0982605	0.0794547	0.0379206	4
T_44083_c2_g3	TCP	gi|643720810|gb|KDP31074.1| hypothetical protein JCGZ_11450 [Jatropha curcas] 6.0e-54	GO:0003700, DNA binding transcription factor activity;GO:0005634, nucleus;GO:0006355, regulation of transcription, DNA-templated;GO:0009736, cytokinin-activated signaling pathway;GO:0010094, specification of carpel identity;GO:0043565, sequence-specific DNA binding	-	-0.0754045	-0.745197	-0.769981	-0.184351	0.0242468	-0.580871	-0.00595525	-0.331028	-0.270505	0.431007	-0.704277	0.109894	0.541683	-0.681737	-0.381672	-0.488752	0.494789	0.263001	-0.443149	-0.581828	-0.500208	-0.722211	-0.0537249	-0.664103	-0.685392	0.326479	-0.449985	-0.107333	-0.285218	-0.387486	0.0890488	0.15254	4
T_39629_c2_g1	MYB->MYB-related	gi|950938332|ref|XP_014522771.1| PREDICTED: scarecrow-like protein 4 isoform X2 [Vigna radiata var. radiata] 1.8e-193	GO:0003700, DNA binding transcription factor activity;GO:0005634, nucleus;GO:0006351, transcription, DNA-templated;GO:0006355, regulation of transcription, DNA-templated;GO:0043565, sequence-specific DNA binding	-	0.0838191	0.826551	0.836313	0.551371	0.021715	0.638728	0.0426186	0.516286	0.0960849	-0.330141	0.7613	-0.307481	0.0396308	0.403648	-0.0246485	0.564196	-0.26181	-0.106357	0.39293	0.609187	0.208888	0.503756	-0.224133	0.0780639	0.319675	-0.509637	0.788221	0.589554	-0.0439002	0.138724	-0.229676	0.286378	4
T_40928_c2_g4	S1Fa-like	gi|571545007|ref|XP_006602294.1| PREDICTED: homeotic protein proboscipedia-like isoform X1 [Glycine max] 6.7e-268	GO:0003677, DNA binding;GO:0003700, DNA binding transcription factor activity;GO:0005634, nucleus;GO:0006351, transcription, DNA-templated;GO:0009908, flower development	-	-0.269036	-0.796663	-0.809243	-0.46788	0.149123	-0.751526	-0.136011	-0.396759	-0.128124	0.30883	-0.873746	0.210263	0.462373	-0.66672	-0.199838	-0.622469	0.549345	0.0770211	-0.477021	-0.683708	-0.544107	-0.623412	0.0745357	-0.464698	-0.5395	0.519626	-0.697464	-0.30509	-0.152001	-0.346821	0.328212	-0.0205612	4
T_30851_c0_g1	bZIP	gi|356510955|ref|XP_003524198.1| PREDICTED: ethylene-responsive transcription factor RAP2-11-like [Glycine max] 1.4e-100	GO:0000302, response to reactive oxygen species;GO:0003677, DNA binding;GO:0003700, DNA binding transcription factor activity;GO:0005634, nucleus;GO:0006351, transcription, DNA-templated;GO:0009723, response to ethylene;GO:0009873, ethylene-activated signaling pathway;GO:0035865, cellular response to potassium ion;GO:0043565, sequence-specific DNA binding;GO:0048528, post-embryonic root developme…	-	-0.0429331	-0.835618	-0.883986	-0.358466	-0.19625	-0.64712	0.129499	-0.350687	-0.0452792	0.378744	-0.73566	0.274243	0.0642836	-0.695928	-0.204263	-0.662753	0.188924	-0.0241497	-0.579196	-0.742879	-0.316019	-0.674843	0.243086	-0.388575	-0.46514	0.319367	-0.636163	-0.496942	-0.123923	-0.184359	0.0409408	-0.249566	4
T_39863_c1_g5	MYB->MYB	gi|965657212|dbj|BAT73631.1| hypothetical protein VIGAN_01113900 [Vigna angularis var. angularis] 1.1e-53	GO:0003700, DNA binding transcription factor activity;GO:0009845, seed germination;GO:0043565, sequence-specific DNA binding;GO:0044212, transcription regulatory region DNA binding;GO:0046982, protein heterodimerization activity	-	0.0283853	-0.778677	-0.709782	-0.408682	0.27661	-0.704759	-0.166854	-0.526064	-0.0484238	0.18136	-0.758414	0.167035	0.300735	-0.522148	-0.173869	-0.507333	0.598546	0.242007	-0.310182	-0.559532	-0.544494	-0.509534	0.0545765	-0.377846	-0.355531	0.516369	-0.650316	-0.249277	-0.139388	-0.226752	0.444399	-0.0361317	4
T_43064_c0_g1	C3H	gi|502126565|ref|XP_004499355.1| PREDICTED: PHD finger protein Alfin1 [Cicer arietinum] 6.7e-114	GO:0003677, DNA binding;GO:0005634, nucleus;GO:0006351, transcription, DNA-templated;GO:0006355, regulation of transcription, DNA-templated;GO:0008270, zinc ion binding;GO:0009651, response to salt stress;GO:0045727, positive regulation of translation;GO:0071472, cellular response to salt stress	-	0.0396261	-0.77896	-0.796521	-0.256032	0.317712	-0.716614	-0.121635	-0.389279	-0.150006	0.203067	-0.84168	0.406904	0.462535	-0.510877	-0.273647	-0.601028	0.578288	0.287038	-0.374206	-0.560869	-0.610774	-0.556301	-0.0771635	-0.304642	-0.582754	0.383377	-0.683042	-0.262151	-0.0844572	-0.211734	0.617455	0.200184	4
T_41646_c0_g1	CPP	gi|356509771|ref|XP_003523619.1| PREDICTED: uncharacterized protein LOC100779731 isoform X1 [Glycine max] 6.6e-10	GO:0003700, DNA binding transcription factor activity;GO:0005634, nucleus;GO:0006351, transcription, DNA-templated;GO:0043565, sequence-specific DNA binding	-	-0.238325	-0.814161	-0.780222	-0.367304	-0.120604	-0.636978	0.0712161	-0.386462	-0.0538751	0.200884	-0.671899	0.370097	0.145396	-0.629776	-0.150248	-0.447873	0.320026	0.116671	-0.452667	-0.658673	-0.276726	-0.771907	-0.0407062	-0.495741	-0.528669	0.541928	-0.761632	-0.371305	-0.105509	-0.353355	0.212552	-0.244851	4
T_42266_c0_g1	bHLH	gi|356559901|ref|XP_003548234.1| PREDICTED: transcription factor bHLH118-like [Glycine max] 1.2e-97	GO:0000977, RNA polymerase II regulatory region sequence-specific DNA binding;GO:0003677, DNA binding;GO:0006351, transcription, DNA-templated;GO:0006357, regulation of transcription by RNA polymerase II;GO:0090575, RNA polymerase II transcription factor complex	-	0.00408313	-0.794492	-0.775687	-0.303745	0.218277	-0.774733	0.0340069	-0.329682	-0.070575	0.167036	-0.797283	0.20202	0.486249	-0.653477	-0.211174	-0.596308	0.506309	0.147858	-0.533556	-0.592623	-0.565637	-0.648074	0.00811777	-0.410443	-0.513549	0.389016	-0.628482	-0.274185	-0.19223	-0.251611	0.51923	0.0363987	4
T_43628_c1_g6	C2H2	gi|356500393|ref|XP_003519016.1| PREDICTED: uncharacterized protein LOC100802183 [Glycine max] 8.1e-203	GO:0004842, ubiquitin-protein transferase activity;GO:0005737, cytoplasm;GO:0008270, zinc ion binding	-	0.0378854	-0.716727	-0.783694	-0.122862	0.14374	-0.708618	0.00547608	-0.312569	-0.202813	0.3046	-0.789246	0.225984	0.588516	-0.626975	-0.364712	-0.610392	0.576662	0.303595	-0.562695	-0.568164	-0.613142	-0.661574	-0.136698	-0.498224	-0.698167	0.340857	-0.530203	-0.163177	-0.35026	-0.140875	0.305018	0.262634	4
T_46705_c0_g1	HB->HB-PHD	gi|734330565|gb|KHN06779.1| Homeobox protein HAT3.1 [Glycine soja] 0.0e+00	GO:0003677, DNA binding;GO:0003700, DNA binding transcription factor activity;GO:0005634, nucleus;GO:0006351, transcription, DNA-templated;GO:0008270, zinc ion binding;GO:0043565, sequence-specific DNA binding;GO:0045893, positive regulation of transcription, DNA-templated	-	-0.246575	-0.728258	-0.797682	-0.239488	0.151357	-0.639142	0.00449601	-0.257639	-0.00586589	0.422842	-0.827958	0.437074	0.303816	-0.672402	-0.123619	-0.621568	0.287157	-0.0718061	-0.43667	-0.727881	-0.495731	-0.537853	0.284338	-0.346113	-0.405091	0.522213	-0.645651	-0.328451	0.154597	-0.359307	0.321025	-0.0544713	4
T_46711_c1_g1	NAC	gi|734361921|gb|KHN15864.1| NAC domain-containing protein 69 [Glycine soja] 2.8e-187	GO:0003677, DNA binding;GO:0005516, calmodulin binding;GO:0005634, nucleus;GO:0005789, endoplasmic reticulum membrane;GO:0005886, plasma membrane;GO:0006351, transcription, DNA-templated;GO:0006355, regulation of transcription, DNA-templated;GO:0016021, integral component of membrane;GO:0045892, negative regulation of transcription, DNA-templated;GO:0071470, cellular response to osmotic stress;GO…	-	2.41309e-05	-0.783602	-0.763869	-0.332369	0.292341	-0.643821	-0.0258907	-0.456923	-0.00571936	0.115906	-0.794304	0.176567	0.266149	-0.400203	-0.0897411	-0.568653	0.405638	0.301602	-0.31033	-0.540271	-0.33198	-0.415033	0.246624	-0.0113295	-0.223238	0.327608	-0.741275	-0.512129	-0.0555487	-0.162971	0.521717	0.0418528	4
T_45203_c0_g2	C2H2	gi|920688742|gb|KOM32725.1| hypothetical protein LR48_Vigan01g228100 [Vigna angularis] 0.0e+00	GO:0003676, nucleic acid binding;GO:0005634, nucleus;GO:0006351, transcription, DNA-templated;GO:0006355, regulation of transcription, DNA-templated;GO:0009741, response to brassinosteroid;GO:0009826, unidimensional cell growth;GO:0010228, vegetative to reproductive phase transition of meristem;GO:0033169, histone H3-K9 demethylation;GO:0035067, negative regulation of histone acetylation;GO:00468…	-	-0.354122	-0.769563	-0.745282	-0.313282	0.150363	-0.611647	-0.0200167	-0.432276	-0.132904	0.246687	-0.776401	0.278365	0.419284	-0.667533	-0.128416	-0.435137	0.450612	0.116145	-0.427943	-0.66355	-0.443317	-0.701128	-0.028866	-0.604756	-0.553345	0.428152	-0.650139	-0.169782	-0.063732	-0.519346	0.35739	-0.0954962	4
T_42075_c1_g9	MYB->MYB	gi|920682255|gb|KOM29027.1| hypothetical protein LR48_Vigan627s007600 [Vigna angularis] 2.4e-176	GO:0003677, DNA binding;GO:0003700, DNA binding transcription factor activity;GO:0005634, nucleus;GO:0006351, transcription, DNA-templated;GO:0008285, negative regulation of cell proliferation;GO:0030154, cell differentiation;GO:0035987, endodermal cell differentiation;GO:0045597, positive regulation of cell differentiation;GO:0045892, negative regulation of transcription, DNA-templated;GO:004589…	-	-0.215482	-0.875976	-0.859732	-0.371752	-0.0842802	-0.612847	-0.00672868	-0.56123	-0.267552	0.488822	-0.829195	0.376786	0.2066	-0.650539	-0.167728	-0.485127	0.428583	0.268599	-0.458326	-0.720905	-0.337683	-0.682941	0.00574151	-0.572685	-0.605422	0.632538	-0.695879	-0.304363	-0.0739456	-0.400103	0.183479	-0.122829	4
T_41643_c4_g3	CPP	gi|947129977|gb|KRH77831.1| hypothetical protein GLYMA_01G236300 [Glycine max] 2.6e-99	GO:0005634, nucleus;GO:0007275, multicellular organism development;GO:0046872, metal ion binding	-	-0.274964	-0.518008	-0.675523	-0.0638847	-0.495704	-0.36525	0.284819	-0.0787606	-0.191816	0.570263	-0.618098	0.316048	0.226555	-0.759686	-0.341954	-0.506332	0.218526	-0.123536	-0.678883	-0.747108	-0.0468516	-0.669668	-0.020614	-0.757251	-0.710913	0.117448	-0.41944	-0.121492	-0.111411	-0.208203	-0.189821	-0.0868571	4
T_43375_c1_g2	C2H2	gi|593787758|ref|XP_007156918.1| hypothetical protein PHAVU_002G028100g [Phaseolus vulgaris] 9.1e-96	GO:0003676, nucleic acid binding;GO:0003700, DNA binding transcription factor activity;GO:0005634, nucleus;GO:0006351, transcription, DNA-templated;GO:0006355, regulation of transcription, DNA-templated;GO:0009937, regulation of gibberellic acid mediated signaling pathway;GO:0010029, regulation of seed germination;GO:0010431, seed maturation;GO:0044212, transcription regulatory region DNA binding…	-	-0.117003	0.758921	0.818216	0.280688	0.0320303	0.523154	0.230402	0.600939	0.452111	-0.703478	0.805805	-0.354863	-0.160979	0.527616	0.447628	0.525107	-0.583839	-0.356385	0.383328	0.592224	0.463103	0.603994	0.0267424	0.535301	0.668219	-0.472685	0.484979	0.20987	0.0513189	0.122931	-0.0687761	-0.132797	4
T_42108_c2_g1	AP2/ERF->AP2/ERF-ERF	gi|955334391|ref|XP_014634196.1| PREDICTED: NF-X1-type zinc finger protein NFXL1-like [Glycine max] 0.0e+00	GO:0000122, negative regulation of transcription by RNA polymerase II;GO:0000977, RNA polymerase II regulatory region sequence-specific DNA binding;GO:0001078, transcriptional repressor activity, RNA polymerase II proximal promoter sequence-specific DNA binding;GO:0005634, nucleus;GO:0006366, transcription by RNA polymerase II;GO:0008270, zinc ion binding;GO:0009642, response to light intensity;G…	-	0.303554	0.69752	0.787837	0.363611	0.374054	0.611633	-0.312142	0.16069	-0.221989	-0.164724	0.697811	-0.272312	-0.0850945	0.688851	-0.00767859	0.701234	-0.069492	0.20542	0.617042	0.883049	0.0363607	0.466045	-0.236931	0.377776	0.381006	-0.23437	0.771005	0.451694	0.18673	0.13034	0.0258965	0.387543	4
T_40188_c0_g1	OFP	gi|571469287|ref|XP_006584673.1| PREDICTED: DDT domain-containing protein DDB_G0282237-like [Glycine max] 0.0e+00	GO:0006261, DNA-dependent DNA replication;GO:0006338, chromatin remodeling;GO:0006351, transcription, DNA-templated;GO:0006355, regulation of transcription, DNA-templated;GO:0008270, zinc ion binding;GO:0008623, CHRAC;GO:0016590, ACF complex	-	-0.304296	-0.768532	-0.789246	-0.412217	-0.102673	-0.627621	0.0999797	-0.364021	-0.240254	0.349872	-0.72993	0.439962	0.224344	-0.56421	0.0295441	-0.444432	0.167734	0.0174005	-0.553034	-0.635099	-0.243085	-0.70988	-0.0946891	-0.425117	-0.641544	0.549989	-0.686457	-0.302605	0.0933837	-0.362392	0.247037	-0.245434	4
T_42704_c4_g4	GRAS	gi|593782539|ref|XP_007154310.1| hypothetical protein PHAVU_003G107900g [Phaseolus vulgaris] 1.6e-30	GO:0003677, DNA binding;GO:0003700, DNA binding transcription factor activity;GO:0005634, nucleus;GO:0005737, cytoplasm;GO:0005886, plasma membrane;GO:0006351, transcription, DNA-templated;GO:0008219, cell death;GO:0009723, response to ethylene;GO:0009735, response to cytokinin;GO:0009753, response to jasmonic acid;GO:0009873, ethylene-activated signaling pathway;GO:0010286, heat acclimation;GO:0…	-	0.123068	0.485688	0.675169	-0.0939176	0.125238	0.432511	-0.081891	0.225474	0.242119	-0.715038	0.744079	-0.264059	-0.429236	0.698249	0.40165	0.573367	-0.372427	-0.101287	0.535218	0.723495	0.431644	0.531172	0.0567023	0.676304	0.730473	-0.241745	0.357164	-0.00742841	0.056809	0.0918981	0.110466	-0.258491	4
T_37611_c0_g1	AP2/ERF->AP2/ERF-ERF	gi|356533519|ref|XP_003535311.1| PREDICTED: agamous-like MADS-box protein AGL80 [Glycine max] 4.2e-67	GO:0003677, DNA binding;GO:0003700, DNA binding transcription factor activity;GO:0005634, nucleus;GO:0006351, transcription, DNA-templated;GO:0006355, regulation of transcription, DNA-templated;GO:0043078, polar nucleus	-	-0.250504	-0.598946	-0.770748	-0.106844	-0.12315	-0.471233	0.0861866	-0.173344	-0.225371	0.415811	-0.793535	0.505941	0.358354	-0.63657	-0.352024	-0.596572	0.350091	-0.0234783	-0.604611	-0.71062	-0.218738	-0.641553	-0.029451	-0.534874	-0.720278	0.0662876	-0.567279	-0.192283	0.0257238	-0.205965	0.214947	0.0893994	4
T_41871_c1_g1	bHLH	gi|356539820|ref|XP_003538391.1| PREDICTED: protein ODORANT1 [Glycine max] 9.2e-78	GO:0003677, DNA binding;GO:0005634, nucleus;GO:0006351, transcription, DNA-templated;GO:0006355, regulation of transcription, DNA-templated	-	-0.293262	-0.666489	-0.655538	-0.248234	-0.204019	-0.73373	0.609254	0.0701435	0.574107	-0.114625	-0.552943	0.0128257	0.226144	-0.78151	0.269856	-0.671603	-0.177418	-0.315607	-0.643046	-0.804246	-0.178827	-0.384389	0.430827	-0.176821	-0.0681068	0.364601	-0.705088	-0.537872	-0.291014	-0.228065	0.13528	-0.462395	4
T_40156_c1_g3	bHLH	gi|950958256|ref|XP_014497220.1| PREDICTED: LOB domain-containing protein 41 [Vigna radiata var. radiata] 1.1e-102	GO:0006355, regulation of transcription, DNA-templated	-	0.246322	0.520867	0.620773	0.055959	0.141901	0.508268	-0.147839	0.242419	0.132105	-0.50574	0.659868	-0.348762	-0.365541	0.732486	0.131983	0.466608	-0.200873	0.0736312	0.540261	0.759087	0.441362	0.56539	0.210804	0.793012	0.738491	-0.393505	0.416544	-0.116295	-0.027187	0.246248	0.0153274	0.0595894	4
T_38682_c0_g1	C2H2	gi|356520597|ref|XP_003528948.1| PREDICTED: LOB domain-containing protein 41-like [Glycine max] 6.4e-108	GO:0006355, regulation of transcription, DNA-templated	-	0.164459	0.508388	0.623121	0.0567004	0.242602	0.533385	-0.260996	0.167994	0.0973408	-0.527592	0.663815	-0.303579	-0.369463	0.772732	0.132301	0.512432	-0.247701	0.12764	0.642903	0.787693	0.35557	0.559719	0.221712	0.831207	0.75449	-0.335617	0.426885	-0.127468	0.0294929	0.159969	0.00136226	0.0939664	4
T_36389_c0_g1	WRKY	gi|734311681|gb|KHN00098.1| Transcription factor MYB39 [Glycine soja] 2.6e-144	GO:0003677, DNA binding;GO:0003700, DNA binding transcription factor activity;GO:0005634, nucleus	-	-0.116038	-0.678557	-0.738681	-0.378677	-0.15369	-0.697533	0.335193	-0.159133	0.240841	0.204536	-0.710234	0.521349	0.000137948	-0.59547	0.270156	-0.657416	-0.00350813	-0.33872	-0.58731	-0.81962	-0.191671	-0.365499	0.123063	-0.24028	-0.366158	0.438313	-0.788259	-0.349784	0.20467	-0.0883066	0.380768	-0.490296	4
T_36883_c0_g1	MYB->MYB	gi|918463735|gb|ALA09212.1| MYB/HD-like transcription factor, partial [Glycine max] 6.5e-104	GO:0003677, DNA binding;GO:0003700, DNA binding transcription factor activity;GO:0005634, nucleus;GO:0006351, transcription, DNA-templated;GO:0009414, response to water deprivation;GO:0009651, response to salt stress;GO:0009723, response to ethylene;GO:0009733, response to auxin;GO:0009737, response to abscisic acid;GO:0009738, abscisic acid-activated signaling pathway;GO:0009739, response to gib…	-	0.0959585	-0.553875	-0.649943	-0.251516	-0.211778	-0.75054	0.505686	0.0251143	0.356034	0.0377499	-0.593522	0.376009	0.107306	-0.50642	0.307129	-0.715111	-0.0533744	-0.2821	-0.674488	-0.717739	-0.183575	-0.243392	-0.0168976	-0.0873448	-0.375833	0.322423	-0.727872	-0.329771	-0.0595233	0.207147	0.34865	-0.366399	4
T_40486_c2_g1	B3->B3-ARF	gi|734327122|gb|KHN05679.1| Auxin response factor 18 [Glycine soja] 0.0e+00	GO:0003677, DNA binding;GO:0005634, nucleus;GO:0006351, transcription, DNA-templated;GO:0006355, regulation of transcription, DNA-templated;GO:0009734, auxin-activated signaling pathway	-	-0.212844	-0.528707	-0.710393	-0.00421755	-0.0286517	-0.508912	0.135674	-0.108269	-0.118024	0.533638	-0.777138	0.392115	0.432996	-0.691107	-0.338177	-0.54451	0.429968	-0.0996239	-0.581964	-0.725801	-0.248229	-0.730124	-0.0549872	-0.630638	-0.68549	0.189234	-0.601249	-0.0523408	0.206618	-0.166213	0.211445	0.096925	4
T_46132_c1_g5	NF-Y->NF-YB	gi|763739377|gb|KJB06876.1| hypothetical protein B456_001G064700 [Gossypium raimondii] 9.3e-27	GO:0003700, DNA binding transcription factor activity;GO:0005634, nucleus;GO:0006351, transcription, DNA-templated;GO:0006355, regulation of transcription, DNA-templated	-	-0.20092	-0.834126	-0.763675	-0.632023	-0.0959875	-0.773126	0.190534	-0.238051	0.192856	-0.0316064	-0.673897	0.26047	0.0792282	-0.540634	0.179732	-0.601625	0.169862	-0.100449	-0.498936	-0.637722	-0.193455	-0.465151	0.238476	-0.0782666	-0.223224	0.549643	-0.856375	-0.64045	-0.166344	-0.266169	0.428481	-0.455428	4
T_40474_c0_g2	NAC	gi|187940289|gb|ACD39375.1| NAC domain protein [Glycine max] 1.7e-74	GO:0003677, DNA binding;GO:0003700, DNA binding transcription factor activity;GO:0005634, nucleus;GO:0006351, transcription, DNA-templated;GO:0006355, regulation of transcription, DNA-templated;GO:0010089, xylem development;GO:0043067, regulation of programmed cell death;GO:0048367, shoot system development	-	-0.286834	-0.636288	-0.732609	-0.308971	-0.284087	-0.65308	0.285305	-0.239434	-0.0470739	0.397486	-0.729532	0.452428	0.132468	-0.682009	0.106398	-0.568595	0.0245252	-0.230818	-0.733697	-0.807604	-0.202589	-0.5955	-0.0739699	-0.496716	-0.618436	0.513238	-0.661143	-0.233854	0.124114	-0.115341	0.0965737	-0.360049	4
T_39095_c0_g2	MYB->MYB	gi|356518318|ref|XP_003527826.1| PREDICTED: myb-related protein 3R-1-like [Glycine max] 0.0e+00	GO:0003677, DNA binding;GO:0005634, nucleus	K09420-ko04151 PI3K-Akt signaling pathway	-0.0721079	-0.689783	-0.832466	-0.151866	-0.250883	-0.574959	0.219734	-0.190138	-0.16931	0.552304	-0.787142	0.426636	0.322552	-0.688434	-0.258073	-0.619822	0.408348	0.0305562	-0.639451	-0.767839	-0.199192	-0.653557	-0.0717637	-0.623609	-0.748881	0.292345	-0.639538	-0.15641	-0.0584608	-0.150592	0.132766	-0.0201282	4
T_39444_c2_g4	SBP	gi|734359189|gb|KHN15202.1| Squamosa promoter-binding-like protein 6 [Glycine soja] 2.9e-271	GO:0003677, DNA binding;GO:0003700, DNA binding transcription factor activity;GO:0005634, nucleus;GO:0006351, transcription, DNA-templated;GO:0006355, regulation of transcription, DNA-templated;GO:0010468, regulation of gene expression;GO:0042742, defense response to bacterium;GO:0046872, metal ion binding	-	-0.171195	-0.739294	-0.784316	-0.245558	-0.227234	-0.597136	0.328747	-0.0127558	0.0761061	0.36094	-0.676511	0.133852	0.331457	-0.830903	-0.230103	-0.612864	0.243958	-0.17461	-0.6133	-0.739749	-0.15533	-0.678984	0.358281	-0.521021	-0.390822	0.261914	-0.582711	-0.367802	-0.126441	-0.382286	0.110458	-0.185542	4
T_43101_c1_g2	GARP->GARP-ARR-B	gi|734326405|gb|KHN05484.1| Putative NAC domain-containing protein 94 [Glycine soja] 4.0e-116	GO:0003677, DNA binding;GO:0003700, DNA binding transcription factor activity;GO:0005634, nucleus;GO:0006351, transcription, DNA-templated;GO:0006355, regulation of transcription, DNA-templated	-	-0.275928	-0.750021	-0.744222	-0.441753	-0.332941	-0.687942	0.373694	-0.151016	0.333203	0.00730871	-0.614663	0.0991907	0.0466481	-0.631065	0.165228	-0.675437	-0.072764	-0.100825	-0.589887	-0.75757	-0.0475886	-0.345738	0.475664	-0.084251	-0.0840055	0.502027	-0.743044	-0.689322	-0.367505	-0.145132	-0.0376839	-0.435004	4
T_46043_c0_g3	WRKY	gi|351721340|ref|NP_001236950.1| bZIP transcription factor bZIP35 [Glycine max] 6.1e-98	GO:0003700, DNA binding transcription factor activity;GO:0004707, MAP kinase activity;GO:0005622, intracellular;GO:0005634, nucleus;GO:0006351, transcription, DNA-templated;GO:0043565, sequence-specific DNA binding	-	-0.158671	-0.436054	-0.525405	-0.212313	-0.546485	-0.650771	0.741376	0.321375	0.50289	-0.0686938	-0.354512	-0.0105335	0.144247	-0.733949	0.238803	-0.653126	-0.329306	-0.577236	-0.865874	-0.70932	0.021949	-0.395277	0.245966	-0.258912	-0.213519	0.151432	-0.488137	-0.386907	-0.349844	0.0716623	-0.154991	-0.551864	4
T_44297_c1_g1	GRAS	gi|955364145|ref|XP_014622540.1| PREDICTED: homeobox protein knotted-1-like 3 isoform X2 [Glycine max] 3.2e-179	GO:0003677, DNA binding;GO:0005634, nucleus;GO:0006355, regulation of transcription, DNA-templated	-	-0.3122	0.115255	0.0472453	0.0261641	-0.311089	-0.294407	0.769882	0.823344	0.81072	-0.431326	0.170823	-0.253747	0.195059	-0.293349	0.569541	-0.30794	-0.643362	-0.736471	-0.439579	-0.198489	0.1552	0.161735	0.43427	0.313162	0.349767	0.0638579	-0.126336	-0.294327	-0.313615	0.041129	-0.156898	-0.427036	4
T_40224_c0_g1	FAR1	gi|571471857|ref|XP_003532941.2| PREDICTED: protein FAR1-RELATED SEQUENCE 6-like [Glycine max] 0.0e+00	GO:0005634, nucleus;GO:0006355, regulation of transcription, DNA-templated;GO:0008270, zinc ion binding	-	-0.420522	-0.767433	-0.741816	-0.504941	-0.221049	-0.602421	0.0313863	-0.250965	-0.188983	0.298444	-0.672232	0.213481	0.276847	-0.730868	-0.19951	-0.475968	0.213701	-0.0781921	-0.543939	-0.643719	-0.251844	-0.742614	0.137597	-0.536901	-0.520745	0.500247	-0.569169	-0.392764	-0.12799	-0.500503	0.0599484	-0.235628	4
T_43782_c1_g3	C2H2	gi|947071353|gb|KRH20244.1| hypothetical protein GLYMA_13G165300 [Glycine max] 5.7e-123	GO:0004722, protein serine/threonine phosphatase activity;GO:0046872, metal ion binding	-	-0.088381	-0.74762	-0.797664	-0.109321	0.0978311	-0.384849	-0.106702	-0.413827	-0.353179	0.529764	-0.769974	0.446957	0.334209	-0.543871	-0.459654	-0.405527	0.546624	0.325539	-0.249452	-0.590379	-0.275094	-0.687505	0.022848	-0.573097	-0.630411	0.221237	-0.565928	-0.141745	0.137047	-0.456311	0.310858	0.199821	3
T_41172_c1_g3	HB->HB-HD-ZIP	gi|356540888|ref|XP_003538916.1| PREDICTED: protein FAR1-RELATED SEQUENCE 5-like [Glycine max] 0.0e+00	GO:0005634, nucleus;GO:0006355, regulation of transcription, DNA-templated;GO:0008270, zinc ion binding	-	0.0241918	-0.780255	-0.768402	-0.169849	0.343451	-0.556493	-0.225809	-0.556831	-0.270532	0.30326	-0.807457	0.321631	0.430242	-0.555974	-0.46012	-0.458146	0.684965	0.392589	-0.250994	-0.561984	-0.602476	-0.691468	-0.126929	-0.5682	-0.633265	0.213808	-0.58164	-0.109698	-0.033362	-0.355675	0.503221	0.236793	3
T_41350_c7_g3	LOB	gi|571477469|ref|XP_006587267.1| PREDICTED: DNA-directed primase/polymerase protein isoform X2 [Glycine max] 2.7e-163	GO:0003682, chromatin binding;GO:0003887, DNA-directed DNA polymerase activity;GO:0003896, DNA primase activity;GO:0005634, nucleus;GO:0005759, mitochondrial matrix;GO:0006264, mitochondrial DNA replication;GO:0009411, response to UV;GO:0019985, translesion synthesis	-	0.17873	0.820025	0.744306	0.457417	-0.0610689	0.681339	-0.158256	0.319218	-0.221614	0.0422716	0.641382	0.00812061	-0.142899	0.529531	-0.0427607	0.555733	-0.15868	-0.0761063	0.384947	0.581945	0.222809	0.508467	-0.421926	0.0109397	0.0629327	-0.379561	0.767222	0.697179	0.22471	0.284121	-0.28124	0.282351	3
T_41571_c0_g2	B3->B3	gi|356512592|ref|XP_003525002.1| PREDICTED: uncharacterized zinc finger protein At4g06634-like [Glycine max] 2.5e-103	GO:0003676, nucleic acid binding;GO:0043565, sequence-specific DNA binding;GO:0046872, metal ion binding	-	-0.0643809	-0.736098	-0.785474	-0.203052	0.175307	-0.628832	-0.0779413	-0.428845	-0.30731	0.580388	-0.837498	0.355645	0.441018	-0.630977	-0.264064	-0.492808	0.57553	0.195248	-0.462039	-0.616644	-0.551482	-0.692032	-0.0814163	-0.601119	-0.679616	0.533295	-0.555663	-0.0772864	0.0594169	-0.315354	0.336986	0.108544	3
T_39723_c1_g1	EIL	gi|356526880|ref|XP_003532044.1| PREDICTED: transcription factor bHLH79 [Glycine max] 4.1e-122	GO:0003677, DNA binding;GO:0003700, DNA binding transcription factor activity;GO:0005634, nucleus;GO:0006351, transcription, DNA-templated;GO:0006355, regulation of transcription, DNA-templated;GO:0048446, petal morphogenesis	-	0.0695549	-0.657619	-0.777513	0.0390616	-0.114028	-0.473054	0.149147	-0.356586	-0.235878	0.625189	-0.790016	0.440817	0.25258	-0.646884	-0.386403	-0.523106	0.51774	0.244006	-0.554293	-0.708413	-0.241432	-0.639197	-0.0474265	-0.650298	-0.659917	0.298378	-0.542781	-0.0872529	0.00878121	-0.0938658	0.175107	0.1283	3
T_40703_c3_g1	MYB->MYB	gi|593696552|ref|XP_007148758.1| hypothetical protein PHAVU_005G011700g [Phaseolus vulgaris] 0.0e+00	GO:0003700, DNA binding transcription factor activity;GO:0005634, nucleus;GO:0006351, transcription, DNA-templated;GO:0006355, regulation of transcription, DNA-templated;GO:0007623, circadian rhythm;GO:0008270, zinc ion binding;GO:0009585, red, far-red light phototransduction;GO:0010017, red or far-red light signaling pathway;GO:0010218, response to far red light;GO:0042753, positive regulation o…	-	-0.218348	-0.703575	-0.751467	-0.203169	0.326913	-0.672742	-0.0580821	-0.346923	-0.146157	0.32844	-0.872758	0.332644	0.581909	-0.61021	-0.17688	-0.526362	0.569752	0.144734	-0.454017	-0.632188	-0.524927	-0.62029	-0.0197417	-0.486312	-0.565587	0.454481	-0.654345	-0.109441	0.0437317	-0.351991	0.509484	0.13554	3
T_44457_c1_g2	bZIP	gi|734397366|gb|KHN30121.1| Protein FAR1-RELATED SEQUENCE 4 [Glycine soja] 0.0e+00	GO:0005634, nucleus;GO:0006355, regulation of transcription, DNA-templated;GO:0008270, zinc ion binding	-	-0.0587332	-0.612474	-0.611233	-0.165787	0.368748	-0.738085	0.0151823	-0.306743	-0.0275504	0.187709	-0.756146	0.221777	0.599115	-0.587745	-0.0585317	-0.507276	0.505293	0.128336	-0.437554	-0.568972	-0.708471	-0.491445	-0.214222	-0.458272	-0.563903	0.476834	-0.565314	-0.00447577	-0.0686433	-0.214581	0.583826	0.120092	3
T_101869_c0_g1	MYB->MYB-related	gi|356504666|ref|XP_003521116.1| PREDICTED: transcription factor RADIALIS-like [Glycine max] 5.4e-34	GO:0003677, DNA binding;GO:0005634, nucleus;GO:0006351, transcription, DNA-templated;GO:0006355, regulation of transcription, DNA-templated;GO:0009908, flower development;GO:0048262, determination of dorsal/ventral asymmetry	-	-0.0122688	-0.770175	-0.844941	-0.156883	-0.15036	-0.453556	0.00844668	-0.333498	-0.268578	0.569586	-0.751469	0.3344	0.251631	-0.659999	-0.494199	-0.554518	0.421412	0.223242	-0.404582	-0.683196	-0.250647	-0.65765	0.161319	-0.572121	-0.597029	0.231712	-0.520997	-0.26782	-0.0630513	-0.306299	0.0463614	0.110447	3
T_42845_c1_g4	LOB	gi|571465435|ref|XP_006583366.1| PREDICTED: MADS-box protein SOC1-like isoform X2 [Glycine max] 4.4e-48	GO:0000060, protein import into nucleus, translocation;GO:0003677, DNA binding;GO:0003700, DNA binding transcription factor activity;GO:0005634, nucleus;GO:0005737, cytoplasm;GO:0006351, transcription, DNA-templated;GO:0008134, transcription factor binding;GO:0009409, response to cold;GO:0009739, response to gibberellin;GO:0009908, flower development;GO:0009911, positive regulation of flower deve…	-	-0.000927525	-0.821391	-0.744232	-0.465295	0.135265	-0.57177	-0.0870968	-0.575059	-0.187374	0.289593	-0.774595	0.46651	0.0983606	-0.421234	0.000559616	-0.45081	0.444217	0.248373	-0.238035	-0.593339	-0.36088	-0.368745	-0.0281972	-0.309498	-0.451355	0.484631	-0.696905	-0.276171	0.0894595	-0.345263	0.602718	-0.151897	3
T_43907_c4_g1	AP2/ERF->AP2/ERF-ERF	gi|908212338|tpg|DAA64912.1| TPA_inf: dof protein [Cajanus cajan] 5.3e-19	GO:0003677, DNA binding;GO:0003700, DNA binding transcription factor activity;GO:0005634, nucleus;GO:0006351, transcription, DNA-templated;GO:0006355, regulation of transcription, DNA-templated;GO:0009409, response to cold;GO:0009416, response to light stimulus;GO:0009845, seed germination;GO:0046872, metal ion binding	-	-0.0548798	-0.628598	-0.668833	-0.148807	0.319396	-0.731734	0.0801822	-0.286811	0.0464996	0.046199	-0.743232	0.408243	0.497955	-0.464776	0.0235935	-0.512025	0.437738	0.144243	-0.438815	-0.582613	-0.515786	-0.514078	-0.287084	-0.342632	-0.582245	0.401105	-0.740726	-0.0633285	-0.00903779	-0.119085	0.629782	0.0462915	3
T_39153_c0_g1	GARP->GARP-ARR-B	gi|356557052|ref|XP_003546832.1| PREDICTED: NAC domain-containing protein 86-like [Glycine max] 1.1e-198	GO:0003677, DNA binding;GO:0003700, DNA binding transcription factor activity;GO:0005634, nucleus;GO:0006351, transcription, DNA-templated;GO:0006355, regulation of transcription, DNA-templated;GO:0044212, transcription regulatory region DNA binding;GO:0090602, sieve element enucleation;GO:0090603, sieve element differentiation	-	-0.165358	-0.793119	-0.757864	-0.258383	-0.120259	-0.410267	0.0724448	-0.356718	-0.169639	0.181013	-0.635998	0.236753	0.198313	-0.510504	-0.365856	-0.375644	0.464508	0.359869	-0.325535	-0.52469	0.00604257	-0.700999	0.127767	-0.394184	-0.412132	0.180131	-0.678594	-0.444423	-0.216193	-0.422811	0.251692	-0.00828544	3
T_39387_c2_g1	LIM	gi|356527342|ref|XP_003532270.1| PREDICTED: ethylene-responsive transcription factor-like protein At4g13040 isoform X4 [Glycine max] 5.7e-94	GO:0003677, DNA binding;GO:0003700, DNA binding transcription factor activity;GO:0005634, nucleus;GO:0006351, transcription, DNA-templated;GO:0007275, multicellular organism development;GO:0009873, ethylene-activated signaling pathway	-	-0.0581454	-0.84336	-0.832758	-0.267662	-0.142325	-0.634553	0.340805	-0.273932	-0.0377852	0.301336	-0.721918	0.146324	0.273772	-0.667551	-0.0675218	-0.572872	0.221601	0.1634	-0.568667	-0.672444	-0.195044	-0.596531	0.199063	-0.329375	-0.424856	0.349478	-0.654573	-0.466459	-0.222225	-0.310839	0.246142	-0.138916	3
T_38668_c1_g1	C2H2	gi|593696175|ref|XP_007148586.1| hypothetical protein PHAVU_006G220900g [Phaseolus vulgaris] 5.9e-199	GO:0005634, nucleus;GO:0006355, regulation of transcription, DNA-templated;GO:0008270, zinc ion binding	-	-0.113441	-0.700572	-0.707136	-0.266004	0.387261	-0.556293	-0.293863	-0.534426	-0.234362	0.26492	-0.7573	0.512505	0.293747	-0.344293	-0.193118	-0.39935	0.575635	0.325569	-0.153826	-0.469592	-0.586971	-0.563293	-0.204324	-0.294932	-0.584936	0.445699	-0.69472	-0.192431	0.124836	-0.309395	0.57517	0.13144	3
T_43596_c2_g2	WRKY	gi|356534289|ref|XP_003535689.1| PREDICTED: pentatricopeptide repeat-containing protein At5g43790 [Glycine max] 0.0e+00	GO:0008270, zinc ion binding	-	-0.24784	-0.471576	-0.660012	-0.00367245	-0.496837	-0.489346	0.529057	0.120178	0.0639633	0.428133	-0.573038	0.174389	0.264472	-0.76655	-0.135649	-0.594582	-0.0417999	-0.272457	-0.842326	-0.750514	0.0498646	-0.614801	0.203602	-0.501133	-0.47837	0.199224	-0.454028	-0.264634	-0.126173	-0.0309169	-0.261683	-0.170661	3
T_44847_c0_g1	C2H2	gi|1012355537|gb|KYP66724.1| Homeobox-leucine zipper protein ATHB-40, partial [Cajanus cajan] 1.5e-75	GO:0003700, DNA binding transcription factor activity;GO:0005634, nucleus;GO:0006351, transcription, DNA-templated;GO:0006355, regulation of transcription, DNA-templated;GO:0009733, response to auxin;GO:0043565, sequence-specific DNA binding	-	-0.411864	-0.804187	-0.793105	-0.264554	-0.277574	-0.429335	0.126698	-0.43215	-0.233622	0.370262	-0.665763	0.327649	0.0904145	-0.671496	-0.234036	-0.374565	0.178487	0.192409	-0.490843	-0.666721	-0.0837549	-0.794897	0.154123	-0.538312	-0.492462	0.423455	-0.604441	-0.446518	-0.116443	-0.502944	-0.0374034	-0.19804	3
T_39504_c2_g1	WRKY	gi|356512034|ref|XP_003524726.1| PREDICTED: NAC domain-containing protein 100-like [Glycine max] 7.2e-113	GO:0003677, DNA binding;GO:0003700, DNA binding transcription factor activity;GO:0005634, nucleus;GO:0006351, transcription, DNA-templated;GO:0006355, regulation of transcription, DNA-templated	-	-0.024444	-0.463641	-0.532253	0.0321399	-0.0671355	-0.740927	0.652159	0.294984	0.495264	-0.146411	-0.5037	-0.00743565	0.588118	-0.743856	0.113594	-0.711177	-0.0607991	-0.265494	-0.694842	-0.681675	-0.407254	-0.30818	0.0571061	-0.252801	-0.34754	0.0839455	-0.494938	-0.204264	-0.389358	-0.0177046	0.306697	-0.0677505	3
T_43517_c3_g2	bHLH	gi|356498846|ref|XP_003518259.1| PREDICTED: uncharacterized protein LOC100816918 [Glycine max] 1.2e-143	GO:0003677, DNA binding;GO:0003700, DNA binding transcription factor activity;GO:0005634, nucleus;GO:0006351, transcription, DNA-templated;GO:0006355, regulation of transcription, DNA-templated;GO:0009793, embryo development ending in seed dormancy;GO:0009965, leaf morphogenesis;GO:0030154, cell differentiation;GO:0045962, positive regulation of development, heterochronic;GO:0048366, leaf develop…	-	-0.0226349	0.842932	0.864688	0.130093	-0.197867	0.587681	0.0200255	0.509584	0.186964	-0.430302	0.85941	-0.439861	-0.285544	0.585293	0.29715	0.534187	-0.49865	-0.355304	0.367174	0.662036	0.439934	0.633701	-0.096575	0.421429	0.513519	-0.418094	0.671157	0.282011	-0.0519382	0.301251	-0.425062	-0.119187	3
T_42684_c2_g1	bZIP	gi|955320187|ref|XP_014631045.1| PREDICTED: mediator-associated protein 1-like [Glycine max] 5.0e-91	GO:0005730, nucleolus;GO:0005829, cytosol;GO:0006355, regulation of transcription, DNA-templated;GO:0009507, chloroplast;GO:0016592, mediator complex	-	0.150496	0.774463	0.647627	0.719435	0.197156	0.60532	0.0287959	0.441982	-0.105388	0.116063	0.490655	-0.0323231	0.162778	0.393337	-0.0641913	0.493547	-0.0113323	-0.0489201	0.305233	0.506647	0.156219	0.349371	-0.325789	-0.0156706	0.061222	-0.441389	0.644701	0.730259	0.336377	0.173242	-0.0286102	0.469875	3
T_44577_c0_g8	B3->B3-ARF	gi|571478541|ref|XP_003534274.2| PREDICTED: transcription factor MYC2-like [Glycine max] 7.2e-206	GO:0003677, DNA binding;GO:0003700, DNA binding transcription factor activity;GO:0005634, nucleus;GO:0006351, transcription, DNA-templated;GO:0009269, response to desiccation;GO:0009611, response to wounding;GO:0009737, response to abscisic acid;GO:0009738, abscisic acid-activated signaling pathway;GO:0009753, response to jasmonic acid;GO:0009963, positive regulation of flavonoid biosynthetic pro…	K13422-ko04016 MAPK signaling pathway - plant;ko04075 Plant hormone signal transduction	0.0259364	0.237653	0.283785	-0.0910268	0.0872523	-0.066134	0.291163	0.511568	0.73206	-0.593217	0.328987	-0.435272	-0.113481	0.207729	0.483698	-0.0917762	-0.509018	-0.416683	0.105281	0.192137	0.187069	0.516632	0.608209	0.823651	0.812655	-0.0675011	0.00624614	-0.41402	-0.116946	0.236144	0.0229719	-0.256121	3
T_43078_c4_g5	GARP->GARP-ARR-B	gi|947109798|gb|KRH58124.1| hypothetical protein GLYMA_05G106000 [Glycine max] 2.9e-112	GO:0000784, nuclear chromosome, telomeric region;GO:0000785, chromatin;GO:0000786, nucleosome;GO:0003691, double-stranded telomeric DNA binding;GO:0003700, DNA binding transcription factor activity;GO:0005634, nucleus;GO:0005730, nucleolus;GO:0006334, nucleosome assembly;GO:0006351, transcription, DNA-templated;GO:0009651, response to salt stress;GO:0009723, response to ethylene;GO:0009733, respo…	-	-0.0594824	-0.78695	-0.831756	-0.178725	0.321093	-0.639786	-0.0813857	-0.500025	-0.165531	0.404404	-0.894855	0.246571	0.457014	-0.584432	-0.270708	-0.56629	0.567008	0.293491	-0.365258	-0.662872	-0.533244	-0.639744	0.0312907	-0.426441	-0.552618	0.31998	-0.684711	-0.221198	0.0350526	-0.277422	0.428682	0.171877	3
T_43078_c4_g1	GARP->GARP-ARR-B	gi|734411919|gb|KHN36305.1| Histone H1.2 [Glycine soja] 6.1e-88	GO:0000784, nuclear chromosome, telomeric region;GO:0000785, chromatin;GO:0000786, nucleosome;GO:0003677, DNA binding;GO:0003691, double-stranded telomeric DNA binding;GO:0003700, DNA binding transcription factor activity;GO:0005634, nucleus;GO:0005730, nucleolus;GO:0006334, nucleosome assembly;GO:0006351, transcription, DNA-templated;GO:0006357, regulation of transcription by RNA polymerase II;G…	-	-0.0766267	-0.765131	-0.739776	-0.235246	0.267742	-0.538067	-0.0724933	-0.498388	-0.294477	0.385787	-0.818256	0.253163	0.457082	-0.497736	-0.220187	-0.425645	0.626771	0.405023	-0.278731	-0.538013	-0.438615	-0.545484	-0.0828127	-0.427648	-0.575317	0.339714	-0.617741	-0.178328	-0.026755	-0.414776	0.559731	0.18613	3
T_43506_c0_g6	bHLH	gi|955369616|ref|XP_014623064.1| PREDICTED: uncharacterized protein LOC100796448 [Glycine max] 0.0e+00	GO:0005634, nucleus;GO:0006355, regulation of transcription, DNA-templated;GO:0008270, zinc ion binding	-	-0.233473	-0.747969	-0.72953	-0.376147	0.272583	-0.623542	-0.177884	-0.502233	-0.179842	0.308533	-0.830993	0.269011	0.359102	-0.561279	-0.177264	-0.488081	0.572631	0.17273	-0.357305	-0.589781	-0.529964	-0.577629	0.0466396	-0.41262	-0.466346	0.45787	-0.642647	-0.266108	-0.0194066	-0.38382	0.465572	0.00656817	3
T_40961_c0_g2	AP2/ERF->AP2/ERF-AP2	gi|571487903|ref|XP_006590775.1| PREDICTED: uncharacterized protein LOC100800973 isoform X1 [Glycine max] 0.0e+00	GO:0005634, nucleus;GO:0006351, transcription, DNA-templated;GO:0006355, regulation of transcription, DNA-templated;GO:0008270, zinc ion binding;GO:0009707, chloroplast outer membrane;GO:0016021, integral component of membrane	-	-0.318543	-0.755022	-0.724194	-0.354256	0.184253	-0.697122	-0.000751248	-0.39423	-0.123976	0.213557	-0.803534	0.251321	0.49114	-0.657908	-0.0788149	-0.47359	0.418794	0.0980457	-0.456677	-0.6613	-0.487279	-0.662904	-0.106479	-0.532398	-0.586379	0.490421	-0.683794	-0.17482	-0.0168487	-0.439031	0.455246	-0.0557401	3
T_39807_c0_g1	HB->HB-other	gi|955346252|ref|XP_014618712.1| PREDICTED: cell division cycle 5-like protein isoform X1 [Glycine max] 0.0e+00	GO:0003677, DNA binding;GO:0003700, DNA binding transcription factor activity;GO:0005681, spliceosomal complex;GO:0006281, DNA repair;GO:0006351, transcription, DNA-templated;GO:0006355, regulation of transcription, DNA-templated;GO:0006397, mRNA processing;GO:0007049, cell cycle;GO:0008380, RNA splicing;GO:0009507, chloroplast;GO:0009870, defense response signaling pathway, resistance gene-depen…	K12860-ko03040 Spliceosome	-0.375513	-0.776179	-0.732391	-0.395512	0.0421998	-0.476552	-0.0915359	-0.502512	-0.189228	0.344432	-0.728187	0.267684	0.21565	-0.609938	-0.146201	-0.385021	0.427831	0.127386	-0.321166	-0.635096	-0.319425	-0.61729	0.13406	-0.555853	-0.436242	0.41024	-0.596137	-0.265944	-0.0490983	-0.581168	0.226979	-0.18	3
T_42634_c2_g1	NF-Y->NF-YC	gi|965614512|dbj|BAU00145.1| hypothetical protein VIGAN_10171200 [Vigna angularis var. angularis] 1.1e-283	GO:0003677, DNA binding;GO:0003700, DNA binding transcription factor activity;GO:0005634, nucleus;GO:0006351, transcription, DNA-templated;GO:0006355, regulation of transcription, DNA-templated;GO:0009965, leaf morphogenesis	-	-0.222611	0.089401	0.220586	-0.0832684	0.0917668	-0.101899	0.377049	0.443569	0.76969	-0.734949	0.297623	-0.375938	-0.00477528	-0.00637807	0.511132	-0.0248024	-0.505232	-0.396669	0.0674953	0.0684195	0.0966482	0.322738	0.523911	0.51644	0.708077	-0.0322468	-0.0538865	-0.342935	-0.241276	-0.13762	0.107893	-0.377171	3
T_39877_c1_g1	C2H2	gi|955364413|ref|XP_014622591.1| PREDICTED: MADS-box transcription factor 23-like isoform X4 [Glycine max] 1.2e-90	GO:0003677, DNA binding;GO:0003700, DNA binding transcription factor activity;GO:0005634, nucleus;GO:0006351, transcription, DNA-templated	-	-0.29767	-0.706971	-0.703391	-0.315299	0.0251342	-0.626314	0.0567531	-0.416847	-0.239705	0.330812	-0.789451	0.185252	0.498772	-0.644704	-0.0721542	-0.454835	0.391597	0.175305	-0.544869	-0.660525	-0.353408	-0.577462	-0.0963345	-0.602953	-0.608028	0.501338	-0.558392	-0.0981429	-0.137159	-0.366609	0.240307	-0.0230024	3
T_45904_c1_g4	C2C2->C2C2-Dof	gi|1009142380|ref|XP_015888693.1| PREDICTED: probable WRKY transcription factor 53 [Ziziphus jujuba] 5.1e-08	GO:0003700, DNA binding transcription factor activity;GO:0005634, nucleus;GO:0006351, transcription, DNA-templated;GO:0009751, response to salicylic acid;GO:0031347, regulation of defense response;GO:0043565, sequence-specific DNA binding;GO:1900056, negative regulation of leaf senescence	-	-0.471517	-0.725782	-0.706316	-0.504029	0.0378311	-0.635863	-0.145336	-0.414038	-0.196524	0.272308	-0.752188	0.235178	0.385054	-0.588899	-0.0983769	-0.447854	0.370599	0.0753522	-0.374318	-0.634644	-0.415045	-0.633804	-0.0790416	-0.488427	-0.587309	0.580758	-0.682488	-0.260578	-0.051725	-0.454959	0.208115	-0.108072	3
T_42176_c0_g5	AP2/ERF->AP2/ERF-ERF	gi|356522674|ref|XP_003529971.1| PREDICTED: transcription factor TCP9-like [Glycine max] 5.4e-94	GO:0003677, DNA binding;GO:0003700, DNA binding transcription factor activity;GO:0005634, nucleus;GO:0006351, transcription, DNA-templated;GO:0006355, regulation of transcription, DNA-templated;GO:0008361, regulation of cell size;GO:0048364, root development;GO:1900056, negative regulation of leaf senescence	-	0.0185606	0.404358	0.445205	-0.00269002	0.035141	0.00728147	0.278872	0.553545	0.67117	-0.732535	0.498683	-0.498781	-0.0715338	0.322892	0.463584	0.05049	-0.54504	-0.351363	0.104314	0.348167	0.214803	0.492592	0.324111	0.788221	0.717413	-0.137681	0.126784	-0.271536	-0.246928	0.357955	-0.0953589	-0.186825	3
T_41550_c1_g7	GRAS	gi|356570829|ref|XP_003553586.1| PREDICTED: trihelix transcription factor PTL-like [Glycine max] 5.4e-264	GO:0003677, DNA binding;GO:0003700, DNA binding transcription factor activity;GO:0005634, nucleus;GO:0006351, transcription, DNA-templated;GO:0006355, regulation of transcription, DNA-templated;GO:0009909, regulation of flower development;GO:0010200, response to chitin;GO:0042803, protein homodimerization activity;GO:0046621, negative regulation of organ growth;GO:0048441, petal development;GO:00…	-	0.0993631	-0.617257	-0.686528	-0.135956	0.167729	-0.734785	0.140153	-0.318814	0.139407	0.371714	-0.808327	0.134937	0.345327	-0.629287	-0.0287824	-0.696825	0.270151	0.03463	-0.49983	-0.760992	-0.522373	-0.305685	0.169644	-0.300677	-0.326943	0.48681	-0.582702	-0.182304	0.0331817	0.0788188	0.249407	0.0217115	3
T_39795_c2_g4	HB->HB-HD-ZIP	gi|593690198|ref|XP_007145700.1| hypothetical protein PHAVU_007G260900g [Phaseolus vulgaris] 3.7e-79	GO:0003700, DNA binding transcription factor activity;GO:0005634, nucleus;GO:0006351, transcription, DNA-templated;GO:0008283, cell proliferation;GO:0009585, red, far-red light phototransduction;GO:0009641, shade avoidance;GO:0009733, response to auxin;GO:0009735, response to cytokinin;GO:0009826, unidimensional cell growth;GO:0010016, shoot system morphogenesis;GO:0010017, red or far-red light s…	-	-0.108144	0.728411	0.752559	0.310073	0.0680842	0.420028	0.17779	0.690768	0.423203	-0.63316	0.723389	-0.414491	0.0365925	0.362751	0.229353	0.414041	-0.458353	-0.407344	0.254333	0.553101	0.316737	0.46022	0.113264	0.404461	0.604313	-0.443761	0.538073	0.228598	-0.0411559	0.116323	-0.124738	0.00584361	3
T_45177_c3_g1	SRS	gi|965599926|dbj|BAT87104.1| hypothetical protein VIGAN_05044500 [Vigna angularis var. angularis] 2.5e-68	GO:0003677, DNA binding;GO:0003700, DNA binding transcription factor activity;GO:0005634, nucleus;GO:0006351, transcription, DNA-templated;GO:0006952, defense response;GO:0009873, ethylene-activated signaling pathway	-	-0.0971875	0.138618	0.16499	-0.0784553	-0.067434	-0.125801	0.424142	0.541507	0.768424	-0.611517	0.281484	-0.411907	-0.0757515	0.0945858	0.487189	-0.174698	-0.582498	-0.38891	-0.0140837	0.0762546	0.220703	0.414227	0.617193	0.772306	0.721237	-0.0431548	-0.0913517	-0.526304	-0.289662	0.177506	-0.0956938	-0.292811	3
T_44743_c0_g1	B3->B3-ARF	gi|1012332102|gb|KYP43547.1| Transcription factor bHLH121 family [Cajanus cajan] 5.0e-92	GO:0003677, DNA binding;GO:0003700, DNA binding transcription factor activity;GO:0005634, nucleus;GO:0006351, transcription, DNA-templated	-	-0.172398	-0.752584	-0.735521	-0.244687	0.200838	-0.63042	0.0909786	-0.362474	-0.0672532	0.259355	-0.773244	0.121603	0.462455	-0.617172	-0.130392	-0.463697	0.504778	0.1823	-0.436658	-0.606443	-0.353392	-0.659791	0.0587936	-0.450321	-0.44229	0.36024	-0.674142	-0.236269	-0.0665348	-0.384582	0.437867	-0.00683623	3
T_43943_c3_g2	AP2/ERF->AP2/ERF-ERF	gi|356502547|ref|XP_003520080.1| PREDICTED: uncharacterized protein LOC100787178 isoform X1 [Glycine max] 1.1e-158	GO:0003677, DNA binding;GO:0005634, nucleus;GO:0006351, transcription, DNA-templated;GO:0006355, regulation of transcription, DNA-templated	-	-0.134104	-0.662106	-0.715014	-0.0900541	0.161843	-0.682682	0.0952992	-0.29675	-0.154993	0.404053	-0.833977	0.14051	0.643426	-0.745789	-0.279622	-0.551378	0.484521	0.160157	-0.565316	-0.691057	-0.533128	-0.681217	-0.113219	-0.628911	-0.666456	0.384682	-0.553054	-0.0539027	-0.0572948	-0.241069	0.326205	0.201361	3
T_41624_c1_g4	C3H	gi|571552918|ref|XP_006603730.1| PREDICTED: uncharacterized protein LOC100803981 isoform X1 [Glycine max] 5.0e-139	GO:0003677, DNA binding;GO:0003723, RNA binding;GO:0046872, metal ion binding	-	-0.0260374	0.617022	0.674528	0.0255725	0.166761	0.195718	0.0563237	0.527024	0.527014	-0.720736	0.639976	-0.398658	-0.112688	0.501975	0.470827	0.287151	-0.439105	-0.377837	0.282139	0.554934	0.172993	0.595641	0.133666	0.719715	0.712633	-0.13804	0.322764	-0.0014811	-0.0911466	0.305655	-0.0193523	-0.146145	3
T_41624_c1_g2	C3H	gi|947123661|gb|KRH71867.1| hypothetical protein GLYMA_02G173900 [Glycine max] 8.8e-137	GO:0003677, DNA binding;GO:0003723, RNA binding;GO:0046872, metal ion binding	-	-0.0934449	0.614573	0.623788	0.194872	-0.430816	0.734522	0.122232	0.468008	0.0181889	-0.269729	0.778417	-0.198586	-0.370074	0.528483	0.113429	0.543756	-0.471938	-0.124661	0.406688	0.561342	0.733776	0.458762	0.0172221	0.323479	0.383021	-0.519303	0.534028	0.116918	-0.0662738	0.0172949	-0.473396	-0.0780797	3
T_42498_c2_g2	AP2/ERF->AP2/ERF-ERF	gi|571436122|ref|XP_006573674.1| PREDICTED: AP2-like ethylene-responsive transcription factor ANT isoform X2 [Glycine max] 6.0e-97	GO:0003677, DNA binding;GO:0003700, DNA binding transcription factor activity;GO:0005634, nucleus;GO:0006351, transcription, DNA-templated;GO:0007275, multicellular organism development;GO:0009908, flower development;GO:0010492, maintenance of shoot apical meristem identity;GO:0030154, cell differentiation;GO:0042127, regulation of cell proliferation	-	-0.160302	-0.669351	-0.733702	-0.261422	0.192102	-0.625152	-0.194236	-0.37408	-0.311665	0.458917	-0.799243	0.431568	0.495108	-0.616161	-0.297627	-0.491192	0.560878	0.0754266	-0.417979	-0.612036	-0.641083	-0.694577	-0.251562	-0.674865	-0.805304	0.424564	-0.539001	0.0278556	0.0713608	-0.340708	0.356604	0.106265	3
T_44795_c0_g1	C2H2	gi|734436632|gb|KHN48238.1| Zinc finger protein ZAT5 [Glycine soja] 1.3e-107	GO:0003676, nucleic acid binding;GO:0003700, DNA binding transcription factor activity;GO:0005634, nucleus;GO:0006351, transcription, DNA-templated;GO:0006355, regulation of transcription, DNA-templated;GO:0043565, sequence-specific DNA binding;GO:0044212, transcription regulatory region DNA binding;GO:0046872, metal ion binding	-	0.00724021	-0.690594	-0.723521	-0.124755	0.04328	-0.58294	0.281421	-0.375221	0.173513	0.18208	-0.739211	0.221784	0.0949912	-0.500069	0.0206043	-0.57963	0.233433	0.179474	-0.470503	-0.690873	-0.146595	-0.383378	0.255309	-0.118494	-0.184303	0.301036	-0.742654	-0.457879	-0.0339226	-0.00347628	0.338398	-0.118463	3
T_46535_c1_g1	DDT	gi|356546621|ref|XP_003541723.1| PREDICTED: uncharacterized protein LOC100777465 isoform X1 [Glycine max] 0.0e+00	GO:0003677, DNA binding;GO:0003700, DNA binding transcription factor activity;GO:0005634, nucleus;GO:0006351, transcription, DNA-templated;GO:0006355, regulation of transcription, DNA-templated;GO:0009908, flower development	-	-0.47974	-0.810354	-0.736035	-0.531731	-0.0271918	-0.571534	-0.0467664	-0.442669	-0.0633497	0.0770771	-0.685776	0.314866	0.193628	-0.60597	-0.0390017	-0.394073	0.273572	0.0155867	-0.357405	-0.672775	-0.225909	-0.666891	0.0653215	-0.514994	-0.431103	0.441273	-0.73397	-0.328575	-0.0522526	-0.579546	0.25153	-0.345561	3
T_45203_c0_g3	C2H2	gi|593329076|ref|XP_007137965.1| hypothetical protein PHAVU_009G169700g [Phaseolus vulgaris] 0.0e+00	GO:0003676, nucleic acid binding;GO:0005634, nucleus;GO:0006351, transcription, DNA-templated;GO:0006355, regulation of transcription, DNA-templated;GO:0009741, response to brassinosteroid;GO:0009826, unidimensional cell growth;GO:0010228, vegetative to reproductive phase transition of meristem;GO:0033169, histone H3-K9 demethylation;GO:0035067, negative regulation of histone acetylation;GO:00468…	-	-0.198238	-0.620162	-0.703711	-0.0456867	0.28786	-0.622255	-0.00994422	-0.304928	-0.19029	0.391652	-0.834313	0.497627	0.603614	-0.598573	-0.162022	-0.48244	0.517783	0.164849	-0.444243	-0.643174	-0.584876	-0.592729	-0.248312	-0.588861	-0.736499	0.472278	-0.601269	0.0684224	0.107806	-0.318098	0.506384	0.206945	3
T_42863_c5_g5	BES1	gi|734413473|gb|KHN36918.1| BES1/BZR1 like protein 4 [Glycine soja] 5.2e-154	GO:0003677, DNA binding;GO:0003700, DNA binding transcription factor activity;GO:0006351, transcription, DNA-templated;GO:0006355, regulation of transcription, DNA-templated;GO:0009742, brassinosteroid mediated signaling pathway	-	0.0868892	0.833539	0.729187	0.378458	0.124377	0.454235	-0.0256229	0.700612	0.279277	-0.327073	0.638679	-0.277858	0.0487485	0.483158	0.0728612	0.292814	-0.270763	-0.372622	0.335328	0.572402	0.164878	0.600012	0.0166054	0.467622	0.438177	-0.479606	0.58415	0.327745	0.0748238	0.362112	-0.154858	0.262289	3
T_42433_c1_g1	GARP->GARP-G2-like	gi|734329749|gb|KHN06404.1| Putative Myb family transcription factor [Glycine soja] 4.7e-177	GO:0003677, DNA binding;GO:0003700, DNA binding transcription factor activity;GO:0005634, nucleus;GO:0006351, transcription, DNA-templated;GO:0006355, regulation of transcription, DNA-templated	-	-0.0919501	-0.775295	-0.797801	-0.299538	0.0156116	-0.586134	6.87911e-05	-0.516678	-0.267416	0.616802	-0.859741	0.157983	0.312041	-0.613532	-0.182552	-0.538616	0.453023	0.273426	-0.436755	-0.693164	-0.345281	-0.520658	0.129445	-0.459521	-0.5046	0.53199	-0.590626	-0.267211	-0.0126586	-0.257952	0.164292	0.0413916	3
T_43375_c1_g8	C2H2	gi|590703865|ref|XP_007046994.1| C2H2-like zinc finger protein [Theobroma cacao] 3.6e-66	GO:0003676, nucleic acid binding;GO:0003677, DNA binding;GO:0003700, DNA binding transcription factor activity;GO:0006351, transcription, DNA-templated;GO:0006355, regulation of transcription, DNA-templated;GO:0046872, metal ion binding	-	0.186189	0.851084	0.80258	0.533671	0.347807	0.62515	-0.152879	0.377669	-0.0634347	-0.225496	0.597829	-0.140319	0.0999747	0.61824	0.0430675	0.538649	-0.128432	-0.0269186	0.498014	0.668251	0.114082	0.608671	-0.350856	0.280609	0.23399	-0.56625	0.702442	0.655138	0.299407	0.253952	0.108832	0.462788	3
T_43036_c0_g1	C3H	gi|1012354200|gb|KYP65387.1| Zinc finger CCCH domain-containing protein 40 [Cajanus cajan] 3.0e-91	GO:0000166, nucleotide binding;GO:0000387, spliceosomal snRNP assembly;GO:0000974, Prp19 complex;GO:0003677, DNA binding;GO:0003723, RNA binding;GO:0017070, U6 snRNA binding;GO:0036002, pre-mRNA binding;GO:0046872, metal ion binding;GO:0071006, U2-type catalytic step 1 spliceosome;GO:0071007, U2-type catalytic step 2 spliceosome	K12872-ko03040 Spliceosome	-0.0373688	0.758685	0.801895	0.122888	0.0275228	0.422687	0.0559754	0.563528	0.441206	-0.659802	0.776088	-0.265486	-0.278953	0.575556	0.431234	0.442405	-0.540369	-0.437175	0.365787	0.607646	0.358403	0.649948	0.0577914	0.624291	0.694239	-0.269452	0.463643	0.145011	0.0806846	0.290495	-0.111829	-0.184672	3
T_41871_c2_g5	bHLH	gi|924371551|gb|ALB75308.1| R2R3-MYB factor [Lablab purpureus] 5.2e-66	GO:0003677, DNA binding;GO:0003700, DNA binding transcription factor activity;GO:0005634, nucleus;GO:0006351, transcription, DNA-templated;GO:0009723, response to ethylene;GO:0009739, response to gibberellin;GO:0009751, response to salicylic acid;GO:0009753, response to jasmonic acid;GO:0010200, response to chitin;GO:0016021, integral component of membrane;GO:0046686, response to cadmium ion	-	-0.0842229	-0.580896	-0.626235	-0.368299	-0.0563225	-0.777054	0.342548	-0.123836	0.26516	0.115731	-0.680852	0.311024	0.185445	-0.615028	0.298563	-0.630648	0.0569413	-0.371678	-0.67094	-0.76168	-0.280053	-0.36674	0.0037568	-0.308489	-0.369625	0.447952	-0.701761	-0.195653	0.12173	0.0122822	0.39787	-0.438025	3
T_41876_c0_g1	bHLH	gi|356541852|ref|XP_003539386.1| PREDICTED: probable serine/threonine-protein kinase At1g09600 isoform X1 [Glycine max] 2.0e-186	GO:0004674, protein serine/threonine kinase activity;GO:0005524, ATP binding	-	0.129103	0.633913	0.731439	0.174854	0.0334304	0.465219	-0.0253406	0.417398	0.076976	-0.518338	0.784484	-0.468767	-0.0321921	0.61892	0.196409	0.512493	-0.332026	0.0730798	0.472126	0.775727	0.192196	0.567242	-0.17206	0.541295	0.420441	-0.312611	0.612284	0.17297	-0.30734	0.153123	-0.175717	0.180997	3
T_38742_c0_g1	WRKY	gi|356511089|ref|XP_003524262.1| PREDICTED: calmodulin-binding transcription activator 1-like isoform X2 [Glycine max] 0.0e+00	GO:0001077, transcriptional activator activity, RNA polymerase II proximal promoter sequence-specific DNA binding;GO:0003677, DNA binding;GO:0003700, DNA binding transcription factor activity;GO:0005634, nucleus;GO:0006355, regulation of transcription, DNA-templated;GO:0009409, response to cold;GO:0043565, sequence-specific DNA binding;GO:0045893, positive regulation of transcription, DNA-templat…	-	-0.0537602	-0.718464	-0.693791	-0.566691	0.0723326	-0.729388	0.0623067	-0.322036	0.245898	0.126972	-0.678196	0.0493373	0.0222306	-0.475076	0.15376	-0.62349	0.19202	-0.143555	-0.417679	-0.615011	-0.255084	-0.340929	0.451146	0.0135704	-0.010821	0.51164	-0.736978	-0.583667	-0.0113265	-0.058851	0.261651	-0.394314	3
T_36991_c0_g2	MYB->MYB	gi|920710761|gb|KOM52010.1| hypothetical protein LR48_Vigan09g066900 [Vigna angularis] 4.9e-88	GO:0003700, DNA binding transcription factor activity;GO:0005634, nucleus;GO:0006351, transcription, DNA-templated;GO:0043565, sequence-specific DNA binding	-	-0.0141923	0.134608	0.323826	-0.384444	0.198948	0.0836612	-0.0511549	0.159753	0.427359	-0.755447	0.414089	-0.316938	-0.286147	0.457198	0.495288	0.202655	-0.369981	-0.204573	0.397035	0.397272	0.26325	0.4527	0.352108	0.755855	0.73727	-0.136316	0.00423437	-0.333653	-0.0362168	-0.0393471	0.215386	-0.388542	3
T_45901_c2_g8	C2C2->C2C2-Dof	gi|734337611|gb|KHN08548.1| Dof zinc finger protein DOF1.4 [Glycine soja] 1.2e-119	GO:0003677, DNA binding;GO:0003700, DNA binding transcription factor activity;GO:0005634, nucleus;GO:0006351, transcription, DNA-templated;GO:0006355, regulation of transcription, DNA-templated;GO:0010200, response to chitin;GO:0044212, transcription regulatory region DNA binding;GO:0046872, metal ion binding	-	-0.181318	-0.695372	-0.77015	-0.352288	-0.212546	-0.686556	0.315913	-0.0783121	0.298424	0.0195946	-0.660072	0.461316	-0.0111057	-0.641707	0.0256388	-0.656375	0.0376082	-0.357271	-0.677809	-0.771515	-0.0401671	-0.613283	0.274734	-0.241165	-0.270888	0.289034	-0.821358	-0.510477	0.0679662	-0.0686891	0.257968	-0.480908	3
T_39595_c1_g1	MYB->MYB-related	gi|734438106|gb|KHN48920.1| NAC domain-containing protein 21/22 [Glycine soja] 2.8e-136	GO:0003677, DNA binding;GO:0003700, DNA binding transcription factor activity;GO:0005634, nucleus;GO:0006351, transcription, DNA-templated;GO:0006355, regulation of transcription, DNA-templated;GO:0010014, meristem initiation;GO:0010199, organ boundary specification between lateral organs and the meristem	-	0.180239	-0.622944	-0.765346	-0.0333558	-0.316138	-0.630436	0.385724	-0.143053	0.0454677	0.354951	-0.671818	0.264955	0.222122	-0.683631	-0.229738	-0.696984	0.256214	0.0262963	-0.7472	-0.749822	-0.221197	-0.555196	-0.027511	-0.500828	-0.596516	0.174955	-0.554293	-0.216712	-0.285245	0.167039	0.0120418	-0.0589699	3
T_43810_c0_g2	B3->B3-ARF	gi|920679329|gb|KOM26241.1| hypothetical protein LR48_Vigan238s007400 [Vigna angularis] 3.4e-145	GO:0003677, DNA binding;GO:0003700, DNA binding transcription factor activity;GO:0005634, nucleus;GO:0006351, transcription, DNA-templated;GO:0009751, response to salicylic acid;GO:0009834, plant-type secondary cell wall biogenesis;GO:0045893, positive regulation of transcription, DNA-templated;GO:0050832, defense response to fungus;GO:1901348, positive regulation of secondary cell wall biogenesi…	-	-0.102685	-0.629057	-0.713233	-0.103792	-0.275418	-0.519567	0.341691	-0.179358	-0.0483782	0.675273	-0.6902	0.205273	0.232571	-0.738743	-0.0588963	-0.562195	0.193933	-0.0175667	-0.568012	-0.766395	-0.253635	-0.44956	0.16765	-0.540521	-0.492397	0.496569	-0.47994	-0.192418	-0.052825	-0.218299	-0.0403793	-0.116462	3
T_39504_c2_g2	WRKY	gi|734366783|gb|KHN18216.1| Protein CUP-SHAPED COTYLEDON 2 [Glycine soja] 1.3e-130	GO:0003677, DNA binding;GO:0003700, DNA binding transcription factor activity;GO:0005634, nucleus;GO:0006351, transcription, DNA-templated;GO:0006355, regulation of transcription, DNA-templated;GO:0010072, primary shoot apical meristem specification;GO:0010160, formation of animal organ boundary;GO:0010223, secondary shoot formation;GO:0048366, leaf development;GO:0048504, regulation of timing of…	-	-0.107569	-0.591976	-0.582916	-0.404516	0.413004	-0.707531	-0.0503204	-0.279759	0.188592	-0.134795	-0.665905	0.352091	0.21909	-0.307626	0.19978	-0.533499	0.18747	-0.0871593	-0.295041	-0.482414	-0.486863	-0.296878	0.046186	0.102196	-0.213857	0.361466	-0.737483	-0.382514	0.168071	-0.0914873	0.71038	-0.163322	3
T_43644_c2_g1	MADS->MADS-M-type	gi|356496735|ref|XP_003517221.1| PREDICTED: MADS-box transcription factor 23-like [Glycine max] 1.9e-109	GO:0003677, DNA binding;GO:0003700, DNA binding transcription factor activity;GO:0005634, nucleus;GO:0006351, transcription, DNA-templated	-	-0.0669199	-0.633607	-0.739806	-0.24469	0.0507548	-0.561856	-0.0154402	-0.357162	-0.0372358	0.138756	-0.74076	0.581561	0.0310426	-0.391525	-0.193841	-0.532538	0.357912	0.0245126	-0.484487	-0.601531	-0.137348	-0.638407	-0.0344793	-0.205913	-0.459893	0.193433	-0.806966	-0.380455	0.201554	0.0490062	0.433089	-0.116342	3
T_39032_c2_g2	WRKY	gi|965659994|dbj|BAT76413.1| hypothetical protein VIGAN_01440800 [Vigna angularis var. angularis] 6.7e-194	GO:0003677, DNA binding;GO:0003700, DNA binding transcription factor activity;GO:0005634, nucleus;GO:0006351, transcription, DNA-templated;GO:0006355, regulation of transcription, DNA-templated;GO:0009266, response to temperature stimulus;GO:0009740, gibberellic acid mediated signaling pathway;GO:0010452, histone H3-K36 methylation;GO:0048579, negative regulation of long-day photoperiodism, flowe…	-	-0.0170233	-0.289887	-0.372794	-0.0406449	0.0264387	-0.203776	-0.37242	-0.342464	-0.544169	0.357245	-0.411103	0.353014	0.291361	-0.312145	-0.631931	-0.111229	0.633509	0.220397	-0.303119	-0.210031	-0.276588	-0.702836	-0.429876	-0.751641	-0.718478	0.103827	-0.136526	0.269695	-0.0125209	-0.0901502	0.0180875	0.261935	3
T_43122_c2_g7	GARP->GARP-ARR-B	gi|356543869|ref|XP_003540381.1| PREDICTED: NAC domain-containing protein 73-like [Glycine max] 1.8e-155	GO:0003677, DNA binding;GO:0003700, DNA binding transcription factor activity;GO:0005634, nucleus;GO:0006351, transcription, DNA-templated;GO:0006355, regulation of transcription, DNA-templated;GO:0044212, transcription regulatory region DNA binding;GO:0045893, positive regulation of transcription, DNA-templated;GO:2000652, regulation of secondary cell wall biogenesis	-	-0.118945	-0.76751	-0.81742	-0.203622	-0.403877	-0.475959	0.345502	-0.304867	-0.131818	0.438885	-0.686323	0.263645	0.0825944	-0.690967	-0.180707	-0.538985	0.194779	0.114429	-0.639288	-0.735656	-0.0139213	-0.628512	0.169476	-0.501726	-0.503333	0.241426	-0.579746	-0.411267	-0.216971	-0.240695	-0.0126089	-0.205978	3
T_39877_c1_g6	C2H2	gi|955333444|ref|XP_014634038.1| PREDICTED: MADS-box transcription factor 23-like [Glycine max] 1.2e-103	GO:0003677, DNA binding;GO:0003700, DNA binding transcription factor activity;GO:0005634, nucleus;GO:0006351, transcription, DNA-templated	-	-0.21711	-0.710697	-0.71067	-0.552696	-0.403766	-0.515503	0.00742013	-0.48789	-0.322456	0.415928	-0.645853	0.234008	0.0370263	-0.548867	-0.144018	-0.413031	0.350468	0.0744473	-0.518112	-0.644435	-0.0911911	-0.666378	-0.229872	-0.623548	-0.703872	0.382409	-0.621431	-0.253976	-0.150399	-0.204925	-0.0293286	-0.321331	3
T_39998_c2_g3	NAC	gi|351725369|ref|NP_001236578.1| ethylene responsive protein [Glycine max] 6.4e-69	GO:0001666, response to hypoxia;GO:0003677, DNA binding;GO:0003700, DNA binding transcription factor activity;GO:0005634, nucleus;GO:0005886, plasma membrane;GO:0006351, transcription, DNA-templated;GO:0009873, ethylene-activated signaling pathway;GO:0070483, detection of hypoxia	-	0.310485	0.839428	0.833406	0.542924	0.341566	0.450157	-0.0557116	0.484221	0.207989	-0.370693	0.684105	-0.482861	0.206024	0.500427	0.0358721	0.449432	-0.105795	-0.0331089	0.430337	0.672514	-0.0304829	0.609971	-0.204874	0.289477	0.418433	-0.415584	0.73299	0.599832	-0.0666014	0.373967	-0.0837024	0.440478	3
T_38005_c0_g1	bHLH	gi|734420805|gb|KHN41001.1| Putative B3 domain-containing protein [Glycine soja] 4.6e-162	GO:0003677, DNA binding;GO:0005634, nucleus;GO:0006351, transcription, DNA-templated;GO:0006355, regulation of transcription, DNA-templated	-	-0.262973	-0.705575	-0.738868	-0.358173	-0.22906	-0.501567	0.0857794	-0.351193	-0.337443	0.52379	-0.703807	0.434718	0.247426	-0.527861	-0.0208413	-0.40237	0.305631	0.145689	-0.476756	-0.621444	-0.153477	-0.535306	-0.114625	-0.540375	-0.674563	0.592745	-0.581084	-0.156163	-0.025832	-0.379176	0.123586	-0.139164	3
T_42779_c2_g4	FAR1	gi|356556507|ref|XP_003546566.1| PREDICTED: protein FAR1-RELATED SEQUENCE 6-like [Glycine max] 0.0e+00	GO:0005634, nucleus;GO:0006355, regulation of transcription, DNA-templated;GO:0008270, zinc ion binding	-	-0.154222	-0.620458	-0.694914	-0.288369	0.305381	-0.730348	0.0627837	-0.2543	0.0427298	0.304258	-0.832559	0.382792	0.426009	-0.512932	0.153312	-0.583394	0.371451	-0.104087	-0.464022	-0.667007	-0.479564	-0.412058	-0.0229009	-0.278542	-0.468764	0.503178	-0.73166	-0.126003	0.240241	-0.174673	0.587135	-0.0876249	3
T_40872_c0_g2	bHLH	gi|734356525|gb|KHN14177.1| Transcription factor PIF3 [Glycine soja] 1.5e-176	GO:0003677, DNA binding;GO:0003700, DNA binding transcription factor activity;GO:0005634, nucleus;GO:0006351, transcription, DNA-templated;GO:0006355, regulation of transcription, DNA-templated;GO:0009585, red, far-red light phototransduction;GO:0009639, response to red or far red light;GO:0009704, de-etiolation;GO:0009740, gibberellic acid mediated signaling pathway;GO:0010017, red or far-red li…	K12126-ko04075 Plant hormone signal transduction	-0.22749	-0.686976	-0.779924	-0.282402	-0.0979332	-0.608103	0.0395517	-0.289698	-0.294066	0.518982	-0.783253	0.528802	0.320365	-0.653076	-0.153864	-0.525065	0.354959	-0.0340457	-0.611074	-0.676542	-0.404068	-0.686375	-0.154954	-0.60904	-0.779119	0.486419	-0.571145	-0.128253	0.0525507	-0.296708	0.238485	-0.0866818	3
T_45137_c2_g6	C2H2	gi|947073441|gb|KRH22332.1| hypothetical protein GLYMA_13G293800 [Glycine max] 3.9e-251	GO:0003700, DNA binding transcription factor activity;GO:0005634, nucleus;GO:0006351, transcription, DNA-templated;GO:0006355, regulation of transcription, DNA-templated;GO:0044212, transcription regulatory region DNA binding;GO:0046872, metal ion binding	-	-0.0878463	-0.384619	-0.546405	0.247481	0.164573	-0.461453	0.154097	-0.0490578	-0.0743216	0.446716	-0.661982	0.309796	0.633859	-0.701491	-0.347636	-0.462547	0.408132	-0.0443938	-0.495571	-0.642705	-0.514132	-0.614243	-0.225743	-0.754131	-0.72235	0.09027	-0.357168	0.259417	0.133971	-0.176451	0.264085	0.281681	3
T_43783_c2_g2	TCP	gi|593785063|ref|XP_007155572.1| hypothetical protein PHAVU_003G213300g [Phaseolus vulgaris] 4.4e-115	GO:0003677, DNA binding;GO:0003700, DNA binding transcription factor activity;GO:0005634, nucleus;GO:0006351, transcription, DNA-templated;GO:0006355, regulation of transcription, DNA-templated;GO:0008361, regulation of cell size;GO:0048364, root development;GO:1900056, negative regulation of leaf senescence	-	-0.0212787	0.164303	0.219632	-0.168707	-0.0765046	-0.00404486	0.255103	0.403576	0.679041	-0.582391	0.317265	-0.279212	-0.364225	0.19769	0.403778	-0.0617167	-0.465146	-0.417029	0.0423181	0.162816	0.373366	0.408402	0.705574	0.767387	0.861699	-0.0511296	-0.0508337	-0.539032	-0.125212	0.220035	-0.0470549	-0.418259	3
T_43252_c2_g1	C3H	gi|571521343|ref|XP_006598143.1| PREDICTED: zinc finger CCCH domain-containing protein 5-like isoform X2 [Glycine max] 9.8e-70	GO:0000166, nucleotide binding;GO:0000398, mRNA splicing, via spliceosome;GO:0003677, DNA binding;GO:0003723, RNA binding;GO:0046872, metal ion binding;GO:0089701, U2AF	-	-0.193768	-0.457695	-0.585476	-0.00358548	-0.0251629	-0.342334	-0.118882	-0.332808	-0.391482	0.598796	-0.709715	0.506798	0.309831	-0.592005	-0.456475	-0.367295	0.415622	0.0675434	-0.428882	-0.622598	-0.315023	-0.642601	-0.208695	-0.752117	-0.748517	0.258101	-0.375349	0.117323	0.283947	-0.198627	0.125917	0.185793	3
T_42650_c1_g1	bZIP	gi|920680984|gb|KOM27806.1| hypothetical protein LR48_Vigan464s000300 [Vigna angularis] 2.2e-44	GO:0003677, DNA binding;GO:0003700, DNA binding transcription factor activity;GO:0005634, nucleus;GO:0006351, transcription, DNA-templated;GO:0043565, sequence-specific DNA binding	K14432-ko04075 Plant hormone signal transduction	-0.00632394	-0.611733	-0.708965	-0.292301	-0.312869	-0.557759	0.344861	-0.23964	0.0362554	0.293413	-0.666752	0.441874	-0.0256326	-0.442455	0.153896	-0.578074	0.0678242	-0.0661893	-0.58386	-0.725238	0.0475209	-0.345584	-0.0316815	-0.227193	-0.465821	0.304633	-0.733259	-0.319097	0.0855856	0.093924	0.207171	-0.322987	3
T_43250_c2_g1	AP2/ERF->AP2/ERF-ERF	gi|955326189|ref|XP_014632295.1| PREDICTED: ethylene-responsive transcription factor ERF054-like [Glycine max] 4.4e-164	GO:0003677, DNA binding;GO:0003700, DNA binding transcription factor activity;GO:0005634, nucleus;GO:0005737, cytoplasm;GO:0006351, transcription, DNA-templated;GO:0009651, response to salt stress;GO:0009873, ethylene-activated signaling pathway;GO:2000070, regulation of response to water deprivation	-	-0.0282283	-0.752709	-0.741934	-0.31212	0.0280764	-0.574529	0.25637	-0.244103	0.23275	0.0891573	-0.659777	0.485142	-0.0536814	-0.460669	0.160479	-0.541792	0.0512523	-0.0824923	-0.347878	-0.671795	-0.0978738	-0.36211	0.318604	-0.0466554	-0.14739	0.338102	-0.799209	-0.495171	0.234528	-0.224789	0.520657	-0.36484	3
T_41044_c0_g3	bZIP	gi|356567961|ref|XP_003552183.1| PREDICTED: auxin response factor 9-like isoform X1 [Glycine max] 7.6e-294	GO:0003677, DNA binding;GO:0003700, DNA binding transcription factor activity;GO:0005634, nucleus;GO:0006351, transcription, DNA-templated;GO:0006355, regulation of transcription, DNA-templated;GO:0009734, auxin-activated signaling pathway	K14486-ko04075 Plant hormone signal transduction	-0.311575	-0.441337	-0.547333	0.0288675	-0.127255	-0.688549	0.571817	0.29169	0.377367	0.00818272	-0.549187	-0.00986595	0.672855	-0.842961	0.00142395	-0.633334	0.0545819	-0.322748	-0.766317	-0.720176	-0.316146	-0.524614	0.0795843	-0.486993	-0.422473	0.18375	-0.4997	-0.12928	-0.33745	-0.173533	0.119911	-0.0714419	3
T_43380_c0_g1	C2H2	gi|1012347586|gb|KYP58777.1| hypothetical protein KK1_014199 [Cajanus cajan] 6.0e-254	GO:0005634, nucleus;GO:0005737, cytoplasm;GO:0006351, transcription, DNA-templated;GO:0009408, response to heat;GO:0009414, response to water deprivation;GO:0009585, red, far-red light phototransduction;GO:0009631, cold acclimation;GO:0009816, defense response to bacterium, incompatible interaction;GO:0043565, sequence-specific DNA binding;GO:0045893, positive regulation of transcription, DNA-tem…	-	0.359665	-0.183871	-0.302299	0.117035	0.738619	-0.51345	-0.223652	-0.137138	0.0278837	0.180667	-0.56767	0.220888	0.540443	-0.127399	-0.130974	-0.443177	0.532646	0.122413	-0.110787	-0.224146	-0.749223	-0.0619352	-0.191968	0.0234034	-0.310242	0.176459	-0.315685	0.168037	0.270155	0.27684	0.710762	0.500505	3
T_82548_c0_g1	C3H	gi|955301765|ref|XP_014624837.1| PREDICTED: zinc-finger homeodomain protein 1-like isoform X1 [Glycine max] 5.2e-09	GO:0003677, DNA binding;GO:0005634, nucleus;GO:0006351, transcription, DNA-templated;GO:0006355, regulation of transcription, DNA-templated;GO:0046872, metal ion binding	-	-0.0332128	-0.766671	-0.72532	-0.608456	-0.262887	-0.640784	0.0530751	-0.457686	-0.0431532	0.237576	-0.683944	0.0134132	-0.0141644	-0.649955	-0.160536	-0.610927	0.258192	-0.0747882	-0.518302	-0.722025	-0.246535	-0.551793	0.0765663	-0.419177	-0.435546	0.185836	-0.6318	-0.467631	-0.173998	-0.0880236	0.10828	-0.372638	3
T_39563_c0_g1	MYB->MYB-related	gi|356574521|ref|XP_003555395.1| PREDICTED: probable WRKY transcription factor 27 [Glycine max] 6.8e-45	GO:0003700, DNA binding transcription factor activity;GO:0005634, nucleus;GO:0006351, transcription, DNA-templated;GO:0007263, nitric oxide mediated signal transduction;GO:0009739, response to gibberellin;GO:0042742, defense response to bacterium;GO:0043565, sequence-specific DNA binding;GO:0044212, transcription regulatory region DNA binding;GO:0045892, negative regulation of transcription, DNA-…	-	-0.0593792	-0.0547542	0.070188	-0.262654	-0.0558863	0.0394944	0.169873	0.182686	0.497507	-0.473919	0.2243	-0.266031	-0.409	0.171244	0.302565	-0.00506136	-0.374032	-0.192493	0.151166	0.14221	0.420115	0.26444	0.789823	0.711747	0.829946	-0.02634	-0.129025	-0.664849	-0.0953434	-0.0423648	0.000137246	-0.408436	3
T_45679_c0_g2	NAC	gi|734309942|gb|KHM99702.1| Transcription factor bHLH25 [Glycine soja] 1.9e-80	GO:0003677, DNA binding;GO:0003700, DNA binding transcription factor activity;GO:0005634, nucleus;GO:0006351, transcription, DNA-templated;GO:0006355, regulation of transcription, DNA-templated	-	0.140554	0.731693	0.736772	0.562245	0.460342	0.619401	-0.27961	0.259684	-0.0717104	-0.0508466	0.523995	-0.29924	0.196964	0.495743	-0.117596	0.535955	0.0731918	0.176215	0.64705	0.629862	-0.0609422	0.574932	-0.124495	0.17819	0.337077	-0.350498	0.718103	0.61206	0.17245	0.0388909	0.000145663	0.603462	3
T_41270_c0_g1	SBP	gi|356522186|ref|XP_003529728.1| PREDICTED: protein indeterminate-domain 7 [Glycine max] 2.3e-55	GO:0003676, nucleic acid binding;GO:0003700, DNA binding transcription factor activity;GO:0005634, nucleus;GO:0006351, transcription, DNA-templated;GO:0006355, regulation of transcription, DNA-templated;GO:0044212, transcription regulatory region DNA binding;GO:0046872, metal ion binding	-	0.184349	0.837001	0.752753	0.694027	0.12524	0.440224	0.157769	0.565605	0.199768	-0.110201	0.574599	-0.37168	0.217151	0.282941	0.0397284	0.327852	-0.246482	-0.131646	0.227752	0.453755	-0.0409338	0.579994	-0.180009	0.148141	0.269342	-0.338096	0.735063	0.588544	-0.0233385	0.374749	-0.230918	0.44754	3
T_42381_c1_g1	WRKY	gi|734415212|gb|KHN37624.1| Nuclear transcription factor Y subunit A-9 [Glycine soja] 8.3e-109	GO:0003677, DNA binding;GO:0003700, DNA binding transcription factor activity;GO:0006351, transcription, DNA-templated;GO:0006355, regulation of transcription, DNA-templated;GO:0009793, embryo development ending in seed dormancy;GO:0010262, somatic embryogenesis;GO:0016602, CCAAT-binding factor complex;GO:0048316, seed development;GO:0048510, regulation of timing of transition from vegetative to …	-	-0.0533421	-0.527106	-0.60704	-0.149604	0.135711	-0.811321	0.449521	0.125735	0.446557	-0.0658257	-0.662148	0.159471	0.504989	-0.664942	0.192351	-0.729833	0.0865965	-0.352084	-0.631534	-0.727954	-0.441949	-0.348901	0.0352276	-0.20594	-0.360783	0.169452	-0.685767	-0.203341	-0.0399444	-0.0152848	0.547914	-0.165271	3
T_46966_c5_g1	HB->HB-HD-ZIP	gi|950973082|ref|XP_014500653.1| PREDICTED: homeobox-leucine zipper protein HAT22-like [Vigna radiata var. radiata] 2.4e-33	GO:0003700, DNA binding transcription factor activity;GO:0005634, nucleus;GO:0006351, transcription, DNA-templated;GO:0043565, sequence-specific DNA binding	-	-0.199047	-0.662061	-0.634914	-0.320412	-0.29465	-0.755826	0.423578	-0.0160972	0.257642	-0.102877	-0.533542	0.0127645	0.292416	-0.760923	-0.0397969	-0.581699	0.0704375	-0.148386	-0.760716	-0.650922	-0.178338	-0.637453	0.140564	-0.371288	-0.30729	0.404502	-0.615023	-0.454302	-0.451233	-0.122073	0.0838315	-0.317853	3
T_42209_c1_g1	bHLH	gi|947075144|gb|KRH23984.1| hypothetical protein GLYMA_12G014700 [Glycine max] 3.2e-164	GO:0005524, ATP binding;GO:0005634, nucleus;GO:0006351, transcription, DNA-templated;GO:0006355, regulation of transcription, DNA-templated;GO:0032502, developmental process	-	-0.0694063	-0.764751	-0.799432	-0.154004	-0.0755675	-0.381779	0.0433486	-0.304552	-0.195766	0.343735	-0.649635	0.385573	0.154101	-0.478239	-0.398978	-0.426001	0.349657	0.299172	-0.267125	-0.541562	-0.073642	-0.68296	0.154017	-0.316643	-0.468382	0.163144	-0.650794	-0.42812	0.0187073	-0.360913	0.223489	0.0697779	2
T_41055_c1_g2	LOB	gi|908212404|tpg|DAA64945.1| TPA_inf: dof protein [Cajanus cajan] 2.6e-90	GO:0003677, DNA binding;GO:0003700, DNA binding transcription factor activity;GO:0005634, nucleus;GO:0006351, transcription, DNA-templated;GO:0006355, regulation of transcription, DNA-templated;GO:0009733, response to auxin;GO:0009751, response to salicylic acid;GO:0042545, cell wall modification;GO:0044212, transcription regulatory region DNA binding;GO:0045787, positive regulation of cell cycle…	-	0.049364	0.338307	0.326466	-0.0443408	-0.0884036	-0.130064	0.456108	0.660561	0.718928	-0.704116	0.36609	-0.283615	-0.0652448	0.162324	0.520356	-0.114717	-0.572902	-0.592534	-0.158102	0.15974	0.243233	0.417851	0.253796	0.662398	0.548924	-0.187862	0.0111332	-0.245736	-0.145239	0.418326	0.0748827	-0.329889	2
T_39591_c3_g3	MYB->MYB-related	gi|356549699|ref|XP_003543229.1| PREDICTED: ethylene-responsive transcription factor 4 [Glycine max] 3.7e-35	GO:0003677, DNA binding;GO:0003700, DNA binding transcription factor activity;GO:0005634, nucleus;GO:0006351, transcription, DNA-templated;GO:0009873, ethylene-activated signaling pathway;GO:0009908, flower development;GO:0010102, lateral root morphogenesis;GO:0010432, bract development;GO:0010451, floral meristem growth;GO:0010582, floral meristem determinacy;GO:0044212, transcription regulatory…	-	0.0101406	0.143816	0.164687	-0.0837939	-0.0130774	-0.215381	0.445701	0.580042	0.773671	-0.633926	0.251517	-0.370344	-0.0327645	0.0651196	0.481692	-0.221256	-0.568919	-0.467618	-0.0871988	0.0702947	0.126998	0.369898	0.501368	0.761131	0.636568	-0.0675561	-0.106124	-0.48151	-0.20721	0.265759	0.059498	-0.283951	2
T_41319_c1_g1	HB->HB-HD-ZIP	gi|356522908|ref|XP_003530084.1| PREDICTED: transcription repressor KAN1-like isoform X1 [Glycine max] 6.7e-177	GO:0003700, DNA binding transcription factor activity;GO:0005634, nucleus;GO:0006351, transcription, DNA-templated;GO:0006355, regulation of transcription, DNA-templated;GO:0009887, animal organ morphogenesis;GO:0009943, adaxial/abaxial axis specification;GO:0009944, polarity specification of adaxial/abaxial axis;GO:0009956, radial pattern formation;GO:0010051, xylem and phloem pattern formation;…	-	-0.110044	-0.598308	-0.689249	-0.130523	0.337405	-0.756294	0.0391478	-0.149896	0.100128	0.249172	-0.816237	0.213935	0.571199	-0.663918	-0.168626	-0.68101	0.458948	-0.0584702	-0.510784	-0.650351	-0.691292	-0.526363	0.0594482	-0.323908	-0.471274	0.347361	-0.619257	-0.205899	-0.0235195	-0.135589	0.493501	0.142588	2
T_41680_c0_g2	NAC	gi|571546980|ref|XP_006602590.1| PREDICTED: myb-like protein A [Glycine max] 3.8e-235	GO:0003677, DNA binding;GO:0005634, nucleus	-	0.0253574	-0.653072	-0.667437	-0.0864371	0.420223	-0.730201	0.0147426	-0.318909	-0.042799	0.173665	-0.799356	0.263186	0.648023	-0.568859	-0.156158	-0.528003	0.520175	0.23449	-0.399865	-0.588411	-0.65096	-0.523013	-0.196405	-0.439427	-0.578681	0.398914	-0.612402	-0.00218227	-0.000805064	-0.188398	0.628591	0.237658	2
T_46120_c1_g1	MADS->MADS-MIKC	gi|951054257|ref|XP_014521190.1| PREDICTED: two-component response regulator ORR21-like [Vigna radiata var. radiata] 2.1e-200	GO:0000160, phosphorelay signal transduction system;GO:0003677, DNA binding;GO:0003700, DNA binding transcription factor activity;GO:0005634, nucleus;GO:0006351, transcription, DNA-templated;GO:0009736, cytokinin-activated signaling pathway	K14491-ko04075 Plant hormone signal transduction	0.0645461	0.717436	0.537657	0.424898	-0.10865	0.300019	0.208202	0.794744	0.267356	-0.140997	0.479653	-0.118382	0.122774	0.252824	0.0561751	0.138164	-0.251182	-0.460488	-0.00940239	0.359351	0.253227	0.401396	0.012285	0.252791	0.2453	-0.308894	0.459676	0.327675	0.0389868	0.405823	-0.232235	0.194514	2
T_43973_c1_g2	AP2/ERF->AP2/ERF-ERF	gi|571506108|ref|XP_006595661.1| PREDICTED: WRKY transcription factor 1-like [Glycine max] 2.1e-153	GO:0003700, DNA binding transcription factor activity;GO:0005634, nucleus;GO:0006351, transcription, DNA-templated;GO:0008270, zinc ion binding;GO:0009863, salicylic acid mediated signaling pathway;GO:0043565, sequence-specific DNA binding;GO:0045893, positive regulation of transcription, DNA-templated	-	-0.162343	-0.594368	-0.610323	-0.194479	0.345	-0.742702	0.158885	-0.164521	0.206363	0.0877385	-0.699889	0.106413	0.49912	-0.536034	0.10589	-0.533096	0.26781	-0.0255582	-0.412722	-0.578738	-0.494653	-0.471051	0.0547148	-0.162734	-0.307064	0.458589	-0.704075	-0.25178	0.0656793	-0.179687	0.516269	-0.0225465	2
T_39698_c1_g2	C2C2->C2C2-CO-like	gi|734333702|gb|KHN07702.1| Zinc finger CCCH domain-containing protein 69 [Glycine soja] 2.9e-204	GO:0003677, DNA binding;GO:0005634, nucleus;GO:0008270, zinc ion binding	-	0.289087	-0.229262	-0.27268	0.285246	0.736534	-0.395173	-0.126319	-0.232827	-0.00717042	0.247824	-0.52781	0.139522	0.582809	-0.321139	-0.179106	-0.316249	0.477282	0.195457	-0.0794681	-0.292677	-0.827303	-0.130347	-0.151296	-0.294739	-0.311389	0.126426	-0.133231	0.334227	0.221886	-0.0217793	0.630356	0.483423	2
T_42613_c1_g3	HB->HB-WOX	gi|356572282|ref|XP_003554298.1| PREDICTED: protein PHR1-LIKE 1-like [Glycine max] 1.4e-96	GO:0003677, DNA binding;GO:0003700, DNA binding transcription factor activity;GO:0005634, nucleus;GO:0006351, transcription, DNA-templated;GO:0006355, regulation of transcription, DNA-templated;GO:0007623, circadian rhythm;GO:0016036, cellular response to phosphate starvation;GO:0055063, sulfate ion homeostasis;GO:0071486, cellular response to high light intensity	-	-0.138236	-0.75293	-0.684609	-0.275055	0.318141	-0.656354	0.0256814	-0.337115	0.0458911	0.100975	-0.726223	0.325069	0.405658	-0.547338	0.00559233	-0.474962	0.397754	0.159384	-0.265669	-0.585524	-0.550162	-0.436237	0.0257767	-0.318198	-0.387004	0.476168	-0.672882	-0.223476	-0.0273282	-0.451249	0.639305	-0.0309802	2
T_45559_c1_g2	LOB	gi|951056844|ref|XP_014521856.1| PREDICTED: ethylene-responsive transcription factor 3-like [Vigna radiata var. radiata] 1.7e-58	GO:0003677, DNA binding;GO:0003700, DNA binding transcription factor activity;GO:0005634, nucleus;GO:0006351, transcription, DNA-templated;GO:0006952, defense response;GO:0009873, ethylene-activated signaling pathway;GO:0010105, negative regulation of ethylene-activated signaling pathway	-	0.155808	0.725353	0.684359	0.433171	-0.353779	0.477307	0.344469	0.669674	0.202358	-0.305412	0.752925	-0.37236	-0.0692967	0.3105	0.0957873	0.358124	-0.484047	-0.245351	0.0938724	0.493117	0.384735	0.452602	-0.12394	0.206786	0.288643	-0.461983	0.671039	0.311372	-0.253928	0.341925	-0.454366	0.0784028	2
T_44831_c1_g1	C2H2	gi|356507349|ref|XP_003522430.1| PREDICTED: ribonuclease J-like isoform X1 [Glycine max] 0.0e+00	GO:0003723, RNA binding;GO:0004521, endoribonuclease activity;GO:0004534, 5'-3' exoribonuclease activity;GO:0005737, cytoplasm;GO:0006364, rRNA processing;GO:0008270, zinc ion binding;GO:0046872, metal ion binding	-	-0.0650766	-0.556611	-0.64502	0.0820512	0.148642	-0.445531	0.011246	-0.350939	-0.375225	0.578143	-0.723323	0.489429	0.525109	-0.524683	-0.249725	-0.342741	0.511431	0.323003	-0.362389	-0.557919	-0.484971	-0.590005	-0.397136	-0.698772	-0.850336	0.404112	-0.448207	0.205324	0.117866	-0.298981	0.342305	0.28925	2
T_40177_c1_g5	OFP	gi|356498721|ref|XP_003518198.1| PREDICTED: NAC domain-containing protein 59-like [Glycine max] 1.1e-187	GO:0003677, DNA binding;GO:0003700, DNA binding transcription factor activity;GO:0005634, nucleus;GO:0006351, transcription, DNA-templated;GO:0006355, regulation of transcription, DNA-templated	-	0.158956	0.305231	0.465201	0.100012	0.0478768	0.256922	0.233176	0.268342	0.392204	-0.543667	0.545205	-0.492624	-0.256198	0.382214	0.341988	0.281873	-0.437437	0.0407338	0.292436	0.487066	0.279006	0.517218	0.406434	0.724362	0.802023	-0.137396	0.317471	-0.285586	-0.26625	0.117652	-0.0366923	-0.0985346	2
T_40899_c2_g1	S1Fa-like	gi|947051321|gb|KRH00850.1| hypothetical protein GLYMA_18G237700 [Glycine max] 1.2e-126	GO:0003677, DNA binding;GO:0003700, DNA binding transcription factor activity;GO:0005634, nucleus;GO:0006351, transcription, DNA-templated;GO:0006355, regulation of transcription, DNA-templated;GO:0009651, response to salt stress	-	0.0792	-0.653231	-0.671878	-0.200544	0.203011	-0.671733	-0.0911526	-0.390004	-0.140355	0.349946	-0.759071	0.21334	0.483084	-0.664659	-0.310962	-0.522184	0.584276	0.112838	-0.457421	-0.635579	-0.60529	-0.590814	-0.131728	-0.702583	-0.605503	0.387213	-0.472558	0.081893	-0.056639	-0.166744	0.32257	0.0873667	2
T_46392_c1_g2	bZIP	gi|571554081|ref|XP_006603929.1| PREDICTED: truncated transcription factor CAULIFLOWER A-like [Glycine max] 1.8e-78	GO:0003677, DNA binding;GO:0003700, DNA binding transcription factor activity;GO:0005634, nucleus;GO:0006351, transcription, DNA-templated;GO:0009908, flower development;GO:0009911, positive regulation of flower development;GO:0010077, maintenance of inflorescence meristem identity;GO:0010154, fruit development;GO:0030154, cell differentiation	-	-0.0428572	-0.866506	-0.746825	-0.461794	-0.174304	-0.586376	0.155343	-0.433589	-0.0638527	0.0878741	-0.558686	0.0390167	0.106728	-0.599723	-0.0971757	-0.457692	0.171378	0.193853	-0.400541	-0.571334	-0.284949	-0.59916	0.0830627	-0.375596	-0.403867	0.265016	-0.565321	-0.475053	-0.379694	-0.383811	0.150768	-0.290325	2
T_43125_c3_g1	NAC	gi|356549269|ref|XP_003543018.1| PREDICTED: auxin response factor 3-like [Glycine max] 0.0e+00	GO:0003677, DNA binding;GO:0003700, DNA binding transcription factor activity;GO:0005634, nucleus;GO:0006351, transcription, DNA-templated;GO:0006355, regulation of transcription, DNA-templated;GO:0009733, response to auxin;GO:0009734, auxin-activated signaling pathway;GO:0009850, auxin metabolic process;GO:0010050, vegetative phase change;GO:0010158, abaxial cell fate specification;GO:0010582, f…	K14486-ko04075 Plant hormone signal transduction	0.324743	0.586438	0.441674	0.718361	0.292167	0.453369	-0.0702893	0.265311	-0.12702	0.184912	0.263593	-0.0103124	0.298836	0.203539	-0.298277	0.267249	0.218989	0.0569162	0.278274	0.277636	-0.135364	0.260154	-0.426639	-0.266108	-0.178985	-0.603589	0.550534	0.809667	0.234019	0.198094	0.062355	0.604961	2
T_44398_c6_g3	bHLH	gi|571480577|ref|XP_006588330.1| PREDICTED: trihelix transcription factor ASIL2-like [Glycine max] 3.0e-97	GO:0003677, DNA binding;GO:0003700, DNA binding transcription factor activity;GO:0005634, nucleus;GO:0006351, transcription, DNA-templated;GO:0006355, regulation of transcription, DNA-templated;GO:0009793, embryo development ending in seed dormancy;GO:0010431, seed maturation	-	-0.147185	0.747251	0.6991	0.129252	-0.37154	0.486398	0.229415	0.675545	0.346741	-0.399257	0.769388	-0.162104	-0.345438	0.459635	0.430394	0.382068	-0.677055	-0.569761	0.202075	0.452751	0.560501	0.574676	0.0229809	0.42996	0.473988	-0.295224	0.466	0.166937	0.0612821	0.265996	-0.437272	-0.301572	2
T_42418_c4_g1	C2C2->C2C2-Dof	gi|734430346|gb|KHN45462.1| DnaJ like subfamily C member 2 [Glycine soja] 3.7e-137	GO:0003677, DNA binding;GO:0003682, chromatin binding;GO:0005634, nucleus;GO:0005829, cytosol;GO:0006260, DNA replication;GO:0006351, transcription, DNA-templated;GO:0031965, nuclear membrane;GO:0042393, histone binding;GO:0043130, ubiquitin binding;GO:0045893, positive regulation of transcription, DNA-templated;GO:2000279, negative regulation of DNA biosynthetic process	-	-0.0427593	-0.692091	-0.729769	-0.160775	0.329468	-0.657805	-0.156905	-0.500661	-0.306343	0.426107	-0.861226	0.418076	0.509205	-0.557459	-0.244285	-0.481285	0.631225	0.293096	-0.437975	-0.577637	-0.659278	-0.608573	-0.216475	-0.56264	-0.693249	0.529752	-0.552185	0.00238066	0.0249081	-0.237623	0.490789	0.209393	2
T_41968_c0_g2	MYB->MYB	gi|734359971|gb|KHN15338.1| Pathogenesis-related homeodomain protein, partial [Glycine soja] 5.9e-260	GO:0003677, DNA binding;GO:0003700, DNA binding transcription factor activity;GO:0005634, nucleus;GO:0006351, transcription, DNA-templated;GO:0006952, defense response;GO:0008270, zinc ion binding;GO:0009733, response to auxin;GO:0043565, sequence-specific DNA binding;GO:0045893, positive regulation of transcription, DNA-templated	-	-0.182029	-0.794142	-0.748686	-0.346999	-0.196816	-0.590273	0.234795	-0.377138	-0.205031	0.309188	-0.675022	0.178557	0.311194	-0.620831	-0.0314176	-0.418379	0.304463	0.228847	-0.535183	-0.623124	-0.189216	-0.63201	-0.102477	-0.538518	-0.600964	0.461655	-0.613641	-0.258516	-0.253643	-0.389152	0.19776	-0.170048	2
T_41887_c4_g1	VOZ	gi|351727393|ref|NP_001237671.1| transcription factor [Glycine max] 8.0e-56	GO:0003700, DNA binding transcription factor activity;GO:0005516, calmodulin binding;GO:0005634, nucleus;GO:0006351, transcription, DNA-templated;GO:0010200, response to chitin;GO:0043565, sequence-specific DNA binding;GO:0044212, transcription regulatory region DNA binding	-	-0.114773	0.357739	0.463437	-0.0926402	-0.1149	0.232582	0.256548	0.49731	0.673229	-0.693241	0.603695	-0.362045	-0.394499	0.327588	0.52227	0.185722	-0.684831	-0.453299	0.265933	0.333963	0.423686	0.573884	0.59518	0.738755	0.917105	-0.166183	0.200577	-0.336629	-0.130126	0.0577877	-0.192819	-0.45878	2
T_46350_c1_g2	bHLH	gi|959092779|ref|NP_001304531.1| transcription repressor OFP8-like [Glycine max] 4.6e-23	GO:0005634, nucleus;GO:0006351, transcription, DNA-templated;GO:0045892, negative regulation of transcription, DNA-templated	-	0.113203	-0.573211	-0.670586	-0.0827335	-0.0355915	-0.377121	-0.0527962	-0.54392	-0.46293	0.575095	-0.724741	0.470096	0.188879	-0.362934	-0.262862	-0.400904	0.419515	0.383394	-0.356515	-0.558589	-0.275115	-0.456714	-0.366824	-0.501407	-0.794043	0.205418	-0.469688	0.00959147	0.122717	-0.0126428	0.231465	0.186024	2
T_44742_c2_g1	B3->B3-ARF	gi|356548125|ref|XP_003542454.1| PREDICTED: ethylene-responsive transcription factor RAP2-4 [Glycine max] 6.2e-86	GO:0003677, DNA binding;GO:0003700, DNA binding transcription factor activity;GO:0005634, nucleus;GO:0006351, transcription, DNA-templated;GO:0006970, response to osmotic stress;GO:0009409, response to cold;GO:0009414, response to water deprivation;GO:0009416, response to light stimulus;GO:0009611, response to wounding;GO:0009651, response to salt stress;GO:0009736, cytokinin-activated signaling …	-	0.0223328	0.181202	0.162012	-0.0620263	-0.100026	-0.171884	0.505338	0.670358	0.742903	-0.571795	0.266399	-0.326594	-0.0432925	0.0967799	0.472291	-0.212973	-0.546265	-0.507151	-0.130243	0.0902247	0.269568	0.353146	0.490825	0.767418	0.603282	-0.11865	-0.119477	-0.473061	-0.168096	0.301328	0.0489941	-0.284219	2
T_46840_c1_g1	bHLH	gi|356510776|ref|XP_003524110.1| PREDICTED: probable WRKY transcription factor 28 [Glycine max] 2.9e-68	GO:0003700, DNA binding transcription factor activity;GO:0005634, nucleus;GO:0006351, transcription, DNA-templated;GO:0043565, sequence-specific DNA binding	-	-0.110079	0.477452	0.609797	-0.119165	0.361284	0.283087	-0.112503	0.274821	0.3406	-0.659994	0.571737	-0.255883	-0.181013	0.669085	0.622135	0.421616	-0.442857	-0.193212	0.560446	0.603103	0.181141	0.658014	0.107873	0.828619	0.701502	-0.0728428	0.227774	-0.0290037	0.174346	0.0130066	0.213322	-0.169587	2
T_43193_c3_g2	GRAS	gi|734351292|gb|KHN12702.1| hypothetical protein glysoja_008665 [Glycine soja] 7.9e-224	GO:0005929, cilium;GO:0035091, phosphatidylinositol binding;GO:0061512, protein localization to cilium	-	-0.154848	-0.442461	-0.569285	0.131214	-0.296522	-0.205724	0.128628	-0.275368	-0.354001	0.580701	-0.549346	0.358841	0.206459	-0.630732	-0.478557	-0.273921	0.351764	0.11988	-0.533136	-0.591922	-0.0495227	-0.737156	-0.155849	-0.874525	-0.698167	0.0756529	-0.278536	0.108654	0.0184258	-0.207887	-0.150867	0.0687106	2
T_39878_c0_g3	C2H2	gi|955331140|ref|XP_014633488.1| PREDICTED: transcription factor DIVARICATA [Glycine max] 7.2e-84	GO:0003677, DNA binding;GO:0005634, nucleus;GO:0006351, transcription, DNA-templated;GO:0006355, regulation of transcription, DNA-templated;GO:0009908, flower development;GO:0048262, determination of dorsal/ventral asymmetry	-	-0.0668933	-0.724882	-0.659146	-0.430169	0.173632	-0.716886	0.0108868	-0.389193	0.229196	-0.0805807	-0.631179	0.0824025	0.181333	-0.491931	0.0659193	-0.558414	0.254841	0.060942	-0.361426	-0.578682	-0.435059	-0.36171	0.250118	-0.149858	-0.119827	0.453829	-0.65489	-0.416775	-0.263264	-0.155741	0.288418	-0.250225	2
T_43399_c2_g3	C2H2	gi|571436723|ref|XP_006573849.1| PREDICTED: heat stress transcription factor A-1b-like [Glycine max] 1.4e-175	GO:0003677, DNA binding;GO:0003700, DNA binding transcription factor activity;GO:0005634, nucleus;GO:0005737, cytoplasm;GO:0006351, transcription, DNA-templated;GO:0009408, response to heat;GO:0043565, sequence-specific DNA binding	-	0.130023	-0.469109	-0.516994	0.0216061	0.589026	-0.560193	-0.210202	-0.372932	-0.172466	0.30689	-0.757316	0.227928	0.663255	-0.414994	-0.28909	-0.444861	0.661326	0.310426	-0.186838	-0.462281	-0.753748	-0.36051	-0.29137	-0.421377	-0.591858	0.241373	-0.438149	0.185372	0.141279	-0.0967464	0.650859	0.471309	2
T_45750_c0_g2	B3->B3	gi|920687470|gb|KOM31453.1| hypothetical protein LR48_Vigan01g100800, partial [Vigna angularis] 1.8e-74	GO:0003700, DNA binding transcription factor activity;GO:0005634, nucleus;GO:0006351, transcription, DNA-templated;GO:0009744, response to sucrose;GO:0009965, leaf morphogenesis;GO:0043565, sequence-specific DNA binding;GO:0048826, cotyledon morphogenesis;GO:0080022, primary root development	-	0.140377	-0.400007	-0.532129	0.339009	0.273803	-0.438549	0.054047	-0.201405	-0.208159	0.493868	-0.681959	0.209522	0.703141	-0.53862	-0.441941	-0.462401	0.584203	0.408044	-0.346017	-0.503534	-0.641001	-0.420218	-0.291558	-0.568468	-0.714114	0.16737	-0.294305	0.20826	-0.116938	-0.0443429	0.306374	0.614961	2
T_38934_c0_g6	NF-Y->NF-YB	gi|965665106|dbj|BAT80594.1| hypothetical protein VIGAN_03018500 [Vigna angularis var. angularis] 5.5e-75	GO:0003700, DNA binding transcription factor activity;GO:0005634, nucleus;GO:0006351, transcription, DNA-templated;GO:0006355, regulation of transcription, DNA-templated;GO:0043565, sequence-specific DNA binding	-	-0.123388	0.167709	0.121641	0.0067841	-0.321759	-0.206457	0.643896	0.742982	0.842977	-0.657624	0.263428	-0.41048	0.0500912	-0.15927	0.368516	-0.323265	-0.617261	-0.609696	-0.333607	-0.0965772	0.23011	0.262233	0.487306	0.473851	0.494839	-0.261838	-0.0580361	-0.4208	-0.491027	0.265248	-0.21872	-0.341252	2
T_41530_c0_g1	GRAS	gi|734405477|gb|KHN33279.1| Nuclear transcription factor Y subunit A-3 [Glycine soja] 2.9e-32	GO:0003677, DNA binding;GO:0003700, DNA binding transcription factor activity;GO:0006351, transcription, DNA-templated;GO:0016602, CCAAT-binding factor complex	-	0.104547	-0.557486	-0.665314	-0.0110875	0.452785	-0.617295	-0.13947	-0.271936	-0.226011	0.531501	-0.821286	0.352695	0.605526	-0.519564	-0.312202	-0.537775	0.63623	0.174325	-0.372885	-0.503551	-0.717949	-0.506245	-0.0818194	-0.416411	-0.6072	0.404108	-0.453318	0.0380953	0.166112	-0.139967	0.537563	0.382331	2
T_41113_c0_g2	Trihelix	gi|951016508|ref|XP_014511135.1| PREDICTED: uncharacterized protein LOC106769865 isoform X1 [Vigna radiata var. radiata] 1.1e-62	GO:0003677, DNA binding;GO:0005634, nucleus;GO:0006351, transcription, DNA-templated;GO:0006355, regulation of transcription, DNA-templated	-	-0.272929	-0.413986	-0.422373	-0.170383	0.211076	-0.0315847	-0.534866	-0.5929	-0.781824	0.466327	-0.493981	0.549866	0.236077	-0.0575552	-0.386018	0.0664065	0.520316	0.51249	0.110462	-0.158439	-0.191339	-0.516582	-0.454659	-0.491171	-0.730334	0.241547	-0.288301	0.161881	0.344136	-0.489044	0.266699	0.325053	2
T_45105_c0_g2	LOB	gi|356553419|ref|XP_003545054.1| PREDICTED: protein FAR1-RELATED SEQUENCE 5-like [Glycine max] 0.0e+00	GO:0005634, nucleus;GO:0006355, regulation of transcription, DNA-templated;GO:0008270, zinc ion binding	-	0.33806	-0.356685	-0.396708	0.157229	0.563074	-0.297898	-0.34067	-0.404781	-0.439617	0.517949	-0.596801	0.246627	0.526259	-0.324679	-0.536352	-0.250505	0.742428	0.394455	-0.0652007	-0.242885	-0.736259	-0.386731	-0.310267	-0.524707	-0.610485	0.0715167	-0.111048	0.327603	0.217033	-0.130477	0.563786	0.593532	2
T_43939_c4_g1	AP2/ERF->AP2/ERF-ERF	gi|955359563|ref|XP_014621421.1| PREDICTED: protein SCARECROW-like [Glycine max] 1.2e-271	GO:0003700, DNA binding transcription factor activity;GO:0005634, nucleus;GO:0006351, transcription, DNA-templated;GO:0006355, regulation of transcription, DNA-templated;GO:0008356, asymmetric cell division;GO:0009630, gravitropism;GO:0009956, radial pattern formation;GO:0043565, sequence-specific DNA binding;GO:0048366, leaf development;GO:0051457, maintenance of protein location in nucleus;GO:0…	-	-0.104322	0.102137	0.203972	-0.0787819	0.0708166	-0.198425	0.349358	0.44741	0.727307	-0.760002	0.297798	-0.445862	0.0310413	0.0115841	0.387715	-0.0731569	-0.454833	-0.34282	-0.0347574	0.121504	0.0475082	0.186975	0.39424	0.558269	0.612618	-0.0314485	-0.0779096	-0.396549	-0.326462	0.0832277	0.0512203	-0.286385	2
T_41402_c3_g3	C3H	gi|593698032|ref|XP_007149489.1| hypothetical protein PHAVU_005G074700g [Phaseolus vulgaris] 1.2e-29	GO:0003677, DNA binding;GO:0003700, DNA binding transcription factor activity;GO:0005634, nucleus;GO:0006351, transcription, DNA-templated;GO:0009723, response to ethylene;GO:0009737, response to abscisic acid;GO:0009864, induced systemic resistance, jasmonic acid mediated signaling pathway;GO:0009873, ethylene-activated signaling pathway;GO:0010105, negative regulation of ethylene-activated sign…	-	0.0682509	0.259687	0.255022	0.0279225	0.0195422	-0.169645	0.441505	0.632302	0.748824	-0.622129	0.29281	-0.32016	-9.58456e-05	0.0939256	0.453032	-0.184652	-0.57266	-0.494636	-0.0856018	0.110554	0.0843229	0.415385	0.3774	0.721282	0.580233	-0.122472	-0.0130996	-0.338103	-0.134946	0.350039	0.0961194	-0.200314	2
T_40928_c2_g1	S1Fa-like	gi|356554131|ref|XP_003545402.1| PREDICTED: uncharacterized protein LOC100803515 [Glycine max] 7.4e-258	GO:0003677, DNA binding;GO:0003700, DNA binding transcription factor activity;GO:0005634, nucleus;GO:0006351, transcription, DNA-templated;GO:0009908, flower development	-	-0.240636	-0.712379	-0.670375	-0.320172	0.282819	-0.683671	-0.0357939	-0.412323	-0.0790236	0.236474	-0.773339	0.2063	0.487896	-0.62522	-0.00651065	-0.478897	0.406656	0.102695	-0.384325	-0.626731	-0.629074	-0.499036	-0.0428838	-0.480586	-0.495391	0.527064	-0.576624	-0.117733	-0.0528308	-0.426075	0.453574	-0.0338661	2
T_45727_c1_g3	B3->B3	gi|959092909|ref|NP_001304640.1| ABSCISIC ACID-INSENSITIVE 5-like protein 2 [Glycine max] 2.5e-121	GO:0003700, DNA binding transcription factor activity;GO:0005634, nucleus;GO:0006351, transcription, DNA-templated;GO:0009737, response to abscisic acid;GO:0009738, abscisic acid-activated signaling pathway;GO:0043565, sequence-specific DNA binding	K14432-ko04075 Plant hormone signal transduction	-0.188234	-0.682215	-0.770027	-0.203239	-0.211514	-0.452534	0.0818432	-0.231164	-0.251711	0.284806	-0.658706	0.647746	0.178504	-0.542345	-0.284086	-0.437294	0.264326	0.0447067	-0.521842	-0.615623	-0.0809345	-0.73353	-0.116218	-0.545532	-0.699313	0.223292	-0.613	-0.200814	0.0591733	-0.293772	0.219014	-0.0945462	2
T_43082_c1_g1	GARP->GARP-ARR-B	gi|356565193|ref|XP_003550828.1| PREDICTED: zinc finger CCCH domain-containing protein 34-like [Glycine max] 1.4e-263	GO:0003677, DNA binding;GO:0046872, metal ion binding	-	0.189545	-0.215111	-0.401027	0.430702	0.144048	-0.126659	-0.0583165	-0.259256	-0.430545	0.665745	-0.521808	0.348399	0.457503	-0.35613	-0.538928	-0.22871	0.631475	0.383993	-0.261194	-0.356331	-0.381472	-0.442983	-0.420314	-0.712318	-0.768161	-0.0433042	-0.106178	0.428087	0.0781053	0.00955248	0.129335	0.564804	2
T_39863_c1_g2	MYB->MYB	gi|1012336269|gb|KYP47574.1| Ocs element-binding factor 1, partial [Cajanus cajan] 2.3e-64	GO:0003700, DNA binding transcription factor activity;GO:0005634, nucleus;GO:0006351, transcription, DNA-templated;GO:0006971, hypotonic response;GO:0009267, cellular response to starvation;GO:0043565, sequence-specific DNA binding;GO:0045735, nutrient reservoir activity;GO:0045893, positive regulation of transcription, DNA-templated;GO:0046982, protein heterodimerization activity;GO:2000693, pos…	-	-0.0809594	-0.271528	-0.242101	-0.255023	-0.598233	-0.255531	0.585134	0.339226	0.607115	-0.339036	0.0286364	-0.229616	-0.345999	-0.352528	0.145129	-0.372361	-0.431579	-0.422073	-0.463013	-0.294707	0.45282	-0.105366	0.77458	0.278519	0.489991	-0.00607223	-0.288512	-0.778056	-0.452495	0.091475	-0.31302	-0.604255	2
T_42736_c1_g2	C3H	gi|356556106|ref|XP_003546368.1| PREDICTED: ethylene-responsive transcription factor RAP2-3-like [Glycine max] 3.8e-72	GO:0003677, DNA binding;GO:0003700, DNA binding transcription factor activity;GO:0005634, nucleus;GO:0005737, cytoplasm;GO:0005886, plasma membrane;GO:0006351, transcription, DNA-templated;GO:0008219, cell death;GO:0009723, response to ethylene;GO:0009735, response to cytokinin;GO:0009753, response to jasmonic acid;GO:0009873, ethylene-activated signaling pathway;GO:0010286, heat acclimation;GO:0…	-	0.0612595	0.587584	0.681536	-0.0406517	0.418157	0.480593	-0.453792	0.134708	-0.0724593	-0.385681	0.562717	-0.0709675	-0.225202	0.788769	0.216172	0.583334	-0.0463847	-0.0271648	0.643228	0.784589	0.189682	0.537511	-0.10026	0.606362	0.507995	-0.156753	0.414853	0.215039	0.343239	0.0827921	0.26116	0.0929952	2
T_43286_c1_g5	GRAS	gi|571567685|ref|XP_006606110.1| PREDICTED: myb-related protein 308-like [Glycine max] 6.9e-137	GO:0003677, DNA binding;GO:0005634, nucleus;GO:0006351, transcription, DNA-templated;GO:0006355, regulation of transcription, DNA-templated	-	-0.2969	-0.654907	-0.674278	-0.266748	-0.0588406	-0.473389	-0.0627634	-0.411504	-0.352661	0.573166	-0.725604	0.295418	0.337133	-0.594538	-0.243078	-0.367274	0.459732	0.198958	-0.357322	-0.609924	-0.347467	-0.647677	-0.174702	-0.632118	-0.705174	0.511539	-0.552695	-0.111511	0.0469846	-0.408407	0.163353	0.0419157	2
T_46690_c0_g1	bZIP	gi|356541228|ref|XP_003539082.1| PREDICTED: scarecrow-like protein 14 [Glycine max] 9.8e-300	GO:0003700, DNA binding transcription factor activity;GO:0005634, nucleus;GO:0005829, cytosol;GO:0006351, transcription, DNA-templated;GO:0006355, regulation of transcription, DNA-templated;GO:0009410, response to xenobiotic stimulus;GO:0043565, sequence-specific DNA binding;GO:0045893, positive regulation of transcription, DNA-templated	-	0.154906	0.767978	0.732614	0.395885	0.218399	0.415	0.190617	0.663003	0.423132	-0.41187	0.620107	-0.386832	0.0225483	0.487878	0.297064	0.335779	-0.314796	-0.335368	0.318164	0.557749	0.296341	0.648094	0.12963	0.579995	0.635589	-0.454042	0.485244	0.264728	0.156006	0.327343	0.0669488	0.140616	2
T_38505_c0_g1	C2H2	gi|356560181|ref|XP_003548373.1| PREDICTED: zinc finger CCCH domain-containing protein 62-like isoform X1 [Glycine max] 3.0e-107	GO:0003677, DNA binding;GO:0046872, metal ion binding	-	-0.14354	-0.742067	-0.724004	-0.314663	-0.26342	-0.346871	-0.0872961	-0.562043	-0.432483	0.438037	-0.600944	0.254984	0.0708958	-0.415066	-0.368891	-0.277324	0.464738	0.48864	-0.301338	-0.476781	-0.0224582	-0.694572	-0.0854089	-0.505779	-0.579505	0.394535	-0.565361	-0.321744	-0.212892	-0.307249	-0.0584266	-0.00831611	2
T_43982_c3_g5	AP2/ERF->AP2/ERF-ERF	gi|947072493|gb|KRH21384.1| hypothetical protein GLYMA_13G236500 [Glycine max] 2.2e-83	GO:0003677, DNA binding;GO:0003700, DNA binding transcription factor activity;GO:0005634, nucleus;GO:0006351, transcription, DNA-templated;GO:0006952, defense response;GO:0009873, ethylene-activated signaling pathway	-	0.0509267	0.176383	0.189399	-0.104213	0.0193018	-0.173225	0.357316	0.548377	0.721683	-0.620306	0.283157	-0.375651	-0.0724418	0.173929	0.464577	-0.176841	-0.508954	-0.411127	-0.0301403	0.159924	0.168135	0.395158	0.508419	0.833492	0.677075	-0.0582872	-0.0868387	-0.486292	-0.204863	0.315925	0.0323793	-0.252894	2
T_42626_c0_g1	NF-Y->NF-YC	gi|955386090|ref|XP_014626723.1| PREDICTED: 65-kDa microtubule-associated protein 8-like isoform X1 [Glycine max] 1.2e-236	GO:0000226, microtubule cytoskeleton organization;GO:0000910, cytokinesis;GO:0000922, spindle pole;GO:0005634, nucleus;GO:0005737, cytoplasm;GO:0005874, microtubule	-	0.0387302	-0.70368	-0.769074	-0.214366	-0.144658	-0.365779	-0.171689	-0.414115	-0.399546	0.515527	-0.673685	0.46294	0.123272	-0.425478	-0.517152	-0.464014	0.519074	0.383183	-0.255757	-0.509016	-0.251548	-0.559634	-0.0363253	-0.421256	-0.650016	0.242175	-0.515591	-0.296634	-0.115748	-0.214151	0.113965	0.18463	2
T_39863_c2_g4	bZIP	gi|356551950|ref|XP_003544335.1| PREDICTED: ocs element-binding factor 1 [Glycine max] 8.6e-47	GO:0003700, DNA binding transcription factor activity;GO:0009845, seed germination;GO:0043565, sequence-specific DNA binding;GO:0044212, transcription regulatory region DNA binding;GO:0046982, protein heterodimerization activity	-	-0.259953	-0.738488	-0.701101	-0.266332	0.0792913	-0.38013	-0.215189	-0.548153	-0.469808	0.446254	-0.69804	0.313397	0.319683	-0.476143	-0.380846	-0.280334	0.532663	0.448429	-0.174326	-0.47571	-0.369315	-0.686983	-0.163395	-0.532992	-0.676773	0.364106	-0.536993	-0.208864	-0.0252432	-0.545505	0.275693	0.170841	2
T_42196_c0_g7	bHLH	gi|356550347|ref|XP_003543549.1| PREDICTED: transcription factor bHLH122 [Glycine max] 1.8e-15	GO:0001046, core promoter sequence-specific DNA binding;GO:0001228, transcriptional activator activity, RNA polymerase II transcription regulatory region sequence-specific DNA binding;GO:0003700, DNA binding transcription factor activity;GO:0005634, nucleus;GO:0006355, regulation of transcription, DNA-templated;GO:0006366, transcription by RNA polymerase II;GO:0010119, regulation of stomatal move…	-	-0.278269	-0.750643	-0.677788	-0.334365	0.217807	-0.533808	-0.107831	-0.590282	-0.207961	0.131882	-0.742493	0.371498	0.320743	-0.535003	-0.0993667	-0.325776	0.41044	0.218883	-0.281462	-0.626128	-0.399521	-0.630159	-0.232563	-0.603179	-0.599081	0.315948	-0.655124	-0.0653729	0.0953379	-0.493207	0.503693	-0.0996585	2
T_41550_c1_g8	Trihelix	gi|593689250|ref|XP_007145244.1| hypothetical protein PHAVU_007G222800g [Phaseolus vulgaris] 1.3e-163	GO:0003677, DNA binding;GO:0003700, DNA binding transcription factor activity;GO:0005634, nucleus;GO:0006351, transcription, DNA-templated;GO:0006355, regulation of transcription, DNA-templated;GO:0009909, regulation of flower development;GO:0010200, response to chitin;GO:0042803, protein homodimerization activity;GO:0046621, negative regulation of organ growth;GO:0048441, petal development;GO:00…	-	-0.242095	-0.668226	-0.63409	-0.148147	-0.0144659	-0.639025	0.257604	-0.36668	0.0711934	0.103101	-0.67023	0.214765	0.320013	-0.725162	0.0112765	-0.441239	0.177079	0.0661329	-0.589885	-0.730918	-0.345246	-0.584269	-0.0375951	-0.604273	-0.4293	0.475526	-0.571147	-0.120662	-0.144515	-0.268807	0.211276	-0.201994	2
T_44724_c2_g4	B3->B3-ARF	gi|571512318|ref|XP_003544394.2| PREDICTED: auxin response factor 5-like [Glycine max] 0.0e+00	GO:0003677, DNA binding;GO:0003700, DNA binding transcription factor activity;GO:0005634, nucleus;GO:0006351, transcription, DNA-templated;GO:0006355, regulation of transcription, DNA-templated;GO:0009733, response to auxin;GO:0009734, auxin-activated signaling pathway;GO:0009793, embryo development ending in seed dormancy;GO:0009908, flower development;GO:0009942, longitudinal axis specification…	K14486-ko04075 Plant hormone signal transduction	0.0915597	0.417288	0.495969	0.00182147	0.686081	0.27848	-0.619803	-0.0581045	-0.171526	-0.267003	0.344776	-0.0149671	0.0434996	0.700293	0.122666	0.479051	0.211	0.212796	0.622858	0.708405	-0.18538	0.392618	-0.195757	0.469592	0.31986	0.0966767	0.322492	0.303876	0.242621	0.0241314	0.328086	0.309608	2
T_41294_c3_g9	AP2/ERF->AP2/ERF-ERF	gi|955328454|ref|XP_014632895.1| PREDICTED: ethylene-responsive transcription factor ERF034-like [Glycine max] 7.8e-58	GO:0003677, DNA binding;GO:0003700, DNA binding transcription factor activity;GO:0005634, nucleus;GO:0006351, transcription, DNA-templated;GO:0009873, ethylene-activated signaling pathway;GO:0044212, transcription regulatory region DNA binding	-	0.194718	-0.36944	-0.521003	0.17695	-0.0834623	-0.153167	-0.035751	-0.398914	-0.455454	0.721767	-0.571484	0.466938	0.150657	-0.301756	-0.380154	-0.301242	0.434585	0.387483	-0.227913	-0.465222	-0.220936	-0.33706	-0.340998	-0.544399	-0.742612	0.0845118	-0.266512	0.172943	0.158745	0.0335782	0.0732632	0.331646	2
T_40204_c5_g9	C2H2	gi|955352957|ref|XP_014620008.1| PREDICTED: zinc finger protein WIP2-like [Glycine max] 6.0e-146	GO:0003676, nucleic acid binding;GO:0003700, DNA binding transcription factor activity;GO:0005634, nucleus;GO:0006351, transcription, DNA-templated;GO:0006355, regulation of transcription, DNA-templated;GO:0009860, pollen tube growth;GO:0010500, transmitting tissue development;GO:0046872, metal ion binding;GO:1990058, fruit replum development	-	0.0376723	-0.616273	-0.61367	-0.234469	0.342237	-0.748768	-0.00331084	-0.317378	0.0012154	0.209114	-0.709396	-0.0649983	0.517954	-0.515598	-0.105485	-0.518184	0.478061	0.174001	-0.462967	-0.464994	-0.549808	-0.510926	0.092463	-0.234213	-0.297781	0.521862	-0.536657	-0.227221	-0.145848	-0.0566524	0.354898	0.111552	2
T_44858_c2_g1	NAC	gi|356496665|ref|XP_003517186.1| PREDICTED: NAC domain-containing protein 37 [Glycine max] 1.6e-180	GO:0003677, DNA binding;GO:0003700, DNA binding transcription factor activity;GO:0005634, nucleus;GO:0006351, transcription, DNA-templated;GO:0006355, regulation of transcription, DNA-templated;GO:0007275, multicellular organism development;GO:0010200, response to chitin;GO:0043565, sequence-specific DNA binding;GO:0044212, transcription regulatory region DNA binding;GO:0048759, xylem vessel memb…	-	0.167163	-0.468147	-0.566267	-0.0648413	0.384305	-0.55782	-0.15627	-0.192595	-0.142651	0.51989	-0.709697	0.146054	0.590446	-0.544152	-0.311567	-0.561693	0.633255	0.0357775	-0.325183	-0.483384	-0.77047	-0.33713	0.00822225	-0.47789	-0.51722	0.245558	-0.272845	0.122135	-0.0109598	-0.131349	0.378467	0.315279	2
T_40778_c0_g4	WRKY	gi|920701774|gb|KOM44999.1| hypothetical protein LR48_Vigan06g030500 [Vigna angularis] 4.5e-94	GO:0003700, DNA binding transcription factor activity;GO:0005516, calmodulin binding;GO:0005634, nucleus;GO:0006351, transcription, DNA-templated;GO:0010200, response to chitin;GO:0043565, sequence-specific DNA binding;GO:0044212, transcription regulatory region DNA binding	-	-0.032509	0.557664	0.652621	0.17607	-0.302474	0.62849	0.150701	0.427811	0.314538	-0.536471	0.842327	-0.452185	-0.445924	0.460559	0.167297	0.475654	-0.620662	-0.143037	0.433647	0.561358	0.572346	0.52907	0.336581	0.508732	0.740984	-0.479618	0.565852	-0.0972841	-0.264605	0.0540154	-0.532294	-0.179115	2
T_44317_c3_g4	E2F-DP	gi|1012341498|gb|KYP52701.1| Transcription factor Dp-1 [Cajanus cajan] 5.9e-99	GO:0000082, G1/S transition of mitotic cell cycle;GO:0000981, RNA polymerase II transcription factor activity, sequence-specific DNA binding;GO:0003677, DNA binding;GO:0003700, DNA binding transcription factor activity;GO:0005634, nucleus;GO:0005667, transcription factor complex;GO:0005737, cytoplasm;GO:0006351, transcription, DNA-templated;GO:0006357, regulation of transcription by RNA polymeras…	K04683-ko04110 Cell cycle;ko04350 TGF-beta signaling pathway	-0.064952	-0.765262	-0.640345	-0.485969	0.197183	-0.642072	-0.047277	-0.516981	-0.0717003	0.104853	-0.681077	0.309482	0.134461	-0.408267	0.0848713	-0.374112	0.368405	0.19949	-0.276144	-0.499302	-0.357221	-0.433423	-0.0173784	-0.219816	-0.310452	0.610718	-0.70011	-0.324964	0.0550255	-0.307206	0.598708	-0.213875	2
T_39517_c4_g1	MYB->MYB-related	gi|571548499|ref|XP_006602810.1| PREDICTED: AT-rich interactive domain-containing protein 1-like [Glycine max] 2.8e-133	GO:0003677, DNA binding;GO:0005634, nucleus;GO:0005773, vacuole;GO:0006351, transcription, DNA-templated;GO:0006355, regulation of transcription, DNA-templated	-	-0.189404	-0.697889	-0.762899	-0.301444	0.173164	-0.584301	-0.051885	-0.41115	-0.300809	0.455863	-0.884066	0.411161	0.419691	-0.510451	-0.138853	-0.499626	0.531739	0.146505	-0.43445	-0.632718	-0.344695	-0.583224	-0.142692	-0.437765	-0.679697	0.348096	-0.696946	-0.151288	0.193707	-0.292176	0.532845	0.0736807	2
T_40122_c3_g6	AP2/ERF->AP2/ERF-ERF	gi|920703577|gb|KOM46802.1| hypothetical protein LR48_Vigan07g050600 [Vigna angularis] 1.3e-55	GO:0003677, DNA binding;GO:0003700, DNA binding transcription factor activity;GO:0005634, nucleus;GO:0006351, transcription, DNA-templated;GO:0006952, defense response;GO:0009873, ethylene-activated signaling pathway;GO:0010105, negative regulation of ethylene-activated signaling pathway	-	-0.108923	0.56081	0.625137	-0.101231	-0.244943	0.209042	0.237387	0.585115	0.533064	-0.732817	0.718811	-0.469144	-0.266444	0.406333	0.491957	0.261121	-0.621843	-0.475208	0.132641	0.468283	0.407058	0.506543	0.131596	0.629992	0.644704	-0.194361	0.298721	-0.13827	-0.281483	0.304491	-0.306824	-0.378178	2
T_42214_c5_g4	bHLH	gi|734378583|gb|KHN22140.1| Transcription factor bHLH25 [Glycine soja] 2.7e-86	GO:0003677, DNA binding;GO:0003700, DNA binding transcription factor activity;GO:0005634, nucleus;GO:0006351, transcription, DNA-templated;GO:0006355, regulation of transcription, DNA-templated;GO:0032440, 2-alkenal reductase [NAD(P)] activity	-	0.0750153	-0.73111	-0.725903	-0.365979	0.163259	-0.561496	-0.128729	-0.410329	-0.327398	0.309783	-0.669444	0.1304	0.35716	-0.325877	-0.244646	-0.411512	0.480944	0.370173	-0.291089	-0.356374	-0.284237	-0.594971	-0.0116158	-0.186344	-0.486209	0.346477	-0.575622	-0.329219	-0.0668596	-0.204245	0.327199	0.139843	2
T_45269_c3_g2	TCP	gi|920712838|gb|KOM54087.1| hypothetical protein LR48_Vigan09g274600 [Vigna angularis] 3.6e-132	GO:0001047, core promoter binding;GO:0003700, DNA binding transcription factor activity;GO:0005634, nucleus;GO:0006351, transcription, DNA-templated;GO:0006355, regulation of transcription, DNA-templated;GO:0044212, transcription regulatory region DNA binding	-	0.110489	0.854872	0.768026	0.541653	0.101831	0.444824	0.0818118	0.641615	0.171591	-0.290962	0.659631	-0.280696	0.187193	0.348028	0.0391388	0.401055	-0.240011	-0.318336	0.195944	0.541632	0.0693392	0.416507	-0.297401	0.0990667	0.199194	-0.482247	0.699119	0.627805	0.0308602	0.318593	-0.174631	0.283553	2
T_44347_c1_g3	C2C2->C2C2-Dof	gi|356504183|ref|XP_003520878.1| PREDICTED: dof zinc finger protein DOF2.5-like isoform X1 [Glycine max] 4.4e-110	GO:0003677, DNA binding;GO:0005634, nucleus;GO:0006351, transcription, DNA-templated;GO:0006355, regulation of transcription, DNA-templated;GO:0046872, metal ion binding	-	-0.00859798	-0.624835	-0.611284	-0.346884	0.553154	-0.613811	-0.404	-0.493339	-0.258454	0.217783	-0.737128	0.35605	0.4482	-0.333237	-0.195727	-0.390366	0.643094	0.209888	-0.16435	-0.381648	-0.703475	-0.502019	-0.20143	-0.331887	-0.536971	0.41464	-0.545217	-0.0236762	0.159757	-0.269825	0.650557	0.167523	2
T_36751_c0_g2	C2H2	gi|356568969|ref|XP_003552680.1| PREDICTED: zinc finger protein ZAT11-like [Glycine max] 2.7e-79	GO:0003700, DNA binding transcription factor activity;GO:0005634, nucleus;GO:0006351, transcription, DNA-templated;GO:0006355, regulation of transcription, DNA-templated;GO:0010200, response to chitin;GO:0043565, sequence-specific DNA binding;GO:0044212, transcription regulatory region DNA binding;GO:0046872, metal ion binding;GO:0071289, cellular response to nickel ion;GO:2000280, regulation of …	-	0.116288	0.215964	0.348976	-0.0266785	0.152946	0.00675766	0.228196	0.316175	0.641228	-0.66266	0.414561	-0.535309	-0.15202	0.264741	0.420582	0.0594441	-0.420423	-0.142702	0.213963	0.313332	0.103872	0.489635	0.484305	0.760876	0.823058	-0.0714589	0.108108	-0.365271	-0.294032	0.187186	0.0194108	-0.191677	2
T_45938_c0_g1	WRKY	gi|351726405|ref|NP_001238661.1| transcription factor [Glycine max] 2.9e-47	GO:0003700, DNA binding transcription factor activity;GO:0005516, calmodulin binding;GO:0005634, nucleus;GO:0006351, transcription, DNA-templated;GO:0010200, response to chitin;GO:0042742, defense response to bacterium;GO:0043565, sequence-specific DNA binding	-	-0.0395843	0.295902	0.407789	-0.166244	-0.252916	0.238005	0.216864	0.462103	0.567787	-0.66144	0.619542	-0.410425	-0.467042	0.325049	0.3511	0.189761	-0.569172	-0.374861	0.196442	0.389726	0.533828	0.430429	0.626621	0.703528	0.896584	-0.186995	0.203311	-0.442986	-0.278431	0.10459	-0.304837	-0.465548	2
T_41036_c0_g1	bZIP	gi|356545733|ref|XP_003541290.1| PREDICTED: heat stress transcription factor A-2-like [Glycine max] 4.3e-197	GO:0001666, response to hypoxia;GO:0003700, DNA binding transcription factor activity;GO:0005634, nucleus;GO:0005737, cytoplasm;GO:0006351, transcription, DNA-templated;GO:0009408, response to heat;GO:0009644, response to high light intensity;GO:0010200, response to chitin;GO:0010286, heat acclimation;GO:0034605, cellular response to heat;GO:0034620, cellular response to unfolded protein;GO:00425…	-	-0.160932	-0.528063	-0.65182	-0.341976	-0.291512	-0.611969	0.236047	-0.141659	0.071003	0.17527	-0.656741	0.52844	-0.00891021	-0.567764	0.0459116	-0.621116	0.00379939	-0.377996	-0.702252	-0.758541	-0.117615	-0.485867	-0.0888468	-0.34644	-0.540849	0.219644	-0.671157	-0.278354	0.169558	0.0973249	0.218241	-0.393915	2
T_43624_c0_g2	WRKY	gi|947118661|gb|KRH66910.1| hypothetical protein GLYMA_03G136100 [Glycine max] 2.5e-131	GO:0003677, DNA binding;GO:0003700, DNA binding transcription factor activity;GO:0005634, nucleus;GO:0006351, transcription, DNA-templated;GO:0007275, multicellular organism development;GO:0009873, ethylene-activated signaling pathway	-	-0.41441	-0.56059	-0.656022	-0.39639	-0.281392	-0.566011	0.0840856	-0.220696	-0.104453	0.389869	-0.683332	0.267985	0.282345	-0.650756	-0.0456548	-0.527358	0.195997	-0.201674	-0.542926	-0.775135	-0.227798	-0.558753	-0.182089	-0.628089	-0.708916	0.359381	-0.621743	-0.108376	0.00779527	-0.216439	-0.0296	-0.237211	2
T_42689_c3_g3	bZIP	gi|703094544|ref|XP_010095295.1| hypothetical protein L484_014637 [Morus notabilis] 3.5e-87	GO:0003677, DNA binding;GO:0003700, DNA binding transcription factor activity;GO:0006351, transcription, DNA-templated;GO:0009742, brassinosteroid mediated signaling pathway	K14503-ko04075 Plant hormone signal transduction	0.0331865	0.384966	0.407421	-0.0612901	-0.0232149	0.145715	0.25202	0.55319	0.649525	-0.57758	0.469877	-0.315999	-0.296759	0.39916	0.500615	0.0474549	-0.552284	-0.427429	0.211188	0.324077	0.40766	0.638332	0.555439	0.898282	0.848963	-0.179716	0.0975886	-0.36249	-0.0231624	0.286383	-0.0299735	-0.282322	2
T_39926_c1_g1	MYB->MYB-related	gi|356500950|ref|XP_003519293.1| PREDICTED: pathogenesis-related genes transcriptional activator PTI6-like [Glycine max] 6.1e-98	GO:0003677, DNA binding;GO:0003700, DNA binding transcription factor activity;GO:0005634, nucleus;GO:0006351, transcription, DNA-templated;GO:0006952, defense response	-	0.0889849	0.293351	0.30822	0.0096976	0.198063	-0.211846	0.404385	0.550002	0.735195	-0.660389	0.286081	-0.323584	0.0951421	0.18294	0.652863	-0.118324	-0.5538	-0.468274	-0.040039	0.149799	-0.0109671	0.507348	0.224321	0.708766	0.55477	-0.0353548	-0.00124088	-0.147043	-0.061608	0.346384	0.216514	-0.217359	2
T_43738_c0_g1	bHLH	gi|955307471|ref|XP_006575122.2| PREDICTED: condensin complex subunit 1 isoform X2 [Glycine max] 0.0e+00	GO:0000779, condensed chromosome, centromeric region;GO:0000793, condensed chromosome;GO:0000796, condensin complex;GO:0000799, nuclear condensin complex;GO:0003682, chromatin binding;GO:0005634, nucleus;GO:0005654, nucleoplasm;GO:0005737, cytoplasm;GO:0007076, mitotic chromosome condensation;GO:0010032, meiotic chromosome condensation;GO:0016020, membrane;GO:0042393, histone binding;GO:0045120, …	K06677-ko04111 Cell cycle - yeast	-0.406349	-0.454923	-0.543383	-0.00922028	-0.642405	-0.284504	0.573713	0.0534796	0.171647	0.226291	-0.379914	0.214712	0.0221942	-0.724253	-0.00781805	-0.421957	-0.206747	-0.233544	-0.650647	-0.734487	0.172333	-0.45769	0.241495	-0.549884	-0.321308	0.136359	-0.382088	-0.270267	-0.276624	-0.261337	-0.363419	-0.386198	2
T_41586_c0_g1	B3->B3	gi|920682791|gb|KOM29563.1| hypothetical protein LR48_Vigan727s002200 [Vigna angularis] 9.4e-98	GO:0003677, DNA binding;GO:0003700, DNA binding transcription factor activity;GO:0005634, nucleus;GO:0006351, transcription, DNA-templated;GO:0006355, regulation of transcription, DNA-templated;GO:0009266, response to temperature stimulus;GO:0009740, gibberellic acid mediated signaling pathway;GO:0010452, histone H3-K36 methylation;GO:0048579, negative regulation of long-day photoperiodism, flowe…	-	-0.0889239	-0.547369	-0.654132	-0.107047	0.0143581	-0.711497	0.204961	-0.151806	-0.0746624	0.388648	-0.736332	0.224907	0.517312	-0.643739	-0.120657	-0.536903	0.354656	-0.00636484	-0.668193	-0.645836	-0.368041	-0.660855	-0.197998	-0.516875	-0.65429	0.491783	-0.600356	-0.0505036	0.0366313	-0.012641	0.243857	0.0542405	2
T_43195_c2_g1	GRAS	gi|356565081|ref|XP_003550773.1| PREDICTED: probable WRKY transcription factor 61 [Glycine max] 5.0e-125	GO:0003700, DNA binding transcription factor activity;GO:0005634, nucleus;GO:0006351, transcription, DNA-templated;GO:0006952, defense response;GO:0043565, sequence-specific DNA binding	-	0.0600434	0.458662	0.631151	0.202769	-0.0217632	0.600199	-0.0597195	0.200105	0.146433	-0.425268	0.744584	-0.494002	-0.350544	0.461527	-0.00402414	0.562927	-0.27452	0.158753	0.537483	0.672752	0.352921	0.427604	0.346577	0.45325	0.769637	-0.2745	0.593532	-0.0772177	-0.290043	-0.0631706	-0.334055	0.0273792	2
T_44858_c1_g1	C2H2	gi|950997743|ref|XP_014506090.1| PREDICTED: heat shock factor protein HSF24-like [Vigna radiata var. radiata] 3.3e-32	GO:0003700, DNA binding transcription factor activity;GO:0005634, nucleus;GO:0006351, transcription, DNA-templated;GO:0043565, sequence-specific DNA binding	-	0.0526651	0.295622	0.316068	-0.122746	0.149467	-0.00453868	0.171248	0.456831	0.548201	-0.552519	0.326626	-0.25402	-0.153427	0.41952	0.512445	0.0061856	-0.411684	-0.325132	0.17166	0.32669	0.268038	0.527279	0.395737	0.92745	0.700639	-0.0506098	-0.0389613	-0.364538	0.0485376	0.305179	0.183408	-0.184368	2
T_42501_c3_g1	bHLH	gi|1012359755|gb|KYP70939.1| Splicing factor U2af small subunit B [Cajanus cajan] 4.2e-73	GO:0000166, nucleotide binding;GO:0000398, mRNA splicing, via spliceosome;GO:0003677, DNA binding;GO:0003723, RNA binding;GO:0005634, nucleus;GO:0005681, spliceosomal complex;GO:0016607, nuclear speck;GO:0046872, metal ion binding;GO:0048573, photoperiodism, flowering;GO:0089701, U2AF	-	-0.171108	-0.660009	-0.678833	-0.181933	-0.000252712	-0.41899	-0.0661239	-0.424241	-0.323972	0.471613	-0.637039	0.271465	0.283989	-0.623959	-0.323421	-0.323666	0.451594	0.131894	-0.43569	-0.539457	-0.349586	-0.746109	-0.00708586	-0.736421	-0.578721	0.320346	-0.373192	-0.0362462	-0.0542012	-0.433845	0.0687035	-0.0471803	2
T_36088_c0_g1	AP2/ERF->AP2/ERF-ERF	gi|955352413|ref|XP_014619897.1| PREDICTED: zinc finger CCCH domain-containing protein 46-like isoform X2 [Glycine max] 7.8e-111	GO:0003677, DNA binding;GO:0046872, metal ion binding	K14321-ko03013 RNA transport	-0.409132	-0.740756	-0.650714	-0.399415	-0.0258266	-0.656403	0.285477	-0.153881	0.173796	-0.176726	-0.582597	0.215046	0.317337	-0.60256	0.162173	-0.458353	0.0849136	-0.0284148	-0.473123	-0.592342	-0.251545	-0.513356	0.0875524	-0.241044	-0.31295	0.394384	-0.71179	-0.456125	-0.270403	-0.495401	0.439796	-0.31143	2
T_24616_c0_g1	NF-Y->NF-YB	gi|734414451|gb|KHN37282.1| hypothetical protein glysoja_013497 [Glycine soja] 3.6e-31	GO:0046872, metal ion binding	-	-0.308278	-0.589542	-0.72089	-0.310358	-0.269677	-0.472474	-0.0454322	-0.263968	-0.334043	0.65636	-0.690222	0.481434	0.177375	-0.550151	-0.213767	-0.455288	0.417228	-0.0163532	-0.524688	-0.60609	-0.229587	-0.653375	-0.0958533	-0.57251	-0.718599	0.548129	-0.553554	-0.179802	0.00271308	-0.239827	-0.041572	-0.100546	2
T_39153_c1_g3	GARP->GARP-ARR-B	gi|947051671|gb|KRH01200.1| hypothetical protein GLYMA_18G261300 [Glycine max] 8.2e-204	GO:0003677, DNA binding;GO:0003700, DNA binding transcription factor activity;GO:0005634, nucleus;GO:0006351, transcription, DNA-templated;GO:0006355, regulation of transcription, DNA-templated	-	-0.0234774	-0.574847	-0.608455	-0.093693	0.171667	-0.552607	0.209746	-0.226813	0.0473022	0.27787	-0.718821	0.413389	0.355695	-0.602885	0.0748526	-0.514716	0.154926	-0.0927154	-0.401599	-0.729536	-0.410648	-0.288943	-0.0261441	-0.469911	-0.469268	0.258176	-0.507147	0.0533259	0.274803	-0.250232	0.523932	-0.074005	2
T_42414_c6_g3	NAC	gi|356576289|ref|XP_003556265.1| PREDICTED: AP2/ERF and B3 domain-containing transcription repressor RAV2-like [Glycine max] 6.7e-167	GO:0003677, DNA binding;GO:0003700, DNA binding transcription factor activity;GO:0005634, nucleus;GO:0006351, transcription, DNA-templated;GO:0009873, ethylene-activated signaling pathway;GO:0045892, negative regulation of transcription, DNA-templated	-	0.139968	0.314805	0.368913	0.0975213	0.215362	0.15839	0.0670324	0.353248	0.484391	-0.466559	0.41181	-0.403338	-0.163811	0.381411	0.242942	0.106204	-0.321923	-0.084673	0.302763	0.420601	0.163924	0.511368	0.585458	0.826064	0.84241	-0.0909117	0.206828	-0.329067	-0.1338	0.219746	-0.0416211	0.0143864	2
T_38934_c0_g1	GARP->GARP-G2-like	gi|356555763|ref|XP_003546199.1| PREDICTED: nuclear transcription factor Y subunit B-3 [Glycine max] 8.1e-58	GO:0003700, DNA binding transcription factor activity;GO:0005634, nucleus;GO:0006351, transcription, DNA-templated;GO:0006355, regulation of transcription, DNA-templated;GO:0043565, sequence-specific DNA binding	-	-0.141294	-0.643045	-0.658527	-0.49054	0.140542	-0.744881	0.104045	-0.253947	0.288583	-0.041609	-0.680067	0.383803	0.0923689	-0.43738	0.317021	-0.609034	0.0982359	-0.273024	-0.43402	-0.675918	-0.337362	-0.297503	0.102184	-0.0840828	-0.239279	0.420907	-0.798426	-0.342854	0.138772	-0.0763029	0.495014	-0.436778	2
T_39880_c5_g1	C2H2	gi|1012056068|ref|XP_015953912.1| PREDICTED: NAC domain-containing protein 72-like isoform X1 [Arachis duranensis] 1.0e-40	GO:0003677, DNA binding;GO:0003700, DNA binding transcription factor activity;GO:0005634, nucleus;GO:0006351, transcription, DNA-templated;GO:0006355, regulation of transcription, DNA-templated;GO:0009611, response to wounding;GO:0009788, negative regulation of abscisic acid-activated signaling pathway	-	0.0335123	0.566155	0.624336	0.0419156	0.0521598	0.250278	0.206454	0.482084	0.502985	-0.796325	0.661159	-0.278663	-0.209961	0.579453	0.593803	0.318819	-0.618218	-0.319877	0.291458	0.505517	0.375488	0.616701	-0.00999258	0.742527	0.614427	-0.305537	0.240801	0.011859	-0.00120846	0.319894	0.029831	-0.236987	2
T_37276_c0_g1	bZIP	gi|593265640|ref|XP_007134998.1| hypothetical protein PHAVU_010G093300g [Phaseolus vulgaris] 5.9e-37	GO:0005634, nucleus;GO:0006355, regulation of transcription, DNA-templated;GO:0008270, zinc ion binding	-	-0.140745	-0.55564	-0.699567	-0.234821	-0.10022	-0.661892	0.0533212	-0.187814	-0.162345	0.442658	-0.723613	0.505266	0.359093	-0.611974	-0.100317	-0.590291	0.351305	-0.133171	-0.62531	-0.681468	-0.513403	-0.578195	-0.328309	-0.601348	-0.84148	0.432499	-0.558097	-0.00284853	-0.0228033	-0.0769831	0.195673	-0.0711352	2
T_38916_c0_g1	AP2/ERF->AP2/ERF-ERF	gi|356565266|ref|XP_003550863.1| PREDICTED: scarecrow-like protein 21 [Glycine max] 4.0e-249	GO:0000989, transcription factor activity, transcription factor binding;GO:0003700, DNA binding transcription factor activity;GO:0005634, nucleus;GO:0006351, transcription, DNA-templated;GO:0006355, regulation of transcription, DNA-templated;GO:0009739, response to gibberellin;GO:0009740, gibberellic acid mediated signaling pathway;GO:0009908, flower development;GO:0009938, negative regulation of…	-	-0.0851305	0.164462	0.15621	0.305528	-0.345668	-0.109538	0.833349	0.645989	0.735272	-0.517126	0.29766	-0.48552	0.194741	-0.318388	0.299143	-0.143862	-0.559154	-0.413092	-0.362593	-0.150792	0.205706	0.0752861	0.217214	0.0406842	0.283931	-0.316886	0.0621839	-0.0889491	-0.509121	0.106138	-0.266096	-0.254241	2
T_46027_c0_g3	Tify	gi|356525519|ref|XP_003531372.1| PREDICTED: transcription factor TGA1-like isoform X2 [Glycine max] 2.2e-191	GO:0003700, DNA binding transcription factor activity;GO:0005634, nucleus;GO:0006351, transcription, DNA-templated;GO:0042742, defense response to bacterium;GO:0043565, sequence-specific DNA binding;GO:0044212, transcription regulatory region DNA binding	K14431-ko04075 Plant hormone signal transduction	-0.262494	-0.635623	-0.579065	-0.55291	0.153705	-0.770626	0.0781838	-0.0935054	0.229376	-0.23369	-0.571941	0.183437	0.300074	-0.468565	0.169515	-0.519236	0.144028	-0.227049	-0.449852	-0.483312	-0.354186	-0.459283	0.0989581	-0.0462263	-0.221029	0.435502	-0.721184	-0.45166	-0.0867653	-0.239202	0.532579	-0.31944	2
T_42109_c1_g6	AP2/ERF->AP2/ERF-ERF	gi|187940307|gb|ACD39384.1| NAC domain protein, partial [Glycine max] 4.2e-35	GO:0003677, DNA binding;GO:0003700, DNA binding transcription factor activity;GO:0005634, nucleus;GO:0006351, transcription, DNA-templated;GO:0006355, regulation of transcription, DNA-templated;GO:0009611, response to wounding;GO:0009788, negative regulation of abscisic acid-activated signaling pathway	-	-0.0907928	0.248171	0.313706	-0.0114668	0.0905116	0.164424	0.26036	0.383442	0.61245	-0.582778	0.40359	-0.237568	-0.315644	0.361499	0.5163	0.146551	-0.554434	-0.298554	0.255387	0.280269	0.444494	0.44061	0.584122	0.830374	0.856987	-0.124694	-0.0197175	-0.401148	0.114504	0.0725361	0.0543257	-0.325725	2
T_38716_c1_g2	WRKY	gi|734312808|gb|KHN00986.1| Ethylene-responsive transcription factor ERF106 [Glycine soja] 1.1e-92	GO:0003677, DNA binding;GO:0003700, DNA binding transcription factor activity;GO:0005634, nucleus;GO:0006351, transcription, DNA-templated;GO:0006952, defense response;GO:0009409, response to cold;GO:0009873, ethylene-activated signaling pathway;GO:0010200, response to chitin	-	0.372181	0.332492	0.417543	-0.0549193	0.382865	0.159424	-0.156413	0.0487711	0.291634	-0.431026	0.318675	-0.127493	-0.362733	0.560195	0.330313	0.18027	-0.148632	-0.0768227	0.368963	0.444796	0.111947	0.613683	0.247785	0.764596	0.706908	-0.116097	0.172408	-0.098475	0.227931	0.390558	0.342895	-0.0770841	2
T_45198_c1_g1	WRKY	gi|359806120|ref|NP_001241446.1| uncharacterized protein LOC100780763 [Glycine max] 2.2e-130	GO:0003677, DNA binding;GO:0003700, DNA binding transcription factor activity;GO:0005634, nucleus;GO:0005737, cytoplasm;GO:0005886, plasma membrane;GO:0006351, transcription, DNA-templated;GO:0008219, cell death;GO:0009723, response to ethylene;GO:0009735, response to cytokinin;GO:0009753, response to jasmonic acid;GO:0009873, ethylene-activated signaling pathway;GO:0010286, heat acclimation;GO:0…	-	0.128308	0.105661	0.138444	-0.107163	0.197766	-0.165388	0.232407	0.357795	0.666497	-0.559236	0.155485	-0.224447	-0.146616	0.19591	0.427987	-0.170306	-0.386441	-0.33717	0.0458359	0.111232	0.133832	0.409458	0.552656	0.813729	0.717458	-0.036661	-0.148767	-0.448997	0.0272951	0.29523	0.245534	-0.230232	2
T_42196_c0_g5	bHLH	gi|922394058|ref|XP_013465434.1| transcription factor bHLH122-like protein [Medicago truncatula] 5.9e-15	GO:0001046, core promoter sequence-specific DNA binding;GO:0001228, transcriptional activator activity, RNA polymerase II transcription regulatory region sequence-specific DNA binding;GO:0003700, DNA binding transcription factor activity;GO:0005634, nucleus;GO:0006355, regulation of transcription, DNA-templated;GO:0006366, transcription by RNA polymerase II;GO:0010119, regulation of stomatal move…	-	-0.368658	-0.619859	-0.637449	-0.346364	-0.284008	-0.636613	0.517782	-0.031566	0.421902	-0.0590873	-0.572866	0.326299	0.0438361	-0.66026	0.344085	-0.569086	-0.159831	-0.405925	-0.610235	-0.831157	-0.00465489	-0.408888	0.151801	-0.281062	-0.257392	0.311327	-0.802487	-0.395044	0.0249781	-0.212858	0.253958	-0.607625	2
T_42407_c2_g5	NAC	gi|918463797|gb|ALA09243.1| NAC transcription factor [Glycine max] 2.0e-52	GO:0003677, DNA binding;GO:0003700, DNA binding transcription factor activity;GO:0005634, nucleus;GO:0006351, transcription, DNA-templated;GO:0006355, regulation of transcription, DNA-templated;GO:0009611, response to wounding;GO:0009788, negative regulation of abscisic acid-activated signaling pathway	-	-0.0310496	0.214528	0.316755	-0.17328	-0.0351868	0.00848102	0.357192	0.398947	0.573022	-0.78921	0.463672	-0.296962	-0.183595	0.376736	0.670328	0.139266	-0.603971	-0.299651	0.137932	0.291621	0.387068	0.395005	0.134776	0.715014	0.559711	-0.161855	-0.0643342	-0.268115	-0.121743	0.140013	0.0970858	-0.431221	2
T_42407_c2_g2	NAC	gi|959092818|ref|NP_001304649.1| NAC domain-containing protein 2 [Glycine max] 1.3e-74	GO:0003677, DNA binding;GO:0005634, nucleus;GO:0006351, transcription, DNA-templated;GO:0006355, regulation of transcription, DNA-templated;GO:0008361, regulation of cell size;GO:0009416, response to light stimulus;GO:0009611, response to wounding;GO:0009620, response to fungus;GO:0009744, response to sucrose;GO:0009751, response to salicylic acid;GO:0009753, response to jasmonic acid;GO:0043424,…	-	-0.0146809	0.0471508	0.193997	-0.200715	0.210814	-0.0200571	0.167077	0.167174	0.540659	-0.644683	0.271444	-0.294788	-0.245813	0.31552	0.527141	0.0842706	-0.419024	-0.146476	0.228385	0.24744	0.264256	0.367314	0.51662	0.803379	0.790858	0.00375458	-0.120806	-0.466604	-0.00559506	0.0224515	0.220913	-0.341458	2
T_40116_c2_g1	C2C2->C2C2-GATA	gi|593267499|ref|XP_007135927.1| hypothetical protein PHAVU_009G003800g [Phaseolus vulgaris] 2.2e-87	GO:0000977, RNA polymerase II regulatory region sequence-specific DNA binding;GO:0001085, RNA polymerase II transcription factor binding;GO:0001228, transcriptional activator activity, RNA polymerase II transcription regulatory region sequence-specific DNA binding;GO:0003682, chromatin binding;GO:0003700, DNA binding transcription factor activity;GO:0005634, nucleus;GO:0005667, transcription fact…	-	0.0124613	0.0831889	0.11251	-0.182515	0.0795598	-0.229962	0.368784	0.486541	0.753927	-0.615815	0.156285	-0.25862	-0.0815007	0.121076	0.539417	-0.228005	-0.453885	-0.461683	-0.0453246	0.043625	0.185455	0.407345	0.546634	0.79481	0.678614	-0.029137	-0.21728	-0.488996	-0.068557	0.231878	0.234169	-0.337464	2
T_41242_c2_g2	SBP	gi|356502645|ref|XP_003520128.1| PREDICTED: squamosa promoter-binding-like protein 6 isoform X2 [Glycine max] 1.0e-248	GO:0003677, DNA binding;GO:0003700, DNA binding transcription factor activity;GO:0005634, nucleus;GO:0006351, transcription, DNA-templated;GO:0006355, regulation of transcription, DNA-templated;GO:0010468, regulation of gene expression;GO:0042742, defense response to bacterium;GO:0046872, metal ion binding	-	-0.106146	-0.292383	-0.381348	0.18577	0.224897	-0.0415173	-0.310243	-0.409141	-0.668614	0.59842	-0.487422	0.288924	0.466984	-0.346443	-0.594426	-0.0414123	0.563819	0.360817	-0.131794	-0.251779	-0.378093	-0.630943	-0.397634	-0.787388	-0.782423	-0.0610314	-0.0347125	0.383917	0.205052	-0.370291	0.117988	0.477486	2
T_45901_c2_g1	C2C2->C2C2-Dof	gi|356521327|ref|XP_003529308.1| PREDICTED: dof zinc finger protein DOF3.2-like [Glycine max] 3.2e-101	GO:0003677, DNA binding;GO:0005634, nucleus;GO:0006351, transcription, DNA-templated;GO:0006355, regulation of transcription, DNA-templated;GO:0046872, metal ion binding	-	-0.0915744	-0.74459	-0.648941	-0.510042	0.195534	-0.77469	0.0237784	-0.283878	0.230974	-0.128176	-0.656526	0.176572	0.235007	-0.569495	0.0496311	-0.570199	0.261892	-0.0935762	-0.389677	-0.597577	-0.470465	-0.419998	0.1886	-0.201558	-0.187932	0.449279	-0.691559	-0.396888	-0.117767	-0.253367	0.524304	-0.289289	2
T_46135_c1_g5	AP2/ERF->AP2/ERF-ERF	gi|571487156|ref|XP_003538752.2| PREDICTED: ethylene-responsive transcription factor 2-like [Glycine max] 2.4e-105	GO:0001944, vasculature development;GO:0003677, DNA binding;GO:0003700, DNA binding transcription factor activity;GO:0005634, nucleus;GO:0006351, transcription, DNA-templated;GO:0006952, defense response;GO:0009873, ethylene-activated signaling pathway;GO:0010200, response to chitin;GO:0051301, cell division	-	0.232747	0.0398895	0.0598244	-0.0771925	0.0428188	-0.296239	0.432502	0.499879	0.718445	-0.506443	0.135291	-0.358126	-0.0100321	0.0190593	0.383397	-0.307619	-0.387902	-0.363446	-0.151961	0.0386863	0.0733027	0.346323	0.575707	0.723901	0.632066	-0.0111754	-0.121449	-0.483688	-0.228611	0.339557	0.150779	-0.209982	2
T_44347_c1_g9	C2C2->C2C2-Dof	gi|908212362|tpg|DAA64924.1| TPA_inf: dof protein [Cajanus cajan] 2.9e-93	GO:0003677, DNA binding;GO:0003700, DNA binding transcription factor activity;GO:0005634, nucleus;GO:0006351, transcription, DNA-templated;GO:0006355, regulation of transcription, DNA-templated;GO:0009409, response to cold;GO:0009416, response to light stimulus;GO:0009845, seed germination;GO:0046872, metal ion binding	-	0.117759	-0.504613	-0.537229	-0.217439	0.528187	-0.674958	-0.2734	-0.309983	-0.149502	0.164338	-0.707028	0.305294	0.571563	-0.382294	-0.207121	-0.472046	0.566954	0.104316	-0.273365	-0.410276	-0.740839	-0.428049	-0.281642	-0.343196	-0.574117	0.341248	-0.477742	0.0938157	0.147989	-0.0643612	0.650851	0.257855	2
T_43250_c4_g7	AP2/ERF->AP2/ERF-ERF	gi|734402185|gb|KHN31935.1| Ethylene-responsive transcription factor 5 [Glycine soja] 2.9e-86	GO:0003677, DNA binding;GO:0003700, DNA binding transcription factor activity;GO:0005634, nucleus;GO:0006351, transcription, DNA-templated;GO:0006952, defense response;GO:0009873, ethylene-activated signaling pathway	-	0.0567034	-0.581789	-0.607072	-0.199011	0.128584	-0.807053	0.446042	0.118257	0.539992	-0.116499	-0.579754	0.0240531	0.320962	-0.560486	0.21555	-0.734308	-0.0157901	-0.224833	-0.554072	-0.592281	-0.363278	-0.231475	0.431279	0.160901	0.0116445	0.360666	-0.657657	-0.543172	-0.174201	0.046738	0.430304	-0.182752	2
T_42093_c0_g6	AP2/ERF->AP2/ERF-ERF	gi|356552847|ref|XP_003544774.1| PREDICTED: ethylene-responsive transcription factor 3 [Glycine max] 5.0e-53	GO:0003677, DNA binding;GO:0003700, DNA binding transcription factor activity;GO:0005634, nucleus;GO:0006351, transcription, DNA-templated;GO:0006952, defense response;GO:0009873, ethylene-activated signaling pathway	-	0.11384	0.0159812	0.000173617	-0.120943	0.0745426	-0.336969	0.386792	0.461272	0.735984	-0.519594	0.0519006	-0.210913	-0.0332223	0.0433029	0.443488	-0.356651	-0.409595	-0.403499	-0.147219	-0.0393274	0.065144	0.32728	0.51661	0.770057	0.564157	0.0205677	-0.26956	-0.525886	-0.108606	0.350099	0.2107	-0.241004	2
T_43253_c0_g1	MYB->MYB	gi|571496493|ref|XP_003543825.2| PREDICTED: transcription factor GAMYB-like isoform X1 [Glycine max] 1.4e-252	GO:0003677, DNA binding;GO:0005634, nucleus;GO:0006351, transcription, DNA-templated;GO:0006355, regulation of transcription, DNA-templated;GO:0009908, flower development;GO:0030154, cell differentiation	-	-0.0333882	-0.48259	-0.550817	0.0154022	0.0776244	-0.648426	0.126469	-0.0794421	-0.00571655	0.19647	-0.626381	0.0848343	0.659035	-0.744827	-0.386269	-0.526088	0.499778	0.02907	-0.58745	-0.591587	-0.582559	-0.660419	-0.248922	-0.715174	-0.669769	0.213526	-0.406293	0.0866632	-0.279534	-0.0957571	0.232588	0.208585	2
T_18526_c0_g1	HB->HB-WOX	gi|356540542|ref|XP_003538747.1| PREDICTED: transcription factor MYB114-like [Glycine max] 1.2e-30	GO:0003677, DNA binding;GO:0005634, nucleus;GO:0006351, transcription, DNA-templated;GO:0007275, multicellular organism development;GO:0010026, trichome differentiation;GO:0045893, positive regulation of transcription, DNA-templated	-	-0.137559	-0.822849	-0.714453	-0.646138	-0.151511	-0.681371	0.0182869	-0.515818	-0.0276255	0.0964351	-0.674407	0.00557745	0.032005	-0.606413	-0.0642989	-0.550214	0.186912	0.0489925	-0.452988	-0.661131	-0.292134	-0.524825	0.135905	-0.296631	-0.325932	0.382823	-0.659063	-0.554165	-0.224418	-0.206899	0.166853	-0.358292	2
T_42188_c2_g5	C2H2	gi|593269140|ref|XP_007136747.1| hypothetical protein PHAVU_009G070800g [Phaseolus vulgaris] 8.5e-94	GO:0003700, DNA binding transcription factor activity;GO:0005634, nucleus;GO:0006351, transcription, DNA-templated;GO:0006979, response to oxidative stress;GO:0009409, response to cold;GO:0009414, response to water deprivation;GO:0009611, response to wounding;GO:0009644, response to high light intensity;GO:0009651, response to salt stress;GO:0009737, response to abscisic acid;GO:0010117, photopro…	-	0.0625629	-0.00477021	0.00094207	-0.153725	0.0736349	-0.309818	0.372945	0.433564	0.749158	-0.485995	0.0593864	-0.253735	-0.081221	0.0135308	0.459969	-0.331957	-0.437494	-0.437647	-0.12315	-0.0496108	0.085929	0.326503	0.644601	0.758302	0.655275	0.0590183	-0.244089	-0.557932	-0.08089	0.267546	0.156039	-0.306694	2
T_42188_c2_g2	C2H2	gi|207113465|gb|ACI23460.1| putative Cys2-His2 type zinc finger protein [Glycine soja] 4.4e-92	GO:0003700, DNA binding transcription factor activity;GO:0005634, nucleus;GO:0006351, transcription, DNA-templated;GO:0006979, response to oxidative stress;GO:0009409, response to cold;GO:0009414, response to water deprivation;GO:0009611, response to wounding;GO:0009644, response to high light intensity;GO:0009651, response to salt stress;GO:0009737, response to abscisic acid;GO:0010117, photopro…	-	0.0330496	-0.0657107	-0.0572338	-0.206716	-0.0270563	-0.341113	0.425319	0.426205	0.759339	-0.466664	0.0306654	-0.249546	-0.118507	-0.0373141	0.474363	-0.376782	-0.464798	-0.448834	-0.175624	-0.112128	0.12866	0.300108	0.67555	0.741698	0.63579	0.088284	-0.29724	-0.631902	-0.133078	0.251583	0.108928	-0.372176	2
T_42214_c5_g3	bHLH	gi|571503920|ref|XP_006595181.1| PREDICTED: transcription factor bHLH25-like [Glycine max] 9.5e-90	GO:0003677, DNA binding;GO:0003700, DNA binding transcription factor activity;GO:0005634, nucleus;GO:0006351, transcription, DNA-templated;GO:0006355, regulation of transcription, DNA-templated	-	-0.14043	-0.712559	-0.727598	-0.347828	-0.269098	-0.357906	0.140607	-0.514454	-0.244999	0.402772	-0.66275	0.502853	-0.166811	-0.421171	0.00392398	-0.365277	0.133644	0.10589	-0.403095	-0.65566	0.0883851	-0.510404	-0.0211226	-0.370401	-0.496741	0.244266	-0.661556	-0.334824	0.223023	-0.235214	0.214791	-0.337532	2
T_44588_c1_g1	C2H2	gi|734438186|gb|KHN49000.1| Zinc finger protein ZAT11 [Glycine soja] 4.6e-79	GO:0003676, nucleic acid binding;GO:0003700, DNA binding transcription factor activity;GO:0005634, nucleus;GO:0006351, transcription, DNA-templated;GO:0006355, regulation of transcription, DNA-templated;GO:0010200, response to chitin;GO:0043565, sequence-specific DNA binding;GO:0044212, transcription regulatory region DNA binding;GO:0046872, metal ion binding;GO:0071289, cellular response to nick…	-	0.0304224	0.0105785	0.141753	-0.289889	0.19627	-0.0588561	-0.00251928	0.108367	0.459168	-0.59481	0.229213	-0.285821	-0.267223	0.343874	0.378018	0.0117827	-0.307748	-0.0719918	0.2616	0.266803	0.170494	0.350412	0.507516	0.845464	0.732232	0.0451907	-0.140994	-0.555631	-0.0976064	0.100176	0.153854	-0.252085	2
T_40253_c0_g1	WRKY	gi|356555684|ref|XP_003546160.1| PREDICTED: probable WRKY transcription factor 31 [Glycine max] 1.0e-129	GO:0003700, DNA binding transcription factor activity;GO:0005634, nucleus;GO:0006351, transcription, DNA-templated;GO:0009873, ethylene-activated signaling pathway;GO:0010200, response to chitin;GO:0016036, cellular response to phosphate starvation;GO:0043565, sequence-specific DNA binding;GO:0044212, transcription regulatory region DNA binding;GO:0045892, negative regulation of transcription, DN…	-	-0.125906	0.307635	0.36507	-0.0473148	0.040218	0.16949	0.249365	0.423851	0.658973	-0.557365	0.422062	-0.255594	-0.320435	0.344893	0.59397	0.103311	-0.618071	-0.389665	0.267682	0.239599	0.382847	0.610942	0.616415	0.819045	0.883693	-0.0776782	0.0555772	-0.345332	0.0646352	0.0886613	-0.0346166	-0.361288	2
T_40253_c0_g3	WRKY	gi|571467949|ref|XP_003528693.2| PREDICTED: WRKY transcription factor 6 [Glycine max] 2.5e-73	GO:0003700, DNA binding transcription factor activity;GO:0005634, nucleus;GO:0006351, transcription, DNA-templated;GO:0009873, ethylene-activated signaling pathway;GO:0010200, response to chitin;GO:0016036, cellular response to phosphate starvation;GO:0043565, sequence-specific DNA binding;GO:0044212, transcription regulatory region DNA binding;GO:0045892, negative regulation of transcription, DN…	-	0.0893862	0.416206	0.482565	-0.0391108	-0.0732438	0.318343	0.109424	0.351556	0.509526	-0.487109	0.564213	-0.435085	-0.49611	0.463039	0.333578	0.199143	-0.489526	-0.263019	0.333203	0.425927	0.465657	0.594033	0.58313	0.83849	0.926574	-0.237164	0.236345	-0.375181	-0.0562426	0.298178	-0.228025	-0.267478	2
T_36751_c0_g1	C2H2	gi|359807584|ref|NP_001241413.1| uncharacterized protein LOC100816598 [Glycine max] 3.6e-56	GO:0003700, DNA binding transcription factor activity;GO:0005634, nucleus;GO:0006351, transcription, DNA-templated;GO:0006355, regulation of transcription, DNA-templated;GO:0010200, response to chitin;GO:0043565, sequence-specific DNA binding;GO:0044212, transcription regulatory region DNA binding;GO:0046872, metal ion binding;GO:0071289, cellular response to nickel ion;GO:2000280, regulation of …	-	0.0759507	0.40785	0.543586	-0.0523693	0.352603	0.260761	-0.216494	0.0557202	0.182482	-0.57723	0.529595	-0.343257	-0.190968	0.717009	0.406135	0.416134	-0.21572	0.179704	0.550941	0.66746	0.0991428	0.560411	-0.00725441	0.807955	0.610156	-0.0154466	0.231994	-0.0860279	-0.0924812	0.186643	0.0918707	0.0320131	2
T_43064_c2_g3	C3H	gi|955380707|ref|XP_014625508.1| PREDICTED: PHD finger protein ALFIN-LIKE 4-like [Glycine max] 1.3e-30	GO:0003677, DNA binding;GO:0003714, transcription corepressor activity;GO:0005634, nucleus;GO:0006351, transcription, DNA-templated;GO:0006355, regulation of transcription, DNA-templated;GO:0008270, zinc ion binding;GO:0009414, response to water deprivation;GO:0009651, response to salt stress	-	-0.0712886	-0.65917	-0.690769	-0.438215	-0.173316	-0.764658	0.163208	-0.0976063	0.234153	0.0489027	-0.575812	0.172165	0.164158	-0.500636	0.0175075	-0.623093	0.224226	-0.0708355	-0.538353	-0.581585	-0.199531	-0.47131	0.176772	-0.130771	-0.256579	0.603313	-0.750264	-0.489492	-0.296586	0.0306501	0.0789326	-0.273416	2
T_39526_c3_g5	MYB->MYB-related	gi|571455391|ref|XP_006580078.1| PREDICTED: zinc finger CCCH domain-containing protein 17-like [Glycine max] 4.2e-310	GO:0003677, DNA binding;GO:0046872, metal ion binding	-	0.193744	0.470066	0.269365	0.730557	0.39672	0.183257	0.034054	0.303857	-0.114666	0.346356	0.0149507	0.105257	0.515167	0.0193948	-0.195147	0.120623	0.281571	-0.0193464	-0.0222082	0.132709	-0.257526	0.0708002	-0.346044	-0.29763	-0.249085	-0.194495	0.376098	0.759796	0.336654	0.192944	0.173194	0.61787	2
T_42109_c1_g4	AP2/ERF->AP2/ERF-ERF	gi|955471896|ref|NP_001304273.1| NAC domain-containing protein 72 [Glycine max] 1.4e-167	GO:0003677, DNA binding;GO:0005634, nucleus;GO:0006351, transcription, DNA-templated;GO:0006355, regulation of transcription, DNA-templated	-	-0.0876201	-0.522549	-0.516368	-0.517925	-0.230401	-0.567314	0.365196	-0.104417	0.364307	-0.133798	-0.429003	0.37212	-0.268564	-0.289068	0.521257	-0.494096	-0.249468	-0.388559	-0.470145	-0.565018	0.0934231	-0.120744	0.203798	0.146108	-0.030051	0.340717	-0.709471	-0.507826	0.124562	0.0552556	0.327063	-0.702307	2
T_40103_c0_g1	TCP	gi|356498729|ref|XP_003518202.1| PREDICTED: transcription repressor OFP15-like [Glycine max] 1.6e-77	GO:0005634, nucleus;GO:0006351, transcription, DNA-templated;GO:0045892, negative regulation of transcription, DNA-templated	-	-0.256386	-0.0665455	-0.197615	0.210172	-0.190653	0.00563552	-0.0677879	-0.167786	-0.494032	0.512966	-0.286803	0.349459	0.340586	-0.286258	-0.292787	-0.0216028	0.264153	0.201388	-0.241911	-0.279471	-0.165774	-0.33322	-0.526232	-0.74399	-0.758341	0.157891	0.0224572	0.451693	-0.00470943	-0.169062	-0.2149	0.290969	2
T_37234_c0_g1	bZIP	gi|571538819|ref|XP_006601212.1| PREDICTED: probable WRKY transcription factor 40 isoform X1 [Glycine max] 4.0e-39	GO:0002237, response to molecule of bacterial origin;GO:0003700, DNA binding transcription factor activity;GO:0005634, nucleus;GO:0006351, transcription, DNA-templated;GO:0009611, response to wounding;GO:0009751, response to salicylic acid;GO:0010200, response to chitin;GO:0031347, regulation of defense response;GO:0042742, defense response to bacterium;GO:0043565, sequence-specific DNA binding;G…	-	-0.236737	-0.450579	-0.405309	-0.417305	-0.114532	-0.390103	0.317059	0.156533	0.535494	-0.175506	-0.301382	-0.0554057	-0.111704	-0.357857	0.264719	-0.45781	-0.222363	-0.401251	-0.243727	-0.427342	0.167095	-0.0466853	0.840081	0.321307	0.435098	0.189783	-0.522685	-0.723471	-0.0228852	-0.223505	0.154114	-0.490394	2
T_40980_c3_g4	HB->HB-BELL	gi|571448637|ref|XP_006577910.1| PREDICTED: BEL1-like homeodomain protein 6 [Glycine max] 0.0e+00	GO:0003677, DNA binding;GO:0003700, DNA binding transcription factor activity;GO:0005634, nucleus;GO:0006351, transcription, DNA-templated;GO:0006355, regulation of transcription, DNA-templated;GO:0044212, transcription regulatory region DNA binding	-	0.262526	-0.443128	-0.523795	0.123419	0.367613	-0.548184	-0.0241926	-0.330993	-0.246723	0.511962	-0.703306	0.0754084	0.657045	-0.550393	-0.320138	-0.452581	0.629912	0.267427	-0.439078	-0.47111	-0.713638	-0.437055	-0.239486	-0.622667	-0.631662	0.247931	-0.222557	0.277427	-0.0606017	-0.00638952	0.34924	0.409998	2
T_40821_c2_g2	FAR1	gi|1012361883|gb|KYP73066.1| Zinc finger CCCH domain-containing protein 29 [Cajanus cajan] 1.5e-213	GO:0003677, DNA binding;GO:0003700, DNA binding transcription factor activity;GO:0005634, nucleus;GO:0006355, regulation of transcription, DNA-templated;GO:0009409, response to cold;GO:0010200, response to chitin;GO:0046872, metal ion binding;GO:0050832, defense response to fungus	-	0.104676	0.166434	0.104163	0.0429392	0.142546	-0.206935	0.367764	0.543164	0.733486	-0.380209	0.0882853	-0.185333	-0.0157988	0.0745782	0.411691	-0.28256	-0.366092	-0.460878	-0.0919883	0.00519336	0.109057	0.404196	0.596166	0.737087	0.646667	0.0097094	-0.151592	-0.377083	0.0574518	0.357389	0.181272	-0.151267	2
T_43559_c2_g1	MYB->MYB-related	gi|571511383|ref|XP_006596412.1| PREDICTED: protein NTM1-like 9 [Glycine max] 3.4e-202	GO:0003677, DNA binding;GO:0005516, calmodulin binding;GO:0005634, nucleus;GO:0005789, endoplasmic reticulum membrane;GO:0005886, plasma membrane;GO:0006351, transcription, DNA-templated;GO:0006355, regulation of transcription, DNA-templated;GO:0016021, integral component of membrane;GO:0045892, negative regulation of transcription, DNA-templated;GO:0071470, cellular response to osmotic stress;GO…	-	0.185777	0.131486	0.214619	-0.171322	0.362055	0.0206702	-0.0399195	0.198283	0.378669	-0.450007	0.207849	-0.237392	-0.144119	0.422859	0.335371	0.0514664	-0.129225	-0.101766	0.311426	0.349815	0.182546	0.445886	0.471722	0.819508	0.712358	-0.0693953	-0.0425043	-0.329211	0.112061	0.140426	0.356886	-0.0869911	2
T_39956_c0_g1	MYB->MYB-related	gi|356547095|ref|XP_003541953.1| PREDICTED: probable WRKY transcription factor 31 [Glycine max] 3.7e-186	GO:0003700, DNA binding transcription factor activity;GO:0005634, nucleus;GO:0006351, transcription, DNA-templated;GO:0009873, ethylene-activated signaling pathway;GO:0010200, response to chitin;GO:0016021, integral component of membrane;GO:0016036, cellular response to phosphate starvation;GO:0043565, sequence-specific DNA binding;GO:0044212, transcription regulatory region DNA binding;GO:004589…	-	-0.138113	0.169897	0.299769	-0.230097	-0.0505289	0.360765	-0.0344264	0.021608	0.259478	-0.484083	0.383942	0.127968	-0.707031	0.480453	0.40534	0.339429	-0.466039	-0.204036	0.38388	0.295831	0.633867	0.375785	0.415562	0.639709	0.729365	-0.113363	-0.0220024	-0.349822	0.367249	-0.0494421	0.100646	-0.503379	2
T_33024_c0_g1	C2C2->C2C2-GATA	gi|356518150|ref|XP_003527745.1| PREDICTED: transcription factor RAX3 [Glycine max] 4.1e-115	GO:0003677, DNA binding;GO:0003700, DNA binding transcription factor activity;GO:0005634, nucleus;GO:0006351, transcription, DNA-templated;GO:0007275, multicellular organism development;GO:0009751, response to salicylic acid	-	0.224445	-0.224026	-0.284398	0.253058	0.415284	-0.389857	-0.108598	-0.272188	-0.242195	0.275606	-0.477885	0.292794	0.605916	-0.34054	-0.21561	-0.269604	0.411044	0.292669	-0.202351	-0.322688	-0.807628	-0.218767	-0.594124	-0.564676	-0.715077	0.196002	-0.0797332	0.502159	0.0166124	0.00971187	0.405783	0.478409	2
T_43358_c0_g2	Tify	gi|356549547|ref|XP_003543154.1| PREDICTED: ETHYLENE INSENSITIVE 3-like 1 protein [Glycine max] 0.0e+00	GO:0000976, transcription regulatory region sequence-specific DNA binding;GO:0001666, response to hypoxia;GO:0003700, DNA binding transcription factor activity;GO:0005634, nucleus;GO:0006351, transcription, DNA-templated;GO:0006355, regulation of transcription, DNA-templated;GO:0009723, response to ethylene;GO:0009873, ethylene-activated signaling pathway;GO:0010182, sugar mediated signaling path…	K14514-ko04075 Plant hormone signal transduction;ko04016 MAPK signaling pathway - plant	0.0536392	-0.161336	-0.18634	0.0844004	0.722831	-0.45799	-0.135865	-0.100113	0.129833	0.0483245	-0.46367	0.0735209	0.60424	-0.268853	0.0173598	-0.283857	0.43544	-0.016249	-0.112187	-0.240547	-0.718575	-0.0965056	-0.104753	-0.186415	-0.178189	0.247808	-0.220071	0.272411	0.192585	-0.0597706	0.641888	0.294292	2
T_39101_c0_g2	C2C2->C2C2-Dof	gi|356497218|ref|XP_003517459.1| PREDICTED: heat stress transcription factor B-2b [Glycine max] 6.1e-68	GO:0003700, DNA binding transcription factor activity;GO:0005634, nucleus;GO:0006351, transcription, DNA-templated;GO:0010200, response to chitin;GO:0043565, sequence-specific DNA binding;GO:0045892, negative regulation of transcription, DNA-templated	-	-0.184505	-0.414181	-0.443561	-0.404151	-0.179038	-0.609245	0.548547	0.325634	0.7004	-0.40758	-0.311977	0.0211857	0.00480454	-0.351223	0.469101	-0.609197	-0.333475	-0.545633	-0.501522	-0.489669	0.123267	-0.0881594	0.511236	0.392886	0.219849	0.110866	-0.688997	-0.701595	-0.150343	0.0524199	0.269844	-0.568698	2
T_43256_c0_g1	MYB->MYB	gi|951073944|ref|XP_014492319.1| PREDICTED: NAC transcription factor NAM-B2-like [Vigna radiata var. radiata] 1.9e-94	GO:0003677, DNA binding;GO:0003700, DNA binding transcription factor activity;GO:0005634, nucleus;GO:0006351, transcription, DNA-templated;GO:0006355, regulation of transcription, DNA-templated;GO:0010089, xylem development;GO:0043067, regulation of programmed cell death;GO:0048367, shoot system development	-	-0.157338	-0.541526	-0.522269	-0.338375	-0.424818	-0.731944	0.68213	0.136848	0.624689	-0.265787	-0.37294	-0.122968	0.0472576	-0.686673	0.332064	-0.640516	-0.295649	-0.418805	-0.767468	-0.689173	-0.0239385	-0.322006	0.362766	-0.0875463	0.014605	0.312034	-0.603281	-0.577632	-0.465396	0.0611049	-0.0439412	-0.625562	2
T_43752_c2_g2	bHLH	gi|356512703|ref|XP_003525056.1| PREDICTED: uncharacterized protein LOC100795519 [Glycine max] 8.7e-297	GO:0005634, nucleus;GO:0006351, transcription, DNA-templated;GO:0006355, regulation of transcription, DNA-templated	-	-0.0351072	-0.442186	-0.559408	-0.040816	0.230507	-0.547938	-0.0527747	-0.233319	-0.29964	0.548359	-0.715508	0.3147	0.605001	-0.485291	-0.167151	-0.435521	0.607183	0.143254	-0.463749	-0.4657	-0.602135	-0.45271	-0.29841	-0.551926	-0.725352	0.451001	-0.367855	0.18043	-0.0154994	-0.133158	0.354297	0.275899	2
T_44577_c0_g7	B3->B3-ARF	gi|951011820|ref|XP_014509886.1| PREDICTED: transcription factor MYC2-like [Vigna radiata var. radiata] 1.8e-164	GO:0003677, DNA binding;GO:0003700, DNA binding transcription factor activity;GO:0005634, nucleus;GO:0006351, transcription, DNA-templated;GO:0009269, response to desiccation;GO:0009611, response to wounding;GO:0009737, response to abscisic acid;GO:0009738, abscisic acid-activated signaling pathway;GO:0009753, response to jasmonic acid;GO:0009963, positive regulation of flavonoid biosynthetic pro…	K13422-ko04016 MAPK signaling pathway - plant;ko04075 Plant hormone signal transduction	-0.00307058	0.0522079	0.0395754	-0.0953967	0.0668044	-0.229731	0.35928	0.46995	0.741487	-0.429261	0.0789714	-0.268696	-0.0641668	0.0300351	0.434925	-0.299959	-0.440515	-0.429649	-0.0613422	-0.0418615	0.130229	0.37226	0.686607	0.757348	0.681764	0.0388404	-0.209412	-0.530306	-0.0452924	0.230647	0.0939587	-0.24823	2
T_46111_c0_g1	MADS->MADS-MIKC	gi|734413464|gb|KHN36909.1| Putative WRKY transcription factor 70 [Glycine soja] 5.7e-118	GO:0003700, DNA binding transcription factor activity;GO:0005634, nucleus;GO:0006351, transcription, DNA-templated;GO:0009751, response to salicylic acid;GO:0009753, response to jasmonic acid;GO:0009862, systemic acquired resistance, salicylic acid mediated signaling pathway;GO:0009864, induced systemic resistance, jasmonic acid mediated signaling pathway;GO:0010200, response to chitin;GO:0031347…	-	0.0370287	-0.801587	-0.721182	-0.387656	-0.0148679	-0.586151	0.0183103	-0.290071	-0.0926418	0.246449	-0.581122	0.272169	0.166598	-0.577522	-0.204935	-0.451487	0.31914	0.102442	-0.304898	-0.508208	-0.414995	-0.593042	0.0994586	-0.375727	-0.425744	0.429323	-0.542971	-0.355494	-0.110061	-0.411674	0.333795	-0.149812	2
T_44885_c0_g6	NAC	gi|593324955|ref|XP_007137231.1| hypothetical protein PHAVU_009G110500g [Phaseolus vulgaris] 1.5e-116	GO:0003677, DNA binding;GO:0005634, nucleus;GO:0006351, transcription, DNA-templated;GO:0006355, regulation of transcription, DNA-templated;GO:0008289, lipid binding;GO:0030154, cell differentiation	-	0.163737	0.638831	0.419282	0.77922	0.273302	0.276678	0.00290712	0.495564	-0.0086818	0.255208	0.214589	-0.0575035	0.460673	0.0322876	-0.301054	0.129178	0.106684	-0.14916	0.0199825	0.231782	-0.255359	0.163167	-0.18971	-0.205891	-0.0899175	-0.272112	0.580117	0.701221	0.180887	0.282481	-0.144121	0.643516	2
T_44328_c2_g7	C2H2	gi|947086427|gb|KRH35148.1| hypothetical protein GLYMA_10G2251001, partial [Glycine max] 8.1e-56	GO:0003677, DNA binding;GO:0003700, DNA binding transcription factor activity;GO:0005634, nucleus;GO:0006351, transcription, DNA-templated	-	-0.355634	-0.540197	-0.683443	0.0156925	-0.213313	-0.56615	0.302029	0.0763321	-0.0275323	0.342706	-0.635437	0.192022	0.533927	-0.782244	-0.294939	-0.580288	0.185021	-0.055718	-0.734825	-0.639152	-0.293599	-0.696598	0.158242	-0.497288	-0.539911	0.3584	-0.439141	-0.278932	-0.312525	-0.240054	-0.0923874	0.102515	2
T_34320_c0_g1	AP2/ERF->AP2/ERF-ERF	gi|734373898|gb|KHN20508.1| Protein FAR1-RELATED SEQUENCE 6 [Glycine soja] 0.0e+00	GO:0005634, nucleus;GO:0006355, regulation of transcription, DNA-templated;GO:0008270, zinc ion binding	-	-0.421307	-0.719185	-0.746181	-0.463	-0.293176	-0.487238	-0.00123071	-0.267548	-0.173804	0.430313	-0.627142	0.165971	0.169747	-0.636866	-0.166205	-0.476281	0.225197	-0.0260829	-0.489845	-0.612055	-0.145718	-0.595483	0.36217	-0.455455	-0.363584	0.531241	-0.493265	-0.426965	-0.250073	-0.45357	-0.224232	-0.245515	2
T_40184_c0_g4	OFP	gi|951027597|ref|XP_014514213.1| PREDICTED: zinc finger CCCH domain-containing protein 30 [Vigna radiata var. radiata] 0.0e+00	GO:0003677, DNA binding;GO:0003700, DNA binding transcription factor activity;GO:0005634, nucleus;GO:0005737, cytoplasm;GO:0006355, regulation of transcription, DNA-templated;GO:0046872, metal ion binding	-	0.260873	0.765801	0.674464	0.568745	0.423748	0.314651	-0.0980426	0.459336	0.035005	-0.136204	0.424432	-0.141662	0.350788	0.378425	-0.0163445	0.321238	0.0216287	-0.101612	0.250944	0.51873	-0.197036	0.459853	-0.382307	0.132639	0.0984938	-0.283916	0.614671	0.704625	0.191846	0.366086	0.149339	0.543869	2
T_41402_c3_g1	C3H	gi|955354239|ref|XP_014620342.1| PREDICTED: ethylene-responsive transcription factor 9-like [Glycine max] 8.4e-62	GO:0003677, DNA binding;GO:0003700, DNA binding transcription factor activity;GO:0005634, nucleus;GO:0006351, transcription, DNA-templated;GO:0006952, defense response;GO:0009873, ethylene-activated signaling pathway;GO:0016020, membrane	-	0.0744116	-0.040284	-0.0795982	-0.146634	0.00456514	-0.378914	0.459781	0.480244	0.748276	-0.438727	-0.0124604	-0.161187	-0.0356486	-0.0243667	0.492264	-0.420995	-0.450088	-0.466059	-0.219957	-0.136069	0.0994062	0.30099	0.560275	0.736042	0.522174	0.0636042	-0.332932	-0.554824	-0.0690356	0.322634	0.185709	-0.304843	2
T_44820_c0_g2	C2H2	gi|955328814|ref|XP_014633006.1| PREDICTED: uncharacterized protein LOC100820426 [Glycine max] 2.1e-95	GO:0001944, vasculature development;GO:0003677, DNA binding;GO:0003700, DNA binding transcription factor activity;GO:0005634, nucleus;GO:0006351, transcription, DNA-templated;GO:0009873, ethylene-activated signaling pathway;GO:0010200, response to chitin;GO:0050832, defense response to fungus;GO:0051301, cell division	-	0.0697241	-0.0495283	-0.0630912	-0.143553	0.0759078	-0.342232	0.371168	0.415784	0.725237	-0.434892	-0.00560116	-0.223127	-0.0442266	-0.0141454	0.418382	-0.38328	-0.398362	-0.397798	-0.142501	-0.0968463	0.0646905	0.291361	0.634886	0.744162	0.594021	0.065095	-0.296406	-0.578622	-0.077457	0.273951	0.168437	-0.25672	2
T_41736_c1_g1	AP2/ERF->AP2/ERF-ERF	gi|947070229|gb|KRH19120.1| hypothetical protein GLYMA_13G102000 [Glycine max] 1.3e-129	GO:0003700, DNA binding transcription factor activity;GO:0005516, calmodulin binding;GO:0005634, nucleus;GO:0006351, transcription, DNA-templated;GO:0010200, response to chitin;GO:0042742, defense response to bacterium;GO:0043565, sequence-specific DNA binding	-	-0.129591	-0.201541	-0.16186	-0.31936	0.0206394	-0.369926	0.328467	0.305728	0.727542	-0.504909	-0.0676136	-0.179691	-0.0919742	-0.0893654	0.44117	-0.366142	-0.364346	-0.405927	-0.136006	-0.193654	0.155817	0.172779	0.701519	0.630222	0.602471	0.130831	-0.439893	-0.659535	-0.103921	0.0543514	0.165132	-0.431318	2
T_42116_c1_g5	GRAS	gi|356544570|ref|XP_003540722.1| PREDICTED: scarecrow-like protein 14 [Glycine max] 0.0e+00	GO:0003700, DNA binding transcription factor activity;GO:0005634, nucleus;GO:0005829, cytosol;GO:0006351, transcription, DNA-templated;GO:0006355, regulation of transcription, DNA-templated;GO:0009410, response to xenobiotic stimulus;GO:0043565, sequence-specific DNA binding;GO:0045893, positive regulation of transcription, DNA-templated	-	0.206468	0.382219	0.436523	0.112997	0.469592	0.0833903	0.0230524	0.240218	0.426001	-0.530276	0.340615	-0.291315	-0.0567761	0.499011	0.40634	0.194628	-0.220589	-0.072964	0.293586	0.451321	0.110448	0.498251	0.228279	0.782421	0.703752	-0.0648542	0.117694	-0.0648443	0.156378	0.335487	0.299686	0.035708	2
T_42418_c3_g3	C2C2->C2C2-Dof	gi|955329046|ref|XP_014633048.1| PREDICTED: dof zinc finger protein DOF2.2-like [Glycine max] 1.3e-34	GO:0003677, DNA binding;GO:0003700, DNA binding transcription factor activity;GO:0005634, nucleus;GO:0006351, transcription, DNA-templated;GO:0006355, regulation of transcription, DNA-templated;GO:0044212, transcription regulatory region DNA binding;GO:0046872, metal ion binding	-	0.273251	0.179458	0.214334	0.184248	-0.24291	-0.0890984	0.45296	0.462304	0.435867	-0.207222	0.316315	-0.736934	0.22239	-0.160291	0.0677891	-0.145252	-0.194419	-0.0707062	-0.164326	0.103265	-0.0978667	0.307459	0.276174	0.135794	0.327311	-0.0864452	0.349171	-0.0712525	-0.80936	0.241389	-0.41513	0.0608223	2
T_40403_c3_g4	MYB->MYB-related	gi|920711316|gb|KOM52565.1| hypothetical protein LR48_Vigan09g122400 [Vigna angularis] 1.4e-80	GO:0003677, DNA binding;GO:0005634, nucleus;GO:0006351, transcription, DNA-templated;GO:0006355, regulation of transcription, DNA-templated;GO:0009908, flower development;GO:0048262, determination of dorsal/ventral asymmetry	-	-0.310873	-0.646953	-0.676451	-0.327735	-0.0826703	-0.603014	0.254377	-0.0750833	0.438823	-0.0839528	-0.606976	0.306988	0.0206864	-0.579294	0.0884388	-0.627518	-0.0419606	-0.280171	-0.420855	-0.749029	-0.0990867	-0.389386	0.436987	-0.0657534	-0.0620173	0.275388	-0.80522	-0.585188	0.0327507	-0.189619	0.241396	-0.395156	2
T_41561_c1_g2	NAC	gi|356539240|ref|XP_003538107.1| PREDICTED: NAC domain-containing protein 90 [Glycine max] 5.8e-62	GO:0003677, DNA binding;GO:0003700, DNA binding transcription factor activity;GO:0005634, nucleus;GO:0006351, transcription, DNA-templated;GO:0006355, regulation of transcription, DNA-templated	-	0.0434381	-0.043818	0.0448209	-0.325136	0.188453	-0.198736	0.0785981	0.210199	0.587429	-0.48275	0.0904396	-0.308281	-0.168039	0.171781	0.384233	-0.178804	-0.212528	-0.241861	0.137316	0.0956951	0.0872159	0.358106	0.628315	0.770097	0.717147	0.0836576	-0.231257	-0.563134	-0.0980757	0.119706	0.205835	-0.284703	2
T_44347_c1_g7	C2C2->C2C2-Dof	gi|356513607|ref|XP_003525503.1| PREDICTED: dof zinc finger protein DOF5.6-like [Glycine max] 2.6e-141	GO:0003677, DNA binding;GO:0003700, DNA binding transcription factor activity;GO:0005634, nucleus;GO:0006351, transcription, DNA-templated;GO:0006355, regulation of transcription, DNA-templated;GO:0010067, procambium histogenesis;GO:0010087, phloem or xylem histogenesis;GO:0045893, positive regulation of transcription, DNA-templated;GO:0046872, metal ion binding	-	-0.0105898	-0.442253	-0.535302	0.131794	-0.389901	-0.362584	0.344987	0.0613296	-0.0986675	0.364608	-0.395253	0.282448	0.330356	-0.712006	-0.360304	-0.401057	0.16251	-0.0169146	-0.587846	-0.553494	-0.233907	-0.592505	-0.121955	-0.759018	-0.654374	0.154445	-0.19951	0.0561436	-0.309702	-0.198071	-0.145845	0.0303443	2
T_45137_c2_g1	C2H2	gi|920683557|gb|KOM30247.1| hypothetical protein LR48_Vigan1082s001900 [Vigna angularis] 7.1e-115	GO:0003676, nucleic acid binding;GO:0003700, DNA binding transcription factor activity;GO:0005634, nucleus;GO:0006351, transcription, DNA-templated;GO:0006355, regulation of transcription, DNA-templated;GO:0044212, transcription regulatory region DNA binding;GO:0046872, metal ion binding	-	0.093412	0.705811	0.571279	0.73441	0.25994	0.32266	0.0873833	0.552246	0.126081	0.0572566	0.358225	-0.276804	0.458597	0.135273	-0.119236	0.228921	0.00720179	-0.0735503	0.148937	0.340973	-0.157531	0.365392	-0.138505	-0.0166753	0.12435	-0.212252	0.599831	0.620621	0.0192186	0.239713	-0.144722	0.605288	2
T_45225_c3_g2	WRKY	gi|356551801|ref|XP_003544262.1| PREDICTED: probable WRKY transcription factor 70 [Glycine max] 1.1e-97	GO:0003700, DNA binding transcription factor activity;GO:0005634, nucleus;GO:0006351, transcription, DNA-templated;GO:0009751, response to salicylic acid;GO:0009753, response to jasmonic acid;GO:0009862, systemic acquired resistance, salicylic acid mediated signaling pathway;GO:0009864, induced systemic resistance, jasmonic acid mediated signaling pathway;GO:0010200, response to chitin;GO:0031347…	-	-0.201888	-0.714927	-0.667222	-0.299948	-0.399091	-0.524452	0.382599	-0.0710862	0.089711	0.252145	-0.489534	0.0433083	0.154137	-0.768406	-0.102699	-0.474139	0.135865	-0.0719858	-0.563018	-0.626672	-0.121478	-0.581912	0.311431	-0.485936	-0.292744	0.40043	-0.477495	-0.43193	-0.39907	-0.422879	-0.046533	-0.33261	2
T_45539_c1_g1	GRAS	gi|356551832|ref|XP_003544277.1| PREDICTED: scarecrow-like transcription factor PAT1 [Glycine max] 1.5e-304	GO:0003700, DNA binding transcription factor activity;GO:0004871, signal transducer activity;GO:0005634, nucleus;GO:0005737, cytoplasm;GO:0006351, transcription, DNA-templated;GO:0006355, regulation of transcription, DNA-templated;GO:0009640, photomorphogenesis;GO:0043565, sequence-specific DNA binding	-	0.118287	0.450931	0.402235	0.513309	0.551958	0.311293	-0.426409	0.0666056	-0.382217	0.0358461	0.188025	-0.0971754	0.553088	0.22014	-0.466464	0.367071	0.454507	0.310718	0.29667	0.461121	-0.374332	-0.00466705	-0.495175	-0.28382	-0.236714	-0.305999	0.5427	0.726721	0.0378675	-0.0206351	0.139773	0.776291	2
T_45726_c0_g4	B3->B3	gi|571492088|ref|XP_006592123.1| PREDICTED: B3 domain-containing protein REM20 isoform X2 [Glycine max] 1.4e-71	GO:0003677, DNA binding;GO:0005634, nucleus;GO:0006351, transcription, DNA-templated;GO:0006355, regulation of transcription, DNA-templated	-	-0.0350781	-0.587034	-0.613841	-0.144354	-0.0838871	-0.625934	0.0919584	-0.222526	-0.180338	0.389962	-0.626293	0.00273301	0.514092	-0.756732	-0.346604	-0.482454	0.345293	0.0758739	-0.626516	-0.58647	-0.452319	-0.668783	-0.0241881	-0.710031	-0.571659	0.445941	-0.304763	-0.0196676	-0.258312	-0.161565	-0.0543871	0.079615	2
T_43832_c1_g2	bHLH	gi|358248852|ref|NP_001239951.1| transcription factor bHLH35-like [Glycine max] 1.2e-101	GO:0003677, DNA binding;GO:0005634, nucleus;GO:0006351, transcription, DNA-templated;GO:0006355, regulation of transcription, DNA-templated	-	0.0488362	-0.565678	-0.58011	-0.252393	-0.289611	-0.761845	0.693782	0.215888	0.69809	-0.251095	-0.43408	-0.147978	0.145944	-0.673193	0.232561	-0.775284	-0.165916	-0.365165	-0.696786	-0.693273	-0.137064	-0.236038	0.418745	0.028028	0.0142432	0.11581	-0.636769	-0.615161	-0.495572	0.128129	0.140765	-0.443673	2
T_38712_c0_g3	WRKY	gi|356553124|ref|XP_003544908.1| PREDICTED: probable WRKY transcription factor 25 [Glycine max] 5.1e-104	GO:0003700, DNA binding transcription factor activity;GO:0005634, nucleus;GO:0006351, transcription, DNA-templated;GO:0006970, response to osmotic stress;GO:0009408, response to heat;GO:0009409, response to cold;GO:0009414, response to water deprivation;GO:0009651, response to salt stress;GO:0010120, camalexin biosynthetic process;GO:0010200, response to chitin;GO:0010508, positive regulation of …	K13424-ko04016 MAPK signaling pathway - plant	-0.0145626	-0.0545538	0.0165169	-0.203114	0.186908	-0.197478	0.229677	0.224001	0.630371	-0.415313	0.0421445	-0.215816	-0.16319	0.0869447	0.484288	-0.169545	-0.319846	-0.294704	0.0408984	0.00070541	0.144378	0.331335	0.696167	0.703082	0.742505	0.158399	-0.242559	-0.509749	0.0415036	0.0696257	0.220339	-0.340458	2
T_42214_c5_g2	bHLH	gi|734313401|gb|KHN01298.1| Transcription factor bHLH25 [Glycine soja] 9.3e-147	GO:0003677, DNA binding;GO:0003700, DNA binding transcription factor activity;GO:0005634, nucleus;GO:0006351, transcription, DNA-templated;GO:0006355, regulation of transcription, DNA-templated	-	-0.293815	-0.622472	-0.670635	-0.17809	-0.32353	-0.415933	0.41744	-0.0918138	0.0368145	0.296825	-0.596024	0.209407	0.202653	-0.768093	-0.0533879	-0.485831	0.0412504	-0.232529	-0.612455	-0.768549	-0.00605826	-0.554181	0.211523	-0.612443	-0.426574	0.0489668	-0.477195	-0.206826	-0.0443483	-0.408966	0.0600314	-0.324581	2
T_39883_c1_g1	MYB->MYB-related	gi|734341582|gb|KHN09750.1| Protein ODORANT1 [Glycine soja] 1.8e-68	GO:0003677, DNA binding;GO:0005634, nucleus;GO:0006351, transcription, DNA-templated;GO:0006355, regulation of transcription, DNA-templated	-	-0.242715	-0.723622	-0.679879	-0.491483	-0.177273	-0.640679	0.208337	-0.167862	0.0449008	-0.181515	-0.519946	0.316338	0.202914	-0.422872	0.110344	-0.465425	0.0244353	0.020833	-0.423171	-0.531687	-0.137618	-0.530913	-0.172016	-0.160123	-0.515177	0.280759	-0.767701	-0.457129	-0.221253	-0.278158	0.347897	-0.299394	2
T_39409_c0_g2	MYB->MYB-related	gi|955332373|ref|XP_014633711.1| PREDICTED: probable protein phosphatase 2C 40 [Glycine max] 4.9e-194	GO:0004722, protein serine/threonine phosphatase activity;GO:0046872, metal ion binding	-	-0.0435481	-0.0043017	-0.0962271	-0.0479121	0.449042	-0.0447594	-0.419789	-0.291953	-0.458734	0.364527	-0.298823	0.55132	0.168977	0.208669	0.0427768	0.120786	0.359005	0.0778198	0.119199	0.0163061	-0.197552	-0.170044	-0.544574	-0.173815	-0.484657	0.235934	-0.192884	0.429678	0.747814	-0.0503214	0.481684	0.1922	1
T_40844_c2_g1	FAR1	gi|351722480|ref|NP_001234943.1| PLETHORA 2 [Glycine max] 1.5e-101	GO:0000723, telomere maintenance;GO:0003677, DNA binding;GO:0003700, DNA binding transcription factor activity;GO:0005634, nucleus;GO:0006351, transcription, DNA-templated;GO:0007275, multicellular organism development;GO:0007389, pattern specification process;GO:0009734, auxin-activated signaling pathway;GO:0009873, ethylene-activated signaling pathway;GO:0010449, root meristem growth;GO:0019827…	-	-0.197128	-0.628677	-0.705289	-0.211146	-0.259454	-0.210559	-0.0639983	-0.487417	-0.467487	0.562434	-0.663525	0.552511	-0.000553216	-0.387616	-0.325569	-0.296264	0.365886	0.275521	-0.29052	-0.57968	0.0811651	-0.589686	-0.131037	-0.540696	-0.675186	0.168859	-0.560261	-0.173953	0.189254	-0.297061	0.0854546	-0.017411	1
T_101533_c0_g1	C2H2	-	-	-	0.0398404	0.345465	0.269918	0.487506	-0.188069	-0.0328421	0.682518	0.740825	0.666585	-0.149335	0.271739	-0.508694	0.331314	-0.336566	0.152737	-0.155031	-0.326998	-0.44449	-0.262897	-0.100465	-0.0255478	0.249285	0.290736	-0.051623	0.298885	-0.193639	0.287617	0.162846	-0.382542	0.163115	-0.296828	0.0186021	1
T_36080_c0_g1	AP2/ERF->AP2/ERF-ERF	-	-	-	-0.126209	-0.0278897	-0.0703799	0.0996497	0.26546	0.0433863	-0.141129	-0.0623594	-0.124405	0.0215111	-0.161147	0.769074	0.0158921	0.0139905	0.0726898	0.0812368	0.0331553	-0.146797	0.0924182	-0.129484	-0.117075	-0.073824	-0.326885	-0.254373	-0.313988	0.012884	-0.135452	0.371925	0.632397	-0.261523	0.529071	-0.0249768	1
T_36154_c0_g1	WRKY	gi|356503823|ref|XP_003520702.1| PREDICTED: NAC domain-containing protein 90-like [Glycine max] 2.5e-128	GO:0003677, DNA binding;GO:0003700, DNA binding transcription factor activity;GO:0005634, nucleus;GO:0006351, transcription, DNA-templated;GO:0006355, regulation of transcription, DNA-templated	-	0.00436076	-0.292067	-0.108758	-0.708275	0.0919169	-0.288162	-0.17887	-0.200644	0.223943	-0.45182	-0.00594666	-0.227331	-0.279042	0.206173	0.353982	-0.0947882	-0.0806492	-0.0382124	0.113583	0.0967741	0.0869832	0.12713	0.365246	0.565812	0.460116	0.278713	-0.329278	-0.579346	-0.169876	-0.00142712	0.163508	-0.453471	1
T_42616_c3_g8	HB->HB-WOX	gi|356508136|ref|XP_003522816.1| PREDICTED: tRNA-dihydrouridine(47) synthase [NAD(P)(+)]-like isoform X2 [Glycine max] 0.0e+00	GO:0005829, cytosol;GO:0017150, tRNA dihydrouridine synthase activity;GO:0046872, metal ion binding;GO:0050660, flavin adenine dinucleotide binding	-	-0.120367	-0.120684	-0.255636	0.203199	0.181474	0.201855	-0.408815	-0.327202	-0.753941	0.653509	-0.354273	0.457923	0.263748	0.0230378	-0.522191	0.121453	0.544882	0.454733	0.0964663	-0.0238468	-0.0247248	-0.404619	-0.327177	-0.436166	-0.61169	-0.0153296	-0.0414754	0.305137	0.404258	-0.278565	0.103603	0.548124	1
T_41844_c1_g2	bHLH	gi|571523947|ref|XP_006598713.1| PREDICTED: uncharacterized protein LOC100500526 isoform X1 [Glycine max] 5.5e-260	GO:0003676, nucleic acid binding;GO:0003700, DNA binding transcription factor activity;GO:0005634, nucleus;GO:0006351, transcription, DNA-templated;GO:0006355, regulation of transcription, DNA-templated;GO:0010044, response to aluminum ion;GO:0010447, response to acidic pH;GO:0046872, metal ion binding	-	-0.0253612	-0.682436	-0.621783	-0.266293	0.500181	-0.662197	-0.185541	-0.451361	-0.0344689	0.121923	-0.709422	0.224997	0.435038	-0.443724	-0.0708176	-0.432434	0.499881	0.24021	-0.217967	-0.459375	-0.679789	-0.419936	0.0349671	-0.277206	-0.317396	0.533427	-0.551247	-0.13989	-0.026785	-0.31176	0.561887	0.0828464	1
T_39591_c3_g5	MYB->MYB-related	gi|356510689|ref|XP_003524068.1| PREDICTED: ethylene-responsive transcription factor 5 [Glycine max] 1.4e-109	GO:0003677, DNA binding;GO:0003700, DNA binding transcription factor activity;GO:0005634, nucleus;GO:0006351, transcription, DNA-templated;GO:0006952, defense response;GO:0009409, response to cold;GO:0009873, ethylene-activated signaling pathway;GO:0010200, response to chitin	-	0.0935174	0.0424711	0.0536847	-0.0275297	-0.0673732	-0.328128	0.56801	0.599159	0.778547	-0.529403	0.158863	-0.40755	0.0685941	-0.10158	0.408831	-0.32638	-0.493581	-0.428735	-0.246283	-0.0271872	0.0561858	0.262393	0.535453	0.638089	0.559375	0.00525591	-0.127883	-0.495053	-0.330704	0.273751	0.0432833	-0.243079	1
T_39591_c3_g1	MYB->MYB-related	gi|955321303|ref|XP_014631241.1| PREDICTED: homeobox-leucine zipper protein ATHB-6 isoform X1 [Glycine max] 2.6e-122	GO:0003677, DNA binding;GO:0003700, DNA binding transcription factor activity;GO:0005634, nucleus;GO:0006351, transcription, DNA-templated;GO:0009414, response to water deprivation;GO:0009738, abscisic acid-activated signaling pathway;GO:0009788, negative regulation of abscisic acid-activated signaling pathway;GO:0043565, sequence-specific DNA binding;GO:0045893, positive regulation of transcript…	-	0.107748	0.285362	0.247498	0.378155	0.556689	-0.0653539	-0.147234	0.143671	-0.161203	0.00216546	0.00439249	-0.158732	0.735425	-0.0107685	-0.159321	0.125551	0.359803	0.120118	0.0173089	0.22017	-0.557874	-0.043819	-0.536266	-0.29317	-0.327412	-0.0538262	0.309555	0.660311	-0.00607299	0.0165341	0.320064	0.589417	1
T_42350_c1_g4	WRKY	gi|359806196|ref|NP_001240948.1| DELLA protein GAI 1 [Glycine max] 4.0e-274	GO:0000989, transcription factor activity, transcription factor binding;GO:0003700, DNA binding transcription factor activity;GO:0005634, nucleus;GO:0006351, transcription, DNA-templated;GO:0006355, regulation of transcription, DNA-templated;GO:0009723, response to ethylene;GO:0009737, response to abscisic acid;GO:0009740, gibberellic acid mediated signaling pathway;GO:0009863, salicylic acid med…	K14494-ko04075 Plant hormone signal transduction	-0.0658594	0.63558	0.555239	0.395817	-0.283837	0.305125	0.456674	0.84906	0.471058	-0.382016	0.640415	-0.483572	0.119477	0.0504665	0.122129	0.164263	-0.540312	-0.552332	-0.0431919	0.287481	0.276512	0.294645	0.122582	0.143873	0.342561	-0.530919	0.526678	0.208283	-0.261972	0.185812	-0.46024	-0.0347086	1
T_45788_c2_g3	B3->B3	gi|356535794|ref|XP_003536428.1| PREDICTED: uncharacterized protein LOC100812134 [Glycine max] 1.9e-204	-	-	0.115141	-0.614854	-0.645584	0.0716845	0.176103	-0.570022	0.142701	-0.402488	-0.0664999	0.420245	-0.724878	0.270877	0.400392	-0.653121	-0.203671	-0.44161	0.467295	0.230342	-0.447819	-0.671187	-0.490975	-0.56005	-0.146502	-0.681332	-0.557322	0.388776	-0.487818	0.111635	0.0410124	-0.140033	0.326459	0.103055	1
T_41287_c2_g1	SBP	gi|358248978|ref|NP_001239972.1| zinc finger protein CONSTANS-LIKE 5-like [Glycine max] 3.5e-166	GO:0003700, DNA binding transcription factor activity;GO:0005634, nucleus;GO:0006355, regulation of transcription, DNA-templated;GO:0008270, zinc ion binding;GO:0009416, response to light stimulus;GO:0009909, regulation of flower development	-	-0.172257	-0.0665031	-0.0482594	-0.124871	-0.292706	-0.317381	0.686541	0.573792	0.931546	-0.655499	0.129946	-0.259423	-0.0858927	-0.263289	0.499555	-0.355906	-0.630908	-0.623946	-0.338023	-0.2711	0.261486	0.16148	0.617828	0.415965	0.561619	-0.0609986	-0.287048	-0.525868	-0.335786	0.0936285	-0.0796616	-0.583656	1
T_39554_c3_g1	MYB->MYB-related	gi|571542493|ref|XP_003552298.2| PREDICTED: transcription factor bHLH51-like [Glycine max] 1.0e-76	GO:0003677, DNA binding;GO:0003700, DNA binding transcription factor activity;GO:0005634, nucleus;GO:0006351, transcription, DNA-templated;GO:0006355, regulation of transcription, DNA-templated	-	0.283386	-0.299063	-0.319758	0.0284884	0.399937	-0.329649	-0.336158	-0.465814	-0.546889	0.390781	-0.530081	0.28707	0.462437	-0.234666	-0.423587	-0.158831	0.684705	0.400384	-0.190592	-0.182105	-0.612953	-0.421221	-0.609876	-0.569244	-0.740108	0.165685	-0.121582	0.39004	0.140203	0.00748163	0.5076	0.467971	1
T_42109_c1_g1	AP2/ERF->AP2/ERF-ERF	gi|1012344075|gb|KYP55267.1| NAC domain-containing protein 78 [Cajanus cajan] 1.2e-137	GO:0003677, DNA binding;GO:0003700, DNA binding transcription factor activity;GO:0005634, nucleus;GO:0006351, transcription, DNA-templated;GO:0006355, regulation of transcription, DNA-templated;GO:0044212, transcription regulatory region DNA binding;GO:0090602, sieve element enucleation;GO:0090603, sieve element differentiation	-	0.118275	0.227036	0.259106	0.106366	0.66285	0.184314	-0.639432	-0.315702	-0.544296	0.0431788	0.0235895	0.267933	0.264966	0.403417	-0.171497	0.393154	0.412122	0.340263	0.45224	0.391324	-0.416932	-0.00110262	-0.774711	-0.146075	-0.402648	-0.0693856	0.210471	0.631217	0.477661	-0.0759419	0.527387	0.494468	1
T_44641_c0_g1	C2H2	gi|359806583|ref|NP_001241268.1| transcription factor ICE1-like [Glycine max] 1.3e-146	GO:0003677, DNA binding;GO:0003700, DNA binding transcription factor activity;GO:0005634, nucleus;GO:0006351, transcription, DNA-templated;GO:0009409, response to cold;GO:0010440, stomatal lineage progression;GO:0045893, positive regulation of transcription, DNA-templated;GO:0050826, response to freezing	-	-0.397703	-0.720505	-0.676041	-0.335775	-0.308979	-0.412674	0.322602	-0.233751	-0.0441548	0.142404	-0.587267	0.310278	0.0742095	-0.610954	-0.0198267	-0.34921	0.0929989	-0.0136712	-0.486034	-0.654521	0.148759	-0.630521	0.128783	-0.429013	-0.377611	0.239683	-0.678169	-0.420016	-0.0035003	-0.491422	0.243329	-0.359311	1
T_40542_c0_g1	B3->B3-ARF	gi|593797252|ref|XP_007161664.1| hypothetical protein PHAVU_001G088200g [Phaseolus vulgaris] 4.8e-35	GO:0000122, negative regulation of transcription by RNA polymerase II;GO:0001046, core promoter sequence-specific DNA binding;GO:0003700, DNA binding transcription factor activity;GO:0005634, nucleus;GO:0006351, transcription, DNA-templated;GO:0010055, atrichoblast differentiation;GO:0032107, regulation of response to nutrient levels;GO:0043565, sequence-specific DNA binding;GO:0043620, regulatio…	-	0.100905	0.173686	0.348956	-0.240712	0.364826	0.0661741	-0.139931	-0.021268	0.309388	-0.60133	0.354846	-0.181046	-0.315456	0.577455	0.536146	0.263366	-0.263818	0.0346346	0.430097	0.471332	0.102974	0.497984	0.196023	0.832414	0.694544	0.144093	0.00951344	-0.261606	0.0597017	0.120573	0.298499	-0.225849	1
T_39863_c2_g3	MYB->MYB	gi|950968986|ref|XP_014499705.1| PREDICTED: ocs element-binding factor 1-like [Vigna radiata var. radiata] 2.7e-58	GO:0003700, DNA binding transcription factor activity;GO:0009845, seed germination;GO:0043565, sequence-specific DNA binding;GO:0044212, transcription regulatory region DNA binding;GO:0046982, protein heterodimerization activity	-	-0.0842538	0.13043	0.230432	-0.116362	0.243968	0.259159	-0.469979	-0.310035	-0.600673	-0.0114041	0.113987	0.331801	0.0370026	0.346606	-0.0367507	0.50088	0.245527	0.239609	0.322105	0.344855	-0.0185269	-0.0807666	-0.72234	-0.277909	-0.385365	0.00424316	0.172499	0.520469	0.3741	-0.272023	0.356252	0.118204	1
T_38886_c0_g5	AP2/ERF->AP2/ERF-ERF	gi|955354906|ref|XP_014620471.1| PREDICTED: GATA transcription factor 11-like isoform X2 [Glycine max] 3.7e-100	GO:0000977, RNA polymerase II regulatory region sequence-specific DNA binding;GO:0001085, RNA polymerase II transcription factor binding;GO:0001228, transcriptional activator activity, RNA polymerase II transcription regulatory region sequence-specific DNA binding;GO:0003682, chromatin binding;GO:0003700, DNA binding transcription factor activity;GO:0005634, nucleus;GO:0005667, transcription fact…	-	-0.238935	-0.45617	-0.583216	0.0549395	0.0335937	-0.0837414	-0.259848	-0.455864	-0.568864	0.596342	-0.629388	0.533055	0.253836	-0.323231	-0.524411	-0.186589	0.547948	0.396965	-0.157205	-0.430062	-0.120389	-0.600916	-0.211227	-0.622226	-0.718063	0.0622661	-0.366772	0.0746078	0.205597	-0.350023	0.0979852	0.333433	1
T_44649_c1_g2	C2H2	gi|571466522|ref|XP_006583684.1| PREDICTED: protein indeterminate-domain 5, chloroplastic-like [Glycine max] 5.8e-68	GO:0003676, nucleic acid binding;GO:0003677, DNA binding;GO:0003700, DNA binding transcription factor activity;GO:0006351, transcription, DNA-templated;GO:0009507, chloroplast;GO:0046872, metal ion binding	-	-0.0855242	-0.259684	-0.42878	0.435234	-0.116844	-0.264013	0.377584	0.0578591	0.0307359	0.448409	-0.435651	0.205576	0.443237	-0.677137	-0.294461	-0.363139	0.168381	-0.0290092	-0.477657	-0.602751	-0.307495	-0.507458	-0.141704	-0.73237	-0.590874	-0.000504985	-0.200519	0.231606	-0.0392736	-0.126907	-0.0832993	0.197959	1
T_38938_c1_g2	MADS->MADS-MIKC	gi|356536669|ref|XP_003536859.1| PREDICTED: transcription factor MYB108 [Glycine max] 1.5e-72	GO:0003677, DNA binding;GO:0003700, DNA binding transcription factor activity;GO:0005634, nucleus;GO:0006351, transcription, DNA-templated;GO:0006952, defense response;GO:0009620, response to fungus;GO:0009651, response to salt stress;GO:0009723, response to ethylene;GO:0009737, response to abscisic acid;GO:0009753, response to jasmonic acid	-	-0.0542227	-0.117357	-0.0761129	-0.345403	0.152468	-0.380885	0.220381	0.28586	0.603418	-0.557831	-0.017415	-0.173457	-0.0389534	0.0790778	0.487245	-0.296636	-0.344618	-0.344998	-0.0950574	-0.0169366	0.0513441	0.205979	0.486224	0.765432	0.522093	0.136493	-0.378892	-0.606186	-0.0701165	0.156664	0.290775	-0.330942	1
T_40967_c0_g1	AP2/ERF->AP2/ERF-AP2	gi|571435090|ref|XP_006573380.1| PREDICTED: two-component response regulator ARR18-like [Glycine max] 3.2e-127	GO:0003677, DNA binding;GO:0003700, DNA binding transcription factor activity;GO:0005634, nucleus;GO:0006351, transcription, DNA-templated;GO:0006355, regulation of transcription, DNA-templated	-	-0.316444	-0.846372	-0.695358	-0.438555	-0.00772745	-0.552864	0.0711036	-0.480243	-0.084799	0.0253731	-0.64217	0.211437	0.204994	-0.623459	-0.0589154	-0.347925	0.214424	0.187127	-0.331008	-0.617962	-0.25978	-0.623041	0.0448037	-0.472283	-0.392072	0.396381	-0.645662	-0.360054	-0.126736	-0.593655	0.365725	-0.258807	1
T_37938_c0_g2	bHLH	gi|356532093|ref|XP_003534608.1| PREDICTED: LOB domain-containing protein 18-like [Glycine max] 5.8e-69	GO:0005634, nucleus;GO:0010089, xylem development;GO:0010311, lateral root formation	-	0.200086	0.409288	0.391774	0.434446	-0.0648281	-0.07744	0.5722	0.660694	0.721596	-0.440555	0.396165	-0.545971	0.277316	-0.141822	0.229501	-0.0808964	-0.327786	-0.333622	-0.173517	0.0682822	-0.105714	0.358893	0.122	0.102672	0.380606	-0.163958	0.317701	0.198011	-0.507735	0.348971	-0.216389	0.0156682	1
T_44323_c1_g1	E2F-DP	gi|593688980|ref|XP_007145109.1| hypothetical protein PHAVU_007G210600g [Phaseolus vulgaris] 9.7e-136	GO:0003677, DNA binding;GO:0003700, DNA binding transcription factor activity;GO:0005634, nucleus;GO:0006351, transcription, DNA-templated;GO:0006355, regulation of transcription, DNA-templated;GO:0016021, integral component of membrane;GO:0046872, metal ion binding	-	0.227613	-0.0135082	-0.0955643	0.432798	0.698988	-0.258772	0.0404881	0.161644	0.179729	0.0459079	-0.317543	0.00750457	0.720604	-0.227439	-0.164011	-0.227157	0.403385	0.0509018	-0.0262666	-0.144654	-0.556573	-0.0498876	-0.0735002	-0.173512	-0.154605	-0.11594	-0.0673659	0.389165	0.188587	-0.0256081	0.614485	0.547297	1
T_41300_c6_g1	AP2/ERF->AP2/ERF-ERF	gi|920679642|gb|KOM26533.1| hypothetical protein LR48_Vigan284s001900 [Vigna angularis] 7.7e-92	GO:0000900, translation repressor activity, mRNA regulatory element binding;GO:0003677, DNA binding;GO:0003700, DNA binding transcription factor activity;GO:0005634, nucleus;GO:0006351, transcription, DNA-templated;GO:0009266, response to temperature stimulus;GO:0009910, negative regulation of flower development;GO:0030154, cell differentiation;GO:0045892, negative regulation of transcription, DN…	-	-0.279318	-0.77777	-0.670067	-0.486517	0.0641082	-0.478715	-0.0477106	-0.401604	-0.208965	0.230435	-0.577158	0.0358984	0.281962	-0.488695	-0.0790876	-0.276702	0.346769	0.177448	-0.253985	-0.426099	-0.205449	-0.630619	0.184664	-0.376121	-0.31838	0.418684	-0.534463	-0.338803	-0.112026	-0.624529	0.222417	-0.185754	1
T_42296_c0_g1	C2H2	gi|356498338|ref|XP_003518010.1| PREDICTED: NAC domain-containing protein 8-like [Glycine max] 2.2e-234	GO:0000077, DNA damage checkpoint;GO:0003677, DNA binding;GO:0003700, DNA binding transcription factor activity;GO:0005634, nucleus;GO:0006351, transcription, DNA-templated;GO:0006355, regulation of transcription, DNA-templated;GO:0010332, response to gamma radiation;GO:0040020, regulation of meiotic nuclear division	-	-0.00948998	-0.759817	-0.68004	-0.25405	0.42968	-0.61324	-0.119553	-0.447708	0.0106904	0.00720601	-0.69846	0.250405	0.354632	-0.44212	-0.131626	-0.454115	0.440286	0.309782	-0.195723	-0.477553	-0.539166	-0.42588	0.162789	-0.200041	-0.23794	0.387443	-0.600723	-0.293309	-0.0982779	-0.357598	0.577433	0.0683746	1
T_39960_c4_g2	MYB->MYB-related	gi|502078281|ref|XP_004485895.1| PREDICTED: trihelix transcription factor ASIL2-like [Cicer arietinum] 3.7e-46	GO:0003677, DNA binding;GO:0003700, DNA binding transcription factor activity;GO:0005634, nucleus;GO:0006351, transcription, DNA-templated;GO:0006355, regulation of transcription, DNA-templated;GO:0009793, embryo development ending in seed dormancy;GO:0010431, seed maturation	-	-0.0603721	0.701431	0.570885	0.360559	-0.27841	0.483476	0.174874	0.588447	0.129896	-0.12578	0.620211	0.12507	-0.262182	0.437461	0.215799	0.389984	-0.380613	-0.358797	0.122833	0.449997	0.453837	0.332945	-0.178328	0.265524	0.201173	-0.199014	0.402514	0.2791	0.160708	0.29912	-0.314633	-0.0591188	1
T_47016_c2_g1	HB->HB-HD-ZIP	gi|356546209|ref|XP_003541523.1| PREDICTED: NAC domain-containing protein 73-like [Glycine max] 3.3e-159	GO:0003677, DNA binding;GO:0003700, DNA binding transcription factor activity;GO:0005634, nucleus;GO:0006351, transcription, DNA-templated;GO:0006355, regulation of transcription, DNA-templated;GO:0044212, transcription regulatory region DNA binding;GO:0045893, positive regulation of transcription, DNA-templated;GO:2000652, regulation of secondary cell wall biogenesis	-	-0.361103	-0.760528	-0.614551	-0.431511	-0.00973925	-0.573478	0.167757	-0.322105	0.0670258	-0.0367401	-0.521478	-0.113154	0.329624	-0.602621	0.0859137	-0.367703	0.121761	0.135525	-0.33776	-0.530966	-0.299984	-0.489418	0.206808	-0.329118	-0.219723	0.418857	-0.533981	-0.407606	-0.402218	-0.579632	0.150135	-0.264559	1
T_44328_c2_g1	C2H2	gi|356499548|ref|XP_003518601.1| PREDICTED: trihelix transcription factor GT-2 [Glycine max] 1.4e-122	GO:0003677, DNA binding;GO:0003700, DNA binding transcription factor activity;GO:0005634, nucleus;GO:0006351, transcription, DNA-templated	-	0.00498344	0.035718	-0.179717	0.483297	0.0941249	0.0845504	-0.0982967	-0.121656	-0.402158	0.713838	-0.358487	0.345151	0.323941	-0.252389	-0.465786	-0.0540659	0.515758	0.173705	-0.201315	-0.235574	-0.164575	-0.322287	-0.252756	-0.656204	-0.535011	-0.000318321	0.0609541	0.505133	0.278998	0.00549819	-0.0451513	0.4781	1
T_44340_c2_g1	C2H2	gi|356563900|ref|XP_003550195.1| PREDICTED: protein ALWAYS EARLY 3-like isoform X1 [Glycine max] 0.0e+00	GO:0003677, DNA binding;GO:0005634, nucleus;GO:0006351, transcription, DNA-templated;GO:0007049, cell cycle;GO:0017053, transcriptional repressor complex	-	-0.155835	-0.104706	-0.275312	0.161715	-0.112652	0.0262941	-0.0163052	-0.0853506	-0.517454	0.578755	-0.334197	0.518446	0.259036	-0.143069	-0.20002	-0.0175118	0.258925	0.111875	-0.213971	-0.224412	0.0639492	-0.361278	-0.432601	-0.519649	-0.706876	0.0746775	-0.129541	0.352457	0.356902	-0.160446	0.0539482	0.23624	1
T_43009_c5_g4	HSF	gi|356546051|ref|XP_003541445.1| PREDICTED: heat stress transcription factor A-3-like [Glycine max] 1.6e-34	GO:0003677, DNA binding;GO:0003700, DNA binding transcription factor activity;GO:0005634, nucleus;GO:0006351, transcription, DNA-templated;GO:0006355, regulation of transcription, DNA-templated;GO:0009408, response to heat;GO:0010200, response to chitin;GO:0043565, sequence-specific DNA binding	-	0.0551828	0.246691	0.280579	0.0546757	-0.248319	-0.0202243	0.467828	0.498809	0.599284	-0.464149	0.414712	-0.574802	-0.121513	0.0933675	0.3629	-0.0465881	-0.585644	-0.250977	-0.108365	0.192524	0.288753	0.384254	0.543663	0.621133	0.700799	0.00983368	0.176919	-0.395595	-0.455828	0.323217	-0.404465	-0.219822	1
T_43783_c2_g1	C2H2	gi|356574462|ref|XP_003555366.1| PREDICTED: transcription factor TCP19-like [Glycine max] 9.8e-125	GO:0003677, DNA binding;GO:0003700, DNA binding transcription factor activity;GO:0005634, nucleus;GO:0006351, transcription, DNA-templated;GO:0006355, regulation of transcription, DNA-templated;GO:0031347, regulation of defense response	-	-0.080463	-0.110486	-0.143336	-0.341378	-0.262395	-0.360543	0.375276	0.343194	0.722479	-0.425566	-0.028918	-0.0720979	-0.272245	-0.0517745	0.452207	-0.42401	-0.436676	-0.497167	-0.23589	-0.256969	0.26966	0.216295	0.525938	0.606047	0.46719	0.138053	-0.471673	-0.646515	-0.11696	0.328207	-0.0354789	-0.52061	1
T_43399_c2_g7	C2H2	gi|356512441|ref|XP_003524927.1| PREDICTED: heat stress transcription factor A-5-like [Glycine max] 9.7e-249	GO:0003700, DNA binding transcription factor activity;GO:0005634, nucleus;GO:0005737, cytoplasm;GO:0006351, transcription, DNA-templated;GO:0043565, sequence-specific DNA binding	-	-0.0740792	-0.684942	-0.660915	-0.216061	0.389364	-0.593608	-0.111251	-0.507381	-0.250651	0.363329	-0.782624	0.31194	0.495404	-0.485249	-0.0697832	-0.383039	0.566501	0.286741	-0.273736	-0.532599	-0.620285	-0.505852	-0.241998	-0.503741	-0.624759	0.458355	-0.561353	0.0306499	0.0869098	-0.38365	0.592313	0.12027	1
T_44434_c1_g2	bHLH	gi|356553804|ref|XP_003545242.1| PREDICTED: myb-related protein 306-like [Glycine max] 6.3e-208	GO:0003677, DNA binding;GO:0003700, DNA binding transcription factor activity;GO:0005634, nucleus;GO:0006351, transcription, DNA-templated;GO:0009414, response to water deprivation;GO:0009651, response to salt stress;GO:0009723, response to ethylene;GO:0009733, response to auxin;GO:0009737, response to abscisic acid;GO:0009738, abscisic acid-activated signaling pathway;GO:0009739, response to gib…	-	0.187209	0.419218	0.54545	-0.152277	0.384338	0.249787	-0.277524	0.041912	0.215633	-0.528029	0.431354	-0.160954	-0.302379	0.688799	0.411091	0.357153	-0.123748	-0.0362445	0.525704	0.558002	0.181887	0.662346	0.0617606	0.712503	0.662778	-0.0612333	0.197266	0.0410512	0.205051	0.253514	0.302025	-0.0934325	1
T_39513_c1_g4	NAC	gi|955315858|ref|XP_014630057.1| PREDICTED: GATA transcription factor 24-like isoform X2 [Glycine max] 2.8e-76	GO:0000977, RNA polymerase II regulatory region sequence-specific DNA binding;GO:0001085, RNA polymerase II transcription factor binding;GO:0001228, transcriptional activator activity, RNA polymerase II transcription regulatory region sequence-specific DNA binding;GO:0003682, chromatin binding;GO:0003700, DNA binding transcription factor activity;GO:0005634, nucleus;GO:0005667, transcription fact…	-	-0.263166	0.233481	0.257651	-0.118413	-0.069573	-0.0926905	0.438409	0.719421	0.610268	-0.600373	0.334234	-0.373683	0.177584	0.00255682	0.464518	-0.0139518	-0.453192	-0.635305	-0.119078	0.134469	0.265967	0.179684	0.304195	0.389118	0.442797	-0.167866	-0.00389279	-0.168512	-0.147561	-0.0632967	0.0560245	-0.349323	1
T_40503_c0_g1	B3->B3-ARF	gi|356564737|ref|XP_003550605.1| PREDICTED: uncharacterized protein LOC100794210 [Glycine max] 0.0e+00	GO:0005634, nucleus;GO:0006351, transcription, DNA-templated;GO:0006355, regulation of transcription, DNA-templated;GO:0008270, zinc ion binding;GO:0009707, chloroplast outer membrane;GO:0016021, integral component of membrane	-	-0.0796735	-0.552915	-0.575957	-0.0956094	0.514178	-0.586701	-0.129675	-0.309363	-0.0726291	0.19132	-0.763192	0.298615	0.59939	-0.483454	-0.192927	-0.430291	0.595739	0.15725	-0.269778	-0.513191	-0.576658	-0.47277	-0.112584	-0.423278	-0.47526	0.307436	-0.560413	0.0513042	0.162488	-0.274408	0.673223	0.243439	1
T_45865_c0_g1	C2H2	gi|955344490|ref|XP_014618383.1| PREDICTED: zinc finger CCCH domain-containing protein 32-like isoform X4 [Glycine max] 1.5e-146	GO:0003677, DNA binding;GO:0005634, nucleus;GO:0046872, metal ion binding	-	0.0597003	0.499256	0.314584	0.36003	-0.0767053	0.135068	0.381594	0.759946	0.365869	-0.175484	0.274219	-0.022503	0.193997	0.134489	0.165807	-0.0589674	-0.274816	-0.472925	-0.0554181	0.122914	0.184148	0.332842	-0.091588	0.276085	0.050933	-0.46169	0.150318	0.194703	0.113866	0.323185	0.0771072	0.137946	1
T_39042_c2_g2	AP2/ERF->AP2/ERF-ERF	gi|734408254|gb|KHN34636.1| Dof zinc finger protein DOF5.2 [Glycine soja] 2.1e-240	GO:0003677, DNA binding;GO:0003700, DNA binding transcription factor activity;GO:0005634, nucleus;GO:0006351, transcription, DNA-templated;GO:0006355, regulation of transcription, DNA-templated;GO:0009908, flower development;GO:0046872, metal ion binding	-	-0.0900659	-0.587537	-0.574647	-0.281339	0.59947	-0.50119	-0.421382	-0.57301	-0.197794	0.159204	-0.709975	0.46849	0.276212	-0.194226	-0.0883407	-0.315325	0.526115	0.285219	-0.043214	-0.360651	-0.562004	-0.382271	-0.0795371	-0.147421	-0.352418	0.455132	-0.596559	-0.110187	0.291824	-0.257344	0.641017	0.134842	1
T_40579_c1_g4	B3->B3-ARF	gi|356554798|ref|XP_003545729.1| PREDICTED: zinc finger CCCH domain-containing protein 37-like [Glycine max] 4.9e-113	GO:0001709, cell fate determination;GO:0003677, DNA binding;GO:0003723, RNA binding;GO:0005634, nucleus;GO:0006397, mRNA processing;GO:0009908, flower development;GO:0016607, nuclear speck;GO:0046872, metal ion binding	-	-0.217903	0.661984	0.608885	0.349358	-0.31726	0.732184	0.171677	0.593335	0.037497	-0.140265	0.687497	-0.142727	-0.195545	0.376113	0.0469393	0.51177	-0.411153	-0.283549	0.314892	0.481667	0.652619	0.340948	0.0714547	0.179473	0.325288	-0.56646	0.551814	0.228719	0.109337	-0.0903806	-0.383668	0.00512104	1
T_43996_c0_g1	AP2/ERF->AP2/ERF-ERF	gi|734420131|gb|KHN40637.1| Putative WRKY transcription factor 70 [Glycine soja] 3.8e-13	GO:0003700, DNA binding transcription factor activity;GO:0043565, sequence-specific DNA binding	-	0.108614	0.0385269	0.0113392	0.373819	0.147779	-0.294211	0.297811	0.303505	0.297879	-0.0736716	-0.0760448	-0.361452	0.707515	-0.442055	-0.139383	-0.220025	0.178742	-0.00620099	-0.252023	-0.199245	-0.474037	-0.0635927	-0.137061	-0.438011	-0.182053	0.0140837	0.120151	0.38685	-0.463871	0.0224397	-0.0178905	0.335788	1
T_44885_c0_g1	NAC	gi|1012343066|gb|KYP54258.1| Homeobox-leucine zipper protein ATHB-15 [Cajanus cajan] 1.8e-218	GO:0003677, DNA binding;GO:0005634, nucleus;GO:0006351, transcription, DNA-templated;GO:0006355, regulation of transcription, DNA-templated;GO:0008289, lipid binding;GO:0030154, cell differentiation	-	0.133405	0.488438	0.391666	0.34917	0.30126	0.33838	-0.185569	0.267479	-0.292273	0.116757	0.235294	0.104114	0.325024	0.32786	-0.093105	0.350637	0.220058	-0.0246146	0.217956	0.407071	0.0112408	0.163963	-0.437338	-0.13351	-0.185622	-0.280267	0.421541	0.701223	0.337473	0.0365254	0.201321	0.418714	1
T_42216_c1_g2	LOB	gi|1012364488|gb|KYP75670.1| Squamosa promoter-binding-like protein 12, partial [Cajanus cajan] 1.1e-108	GO:0003677, DNA binding;GO:0005634, nucleus;GO:0006351, transcription, DNA-templated;GO:0006355, regulation of transcription, DNA-templated;GO:0046872, metal ion binding	-	-0.601894	-0.373825	-0.454781	-0.0790183	-0.306077	-0.107828	0.0860945	-0.114316	-0.269936	0.0795718	-0.359063	0.353563	0.221171	-0.382242	-0.275669	-0.106128	0.107677	0.047785	-0.352789	-0.406488	0.23462	-0.730931	-0.221989	-0.54886	-0.601533	-0.0824249	-0.439026	-0.108465	-0.0166821	-0.431478	-0.079972	-0.0581402	1
T_43259_c1_g2	MYB->MYB	gi|734430887|gb|KHN45670.1| Putative WRKY transcription factor 2 [Glycine soja] 1.3e-309	GO:0003700, DNA binding transcription factor activity;GO:0005634, nucleus;GO:0006351, transcription, DNA-templated;GO:0006355, regulation of transcription, DNA-templated;GO:0009555, pollen development;GO:0009942, longitudinal axis specification;GO:0030010, establishment of cell polarity;GO:0043565, sequence-specific DNA binding	-	-0.101346	-0.563916	-0.589332	-0.116757	0.528456	-0.622764	-0.163827	-0.356629	-0.0121732	0.164425	-0.760716	0.302997	0.526531	-0.504117	-0.171085	-0.454907	0.54076	0.102295	-0.28162	-0.545312	-0.646628	-0.50158	-0.0768002	-0.413757	-0.437741	0.347324	-0.575895	0.012721	0.167334	-0.238824	0.602007	0.167232	1
T_39878_c0_g1	C2H2	gi|734316224|gb|KHN02156.1| Transcription factor MYB1R1 [Glycine soja] 1.0e-77	GO:0003677, DNA binding;GO:0005634, nucleus;GO:0006351, transcription, DNA-templated;GO:0006355, regulation of transcription, DNA-templated;GO:0009908, flower development;GO:0048262, determination of dorsal/ventral asymmetry	-	0.074573	-0.675466	-0.647939	-0.126081	0.306041	-0.522748	-0.28674	-0.495762	-0.345556	0.256684	-0.669641	0.111998	0.53164	-0.510961	-0.587878	-0.378177	0.706418	0.497534	-0.252113	-0.391122	-0.628493	-0.695988	-0.159165	-0.570514	-0.604232	0.251833	-0.387783	-0.0628708	-0.267413	-0.277619	0.292865	0.380782	1
T_45890_c4_g4	HB->HB-HD-ZIP	gi|356572076|ref|XP_003554196.1| PREDICTED: transcription factor HBP-1b(c38)-like isoform X2 [Glycine max] 6.8e-214	GO:0003700, DNA binding transcription factor activity;GO:0005634, nucleus;GO:0006351, transcription, DNA-templated;GO:0043565, sequence-specific DNA binding	K14431-ko04075 Plant hormone signal transduction	-0.0948809	0.473613	0.632419	0.186442	-0.0603907	0.435357	0.149987	0.373482	0.355704	-0.597555	0.756574	-0.631255	-0.147825	0.282136	0.175924	0.469941	-0.471288	-0.102898	0.360818	0.532151	0.253903	0.35424	0.241037	0.33249	0.673158	-0.329742	0.546609	0.0047848	-0.376321	-0.0951263	-0.379491	-0.118368	1
T_44013_c1_g1	AP2/ERF->AP2/ERF-ERF	gi|947103293|gb|KRH51676.1| hypothetical protein GLYMA_06G022300 [Glycine max] 1.3e-47	GO:0003700, DNA binding transcription factor activity;GO:0005634, nucleus;GO:0006351, transcription, DNA-templated;GO:0009737, response to abscisic acid;GO:0009738, abscisic acid-activated signaling pathway;GO:0043565, sequence-specific DNA binding	-	0.0939913	0.640891	0.715867	0.276945	0.0114957	0.499174	0.098371	0.469439	0.0613139	-0.300566	0.666358	-0.496803	0.0149923	0.352328	0.0730956	0.48183	-0.320326	-0.154944	0.299366	0.602874	0.267799	0.437477	0.0078007	0.264997	0.434651	-0.431874	0.69309	0.288923	-0.0265345	0.0608182	-0.130756	0.144763	1
T_46260_c0_g6	C2H2	gi|356538148|ref|XP_003537566.1| PREDICTED: protein SENSITIVE TO PROTON RHIZOTOXICITY 1-like [Glycine max] 1.2e-147	GO:0003676, nucleic acid binding;GO:0005634, nucleus;GO:0006351, transcription, DNA-templated;GO:0006355, regulation of transcription, DNA-templated;GO:0046872, metal ion binding	-	-0.0784764	0.400368	0.442771	-0.0508641	-0.351965	0.171685	0.439858	0.711083	0.642991	-0.696891	0.64863	-0.524621	-0.213266	0.214979	0.40357	0.0860281	-0.680203	-0.520968	0.0401082	0.32379	0.437883	0.433132	0.397138	0.617758	0.663938	-0.384542	0.249069	-0.32079	-0.424972	0.173645	-0.341895	-0.387823	1
T_39591_c2_g1	MYB->MYB-related	gi|951049131|ref|XP_014519882.1| PREDICTED: ethylene-responsive transcription factor 6-like [Vigna radiata var. radiata] 5.1e-97	GO:0000302, response to reactive oxygen species;GO:0001944, vasculature development;GO:0003677, DNA binding;GO:0003700, DNA binding transcription factor activity;GO:0005634, nucleus;GO:0006351, transcription, DNA-templated;GO:0006952, defense response;GO:0009644, response to high light intensity;GO:0009873, ethylene-activated signaling pathway;GO:0010200, response to chitin;GO:0051301, cell divis…	-	0.0931237	-0.180125	-0.168732	-0.17051	0.0289189	-0.491956	0.43707	0.401827	0.713651	-0.466023	-0.0672154	-0.233411	0.0582465	-0.167156	0.363975	-0.468591	-0.365407	-0.35354	-0.285727	-0.164839	-0.0839079	0.144218	0.561608	0.623538	0.458278	0.146291	-0.331982	-0.617628	-0.27504	0.231539	0.181414	-0.257478	1
T_31777_c0_g1	C2H2	gi|734356851|gb|KHN14288.1| Histone H1 [Glycine soja] 7.1e-128	GO:0000784, nuclear chromosome, telomeric region;GO:0000785, chromatin;GO:0000786, nucleosome;GO:0003691, double-stranded telomeric DNA binding;GO:0003700, DNA binding transcription factor activity;GO:0005634, nucleus;GO:0005730, nucleolus;GO:0006334, nucleosome assembly;GO:0006351, transcription, DNA-templated;GO:0006357, regulation of transcription by RNA polymerase II;GO:0009651, response to s…	-	0.0259413	-0.693419	-0.599391	-0.351949	0.398321	-0.56554	-0.234498	-0.615607	-0.145028	0.0730451	-0.705829	0.202425	0.318015	-0.315991	-0.130483	-0.343705	0.625098	0.421728	-0.123537	-0.443332	-0.433682	-0.414842	-0.161433	-0.308687	-0.388482	0.37043	-0.655903	-0.13044	-0.0139044	-0.235241	0.613545	0.0787503	1
T_46204_c0_g1	bZIP	gi|571568054|ref|XP_006606168.1| PREDICTED: ethylene-responsive transcription factor ERF110 [Glycine max] 2.2e-52	GO:0003677, DNA binding;GO:0003700, DNA binding transcription factor activity;GO:0005634, nucleus;GO:0006351, transcription, DNA-templated;GO:0009873, ethylene-activated signaling pathway;GO:0045893, positive regulation of transcription, DNA-templated;GO:0048510, regulation of timing of transition from vegetative to reproductive phase	-	-0.104444	0.170873	0.288593	-0.391873	0.0518942	0.027555	0.0196453	0.0469744	0.181329	-0.516393	0.287251	0.158417	-0.318407	0.464339	0.743642	0.256437	-0.42716	-0.29234	0.215009	0.238144	0.267432	0.384344	-0.260973	0.462286	0.225118	0.0970707	-0.117091	0.0139457	0.325284	0.0418944	0.347309	-0.518658	1
T_42413_c1_g1	NAC	gi|955347076|ref|XP_014618835.1| PREDICTED: uncharacterized protein LOC100799153 [Glycine max] 2.3e-192	GO:0046872, metal ion binding	-	-0.111402	-0.695476	-0.641254	-0.358789	0.383932	-0.487221	-0.382256	-0.573941	-0.377904	0.355557	-0.73647	0.316691	0.354976	-0.399334	-0.306668	-0.287598	0.692561	0.320103	-0.159447	-0.399608	-0.472946	-0.597052	-0.0443509	-0.46565	-0.472572	0.474206	-0.520059	-0.0868719	0.134978	-0.442854	0.497226	0.126519	1
T_44492_c0_g2	MYB->MYB	gi|1012334787|gb|KYP46137.1| Zinc finger and SCAN domain-containing protein 29 [Cajanus cajan] 3.9e-63	GO:0003700, DNA binding transcription factor activity;GO:0005634, nucleus;GO:0005730, nucleolus;GO:0006351, transcription, DNA-templated;GO:0006355, regulation of transcription, DNA-templated;GO:0016592, mediator complex;GO:0043565, sequence-specific DNA binding	-	-0.0134027	-0.814155	-0.693896	-0.442259	0.197582	-0.547419	-0.193416	-0.596936	-0.0701074	0.0573004	-0.620245	0.133174	0.0168423	-0.397919	-0.217911	-0.392384	0.396756	0.329015	-0.202776	-0.419753	-0.342286	-0.552762	0.290199	-0.125615	-0.121903	0.41344	-0.613219	-0.559837	-0.152952	-0.285824	0.317354	-0.126953	1
T_36849_c0_g1	FAR1	gi|571457768|ref|XP_006580881.1| PREDICTED: ethylene-responsive transcription factor ERF114-like [Glycine max] 6.6e-77	GO:0003677, DNA binding;GO:0003700, DNA binding transcription factor activity;GO:0005634, nucleus;GO:0006351, transcription, DNA-templated;GO:0009873, ethylene-activated signaling pathway	-	0.0712736	0.283115	0.440293	-0.20632	0.333558	0.318241	-0.477626	-0.107321	-0.0671645	-0.535444	0.444136	-0.0745971	-0.369175	0.69626	0.132052	0.431742	-0.157649	0.167552	0.559892	0.66727	0.140612	0.382722	0.0685786	0.718955	0.546531	-0.0774866	0.247541	-0.17595	0.104458	0.075951	0.166571	0.00595639	1
T_43869_c1_g2	bHLH	gi|571465052|ref|XP_006583248.1| PREDICTED: uncharacterized protein LOC100809742 isoform X3 [Glycine max] 0.0e+00	GO:0003677, DNA binding;GO:0016779, nucleotidyltransferase activity;GO:0046872, metal ion binding	-	0.421437	0.187284	0.0121366	0.575328	0.555136	-0.0859289	-0.111185	0.0849628	-0.0834065	0.378932	-0.271768	0.27607	0.519719	-0.0241846	-0.242745	-0.165413	0.462567	0.192077	0.021268	-0.044417	-0.548029	0.173023	-0.281118	-0.166889	-0.295514	0.0379273	0.125861	0.57351	0.283821	0.285943	0.432111	0.723365	1
T_42176_c0_g1	AP2/ERF->AP2/ERF-ERF	gi|356536423|ref|XP_003536737.1| PREDICTED: transcription factor TCP7 [Glycine max] 1.4e-87	GO:0003677, DNA binding;GO:0003700, DNA binding transcription factor activity;GO:0005634, nucleus;GO:0006351, transcription, DNA-templated;GO:0006355, regulation of transcription, DNA-templated	-	0.217556	0.79167	0.691772	0.505454	0.0648484	0.395642	0.222736	0.664757	0.266187	-0.195996	0.538704	-0.254741	0.0975252	0.297482	0.135538	0.261812	-0.303296	-0.408782	0.117579	0.410512	0.193298	0.558734	-0.0525332	0.22595	0.343661	-0.474549	0.61907	0.50405	0.181573	0.400759	-0.058393	0.20823	1
T_40201_c1_g1	bHLH	gi|571483671|ref|XP_006589312.1| PREDICTED: DELLA protein RGA-like [Glycine max] 1.9e-235	GO:0000989, transcription factor activity, transcription factor binding;GO:0003700, DNA binding transcription factor activity;GO:0005634, nucleus;GO:0006351, transcription, DNA-templated;GO:0006355, regulation of transcription, DNA-templated;GO:0006808, regulation of nitrogen utilization;GO:0007275, multicellular organism development;GO:0009723, response to ethylene;GO:0009737, response to abscis…	K14494-ko04075 Plant hormone signal transduction	0.189416	0.634599	0.622165	0.13617	-0.220798	0.193057	0.381897	0.722959	0.638561	-0.537549	0.682759	-0.544597	-0.151619	0.300026	0.428228	0.0857966	-0.601145	-0.52511	0.0964559	0.367543	0.217475	0.689104	0.171076	0.571904	0.598087	-0.360393	0.43965	0.0200737	-0.31378	0.480918	-0.321898	-0.201663	1
T_40201_c1_g6	bHLH	gi|356510552|ref|XP_003524001.1| PREDICTED: DELLA protein DWARF8-like [Glycine max] 3.0e-241	GO:0000989, transcription factor activity, transcription factor binding;GO:0003700, DNA binding transcription factor activity;GO:0005634, nucleus;GO:0006351, transcription, DNA-templated;GO:0006355, regulation of transcription, DNA-templated;GO:0009723, response to ethylene;GO:0009737, response to abscisic acid;GO:0009740, gibberellic acid mediated signaling pathway;GO:0009863, salicylic acid med…	K14494-ko04075 Plant hormone signal transduction	0.0355436	0.463545	0.353912	0.306847	-0.200854	-0.0276345	0.580469	0.900966	0.632504	-0.448303	0.421641	-0.434695	0.278648	-0.0414046	0.239151	-0.127627	-0.526233	-0.568618	-0.212729	0.119844	0.109953	0.297256	0.124593	0.313521	0.267359	-0.375707	0.250135	0.0334725	-0.316697	0.338046	-0.225834	-0.00851495	1
T_42538_c1_g4	bHLH	gi|951020931|ref|XP_014512537.1| PREDICTED: WUSCHEL-related homeobox 8-like isoform X1 [Vigna radiata var. radiata] 7.5e-145	GO:0003677, DNA binding;GO:0003700, DNA binding transcription factor activity;GO:0005634, nucleus;GO:0006351, transcription, DNA-templated;GO:0007275, multicellular organism development	-	0.0971253	-0.668557	-0.625513	-0.322838	0.380934	-0.793576	-0.094533	-0.351197	0.0649423	-0.0420766	-0.680611	0.104143	0.423168	-0.526076	-0.161288	-0.546593	0.45572	0.0847534	-0.429666	-0.482604	-0.662741	-0.551308	-0.0222598	-0.281364	-0.352582	0.372351	-0.571506	-0.220591	-0.152203	-0.0716656	0.522023	0.0066426	1
T_44256_c1_g2	HB->HB-HD-ZIP	gi|571486107|ref|XP_006590185.1| PREDICTED: NAC domain-containing protein 78-like [Glycine max] 7.6e-14	GO:0003677, DNA binding;GO:0003700, DNA binding transcription factor activity;GO:0005634, nucleus;GO:0005737, cytoplasm;GO:0005789, endoplasmic reticulum membrane;GO:0006351, transcription, DNA-templated;GO:0006355, regulation of transcription, DNA-templated;GO:0009819, drought recovery;GO:0010150, leaf senescence;GO:0016021, integral component of membrane;GO:0045893, positive regulation of trans…	-	0.0685955	0.579415	0.358187	0.58388	0.0151105	0.192802	0.362719	0.725079	0.305558	0.00660291	0.235298	0.0805643	0.223511	0.0360575	0.0676964	-0.0011908	-0.252937	-0.501715	-0.112846	0.0816242	0.0979215	0.26491	-0.0728914	0.0766166	0.0368392	-0.382249	0.288088	0.401404	0.318635	0.327725	0.0377036	0.228007	1
T_41420_c0_g1	NAC	gi|947121882|gb|KRH70088.1| hypothetical protein GLYMA_02G067600 [Glycine max] 1.8e-97	GO:0003677, DNA binding;GO:0003700, DNA binding transcription factor activity;GO:0005634, nucleus;GO:0006351, transcription, DNA-templated;GO:0009739, response to gibberellin;GO:0009740, gibberellic acid mediated signaling pathway;GO:0009873, ethylene-activated signaling pathway;GO:0010030, positive regulation of seed germination	-	0.173874	0.00252465	-0.166074	0.247044	0.259021	-0.171946	-0.195128	-0.116148	-0.422992	0.553341	-0.426136	0.280004	0.534363	-0.259368	-0.380618	-0.196096	0.543896	0.0754356	-0.220042	-0.233987	-0.534129	-0.23681	-0.596926	-0.626864	-0.771425	-0.0367043	0.0384144	0.602078	0.252933	0.108108	0.285142	0.516826	1
T_43912_c0_g2	AP2/ERF->AP2/ERF-ERF	gi|571457018|ref|XP_006580553.1| PREDICTED: zinc finger CCCH domain-containing protein 1-like isoform X1 [Glycine max] 4.0e-62	GO:0003677, DNA binding;GO:0005684, U2-type spliceosomal complex;GO:0008270, zinc ion binding;GO:0034247, snoRNA splicing;GO:0045292, mRNA cis splicing, via spliceosome	-	0.0122891	-0.593938	-0.642895	0.0213157	0.258532	-0.369693	-0.187152	-0.515993	-0.498558	0.577193	-0.731732	0.565232	0.301281	-0.428385	-0.38899	-0.289903	0.538691	0.394769	-0.288294	-0.433793	-0.487213	-0.621564	-0.216267	-0.520699	-0.684799	0.380605	-0.391231	0.00989167	0.248067	-0.282174	0.439244	0.304791	1
T_44897_c0_g1	NAC	gi|571497915|ref|XP_003541381.2| PREDICTED: RNA polymerase I termination factor [Glycine max] 7.2e-165	GO:0003677, DNA binding;GO:0005654, nucleoplasm;GO:0005737, cytoplasm;GO:0006351, transcription, DNA-templated;GO:0006355, regulation of transcription, DNA-templated;GO:0007049, cell cycle	-	-0.47225	-0.784124	-0.664551	-0.592158	-0.20779	-0.58071	0.0841806	-0.428916	-0.0159038	0.0291142	-0.541071	0.178057	0.0355839	-0.570656	0.12207	-0.332214	0.0874382	0.00342709	-0.427654	-0.590898	-0.155535	-0.63814	0.0832257	-0.398787	-0.324752	0.589971	-0.674421	-0.459601	-0.215673	-0.500466	0.0666314	-0.518215	1
T_102082_c0_g1	MYB->MYB-related	gi|356569587|ref|XP_003552980.1| PREDICTED: DELLA protein GAI-like [Glycine max] 5.4e-06	GO:0000989, transcription factor activity, transcription factor binding;GO:0003700, DNA binding transcription factor activity;GO:0005634, nucleus;GO:0006351, transcription, DNA-templated;GO:0006355, regulation of transcription, DNA-templated;GO:0009723, response to ethylene;GO:0009737, response to abscisic acid;GO:0009740, gibberellic acid mediated signaling pathway;GO:0009863, salicylic acid med…	-	0.013295	0.358915	0.278041	0.463783	-0.241227	0.0245625	0.645293	0.755057	0.609802	-0.065561	0.291275	-0.488836	0.269342	-0.322128	0.119203	-0.133578	-0.340932	-0.465764	-0.23907	-0.0714241	0.0173963	0.260256	0.365012	-0.0292479	0.326459	-0.168441	0.332114	0.121303	-0.3473	0.12931	-0.359215	0.0122368	1
T_39077_c1_g10	AP2/ERF->AP2/ERF-ERF	gi|593268111|ref|XP_007136233.1| hypothetical protein PHAVU_009G029600g [Phaseolus vulgaris] 3.4e-118	GO:0003677, DNA binding;GO:0003700, DNA binding transcription factor activity;GO:0005634, nucleus;GO:0006351, transcription, DNA-templated;GO:0006970, response to osmotic stress;GO:0009409, response to cold;GO:0009414, response to water deprivation;GO:0009416, response to light stimulus;GO:0009611, response to wounding;GO:0009651, response to salt stress;GO:0009736, cytokinin-activated signaling …	-	-0.180447	0.417209	0.429822	0.0641144	-0.187742	0.057271	0.489908	0.783289	0.569999	-0.625147	0.516666	-0.425865	0.105083	0.101752	0.420228	0.0771949	-0.636972	-0.55008	-0.0599536	0.255111	0.276946	0.309353	0.163649	0.464802	0.425798	-0.272317	0.201233	-0.118596	-0.224985	0.0977367	-0.115775	-0.22184	1
T_43982_c3_g4	AP2/ERF->AP2/ERF-ERF	gi|356517102|ref|XP_003527229.1| PREDICTED: ethylene-responsive transcription factor 4-like [Glycine max] 1.8e-39	GO:0003677, DNA binding;GO:0003700, DNA binding transcription factor activity;GO:0005634, nucleus;GO:0006351, transcription, DNA-templated;GO:0009723, response to ethylene;GO:0009737, response to abscisic acid;GO:0009864, induced systemic resistance, jasmonic acid mediated signaling pathway;GO:0009873, ethylene-activated signaling pathway;GO:0010105, negative regulation of ethylene-activated sign…	-	0.0674379	0.111615	0.117913	-0.0544435	0.0166861	-0.201143	0.398805	0.555179	0.635979	-0.539574	0.229945	-0.436458	0.080445	0.107833	0.37677	-0.210185	-0.447802	-0.297746	-0.0539953	0.139467	0.105788	0.309102	0.442027	0.763875	0.53607	-0.096846	-0.0909022	-0.480159	-0.291911	0.248146	0.0369968	-0.119824	1
T_39193_c2_g2	Tify	gi|593796436|ref|XP_007161256.1| hypothetical protein PHAVU_001G0551000g, partial [Phaseolus vulgaris] 1.6e-78	GO:0003714, transcription corepressor activity;GO:0005634, nucleus;GO:0006351, transcription, DNA-templated;GO:0006355, regulation of transcription, DNA-templated;GO:0009611, response to wounding;GO:0031347, regulation of defense response;GO:1903507, negative regulation of nucleic acid-templated transcription;GO:2000022, regulation of jasmonic acid mediated signaling pathway	-	-0.0859716	-0.176946	-0.32726	0.219618	-0.093004	-0.121525	0.0906525	-0.0606462	-0.456797	0.513451	-0.358088	0.185812	0.5125	-0.321797	-0.29365	-0.117817	0.255178	0.193486	-0.361491	-0.267931	-0.0867892	-0.465975	-0.365748	-0.617119	-0.711237	0.0515168	-0.0519553	0.344357	0.0398918	-0.137919	-0.102211	0.343407	1
T_37533_c0_g1	MYB->MYB-related	gi|356518433|ref|XP_003527883.1| PREDICTED: uncharacterized protein LOC100799956 [Glycine max] 4.9e-256	GO:0000783, nuclear telomere cap complex;GO:0003691, double-stranded telomeric DNA binding;GO:0031627, telomeric loop formation	-	-0.169071	-0.430817	-0.50867	0.12576	0.287473	-0.640208	0.325797	0.0613699	0.183432	0.0598955	-0.628358	-0.0164277	0.826766	-0.652657	-0.0769973	-0.522277	0.319184	0.0131216	-0.518201	-0.565717	-0.524682	-0.479252	-0.114534	-0.410339	-0.488454	0.141892	-0.483846	0.0150736	-0.185934	-0.189514	0.432142	0.253688	1
T_41132_c0_g11	HB->HB-HD-ZIP	gi|593691079|ref|XP_007146109.1| hypothetical protein PHAVU_006G013200g [Phaseolus vulgaris] 6.7e-112	GO:0003700, DNA binding transcription factor activity;GO:0005634, nucleus;GO:0006351, transcription, DNA-templated;GO:0009637, response to blue light;GO:0030308, negative regulation of cell growth;GO:0043565, sequence-specific DNA binding;GO:0045893, positive regulation of transcription, DNA-templated;GO:0048510, regulation of timing of transition from vegetative to reproductive phase;GO:0048573,…	-	-0.0654944	-0.643082	-0.674533	-0.219047	0.104164	-0.302515	-0.412042	-0.690968	-0.575105	0.554057	-0.693183	0.656564	0.0746181	-0.272057	-0.377565	-0.266564	0.591322	0.490815	-0.107489	-0.426007	-0.418127	-0.528325	-0.30448	-0.489304	-0.733249	0.426511	-0.484449	-0.0712287	0.123016	-0.289005	0.264909	0.183083	1
T_44779_c1_g7	MYB->MYB-related	gi|955377722|ref|XP_014624828.1| PREDICTED: MYB transcription factor MYB180 isoform X2 [Glycine max] 2.5e-90	GO:0003677, DNA binding;GO:0005634, nucleus;GO:0005829, cytosol;GO:0006351, transcription, DNA-templated;GO:0006355, regulation of transcription, DNA-templated	-	-0.0685451	0.589735	0.675833	-0.0203041	0.0248636	0.296034	0.0175464	0.473413	0.329355	-0.692438	0.704971	-0.384612	-0.201326	0.510116	0.354789	0.395468	-0.460279	-0.314626	0.239244	0.648489	0.293868	0.465107	0.133906	0.651326	0.672689	-0.171127	0.430641	-0.0550479	-0.160287	0.21275	-0.135202	-0.176069	1
T_46711_c1_g6	NAC	gi|571524759|ref|XP_006598860.1| PREDICTED: NAC domain-containing protein 69-like [Glycine max] 3.1e-63	GO:0003677, DNA binding;GO:0005516, calmodulin binding;GO:0005634, nucleus;GO:0005789, endoplasmic reticulum membrane;GO:0005886, plasma membrane;GO:0006351, transcription, DNA-templated;GO:0006355, regulation of transcription, DNA-templated;GO:0016021, integral component of membrane;GO:0045892, negative regulation of transcription, DNA-templated;GO:0071470, cellular response to osmotic stress;GO…	-	0.0268275	-0.594657	-0.660584	-0.167717	0.291856	-0.648518	0.0484057	-0.169504	0.110945	0.123116	-0.710183	0.143692	0.38606	-0.378086	-0.111606	-0.600203	0.402157	0.170954	-0.40024	-0.452732	-0.319087	-0.357777	0.320716	0.078258	-0.140917	0.375572	-0.646863	-0.454664	-0.0992769	0.00826628	0.426255	0.160353	1
T_44763_c1_g1	C2C2->C2C2-GATA	gi|593786125|ref|XP_007156103.1| hypothetical protein PHAVU_003G258900g [Phaseolus vulgaris] 7.8e-90	GO:0000977, RNA polymerase II regulatory region sequence-specific DNA binding;GO:0001085, RNA polymerase II transcription factor binding;GO:0001228, transcriptional activator activity, RNA polymerase II transcription regulatory region sequence-specific DNA binding;GO:0003682, chromatin binding;GO:0003700, DNA binding transcription factor activity;GO:0005634, nucleus;GO:0005667, transcription fact…	-	0.0756112	0.558032	0.587833	0.282794	0.0575855	0.191047	0.33359	0.72126	0.466539	-0.581524	0.630141	-0.657933	0.248102	0.249751	0.23327	0.229025	-0.436068	-0.27192	0.134712	0.489679	0.170792	0.395742	0.137437	0.462739	0.521904	-0.361832	0.456711	0.100689	-0.301198	0.18524	-0.160117	0.104361	1
T_43183_c1_g7	GRAS	gi|356538516|ref|XP_003537749.1| PREDICTED: scarecrow-like protein 23 [Glycine max] 2.3e-233	GO:0003700, DNA binding transcription factor activity;GO:0005634, nucleus;GO:0006351, transcription, DNA-templated;GO:0006355, regulation of transcription, DNA-templated;GO:0043565, sequence-specific DNA binding;GO:0048366, leaf development;GO:0090610, bundle sheath cell fate specification	-	0.101161	0.627387	0.612193	0.48489	-0.306693	0.31497	0.533626	0.71968	0.482	-0.380159	0.651155	-0.587097	0.0828383	0.0487236	0.131838	0.189443	-0.475021	-0.312405	-0.0136428	0.287799	0.232435	0.438502	0.0583282	0.124155	0.390692	-0.458135	0.581801	0.238604	-0.440202	0.278265	-0.43295	0.0407591	1
T_46833_c0_g3	bHLH	gi|502164654|ref|XP_004513200.1| PREDICTED: transcription factor ORG2-like [Cicer arietinum] 5.1e-45	GO:0000977, RNA polymerase II regulatory region sequence-specific DNA binding;GO:0003677, DNA binding;GO:0003700, DNA binding transcription factor activity;GO:0006351, transcription, DNA-templated;GO:0006355, regulation of transcription, DNA-templated;GO:0006357, regulation of transcription by RNA polymerase II;GO:0010106, cellular response to iron ion starvation;GO:0055072, iron ion homeostasis;…	-	-0.0562127	-0.146494	-0.0571094	-0.221825	-0.0259201	-0.408483	0.368011	0.384336	0.683198	-0.725935	0.0913245	-0.277081	0.060027	-0.152526	0.310734	-0.299856	-0.325606	-0.312892	-0.253138	-0.0416894	-0.0528676	0.0613643	0.439737	0.474483	0.458853	0.0771288	-0.232603	-0.550959	-0.531522	0.0664905	0.125467	-0.333623	1
T_43122_c2_g8	NAC	gi|356545011|ref|XP_003540939.1| PREDICTED: NAC domain-containing protein 73-like [Glycine max] 1.4e-156	GO:0003677, DNA binding;GO:0003700, DNA binding transcription factor activity;GO:0005634, nucleus;GO:0006351, transcription, DNA-templated;GO:0006355, regulation of transcription, DNA-templated;GO:0044212, transcription regulatory region DNA binding;GO:0045893, positive regulation of transcription, DNA-templated;GO:2000652, regulation of secondary cell wall biogenesis	-	-0.112441	-0.661044	-0.667402	-0.313947	0.161752	-0.722337	0.11833	-0.0955053	0.065651	-0.0698726	-0.688187	0.172561	0.563323	-0.547326	-0.124341	-0.590839	0.392075	0.0332394	-0.456775	-0.550456	-0.416307	-0.527771	-0.112122	-0.265537	-0.526697	0.160403	-0.696117	-0.281456	-0.207491	-0.224175	0.590656	0.0499867	1
T_46260_c0_g3	C2H2	gi|734395692|gb|KHN29050.1| Zinc finger protein STOP1 like [Glycine soja] 1.6e-133	GO:0003676, nucleic acid binding;GO:0005634, nucleus;GO:0006351, transcription, DNA-templated;GO:0006355, regulation of transcription, DNA-templated;GO:0046872, metal ion binding	-	0.192331	0.0411854	0.130052	-0.261744	0.299494	-0.0402708	-0.12728	-0.0816628	0.188383	-0.327869	0.14945	-0.0644888	-0.311326	0.506854	0.44922	0.089696	-0.137628	0.0712842	0.25764	0.347605	0.105269	0.378458	0.2499	0.811271	0.545915	0.216385	-0.112247	-0.356766	0.0999386	0.228551	0.273542	-0.175443	1
T_43250_c0_g1	AP2/ERF->AP2/ERF-ERF	gi|356570638|ref|XP_003553492.1| PREDICTED: ethylene-responsive transcription factor ERF095-like [Glycine max] 1.5e-40	GO:0003677, DNA binding;GO:0003700, DNA binding transcription factor activity;GO:0005634, nucleus;GO:0006351, transcription, DNA-templated;GO:0006952, defense response	-	0.293529	-0.383836	-0.311744	-0.0457555	0.320401	-0.0832542	-0.472713	-0.857886	-0.661445	0.483315	-0.460443	0.207449	0.0535825	-0.131113	-0.446981	0.0391144	0.634019	0.608164	0.0352232	-0.164321	-0.38233	-0.391794	-0.403316	-0.598751	-0.509481	0.117884	-0.0585786	0.300623	0.221129	-0.105305	0.267544	0.282234	1
T_42689_c5_g1	MYB->MYB-related	gi|356559298|ref|XP_003547937.1| PREDICTED: TSL-kinase interacting protein 1-like [Glycine max] 0.0e+00	GO:0003677, DNA binding;GO:0003682, chromatin binding;GO:0005634, nucleus;GO:0006351, transcription, DNA-templated;GO:0006355, regulation of transcription, DNA-templated	-	-0.0492267	-0.574033	-0.588425	-0.025998	0.467458	-0.570719	-0.123139	-0.343435	-0.146103	0.21917	-0.74433	0.281138	0.675834	-0.504758	-0.257353	-0.409928	0.643226	0.312683	-0.259521	-0.502742	-0.642256	-0.483627	-0.221179	-0.531359	-0.584873	0.328985	-0.50038	0.125264	-0.0160112	-0.30952	0.587166	0.340946	1
T_40175_c0_g5	OFP	gi|356499022|ref|XP_003518343.1| PREDICTED: transcription repressor OFP1-like [Glycine max] 2.6e-174	GO:0003677, DNA binding;GO:0005634, nucleus;GO:0006351, transcription, DNA-templated;GO:0045892, negative regulation of transcription, DNA-templated	-	0.219734	-0.444054	-0.490639	0.0731806	0.52617	-0.590015	-0.213992	-0.435261	-0.11929	0.148312	-0.679348	0.28334	0.471718	-0.408432	-0.361916	-0.433673	0.631964	0.31192	-0.339617	-0.400058	-0.769468	-0.472339	-0.288502	-0.401087	-0.509447	0.260793	-0.387168	0.097319	-0.0217709	0.111077	0.543931	0.377399	1
T_44668_c1_g1	B3->B3-ARF	gi|356550817|ref|XP_003543780.1| PREDICTED: auxin response factor 17-like [Glycine max] 3.1e-129	GO:0000987, proximal promoter sequence-specific DNA binding;GO:0003677, DNA binding;GO:0003700, DNA binding transcription factor activity;GO:0005634, nucleus;GO:0006351, transcription, DNA-templated;GO:0006355, regulation of transcription, DNA-templated;GO:0009555, pollen development;GO:0009653, anatomical structure morphogenesis;GO:0009734, auxin-activated signaling pathway;GO:0010208, pollen wa…	-	0.184369	0.512662	0.352627	0.707746	0.207909	0.494408	0.0344285	0.272552	-0.179483	0.30235	0.218855	0.272898	0.147642	0.24782	-0.136536	0.31561	0.0643227	0.0330621	0.273833	0.238323	0.0482859	0.208823	-0.384146	-0.150635	-0.197058	-0.431746	0.397113	0.674494	0.50467	0.0721136	0.149654	0.483306	1
T_43422_c3_g5	HB->HB-other	gi|734417936|gb|KHN39244.1| Homeobox-leucine zipper protein ATHB-15 [Glycine soja] 1.4e-26	GO:0003677, DNA binding;GO:0005634, nucleus;GO:0006351, transcription, DNA-templated;GO:0006355, regulation of transcription, DNA-templated;GO:0008289, lipid binding;GO:0030154, cell differentiation	-	0.117614	0.692727	0.499936	0.672348	0.261236	0.47674	-0.135207	0.342105	-0.278226	0.333912	0.272829	0.105743	0.30588	0.292149	-0.180416	0.349371	0.11798	-0.0350591	0.194132	0.383024	-0.0478696	0.268543	-0.368629	-0.151995	-0.150228	-0.279658	0.614821	0.795539	0.396559	0.194441	-0.0517465	0.6003	1
T_42248_c1_g1	MYB->MYB	gi|356496114|ref|XP_003516915.1| PREDICTED: myb protein-like [Glycine max] 1.1e-175	GO:0003677, DNA binding;GO:0003700, DNA binding transcription factor activity;GO:0005634, nucleus;GO:0006351, transcription, DNA-templated;GO:0009414, response to water deprivation;GO:0009651, response to salt stress;GO:0009723, response to ethylene;GO:0009733, response to auxin;GO:0009737, response to abscisic acid;GO:0009738, abscisic acid-activated signaling pathway;GO:0009739, response to gib…	-	-0.0319002	-0.358071	-0.356099	0.0770275	0.563273	-0.355583	-0.280531	-0.329037	-0.306147	0.208078	-0.551345	0.16011	0.682486	-0.293109	-0.378462	-0.15994	0.733106	0.436198	-0.0722703	-0.210033	-0.590369	-0.4705	-0.370812	-0.469818	-0.551193	0.211863	-0.302635	0.243018	0.0286087	-0.284415	0.567539	0.524519	1
T_42543_c3_g4	NF-Y->NF-YA	gi|356547917|ref|XP_003542351.1| PREDICTED: nuclear transcription factor Y subunit A-3 isoform X1 [Glycine max] 1.5e-107	GO:0003677, DNA binding;GO:0003700, DNA binding transcription factor activity;GO:0006351, transcription, DNA-templated;GO:0016602, CCAAT-binding factor complex	-	-0.276425	-0.735736	-0.601788	-0.478138	0.257961	-0.455954	-0.290017	-0.507289	-0.271255	0.061739	-0.592998	0.0195515	0.369648	-0.452432	-0.264919	-0.270183	0.462074	0.281342	-0.158292	-0.359438	-0.395542	-0.584075	0.130073	-0.39161	-0.315932	0.281861	-0.433254	-0.279251	-0.198517	-0.614384	0.313019	-0.00118073	1
T_40122_c3_g7	AP2/ERF->AP2/ERF-ERF	gi|947077402|gb|KRH26242.1| hypothetical protein GLYMA_12G162700 [Glycine max] 6.7e-30	GO:0003677, DNA binding;GO:0003700, DNA binding transcription factor activity;GO:0005634, nucleus;GO:0006351, transcription, DNA-templated;GO:0009723, response to ethylene;GO:0009737, response to abscisic acid;GO:0009864, induced systemic resistance, jasmonic acid mediated signaling pathway;GO:0009873, ethylene-activated signaling pathway;GO:0010105, negative regulation of ethylene-activated sign…	-	0.147068	0.194567	0.202697	0.0443687	0.0667337	-0.167935	0.390217	0.581266	0.566315	-0.52293	0.275625	-0.378017	0.141587	0.141213	0.368433	-0.148534	-0.46058	-0.265439	-0.0275809	0.201499	0.0212819	0.360431	0.279164	0.714444	0.450244	-0.0894798	0.0207853	-0.317656	-0.234897	0.279141	0.104994	-0.0186801	1
T_37704_c0_g1	bHLH	gi|571434393|ref|XP_006573184.1| PREDICTED: transcription factor bHLH49-like isoform X1 [Glycine max] 8.7e-281	GO:0003677, DNA binding;GO:0003700, DNA binding transcription factor activity;GO:0005634, nucleus;GO:0006351, transcription, DNA-templated;GO:0006355, regulation of transcription, DNA-templated;GO:0040008, regulation of growth	-	0.16233	0.024156	-0.159313	0.57939	0.397884	0.0252215	-0.200413	-0.0488426	-0.367064	0.479447	-0.342657	0.408138	0.541403	-0.174136	-0.562312	-0.0820032	0.502457	0.303628	-0.00953729	-0.134069	-0.429253	-0.25873	-0.37451	-0.504725	-0.587497	-0.120538	0.0750391	0.549501	0.311292	-0.0280387	0.265848	0.756359	1
T_39034_c2_g3	AP2/ERF->AP2/ERF-ERF	gi|351724471|ref|NP_001235779.1| dehydration responsive element binding protein [Glycine max] 1.2e-64	GO:0003677, DNA binding;GO:0003700, DNA binding transcription factor activity;GO:0005634, nucleus;GO:0006351, transcription, DNA-templated;GO:0009409, response to cold;GO:0009414, response to water deprivation;GO:0009873, ethylene-activated signaling pathway;GO:0045893, positive regulation of transcription, DNA-templated	-	-0.0192918	-0.479795	-0.39339	-0.473427	0.0875065	-0.725928	0.272589	-0.0112965	0.452551	-0.471173	-0.351221	0.0960451	0.100017	-0.278905	0.418004	-0.465239	-0.145279	-0.249175	-0.391367	-0.378773	-0.228448	-0.172635	0.0501792	0.226584	-0.0112236	0.357457	-0.648918	-0.456528	-0.109731	0.0588617	0.518511	-0.433378	1
T_39034_c2_g5	AP2/ERF->AP2/ERF-ERF	gi|356514220|ref|XP_003525804.1| PREDICTED: ethylene-responsive transcription factor ERF010-like [Glycine max] 2.2e-67	GO:0003677, DNA binding;GO:0003700, DNA binding transcription factor activity;GO:0005634, nucleus;GO:0006351, transcription, DNA-templated;GO:0009873, ethylene-activated signaling pathway	-	-0.115067	0.0613612	0.0800828	-0.279921	-0.215216	-0.0857455	0.298909	0.406322	0.641439	-0.737497	0.270084	-0.147671	-0.293065	0.117824	0.383649	-0.152038	-0.544755	-0.527647	-0.0509288	0.00766675	0.36189	0.198008	0.343462	0.561317	0.466858	-0.360419	-0.212999	-0.477222	-0.163748	0.166852	-0.0173293	-0.528861	1
T_38464_c1_g1	FAR1	gi|947084696|gb|KRH33417.1| hypothetical protein GLYMA_10G121700 [Glycine max] 5.5e-247	GO:0005634, nucleus;GO:0006355, regulation of transcription, DNA-templated;GO:0008270, zinc ion binding	-	0.280803	-0.0876128	-0.289806	0.45288	0.454836	-0.180237	-0.301379	-0.166759	-0.302801	0.499619	-0.462591	0.260707	0.536646	-0.27011	-0.659069	-0.257577	0.679427	0.276225	-0.167295	-0.200796	-0.593247	-0.388917	-0.23873	-0.519912	-0.536717	-0.0421309	0.0034185	0.428997	0.131549	0.150912	0.164524	0.703267	1
T_45971_c1_g2	Tify	gi|356498448|ref|XP_003518064.1| PREDICTED: transcription factor bHLH48-like [Glycine max] 2.4e-93	GO:0003677, DNA binding;GO:0003700, DNA binding transcription factor activity;GO:0005634, nucleus;GO:0006351, transcription, DNA-templated;GO:0006355, regulation of transcription, DNA-templated	-	0.175531	0.627247	0.660152	0.525503	0.111779	0.612589	-0.0114534	0.433664	-0.0247229	-0.144926	0.648806	-0.465764	0.0977264	0.423975	-0.195434	0.51244	-0.0707608	0.203964	0.464783	0.691913	0.225864	0.404945	0.0861351	0.294046	0.440797	-0.399999	0.70934	0.269345	-0.15963	0.0355918	-0.216273	0.491668	1
T_34851_c0_g1	zn-clus	gi|955304813|ref|XP_003517135.2| PREDICTED: uncharacterized protein LOC100795946 [Glycine max] 1.0e-158	GO:0003677, DNA binding;GO:0003700, DNA binding transcription factor activity;GO:0005634, nucleus;GO:0006351, transcription, DNA-templated;GO:0006355, regulation of transcription, DNA-templated	-	-0.231682	-0.541638	-0.48773	-0.468114	0.10118	-0.505279	-0.00403547	-0.0850763	0.332921	-0.343539	-0.369194	0.0563121	-0.0141544	-0.242078	0.0668983	-0.462737	0.00272779	-0.0924335	-0.199136	-0.295296	-0.175984	-0.254835	0.492278	0.364184	0.174577	0.210048	-0.603183	-0.78913	-0.249664	-0.164303	0.271576	-0.267099	1
T_41069_c0_g1	Trihelix	gi|356575994|ref|XP_003556120.1| PREDICTED: scarecrow-like protein 8 [Glycine max] 2.0e-249	GO:0003700, DNA binding transcription factor activity;GO:0005634, nucleus;GO:0005737, cytoplasm;GO:0006351, transcription, DNA-templated;GO:0006355, regulation of transcription, DNA-templated;GO:0043565, sequence-specific DNA binding	-	-0.0129812	0.375078	0.3341	0.00436449	0.187557	-0.0912526	0.250332	0.549742	0.682577	-0.556518	0.257179	-0.325601	0.0403633	0.267371	0.50235	-0.100985	-0.410859	-0.453317	0.0437726	0.178188	0.155781	0.523929	0.35187	0.770232	0.637402	-0.0881657	-0.0358351	-0.206592	0.0323734	0.396573	0.123118	-0.120835	1
T_39776_c3_g3	NAC	gi|356544962|ref|XP_003540915.1| PREDICTED: transcription factor bHLH36-like [Glycine max] 1.0e-76	GO:0000977, RNA polymerase II regulatory region sequence-specific DNA binding;GO:0003677, DNA binding;GO:0003700, DNA binding transcription factor activity;GO:0006351, transcription, DNA-templated;GO:0006355, regulation of transcription, DNA-templated;GO:0006357, regulation of transcription by RNA polymerase II;GO:0090575, RNA polymerase II transcription factor complex	-	0.0526621	-0.738966	-0.649585	-0.446261	-0.149096	-0.308616	-0.164686	-0.547828	-0.334863	0.252679	-0.494756	0.373646	-0.0583099	-0.311747	-0.2343	-0.249573	0.360735	0.328468	-0.0873256	-0.433968	-0.0996829	-0.463481	-0.109308	-0.456758	-0.500629	0.221817	-0.495573	-0.194283	-0.0533112	-0.382893	0.189826	-0.170634	1
T_43304_c2_g2	CSD	gi|593488227|ref|XP_007140981.1| hypothetical protein PHAVU_008G157200g [Phaseolus vulgaris] 2.4e-76	GO:0003677, DNA binding;GO:0005634, nucleus;GO:0005737, cytoplasm;GO:0006351, transcription, DNA-templated;GO:0006355, regulation of transcription, DNA-templated;GO:0009554, megasporogenesis;GO:0009556, microsporogenesis;GO:0030154, cell differentiation;GO:0046872, metal ion binding;GO:0048653, anther development	-	-0.368152	-0.522276	-0.553775	-0.128921	-0.74338	-0.241713	0.499089	-0.042791	0.0163222	0.235359	-0.317345	0.171214	-0.0754872	-0.678906	-0.0955118	-0.32543	-0.194287	-0.127826	-0.605583	-0.644088	0.259458	-0.568832	0.19191	-0.57478	-0.358505	0.154016	-0.35578	-0.337101	-0.319963	-0.318245	-0.436222	-0.428484	1
T_42677_c0_g1	bZIP	gi|356559849|ref|XP_003548209.1| PREDICTED: heat stress transcription factor B-2a-like [Glycine max] 2.2e-41	GO:0003700, DNA binding transcription factor activity;GO:0005634, nucleus;GO:0006351, transcription, DNA-templated;GO:0043565, sequence-specific DNA binding	-	0.193721	0.366573	0.317175	0.0122465	0.228839	0.0378322	0.137653	0.529484	0.45578	-0.318929	0.269033	-0.135355	-0.0651732	0.405396	0.419534	-0.0291109	-0.300714	-0.373047	0.175725	0.318487	0.17899	0.577989	0.362985	0.835338	0.593275	-0.0990541	0.0615693	-0.171893	0.227494	0.345856	0.264914	-0.0270928	1
T_44551_c3_g4	B3->B3-ARF	gi|950975352|ref|XP_014501082.1| PREDICTED: LOB domain-containing protein 25-like [Vigna radiata var. radiata] 2.4e-81	GO:0010199, organ boundary specification between lateral organs and the meristem	-	-0.246374	-0.319394	-0.377429	0.0204593	-0.760003	-0.0964447	0.527225	0.0782892	-0.0227677	0.224234	-0.17507	0.040818	-0.0280382	-0.528505	-0.148456	-0.215554	-0.17321	-0.0537579	-0.561504	-0.467871	0.421959	-0.435256	0.161446	-0.495882	-0.274324	0.0319368	-0.182534	-0.217866	-0.355336	-0.155432	-0.510686	-0.263745	1
T_41708_c0_g1	bZIP	gi|593688603|ref|XP_007144936.1| hypothetical protein PHAVU_007G195900g [Phaseolus vulgaris] 5.0e-54	GO:0003700, DNA binding transcription factor activity;GO:0005634, nucleus;GO:0006351, transcription, DNA-templated;GO:0006355, regulation of transcription, DNA-templated;GO:0043565, sequence-specific DNA binding	-	-0.138146	-0.668333	-0.73204	-0.129012	-0.339394	-0.348199	0.306196	-0.237298	0.0127738	0.197773	-0.53552	0.471863	-0.110272	-0.570697	-0.152435	-0.439346	0.0192619	-0.0571205	-0.509691	-0.678811	0.0813418	-0.634538	0.163394	-0.430607	-0.40073	0.0135131	-0.582719	-0.369189	0.00582712	-0.240482	0.0472016	-0.340325	1
T_42109_c1_g5	AP2/ERF->AP2/ERF-ERF	gi|734383926|gb|KHN24171.1| NAC domain-containing protein 74 [Glycine soja] 9.5e-14	GO:0003677, DNA binding;GO:0003700, DNA binding transcription factor activity;GO:0005634, nucleus;GO:0006351, transcription, DNA-templated;GO:0006355, regulation of transcription, DNA-templated;GO:0016021, integral component of membrane;GO:0090602, sieve element enucleation;GO:0090603, sieve element differentiation	-	0.25696	-0.270444	-0.468011	0.183204	0.233839	-0.408798	-0.0612523	-0.238314	-0.267879	0.484961	-0.668832	0.45658	0.409405	-0.322541	-0.290807	-0.496759	0.522572	0.188027	-0.414968	-0.435552	-0.561019	-0.236948	-0.372212	-0.371219	-0.700528	0.0867865	-0.272193	0.202103	0.0875896	0.25942	0.405341	0.438622	1
T_39790_c4_g1	HB->HB-HD-ZIP	gi|734361876|gb|KHN15835.1| Trihelix transcription factor GT-2 [Glycine soja] 1.4e-150	GO:0003677, DNA binding;GO:0003700, DNA binding transcription factor activity;GO:0005634, nucleus;GO:0006351, transcription, DNA-templated	-	0.0220855	-0.280764	-0.216961	-0.260901	0.645613	-0.377341	-0.213244	-0.206449	0.0692498	-0.165689	-0.365411	0.262038	0.222256	0.0417945	0.222662	-0.142801	0.336039	0.018883	0.0638297	-0.0631576	-0.374321	-0.0722636	-0.0750714	0.187653	-0.0323064	0.241393	-0.433816	-0.0606813	0.331485	-0.152881	0.86006	-0.00380437	1
T_43531_c0_g1	TCP	gi|734422233|gb|KHN41529.1| Transcription factor MYB48 [Glycine soja] 5.0e-97	GO:0003677, DNA binding;GO:0005634, nucleus;GO:0006351, transcription, DNA-templated;GO:0006355, regulation of transcription, DNA-templated	-	-0.147513	-0.534126	-0.629925	-0.308896	-0.120944	-0.686123	0.312474	-0.10423	0.166231	0.199334	-0.682393	0.436531	0.194806	-0.61071	0.234786	-0.609934	0.0576468	-0.39479	-0.661273	-0.787651	-0.248546	-0.387572	-0.105213	-0.422774	-0.519044	0.338985	-0.664432	-0.0882733	0.182763	-0.0243961	0.342985	-0.393207	1
T_43926_c1_g2	AP2/ERF->AP2/ERF-ERF	gi|734394446|gb|KHN28520.1| Cellulose synthase A catalytic subunit 1 [UDP-forming] [Glycine soja] 5.7e-156	GO:0003677, DNA binding;GO:0003690, double-stranded DNA binding;GO:0003700, DNA binding transcription factor activity;GO:0005634, nucleus;GO:0006351, transcription, DNA-templated;GO:0008270, zinc ion binding;GO:0009585, red, far-red light phototransduction;GO:0009737, response to abscisic acid;GO:0009740, gibberellic acid mediated signaling pathway;GO:0010017, red or far-red light signaling pathw…	-	0.00306376	-0.446017	-0.553502	-0.170197	-0.363677	-0.454693	0.319184	-0.0583809	0.180867	0.242264	-0.546411	0.414305	-0.0584641	-0.623807	-0.0804618	-0.56448	0.141577	-0.361792	-0.621905	-0.748982	-0.0189368	-0.368674	0.0675963	-0.512531	-0.378638	0.0849335	-0.510799	-0.129278	0.0558006	0.0794052	0.125116	-0.369115	1
T_43289_c0_g3	GRAS	gi|593785507|ref|XP_007155794.1| hypothetical protein PHAVU_003G232300g [Phaseolus vulgaris] 3.5e-142	GO:0003677, DNA binding;GO:0003700, DNA binding transcription factor activity;GO:0005634, nucleus;GO:0006351, transcription, DNA-templated;GO:0007275, multicellular organism development;GO:0009751, response to salicylic acid	-	-0.239245	-0.485658	-0.433374	-0.325459	0.238856	-0.717315	0.088923	-0.130531	0.203075	-0.134088	-0.495183	0.176518	0.44455	-0.463374	0.289164	-0.429984	0.0646266	-0.127882	-0.340854	-0.485768	-0.641963	-0.274988	-0.201734	-0.223721	-0.381942	0.547309	-0.520886	-0.0845261	-0.112508	-0.236678	0.433137	-0.175357	1
T_41055_c2_g3	LOB	gi|356539056|ref|XP_003538016.1| PREDICTED: transcription factor MYB59-like [Glycine max] 4.6e-60	GO:0003677, DNA binding;GO:0003700, DNA binding transcription factor activity;GO:0005634, nucleus;GO:0006351, transcription, DNA-templated;GO:0009723, response to ethylene;GO:0009739, response to gibberellin;GO:0009751, response to salicylic acid;GO:0009753, response to jasmonic acid;GO:0010200, response to chitin;GO:0046686, response to cadmium ion	-	-0.374745	-0.604638	-0.593843	-0.292566	-0.134627	-0.555093	0.207548	-0.103518	0.0102318	-0.0403191	-0.522796	0.200371	0.328105	-0.651263	-0.145298	-0.361316	0.182725	-0.147724	-0.581386	-0.558502	-0.113518	-0.817057	-0.0790359	-0.541974	-0.49477	0.193426	-0.59939	-0.238481	-0.101558	-0.368269	0.228682	-0.25586	1
T_38938_c2_g1	MADS->MADS-MIKC	gi|1012347884|gb|KYP59075.1| Transcription factor MYB86 [Cajanus cajan] 3.1e-129	GO:0003677, DNA binding;GO:0005634, nucleus;GO:0006351, transcription, DNA-templated;GO:0006355, regulation of transcription, DNA-templated	-	-0.0790236	-0.286947	-0.219416	-0.290711	0.575739	-0.36153	-0.234526	-0.243132	-0.0338792	-0.265527	-0.320226	0.243793	0.243358	0.0357443	0.164665	-0.102313	0.226536	0.0311104	0.0383013	-0.045089	-0.400009	-0.225711	-0.287921	0.126279	-0.219667	0.0826519	-0.421878	-0.0737838	0.277531	-0.18857	0.790334	-0.00630627	1
T_35434_c0_g1	AP2/ERF->AP2/ERF-ERF	gi|1012356239|gb|KYP67425.1| ZF-HD homeobox protein At4g24660 family [Cajanus cajan] 6.6e-60	GO:0003677, DNA binding;GO:0005634, nucleus;GO:0006351, transcription, DNA-templated;GO:0006355, regulation of transcription, DNA-templated;GO:0009793, embryo development ending in seed dormancy;GO:0042803, protein homodimerization activity;GO:0046872, metal ion binding	-	0.0334792	0.499749	0.553739	0.0991804	-0.273756	0.172066	0.325079	0.522699	0.589833	-0.420226	0.605606	-0.443032	-0.276596	0.231111	0.440847	0.151763	-0.573723	-0.338521	0.104917	0.303181	0.251607	0.635316	0.347241	0.519477	0.724964	0.120152	0.364804	-0.0989969	-0.326971	0.341478	-0.446187	-0.264191	1
T_43907_c3_g1	AP2/ERF->AP2/ERF-ERF	gi|571440413|ref|XP_006575148.1| PREDICTED: transcription factor LUX-like [Glycine max] 3.7e-43	GO:0003677, DNA binding;GO:0005634, nucleus;GO:0006351, transcription, DNA-templated;GO:0006355, regulation of transcription, DNA-templated;GO:0007623, circadian rhythm;GO:0042753, positive regulation of circadian rhythm	-	0.25658	0.708704	0.568212	0.684546	-0.178583	0.410174	0.256011	0.526354	0.0360217	0.0184685	0.483018	-0.159413	0.120738	0.190906	-0.120472	0.247249	-0.17648	-0.0749918	-0.0098025	0.341821	0.136367	0.357438	-0.29998	-0.0392169	0.014238	-0.372651	0.640444	0.537507	-0.113544	0.461002	-0.32815	0.399474	1
T_44927_c1_g2	AP2/ERF->AP2/ERF-ERF	gi|356553960|ref|XP_003545318.1| PREDICTED: NAC domain-containing protein 30-like [Glycine max] 1.8e-127	GO:0003677, DNA binding;GO:0003700, DNA binding transcription factor activity;GO:0005634, nucleus;GO:0006351, transcription, DNA-templated;GO:0006355, regulation of transcription, DNA-templated;GO:0007275, multicellular organism development;GO:0009620, response to fungus;GO:0009733, response to auxin;GO:0009735, response to cytokinin;GO:0009737, response to abscisic acid;GO:0009741, response to b…	-	-0.000446319	-0.0348746	0.116964	-0.344889	0.301078	-0.136767	-0.0527088	0.0860411	0.381993	-0.71211	0.147047	-0.102673	-0.122677	0.326272	0.368159	0.0436098	-0.16369	-0.0774579	0.212733	0.247884	0.150499	0.24154	0.267175	0.681315	0.552648	0.0462872	-0.235244	-0.38748	-0.0010384	0.0178255	0.444974	-0.240472	1
T_43009_c5_g5	HSF	gi|356559849|ref|XP_003548209.1| PREDICTED: heat stress transcription factor B-2a-like [Glycine max] 4.0e-40	GO:0003700, DNA binding transcription factor activity;GO:0005634, nucleus;GO:0006351, transcription, DNA-templated;GO:0010200, response to chitin;GO:0043565, sequence-specific DNA binding	-	0.132281	0.33677	0.342057	-0.117672	0.230271	0.12121	-0.0333547	0.373111	0.306583	-0.339461	0.312971	-0.16321	-0.173425	0.523228	0.380367	0.0977063	-0.237425	-0.236093	0.280428	0.442443	0.26049	0.551317	0.38414	0.883079	0.656002	-0.0429609	0.0866894	-0.248461	0.188844	0.265104	0.212849	-0.0523044	1
T_40067_c1_g5	TCP	gi|593267519|ref|XP_007135937.1| hypothetical protein PHAVU_009G004300g [Phaseolus vulgaris] 2.1e-84	GO:0003677, DNA binding;GO:0005634, nucleus;GO:0007275, multicellular organism development;GO:0009734, auxin-activated signaling pathway;GO:0009851, auxin biosynthetic process;GO:0046872, metal ion binding	-	0.0138456	-0.573691	-0.614952	-0.380895	0.103408	-0.716049	-0.102329	-0.361754	-0.00473512	0.257761	-0.691542	0.330572	0.191036	-0.575356	-0.0701201	-0.559565	0.286466	-0.202874	-0.494207	-0.664342	-0.551867	-0.494482	-0.112753	-0.497834	-0.505963	0.463071	-0.538147	-0.0395873	0.157473	0.017184	0.255031	-0.219067	1
T_40707_c0_g1	MYB->MYB	gi|356576737|ref|XP_003556486.1| PREDICTED: mediator-associated protein 1-like [Glycine max] 4.8e-84	GO:0005730, nucleolus;GO:0005829, cytosol;GO:0006355, regulation of transcription, DNA-templated;GO:0009507, chloroplast;GO:0016592, mediator complex	-	0.296177	0.463251	0.47907	-0.0351141	-0.0115028	0.054725	0.144456	0.538797	0.427906	-0.595902	0.552555	-0.376746	-0.104253	0.461068	0.330606	0.0994497	-0.347628	-0.281378	0.142417	0.494764	0.165514	0.490887	0.00220629	0.708682	0.465227	-0.219805	0.22844	-0.0940206	-0.235702	0.501611	-0.0174941	-0.083551	1
T_39563_c0_g3	MYB->MYB-related	gi|571457007|ref|XP_006580551.1| PREDICTED: probable WRKY transcription factor 29 [Glycine max] 1.2e-127	GO:0003700, DNA binding transcription factor activity;GO:0005634, nucleus;GO:0006351, transcription, DNA-templated;GO:0006952, defense response;GO:0010200, response to chitin;GO:0043565, sequence-specific DNA binding	-	0.334188	0.322541	0.465647	0.0764734	0.333693	0.336011	-0.278672	-0.0284082	0.159334	-0.396726	0.396504	-0.421307	-0.224411	0.439929	-0.0804159	0.287829	0.0722332	0.206886	0.495924	0.507716	0.0764539	0.505876	0.326319	0.480106	0.71141	-0.293595	0.3946	-0.0314237	-0.141424	0.182026	0.0708203	0.171079	1
T_44047_c2_g2	TCP	gi|356556817|ref|XP_003546717.1| PREDICTED: protein LATERAL ROOT PRIMORDIUM 1-like [Glycine max] 3.0e-125	GO:0003677, DNA binding;GO:0005634, nucleus;GO:0007275, multicellular organism development;GO:0009734, auxin-activated signaling pathway;GO:0009851, auxin biosynthetic process;GO:0042803, protein homodimerization activity;GO:0046872, metal ion binding	-	0.0551531	0.442125	0.506218	0.0444805	0.434629	0.0271539	-0.0566361	0.327913	0.425043	-0.734091	0.410325	-0.230755	0.123896	0.441975	0.423963	0.160064	-0.275524	-0.171787	0.31968	0.428459	-0.197493	0.548802	-0.15137	0.603596	0.401879	-0.158781	0.191778	0.119136	-0.0829703	0.235056	0.306116	0.056578	1
T_42071_c1_g4	C2H2	gi|356552929|ref|XP_003544814.1| PREDICTED: transcription factor bHLH96-like [Glycine max] 3.7e-144	GO:0003677, DNA binding;GO:0003700, DNA binding transcription factor activity;GO:0005634, nucleus;GO:0006351, transcription, DNA-templated;GO:0008152, metabolic process;GO:0016597, amino acid binding	-	0.164667	0.693817	0.692463	0.4839	-0.227246	0.653329	0.246394	0.363975	0.198171	-0.191065	0.680579	-0.369907	-0.272911	0.479235	0.171755	0.435741	-0.371018	0.0653339	0.393679	0.465094	0.483463	0.704279	0.00108969	0.358107	0.486103	-0.453977	0.576179	0.241269	-0.140535	0.310321	-0.381146	0.139016	1
T_41953_c2_g4	MYB->MYB	gi|356558147|ref|XP_003547369.1| PREDICTED: dof zinc finger protein DOF3.6-like [Glycine max] 6.0e-114	GO:0003677, DNA binding;GO:0005634, nucleus;GO:0006351, transcription, DNA-templated;GO:0006355, regulation of transcription, DNA-templated;GO:0046872, metal ion binding	-	0.0723242	-0.583498	-0.578125	-0.383508	0.451339	-0.667862	-0.26094	-0.384451	-0.00810237	0.0903076	-0.720096	0.350107	0.301567	-0.293565	-0.0575401	-0.49727	0.489655	0.093828	-0.186428	-0.459134	-0.530762	-0.302286	-0.0563144	-0.110131	-0.332581	0.440243	-0.664423	-0.164291	0.212073	-0.0447526	0.66938	0.0524895	1
T_45411_c0_g2	TUB	gi|255638864|gb|ACU19735.1| unknown [Glycine max] 3.2e-74	GO:0002376, immune system process;GO:0003700, DNA binding transcription factor activity;GO:0005634, nucleus;GO:0005789, endoplasmic reticulum membrane;GO:0006351, transcription, DNA-templated;GO:0010200, response to chitin;GO:0016021, integral component of membrane;GO:0030968, endoplasmic reticulum unfolded protein response;GO:0043565, sequence-specific DNA binding	-	0.0880248	0.106417	0.294367	-0.446568	-0.0878096	0.316738	-0.254603	-0.153826	-0.0269698	-0.342574	0.421113	-0.138404	-0.674948	0.636458	0.292312	0.372364	-0.215308	0.123898	0.470248	0.516282	0.516371	0.406574	0.28114	0.723199	0.63705	0.0466908	0.0781233	-0.420528	0.0262612	0.0518287	-0.0344076	-0.350033	1
T_40075_c0_g1	TCP	gi|356549707|ref|XP_003543233.1| PREDICTED: squamosa promoter-binding protein 1-like [Glycine max] 3.3e-63	GO:0003677, DNA binding;GO:0003700, DNA binding transcription factor activity;GO:0005634, nucleus;GO:0005737, cytoplasm;GO:0006351, transcription, DNA-templated;GO:0006355, regulation of transcription, DNA-templated;GO:0009908, flower development;GO:0010321, regulation of vegetative phase change;GO:0046872, metal ion binding	-	-0.411805	-0.288103	-0.414693	-0.00464559	-0.175756	-0.265006	0.0387404	-0.116174	-0.295671	0.280185	-0.418591	0.353767	0.416932	-0.354244	-0.16362	-0.164212	0.297939	0.11997	-0.416045	-0.384354	-0.0508875	-0.575386	-0.40728	-0.617642	-0.708883	0.290243	-0.364655	0.167751	-0.0942233	-0.216453	-0.0900151	0.0920421	1
T_39042_c2_g1	AP2/ERF->AP2/ERF-ERF	gi|908212354|tpg|DAA64920.1| TPA_inf: dof protein [Cajanus cajan] 1.0e-214	GO:0003677, DNA binding;GO:0003700, DNA binding transcription factor activity;GO:0005634, nucleus;GO:0006351, transcription, DNA-templated;GO:0006355, regulation of transcription, DNA-templated;GO:0009908, flower development;GO:0046872, metal ion binding	-	-0.192099	-0.59753	-0.629765	-0.10051	-0.194099	-0.216381	0.0384609	-0.273813	-0.308732	0.393811	-0.533418	0.267329	0.186933	-0.527956	-0.4944	-0.234686	0.376128	0.18782	-0.297175	-0.506122	0.0901416	-0.789557	-0.00246164	-0.636798	-0.548322	0.0126156	-0.477085	-0.154137	0.0979154	-0.419759	0.0601084	0.0300855	1
T_44376_c2_g1	MYB->MYB-related	gi|571478149|ref|XP_006587481.1| PREDICTED: uncharacterized protein LOC778073 isoform X2 [Glycine max] 0.0e+00	GO:0003677, DNA binding;GO:0005634, nucleus;GO:0006351, transcription, DNA-templated;GO:0006355, regulation of transcription, DNA-templated	-	-0.387885	-0.678339	-0.680708	-0.258636	0.267968	-0.543375	-0.029016	-0.322415	-0.114786	0.160353	-0.719786	0.43278	0.406817	-0.548271	-0.0465535	-0.379682	0.346095	0.00913631	-0.355975	-0.572601	-0.425403	-0.652214	-0.0643234	-0.454012	-0.534203	0.317117	-0.639621	-0.149193	0.145257	-0.544774	0.534899	-0.083369	1
T_40835_c1_g2	FAR1	gi|734330186|gb|KHN06651.1| Protein lin-54 like [Glycine soja] 4.1e-264	GO:0003700, DNA binding transcription factor activity;GO:0005634, nucleus;GO:0009934, regulation of meristem structural organization;GO:0046872, metal ion binding;GO:0048444, floral organ morphogenesis;GO:0051302, regulation of cell division	-	0.0370542	-0.314792	-0.50749	0.162652	-0.166766	-0.129334	-0.0775993	-0.229257	-0.433594	0.759696	-0.528612	0.395204	0.178627	-0.401419	-0.577422	-0.276261	0.456546	0.182374	-0.300242	-0.453843	-0.0827776	-0.58212	-0.186514	-0.639081	-0.693139	0.0669814	-0.264428	0.127571	0.250926	-0.0121272	-0.11138	0.301826	1
T_36237_c0_g1	WRKY	gi|356500286|ref|XP_003518964.1| PREDICTED: nuclear transcription factor Y subunit B-5 [Glycine max] 5.2e-67	GO:0003700, DNA binding transcription factor activity;GO:0005634, nucleus;GO:0006351, transcription, DNA-templated;GO:0006355, regulation of transcription, DNA-templated;GO:0043565, sequence-specific DNA binding	-	-0.208787	-0.519537	-0.415924	-0.495657	0.211571	-0.538333	0.0593948	-0.2178	0.396184	-0.422839	-0.393827	0.186083	-0.0254776	-0.241876	0.328115	-0.33783	-0.0290796	-0.215452	-0.158439	-0.425429	-0.130513	-0.239949	0.151789	0.0999695	0.0561938	0.211215	-0.711712	-0.40911	0.126325	-0.190942	0.531644	-0.487623	1
T_29681_c0_g1	C2H2	gi|586829875|gb|AHJ81057.1| NAC domain transcription factor [Glycine soja] 5.6e-183	GO:0003677, DNA binding;GO:0003700, DNA binding transcription factor activity;GO:0005634, nucleus;GO:0006351, transcription, DNA-templated;GO:0006355, regulation of transcription, DNA-templated;GO:0009834, plant-type secondary cell wall biogenesis;GO:0010047, fruit dehiscence;GO:0045893, positive regulation of transcription, DNA-templated	-	0.123894	-0.169486	-0.265504	0.100327	-0.566616	-0.189104	0.767303	0.416213	0.515251	0.0405371	-0.0888139	-0.0896687	-0.095627	-0.421052	0.174093	-0.451405	-0.469189	-0.390688	-0.44286	-0.492349	0.347073	0.0706667	0.483561	0.0208139	0.131707	-0.170578	-0.19435	-0.313631	-0.160647	0.170431	-0.26371	-0.328943	1
T_42413_c1_g2	NAC	gi|947059517|gb|KRH08923.1| hypothetical protein GLYMA_16G181700 [Glycine max] 0.0e+00	GO:0046872, metal ion binding	-	-0.00971918	-0.410659	-0.530266	0.207813	0.211617	-0.163817	-0.116538	-0.301597	-0.540293	0.74293	-0.62503	0.399257	0.483046	-0.360699	-0.437662	-0.210089	0.584265	0.411282	-0.176279	-0.348711	-0.332062	-0.490366	-0.192678	-0.563206	-0.69449	0.180398	-0.228327	0.198898	0.226451	-0.336017	0.274253	0.502641	1
T_44972_c0_g1	NF-Y->NF-YA	gi|356505443|ref|XP_003521500.1| PREDICTED: nuclear transcription factor Y subunit A-10 [Glycine max] 4.3e-83	GO:0003677, DNA binding;GO:0003700, DNA binding transcription factor activity;GO:0006351, transcription, DNA-templated;GO:0006355, regulation of transcription, DNA-templated;GO:0009567, double fertilization forming a zygote and endosperm;GO:0016602, CCAAT-binding factor complex	-	0.0541271	-0.501655	-0.427238	-0.26262	0.561524	-0.619419	-0.237315	-0.366137	-0.0274388	-0.0790109	-0.556764	0.180762	0.490242	-0.328561	-0.0529378	-0.336558	0.455338	0.142928	-0.129398	-0.337801	-0.740204	-0.353872	-0.304585	-0.299665	-0.431068	0.304988	-0.451996	0.0760536	0.0346815	-0.201246	0.681149	0.11257	1
T_41146_c0_g1	HB->HB-HD-ZIP	gi|356521185|ref|XP_003529238.1| PREDICTED: transcription factor DIVARICATA-like [Glycine max] 2.7e-133	GO:0003677, DNA binding;GO:0005634, nucleus;GO:0006351, transcription, DNA-templated;GO:0006355, regulation of transcription, DNA-templated;GO:0009908, flower development;GO:0048262, determination of dorsal/ventral asymmetry	-	0.0159829	-0.453093	-0.427612	-0.27386	0.50376	-0.69094	-0.133458	-0.210249	0.201113	-0.128276	-0.566249	0.211045	0.446766	-0.347308	0.0981222	-0.483568	0.342393	-0.0380333	-0.195786	-0.423157	-0.738228	-0.175959	-0.136946	-0.141484	-0.295049	0.374564	-0.512334	-0.0241323	-0.0123592	-0.0829195	0.63838	0.0220368	1
T_45466_c0_g1	C2H2	gi|571511635|ref|XP_006596452.1| PREDICTED: uncharacterized protein LOC102667674 [Glycine max] 1.4e-107	GO:0003700, DNA binding transcription factor activity;GO:0005634, nucleus;GO:0005794, Golgi apparatus;GO:0006351, transcription, DNA-templated;GO:0006970, response to osmotic stress;GO:0009408, response to heat;GO:0009409, response to cold;GO:0009414, response to water deprivation;GO:0009651, response to salt stress;GO:0010120, camalexin biosynthetic process;GO:0010200, response to chitin;GO:0010…	-	-0.287248	-0.692598	-0.667863	-0.425823	0.0170277	-0.749219	0.190266	-0.156128	0.221258	0.0114008	-0.626057	0.202786	0.228092	-0.576042	0.216833	-0.616344	0.0203498	-0.125838	-0.501156	-0.605542	-0.475653	-0.351431	0.249408	-0.0485974	-0.223378	0.593294	-0.645441	-0.545201	-0.245938	-0.260965	0.284667	-0.291663	1
T_45029_c4_g3	C2C2->C2C2-LSD	gi|356519041|ref|XP_003528183.1| PREDICTED: probable WRKY transcription factor 61 [Glycine max] 7.3e-99	GO:0003700, DNA binding transcription factor activity;GO:0005634, nucleus;GO:0006351, transcription, DNA-templated;GO:0043565, sequence-specific DNA binding	-	-0.0649339	0.400413	0.575051	-0.0977547	0.0739947	0.453978	-0.23821	0.172236	0.172829	-0.43035	0.647855	-0.497168	-0.323641	0.502509	0.138962	0.470731	-0.250727	0.00723751	0.576196	0.636782	0.270673	0.487932	0.423025	0.574501	0.807165	-0.0813676	0.456604	-0.159506	-0.193128	-0.0938353	-0.28582	-0.0884074	1
T_39804_c0_g5	HB->HB-other	gi|356526358|ref|XP_003531785.1| PREDICTED: ABSCISIC ACID-INSENSITIVE 5-like protein 2 isoform X1 [Glycine max] 5.2e-112	GO:0003700, DNA binding transcription factor activity;GO:0005634, nucleus;GO:0006351, transcription, DNA-templated;GO:0009737, response to abscisic acid;GO:0009738, abscisic acid-activated signaling pathway;GO:0043565, sequence-specific DNA binding	K14432-ko04075 Plant hormone signal transduction	-0.0706768	-0.547093	-0.574108	-0.251622	0.235761	-0.720908	0.269455	-0.0543146	0.326037	0.0435965	-0.66911	0.183544	0.371328	-0.598692	0.205317	-0.601983	0.184109	-0.322905	-0.517356	-0.659263	-0.410085	-0.32404	0.160133	-0.23526	-0.226918	0.284298	-0.620717	-0.16755	0.118086	-0.137902	0.575201	-0.244992	1
T_42581_c1_g1	C3H	gi|359807065|ref|NP_001241597.1| heat shock factor [Glycine max] 3.9e-82	GO:0003700, DNA binding transcription factor activity;GO:0005634, nucleus;GO:0006351, transcription, DNA-templated;GO:0043565, sequence-specific DNA binding	-	-0.0386173	-0.0489702	0.0260635	-0.374018	0.10257	-0.230944	0.174189	0.241523	0.58715	-0.594695	0.105246	-0.194373	-0.204556	0.223375	0.534468	-0.166598	-0.383171	-0.299841	0.0484054	0.084138	0.212274	0.326895	0.517613	0.8379	0.650612	0.0931905	-0.315954	-0.600777	-0.044667	0.152598	0.228049	-0.39697	1
T_40723_c4_g1	MYB->MYB	gi|1012334528|gb|KYP45886.1| hypothetical protein KK1_032565 [Cajanus cajan] 5.9e-52	GO:0003677, DNA binding;GO:0003700, DNA binding transcription factor activity;GO:0005634, nucleus;GO:0006351, transcription, DNA-templated;GO:0006355, regulation of transcription, DNA-templated;GO:0009793, embryo development ending in seed dormancy;GO:0010431, seed maturation	-	0.0237015	0.0577094	0.181353	-0.311283	0.00571875	-0.13862	0.168068	0.296296	0.443997	-0.696534	0.283291	-0.255373	-0.0598813	0.332903	0.472288	0.000943069	-0.277394	-0.0698415	0.154	0.263557	0.200547	0.380881	0.106814	0.70793	0.437385	0.0557995	-0.180661	-0.381021	-0.325471	0.132204	0.214292	-0.227436	1
T_43449_c1_g2	HB->HB-other	gi|734367912|gb|KHN18558.1| Dof zinc finger protein DOF3.3 [Glycine soja] 3.7e-208	GO:0003677, DNA binding;GO:0003700, DNA binding transcription factor activity;GO:0005634, nucleus;GO:0006351, transcription, DNA-templated;GO:0006355, regulation of transcription, DNA-templated;GO:0009908, flower development;GO:0046872, metal ion binding	-	-0.0991645	-0.52723	-0.47848	-0.245817	0.314171	-0.704259	0.171401	-0.137846	0.370259	-0.160256	-0.533586	0.0619729	0.402936	-0.544319	0.211983	-0.487274	0.129204	-0.189201	-0.349514	-0.573523	-0.549044	-0.310168	0.0285477	-0.26445	-0.205868	0.315276	-0.556435	-0.0963609	-0.0431985	-0.203679	0.480813	-0.224245	1
T_41357_c1_g4	LOB	gi|734434362|gb|KHN47390.1| Heat stress transcription factor A-4a [Glycine soja] 4.3e-151	GO:0000302, response to reactive oxygen species;GO:0003700, DNA binding transcription factor activity;GO:0005634, nucleus;GO:0005737, cytoplasm;GO:0006351, transcription, DNA-templated;GO:0006355, regulation of transcription, DNA-templated;GO:0010200, response to chitin;GO:0042803, protein homodimerization activity;GO:0043565, sequence-specific DNA binding;GO:0045893, positive regulation of trans…	-	0.249646	0.0120978	0.198626	-0.0269824	0.761257	0.00874598	-0.520504	-0.40645	-0.122413	-0.316531	0.0617188	-0.00608316	0.0558858	0.40821	0.00752363	0.300161	0.260587	0.477259	0.52666	0.396932	-0.384631	0.142692	-0.21419	0.29214	0.204022	0.179007	0.0469898	0.140635	0.20859	-0.0407711	0.549972	0.292246	1
T_42615_c1_g5	HB->HB-WOX	gi|951055551|ref|XP_014521508.1| PREDICTED: transcription factor MYB44-like [Vigna radiata var. radiata] 2.9e-127	GO:0003677, DNA binding;GO:0003700, DNA binding transcription factor activity;GO:0005634, nucleus;GO:0006351, transcription, DNA-templated;GO:0009414, response to water deprivation;GO:0009651, response to salt stress;GO:0009723, response to ethylene;GO:0009733, response to auxin;GO:0009737, response to abscisic acid;GO:0009738, abscisic acid-activated signaling pathway;GO:0009739, response to gib…	-	0.213048	0.363126	0.362697	0.100989	0.155789	0.049063	0.176224	0.399638	0.603615	-0.559385	0.316468	-0.0998636	-0.238602	0.294537	0.321599	0.0105397	-0.303994	-0.365003	0.0714297	0.233493	0.232193	0.489742	0.375903	0.631328	0.710199	-0.160659	0.0810803	-0.128617	0.0882416	0.43503	0.185769	-0.173949	1
T_45020_c0_g9	FAR1	gi|571556256|ref|XP_006604239.1| PREDICTED: ethylene-responsive transcription factor RAP2-11-like [Glycine max] 1.6e-119	GO:0000302, response to reactive oxygen species;GO:0003677, DNA binding;GO:0003700, DNA binding transcription factor activity;GO:0005634, nucleus;GO:0006351, transcription, DNA-templated;GO:0009723, response to ethylene;GO:0009873, ethylene-activated signaling pathway;GO:0035865, cellular response to potassium ion;GO:0043565, sequence-specific DNA binding;GO:0048528, post-embryonic root developme…	-	0.12693	-0.0485792	-0.066355	0.411926	-0.135056	-0.153954	0.463202	0.321585	0.369897	-0.237791	0.0424452	-0.495343	0.407835	-0.451874	-0.312625	-0.249526	-0.0427227	0.0622529	-0.333651	-0.160646	-0.152874	-0.177504	0.235978	-0.218596	0.0626335	-0.319182	0.144647	-0.0699394	-0.732323	0.062002	-0.28682	0.233145	1
T_43426_c0_g1	HB->HB-other	gi|920698248|gb|KOM41473.1| hypothetical protein LR48_Vigan04g167100 [Vigna angularis] 2.6e-143	GO:0003677, DNA binding;GO:0003700, DNA binding transcription factor activity;GO:0005634, nucleus;GO:0006351, transcription, DNA-templated;GO:0009414, response to water deprivation;GO:0009651, response to salt stress;GO:0009723, response to ethylene;GO:0009733, response to auxin;GO:0009737, response to abscisic acid;GO:0009738, abscisic acid-activated signaling pathway;GO:0009739, response to gib…	-	0.0382037	0.00783376	0.091947	-0.0810931	0.684379	-0.219753	-0.195858	-0.139377	0.0537974	-0.414986	-0.0925635	0.249096	0.231607	0.297507	0.377893	0.0964698	0.0689434	0.102444	0.202855	0.169053	-0.342631	0.134582	-0.412934	0.314683	-0.0314811	0.182996	-0.221147	0.166934	0.35822	0.000799095	0.81947	0.0989477	1
T_43995_c4_g1	AP2/ERF->AP2/ERF-ERF	gi|920714999|gb|KOM55087.1| hypothetical protein LR48_Vigan10g097900 [Vigna angularis] 3.3e-63	GO:0001046, core promoter sequence-specific DNA binding;GO:0001228, transcriptional activator activity, RNA polymerase II transcription regulatory region sequence-specific DNA binding;GO:0003700, DNA binding transcription factor activity;GO:0005634, nucleus;GO:0006366, transcription by RNA polymerase II	-	-0.193581	-0.526598	-0.541623	-0.239512	0.159172	-0.718492	0.285616	0.135606	0.336068	-0.183485	-0.526405	0.171085	0.507039	-0.588046	0.0995942	-0.529032	0.133272	-0.310971	-0.504866	-0.544606	-0.365486	-0.497178	0.0275146	-0.250416	-0.32323	0.230017	-0.62845	-0.195019	-0.0603112	-0.244502	0.511687	-0.188946	1
T_44662_c1_g3	C2H2	gi|734406881|gb|KHN34110.1| Protein lin-54 like [Glycine soja] 3.7e-104	GO:0005634, nucleus;GO:0007275, multicellular organism development;GO:0046872, metal ion binding	-	-0.0895918	-0.55111	-0.600654	-0.0636561	-0.462061	-0.290749	0.327194	-0.167881	-0.124692	0.36794	-0.4971	0.396891	0.0710107	-0.668406	-0.230475	-0.393825	0.146075	-0.0289402	-0.506928	-0.693089	-0.0300923	-0.510108	-0.109665	-0.749398	-0.629572	0.0295362	-0.376144	-0.0393333	-0.11459	-0.276156	0.00482359	-0.197271	1
T_39257_c2_g2	LOB	gi|950989531|ref|XP_014504175.1| PREDICTED: heat stress transcription factor B-4b-like [Vigna radiata var. radiata] 1.9e-84	GO:0003700, DNA binding transcription factor activity;GO:0005634, nucleus;GO:0006351, transcription, DNA-templated;GO:0043565, sequence-specific DNA binding	-	-0.242834	-0.52403	-0.646447	-0.0743896	-0.243406	-0.19439	-0.125029	-0.338423	-0.54223	0.697808	-0.597455	0.445096	0.205231	-0.444846	-0.494732	-0.278119	0.437338	0.289468	-0.291646	-0.485927	-0.114718	-0.673922	-0.187617	-0.630399	-0.786113	0.236015	-0.396236	-0.0795136	0.053117	-0.326422	-0.100675	0.200553	1
T_42684_c4_g4	bZIP	gi|356536963|ref|XP_003537001.1| PREDICTED: transcription factor TCP11-like [Glycine max] 7.1e-38	GO:0003677, DNA binding;GO:0003700, DNA binding transcription factor activity;GO:0005634, nucleus;GO:0006351, transcription, DNA-templated;GO:0006355, regulation of transcription, DNA-templated	-	-0.13493	0.55644	0.620319	-0.0419242	-0.401619	0.456773	0.00584481	0.440785	0.120223	-0.462263	0.799979	-0.34656	-0.362739	0.464379	0.179367	0.444677	-0.567802	-0.225236	0.267415	0.60202	0.447964	0.382008	0.0647614	0.442063	0.469519	-0.167836	0.528602	-0.0682811	-0.310068	0.136782	-0.611203	-0.208184	1
T_42075_c1_g3	C2H2	gi|947076249|gb|KRH25089.1| hypothetical protein GLYMA_12G079800 [Glycine max] 2.2e-136	GO:0003677, DNA binding;GO:0003700, DNA binding transcription factor activity;GO:0005634, nucleus;GO:0006351, transcription, DNA-templated;GO:0008285, negative regulation of cell proliferation;GO:0030154, cell differentiation;GO:0035987, endodermal cell differentiation;GO:0045597, positive regulation of cell differentiation;GO:0045892, negative regulation of transcription, DNA-templated;GO:004589…	-	0.320716	0.000377011	0.0350831	0.074673	0.754879	-0.170705	-0.465617	-0.380336	-0.374196	0.21477	-0.237347	-0.0197839	0.444555	0.252432	-0.0605967	0.0939021	0.538036	0.540876	0.2454	0.237946	-0.566779	0.0693703	-0.414038	0.0640087	-0.20357	0.378917	0.0290289	0.361101	0.222006	0.119488	0.503174	0.592439	1
T_42148_c2_g6	AP2/ERF->AP2/ERF-ERF	gi|951055105|ref|XP_014521387.1| PREDICTED: LOW QUALITY PROTEIN: homeobox-leucine zipper protein HAT5 [Vigna radiata var. radiata] 1.5e-130	GO:0003700, DNA binding transcription factor activity;GO:0005634, nucleus;GO:0006351, transcription, DNA-templated;GO:0009637, response to blue light;GO:0009651, response to salt stress;GO:0009965, leaf morphogenesis;GO:0042803, protein homodimerization activity;GO:0043565, sequence-specific DNA binding;GO:0045893, positive regulation of transcription, DNA-templated	-	-0.326268	-0.685346	-0.626663	-0.546064	-0.115153	-0.625019	0.278964	-0.189575	0.26725	-0.0846337	-0.558973	0.387116	0.00423451	-0.511416	0.403999	-0.470649	-0.0746198	-0.322271	-0.425591	-0.691597	-0.115995	-0.347018	0.0972245	-0.214635	-0.251921	0.401197	-0.770121	-0.368105	0.0909231	-0.358564	0.42019	-0.636275	1
T_42761_c2_g2	MYB->MYB	gi|356529726|ref|XP_003533439.1| PREDICTED: transcription factor MYB39-like isoform X1 [Glycine max] 4.7e-146	GO:0003677, DNA binding;GO:0003700, DNA binding transcription factor activity;GO:0005634, nucleus	-	-0.00353435	-0.567354	-0.587066	-0.102693	0.16417	-0.721818	0.444658	0.0613257	0.570876	-0.0653117	-0.582977	0.0699258	0.289512	-0.6508	0.184932	-0.674653	-0.0330074	-0.289655	-0.497205	-0.688426	-0.373635	-0.271656	0.439257	-0.0472957	0.00732516	0.275892	-0.619522	-0.38803	-0.0186788	-0.074267	0.40888	-0.235002	1
T_40805_c6_g2	FAR1	gi|356532357|ref|XP_003534740.1| PREDICTED: putative protein FAR1-RELATED SEQUENCE 10 [Glycine max] 0.0e+00	GO:0006355, regulation of transcription, DNA-templated;GO:0008270, zinc ion binding	-	-0.129605	-0.174348	-0.326695	0.276601	0.309292	-0.541231	0.262033	0.297194	0.369574	-0.0668132	-0.421259	0.0819746	0.718047	-0.561054	-0.0989386	-0.479152	0.195182	-0.254512	-0.511055	-0.438943	-0.511258	-0.366072	0.0410945	-0.336685	-0.265749	0.109797	-0.281498	0.135529	-0.137851	-0.00934523	0.240713	0.210951	1
T_43489_c1_g2	bHLH	gi|734394457|gb|KHN28531.1| Transcription factor PIF5 [Glycine soja] 3.8e-256	GO:0003677, DNA binding;GO:0003700, DNA binding transcription factor activity;GO:0005634, nucleus;GO:0006351, transcription, DNA-templated;GO:0009585, red, far-red light phototransduction;GO:0009704, de-etiolation;GO:0010017, red or far-red light signaling pathway;GO:0010161, red light signaling pathway;GO:0010244, response to low fluence blue light stimulus by blue low-fluence system;GO:0010600,…	K16189-ko04075 Plant hormone signal transduction	-0.0683402	-0.538809	-0.629659	0.01486	-0.0525209	-0.559885	0.171644	-0.14161	-0.00713447	0.363433	-0.644208	0.336244	0.439883	-0.675912	-0.257492	-0.490217	0.429302	0.053686	-0.478567	-0.685413	-0.404046	-0.603021	-0.237074	-0.705568	-0.688727	0.34066	-0.547929	0.0711263	-0.0737382	-0.155988	0.186148	0.0740497	1
T_43297_c0_g2	CSD	gi|1012332658|gb|KYP44081.1| Glycine-rich protein 2b [Cajanus cajan] 1.6e-39	GO:0003677, DNA binding;GO:0003723, RNA binding;GO:0006355, regulation of transcription, DNA-templated;GO:0008270, zinc ion binding	-	-0.0396394	0.548586	0.533612	0.292363	-0.344275	0.769313	-0.131294	0.121841	-0.366272	0.090476	0.584596	0.111027	-0.349943	0.478816	-0.105352	0.611807	-0.22501	0.11777	0.434197	0.465688	0.533079	0.303902	-0.316636	-0.0631466	0.00916337	-0.347284	0.566561	0.424071	0.174929	-0.0154238	-0.4369	0.114614	1
T_45075_c0_g5	LOB	gi|734327159|gb|KHN05716.1| LOB domain-containing protein 1 [Glycine soja] 2.3e-84	GO:0005739, mitochondrion	-	-0.0576882	0.430349	0.448523	0.00597574	0.151457	0.0682973	0.242854	0.631299	0.464673	-0.536484	0.424082	-0.217257	0.0612787	0.39221	0.570683	0.123865	-0.470159	-0.379011	0.158235	0.406891	0.196085	0.570674	0.212991	0.775112	0.563016	-0.0260426	0.151818	-0.107787	0.0312682	0.146535	0.206452	-0.0903292	1
T_39444_c2_g3	SBP	gi|571450739|ref|XP_006578521.1| PREDICTED: squamosa promoter-binding-like protein 16 [Glycine max] 4.4e-149	GO:0003677, DNA binding;GO:0003700, DNA binding transcription factor activity;GO:0005634, nucleus;GO:0006351, transcription, DNA-templated;GO:0006355, regulation of transcription, DNA-templated;GO:0010468, regulation of gene expression;GO:0042742, defense response to bacterium;GO:0046872, metal ion binding	-	-0.177763	-0.092352	-0.180148	0.214005	0.116356	-0.134327	-0.0574474	0.0912051	-0.272518	0.173092	-0.263271	-0.0532332	0.711745	-0.342169	-0.517998	-0.0963885	0.44722	0.176716	-0.187104	-0.146499	-0.248101	-0.508443	-0.368459	-0.570399	-0.596935	-0.152083	-0.0593367	0.296107	-0.141847	-0.223524	0.070826	0.51456	1
T_39100_c1_g1	C2C2->C2C2-Dof	gi|734329640|gb|KHN06326.1| Dof zinc finger protein DOF3.7 [Glycine soja] 5.0e-116	GO:0003677, DNA binding;GO:0003700, DNA binding transcription factor activity;GO:0005634, nucleus;GO:0006351, transcription, DNA-templated;GO:0006355, regulation of transcription, DNA-templated;GO:0009409, response to cold;GO:0009416, response to light stimulus;GO:0009845, seed germination;GO:0046872, metal ion binding	-	-0.00921469	-0.615918	-0.582663	-0.37866	0.515334	-0.655027	-0.252503	-0.40412	-0.0915379	-0.0225407	-0.687136	0.352442	0.401687	-0.265595	-0.0378372	-0.393754	0.520875	0.16606	-0.209697	-0.368547	-0.514661	-0.439278	-0.165189	-0.159593	-0.401731	0.388221	-0.657087	-0.126501	0.139549	-0.187867	0.74837	0.0545582	1
T_42211_c1_g1	CSD	gi|951002460|ref|XP_014507344.1| PREDICTED: cold shock protein 1 [Vigna radiata var. radiata] 6.4e-67	GO:0003677, DNA binding;GO:0003690, double-stranded DNA binding;GO:0003697, single-stranded DNA binding;GO:0003723, RNA binding;GO:0005634, nucleus;GO:0005737, cytoplasm;GO:0006355, regulation of transcription, DNA-templated;GO:0008270, zinc ion binding;GO:0009409, response to cold;GO:0009414, response to water deprivation;GO:0009631, cold acclimation;GO:0009651, response to salt stress;GO:001050…	-	-0.04595	0.480254	0.434137	0.164958	-0.536865	0.615184	-0.039017	0.234773	-0.115381	-0.0183638	0.61006	-0.0723184	-0.499752	0.43359	-0.100004	0.411013	-0.294382	0.0218356	0.263225	0.442009	0.596706	0.264989	0.0276018	0.207856	0.251604	-0.239122	0.442971	-0.00201505	-0.175973	0.19341	-0.720563	-0.0406272	1
T_40266_c4_g5	WRKY	gi|734343142|gb|KHN10265.1| Putative WRKY transcription factor 11 [Glycine soja] 1.1e-35	GO:0003700, DNA binding transcription factor activity;GO:0005516, calmodulin binding;GO:0005634, nucleus;GO:0006351, transcription, DNA-templated;GO:0010200, response to chitin;GO:0042742, defense response to bacterium;GO:0043565, sequence-specific DNA binding	-	-0.283649	-0.139617	0.0993698	-0.48296	-0.384033	0.0721892	0.241413	0.180896	0.41085	-0.693229	0.404033	-0.244314	-0.474018	0.097573	0.380024	0.163466	-0.560878	-0.247182	0.134259	0.146761	0.543881	0.0947784	0.501858	0.437255	0.621141	-0.0236186	-0.114209	-0.6147	-0.303167	-0.33778	-0.140816	-0.704064	1
T_41232_c4_g4	BBR-BPC	gi|571470611|ref|XP_006585066.1| PREDICTED: protein BASIC PENTACYSTEINE2-like [Glycine max] 4.8e-154	GO:0003677, DNA binding;GO:0003700, DNA binding transcription factor activity;GO:0005634, nucleus;GO:0006351, transcription, DNA-templated;GO:0009723, response to ethylene;GO:0050793, regulation of developmental process	-	0.104632	0.681542	0.635626	0.506971	-0.261033	0.680302	0.179602	0.486968	-0.0829677	-0.0572703	0.67406	-0.282379	-0.0386744	0.37824	-0.0427224	0.476199	-0.382448	-0.0150038	0.297016	0.508697	0.446457	0.451809	-0.11168	0.108372	0.198173	-0.546074	0.73415	0.415911	-0.0511043	0.118757	-0.448326	0.270104	1
T_44937_c0_g1	NF-Y->NF-YA	gi|356555881|ref|XP_003546258.1| PREDICTED: nuclear transcription factor Y subunit A-7-like isoform X1 [Glycine max] 8.9e-61	GO:0003677, DNA binding;GO:0003700, DNA binding transcription factor activity;GO:0005634, nucleus;GO:0006351, transcription, DNA-templated;GO:0016602, CCAAT-binding factor complex;GO:0045892, negative regulation of transcription, DNA-templated	-	0.0604481	-0.409464	-0.317041	-0.286056	0.369175	-0.722223	0.112001	-0.0905335	0.302622	-0.370887	-0.407618	-0.13473	0.461554	-0.333752	0.187447	-0.425195	0.181146	-0.00815185	-0.353445	-0.283011	-0.537234	-0.184881	-0.0450453	0.0320683	-0.0903496	0.334968	-0.434332	-0.199668	-0.294871	0.0291154	0.550033	-0.0484344	1
T_45225_c3_g1	WRKY	gi|356551801|ref|XP_003544262.1| PREDICTED: probable WRKY transcription factor 70 [Glycine max] 1.6e-49	GO:0003700, DNA binding transcription factor activity;GO:0005634, nucleus;GO:0006351, transcription, DNA-templated;GO:0009751, response to salicylic acid;GO:0009753, response to jasmonic acid;GO:0009862, systemic acquired resistance, salicylic acid mediated signaling pathway;GO:0009864, induced systemic resistance, jasmonic acid mediated signaling pathway;GO:0010200, response to chitin;GO:0031347…	-	0.0338581	-0.538154	-0.561718	-0.215999	0.248969	-0.761689	0.1064	0.00440826	0.326898	-0.115719	-0.570753	0.171856	0.39066	-0.559739	-0.0926656	-0.615286	0.358947	-0.183736	-0.491248	-0.492934	-0.565559	-0.465354	0.10922	-0.17986	-0.243087	0.29476	-0.584844	-0.282514	-0.199415	-0.0313113	0.50308	-0.0738749	1
T_39034_c2_g1	AP2/ERF->AP2/ERF-ERF	gi|947113030|gb|KRH61332.1| hypothetical protein GLYMA_04G041200 [Glycine max] 1.3e-60	GO:0003677, DNA binding;GO:0003700, DNA binding transcription factor activity;GO:0005634, nucleus;GO:0006351, transcription, DNA-templated;GO:0009409, response to cold;GO:0009617, response to bacterium;GO:0009873, ethylene-activated signaling pathway;GO:0010200, response to chitin;GO:0010941, regulation of cell death;GO:0042742, defense response to bacterium	-	-0.130144	0.285758	0.522307	-0.221652	0.0345535	0.247626	-0.0507975	0.0855791	0.157989	-0.752999	0.638507	-0.314106	-0.281309	0.433158	0.417973	0.521545	-0.488537	-0.106595	0.326011	0.551335	0.243509	0.247488	-0.0509513	0.389797	0.504689	-0.0713903	0.315479	-0.0251033	-0.136243	-0.126241	-0.0554737	-0.383808	1
T_40967_c0_g2	GARP->GARP-G2-like	gi|955382664|ref|XP_014625870.1| PREDICTED: putative two-component response regulator ARR21 isoform X1 [Glycine max] 4.7e-147	GO:0003677, DNA binding;GO:0003700, DNA binding transcription factor activity;GO:0005634, nucleus;GO:0006351, transcription, DNA-templated;GO:0006355, regulation of transcription, DNA-templated	-	-0.215574	-0.670324	-0.600132	-0.190057	-0.425213	-0.456167	0.449045	-0.174375	0.185039	0.172436	-0.406265	0.0163787	0.0159484	-0.700375	0.044288	-0.40287	-0.113864	0.0290633	-0.499717	-0.641191	-0.053243	-0.439223	0.386846	-0.395238	-0.123043	0.495376	-0.424561	-0.436841	-0.400716	-0.348864	-0.241819	-0.389233	1
T_42116_c1_g4	GRAS	gi|734378256|gb|KHN21941.1| Scarecrow-like protein 14 [Glycine soja] 4.5e-106	GO:0005634, nucleus;GO:0006351, transcription, DNA-templated;GO:0006355, regulation of transcription, DNA-templated	-	0.282278	0.316399	0.363025	-0.117355	0.207256	-0.0614837	0.107135	0.485247	0.540213	-0.501387	0.344515	-0.43282	-0.0103901	0.311839	0.382409	-0.0646987	-0.2485	-0.339015	0.147787	0.35187	0.00869716	0.624003	0.416458	0.756008	0.691573	-0.0857616	0.187681	-0.187657	-0.180531	0.3385	0.154808	-0.0860671	1
T_42273_c1_g3	C2H2	gi|356575726|ref|XP_003555988.1| PREDICTED: zinc finger protein ZAT10 [Glycine max] 3.5e-98	GO:0003677, DNA binding;GO:0003700, DNA binding transcription factor activity;GO:0005634, nucleus;GO:0006351, transcription, DNA-templated;GO:0009414, response to water deprivation;GO:0009737, response to abscisic acid;GO:0009738, abscisic acid-activated signaling pathway;GO:0009793, embryo development ending in seed dormancy;GO:0010200, response to chitin;GO:0042538, hyperosmotic salinity respon…	-	0.0489699	-0.031482	-0.0240248	-0.205711	0.0819991	-0.323426	0.323008	0.367031	0.6979	-0.494376	0.0417758	-0.214552	-0.0937569	0.089793	0.493899	-0.317947	-0.400708	-0.349032	-0.0834242	-0.0268794	0.0938108	0.32555	0.549526	0.808118	0.598265	0.106683	-0.316355	-0.584011	-0.0941087	0.28398	0.18005	-0.29452	1
T_43283_c3_g3	GRAS	gi|734425397|gb|KHN43091.1| Chitin-inducible gibberellin-responsive protein 1 [Glycine soja] 1.0e-29	GO:0003700, DNA binding transcription factor activity;GO:0005634, nucleus;GO:0006351, transcription, DNA-templated;GO:0006355, regulation of transcription, DNA-templated;GO:0043565, sequence-specific DNA binding	-	-0.157044	-0.463116	-0.463274	-0.154606	0.147676	-0.594871	0.0440831	-0.0235931	-0.0235184	0.104898	-0.528524	-0.0314272	0.724604	-0.65484	-0.221819	-0.453364	0.330149	-0.0322524	-0.390357	-0.491176	-0.622894	-0.46896	-0.174495	-0.57887	-0.576902	0.220394	-0.304662	0.0797636	-0.26237	-0.324893	0.24956	0.167747	1
T_38092_c0_g1	Tify	gi|356531138|ref|XP_003534135.1| PREDICTED: protein TIFY 6B-like isoform X1 [Glycine max] 1.2e-149	GO:0003714, transcription corepressor activity;GO:0005634, nucleus;GO:0006351, transcription, DNA-templated;GO:0006355, regulation of transcription, DNA-templated;GO:0006952, defense response;GO:0009611, response to wounding;GO:0009867, jasmonic acid mediated signaling pathway;GO:0031347, regulation of defense response;GO:0042802, identical protein binding;GO:1903507, negative regulation of nucle…	K13464-ko04075 Plant hormone signal transduction	-0.198247	-0.273587	-0.401739	0.102866	-0.160141	-0.0362731	0.0103113	-0.229311	-0.382588	0.814218	-0.483965	0.121316	0.254341	-0.414806	-0.308262	-0.187456	0.34089	0.168155	-0.196393	-0.457129	-0.0299927	-0.340564	0.0107623	-0.605109	-0.492651	0.160332	-0.159301	0.145283	0.17925	-0.264074	-0.212871	0.217727	1
T_9893_c0_g1	HSF	gi|359806858|ref|NP_001241059.1| agamous-like MADS-box protein AGL3-like [Glycine max] 1.6e-23	GO:0003677, DNA binding;GO:0003700, DNA binding transcription factor activity;GO:0005634, nucleus;GO:0006351, transcription, DNA-templated;GO:0009266, response to temperature stimulus;GO:0009908, flower development;GO:0009910, negative regulation of flower development;GO:0010048, vernalization response;GO:0030154, cell differentiation;GO:0042752, regulation of circadian rhythm	-	-0.193792	-0.35817	-0.401359	-0.366384	0.0820223	-0.472164	-0.101983	-0.125238	0.122621	0.105966	-0.368272	0.44958	-0.124098	-0.129427	0.275922	-0.328828	0.000652417	-0.195741	-0.270671	-0.255573	-0.236163	-0.165396	0.285909	0.210047	0.0312027	0.775173	-0.464532	-0.400728	0.134751	-0.00601375	0.124292	-0.319683	1
T_43090_c2_g2	GARP->GARP-ARR-B	gi|356515054|ref|XP_003526216.1| PREDICTED: two-component response regulator ARR12 [Glycine max] 4.6e-201	GO:0000160, phosphorelay signal transduction system;GO:0003677, DNA binding;GO:0003700, DNA binding transcription factor activity;GO:0005634, nucleus;GO:0006351, transcription, DNA-templated;GO:0009736, cytokinin-activated signaling pathway	K14491-ko04075 Plant hormone signal transduction	0.104846	0.30307	0.158993	0.573616	0.379936	0.0923736	-0.139357	0.328615	-0.107853	0.184944	-0.0211639	-0.0162388	0.645468	-0.106007	-0.502617	-0.00335066	0.398073	0.086418	0.0530482	0.121139	-0.416035	-0.0471747	-0.206396	-0.298069	-0.260844	-0.228266	0.326277	0.518895	-0.00172107	0.0160203	0.11763	0.751396	1
T_43090_c2_g5	GARP->GARP-ARR-B	gi|734432589|gb|KHN46344.1| Two-component response regulator ARR12 [Glycine soja] 0.0e+00	GO:0000160, phosphorelay signal transduction system;GO:0003677, DNA binding;GO:0003700, DNA binding transcription factor activity;GO:0005634, nucleus;GO:0006351, transcription, DNA-templated;GO:0009736, cytokinin-activated signaling pathway	K14491-ko04075 Plant hormone signal transduction	0.113222	-0.166705	-0.274841	0.361218	0.473476	-0.352481	0.0432137	0.116983	0.145437	0.189251	-0.417677	-0.241634	0.767012	-0.475093	-0.427315	-0.404737	0.498868	0.10598	-0.206508	-0.282559	-0.627243	-0.285755	0.108979	-0.310694	-0.225826	-0.113351	-0.0956724	0.136852	-0.202186	-0.0490219	0.236876	0.575697	1
T_34276_c0_g1	AP2/ERF->AP2/ERF-ERF	gi|356532535|ref|XP_003534827.1| PREDICTED: protein FAR1-RELATED SEQUENCE 11-like [Glycine max] 0.0e+00	GO:0005634, nucleus;GO:0006355, regulation of transcription, DNA-templated;GO:0008270, zinc ion binding	-	0.30844	0.485266	0.485532	0.510772	0.697664	0.330185	-0.418562	0.0542955	-0.181065	-0.0562242	0.227837	-0.0849618	0.402664	0.368484	-0.290598	0.369888	0.376559	0.323561	0.50542	0.486588	-0.33223	0.308642	-0.330209	-0.0171073	0.0556363	-0.244544	0.50049	0.69136	0.221037	0.0814303	0.324794	0.735353	1
T_34953_c0_g2	zn-clus	gi|734362350|gb|KHN16034.1| Zinc finger CCCH domain-containing protein 3 [Glycine soja] 2.6e-26	GO:0003677, DNA binding;GO:0008270, zinc ion binding	-	-0.345455	-0.451379	-0.416409	-0.319702	-0.710484	-0.133989	0.518954	0.194447	0.27396	-0.152883	-0.0842386	0.236554	-0.282644	-0.357831	0.194119	-0.262354	-0.389911	-0.262669	-0.308088	-0.428107	0.488214	-0.196044	0.392069	-0.0566578	0.00205184	0.0259851	-0.423152	-0.564689	-0.297802	-0.385521	-0.184073	-0.613622	1
T_43486_c0_g5	WRKY	gi|571492426|ref|XP_006592219.1| PREDICTED: auxin response factor 4-like isoform X1 [Glycine max] 0.0e+00	GO:0003677, DNA binding;GO:0003700, DNA binding transcription factor activity;GO:0005634, nucleus;GO:0006351, transcription, DNA-templated;GO:0006355, regulation of transcription, DNA-templated;GO:0009734, auxin-activated signaling pathway;GO:0010050, vegetative phase change;GO:0010158, abaxial cell fate specification	-	0.287003	0.496995	0.344568	0.492017	0.348022	0.154962	-0.0962882	0.393309	-0.105075	0.173475	0.11057	-0.059418	0.514968	0.0581783	-0.275388	0.0656232	0.273491	-0.141427	0.04916	0.222924	-0.314429	0.180512	-0.346128	-0.218312	-0.22173	-0.367231	0.468628	0.701185	0.188831	0.230859	0.184738	0.58932	1
T_46273_c1_g2	C2H2	gi|356550842|ref|XP_003543792.1| PREDICTED: nodulation-signaling pathway 2 protein-like [Glycine max] 4.0e-189	GO:0003700, DNA binding transcription factor activity;GO:0005634, nucleus;GO:0005783, endoplasmic reticulum;GO:0006351, transcription, DNA-templated;GO:0006355, regulation of transcription, DNA-templated;GO:0009877, nodulation;GO:0031965, nuclear membrane;GO:0043565, sequence-specific DNA binding	-	-0.0979629	0.358548	0.312923	0.455106	-0.536354	0.542489	0.277668	0.356599	-0.0100272	0.0133088	0.48154	-0.255012	-0.184947	0.031653	-0.293774	0.282473	-0.34503	0.0464093	0.0445616	0.223357	0.511107	0.0527907	0.216037	-0.0492547	0.212354	-0.401717	0.486753	-0.0081536	-0.311524	0.00168602	-0.722222	0.125144	1
T_43907_c2_g1	AP2/ERF->AP2/ERF-ERF	gi|359807437|ref|NP_001240879.1| uncharacterized protein LOC100777851 [Glycine max] 2.4e-76	GO:0003677, DNA binding;GO:0003700, DNA binding transcription factor activity;GO:0005634, nucleus;GO:0006351, transcription, DNA-templated;GO:0009873, ethylene-activated signaling pathway	-	0.323778	0.277449	0.244669	0.409306	0.718523	0.0471094	-0.278578	-0.0268865	-0.167559	0.102027	-0.0269878	-0.0600396	0.492747	0.156554	-0.144874	0.0831445	0.303697	0.229487	0.295392	0.234851	-0.677591	0.21904	-0.44659	-0.0150372	-0.220578	-0.202626	0.317554	0.546096	0.223092	0.101853	0.484633	0.671008	1
T_40205_c2_g1	C2H2	gi|920696021|gb|KOM39246.1| hypothetical protein LR48_Vigan03g262800 [Vigna angularis] 4.5e-147	GO:0003677, DNA binding;GO:0003700, DNA binding transcription factor activity;GO:0005634, nucleus;GO:0006351, transcription, DNA-templated;GO:0006355, regulation of transcription, DNA-templated;GO:0009887, animal organ morphogenesis;GO:0009943, adaxial/abaxial axis specification;GO:0009944, polarity specification of adaxial/abaxial axis;GO:0009956, radial pattern formation;GO:0010051, xylem and p…	-	0.0950761	-0.193355	-0.207448	0.09586	0.0885554	0.0818972	-0.0463459	-0.284974	-0.219792	0.392289	-0.223534	0.505231	-0.274757	-0.073747	-0.11318	0.0891398	0.114054	0.0263284	0.0295762	-0.172405	0.115802	-0.308024	-0.0242726	-0.240023	-0.153841	0.0692807	-0.189156	0.0811816	0.710203	-0.153433	0.297632	-0.0970502	1
T_41629_c1_g2	C3H	gi|965608039|dbj|BAT94530.1| hypothetical protein VIGAN_08114100 [Vigna angularis var. angularis] 2.6e-116	GO:0003677, DNA binding;GO:0003700, DNA binding transcription factor activity;GO:0005634, nucleus;GO:0006351, transcription, DNA-templated;GO:0006355, regulation of transcription, DNA-templated	-	0.1456	-0.583915	-0.72544	-0.224758	-0.19472	-0.417681	-0.085821	-0.307693	-0.221701	0.626043	-0.669806	0.131227	0.109004	-0.454205	-0.476959	-0.604706	0.458794	0.16815	-0.339877	-0.576825	-0.201171	-0.470769	0.132879	-0.317461	-0.509596	0.116059	-0.498165	-0.337737	-0.0789425	0.0832346	-0.106987	0.138059	1
T_42698_c2_g1	WRKY	gi|920700854|gb|KOM44079.1| hypothetical protein LR48_Vigan05g168400 [Vigna angularis] 1.3e-151	GO:0003700, DNA binding transcription factor activity;GO:0005634, nucleus;GO:0006351, transcription, DNA-templated;GO:0043565, sequence-specific DNA binding	K14431-ko04075 Plant hormone signal transduction	-0.300006	-0.691904	-0.641518	-0.225016	-0.156426	-0.597292	0.389068	-0.0389685	0.312536	-0.144942	-0.459759	-0.0902494	0.294673	-0.750005	-0.0570672	-0.505149	-0.00830839	-0.105272	-0.567909	-0.605041	-0.201993	-0.621998	0.400039	-0.332542	-0.131872	0.203593	-0.515276	-0.497735	-0.481668	-0.398831	-0.000721443	-0.304708	1
T_46177_c0_g1	bZIP	gi|955355296|ref|XP_003540372.3| PREDICTED: zinc finger CCCH domain-containing protein 2-like [Glycine max] 1.6e-170	GO:0003677, DNA binding;GO:0003700, DNA binding transcription factor activity;GO:0005634, nucleus;GO:0006351, transcription, DNA-templated;GO:0006355, regulation of transcription, DNA-templated;GO:0010187, negative regulation of seed germination;GO:0046872, metal ion binding	-	-0.182444	-0.109125	-0.241734	0.12887	-0.499075	-0.308018	0.760814	0.398559	0.560168	0.0283562	-0.169076	0.118057	-0.00566635	-0.522404	0.366655	-0.480635	-0.554653	-0.548438	-0.543287	-0.625692	0.0465271	0.0266465	0.17969	-0.108604	-0.100309	0.0403456	-0.276394	-0.184728	-0.0810183	0.127544	-0.194865	-0.394494	1
T_40787_c1_g3	WRKY	gi|571481997|ref|XP_006588827.1| PREDICTED: trihelix transcription factor PTL-like [Glycine max] 2.1e-78	GO:0003677, DNA binding;GO:0003700, DNA binding transcription factor activity;GO:0005634, nucleus;GO:0006351, transcription, DNA-templated;GO:0006355, regulation of transcription, DNA-templated;GO:0009909, regulation of flower development;GO:0010200, response to chitin;GO:0042803, protein homodimerization activity;GO:0046621, negative regulation of organ growth;GO:0048441, petal development;GO:00…	-	-0.399922	-0.405214	-0.583693	0.069405	-0.140657	-0.609613	0.41494	0.240786	0.283533	0.0723236	-0.56538	0.248687	0.488411	-0.685149	-0.0760605	-0.609749	0.0941692	-0.236218	-0.761537	-0.628333	-0.220893	-0.558179	0.183271	-0.292585	-0.355414	0.329534	-0.550797	-0.300569	-0.285266	-0.068408	0.0244334	-0.0140512	1
T_42267_c0_g1	bHLH	gi|571493457|ref|XP_006592557.1| PREDICTED: transcription factor TCP3-like [Glycine max] 2.0e-147	GO:0003677, DNA binding;GO:0003700, DNA binding transcription factor activity;GO:0005634, nucleus;GO:0006351, transcription, DNA-templated;GO:0006355, regulation of transcription, DNA-templated;GO:0009733, response to auxin;GO:0009965, leaf morphogenesis;GO:0030154, cell differentiation;GO:0045962, positive regulation of development, heterochronic;GO:0048366, leaf development	-	-0.0177303	-0.186394	-0.266244	0.0703976	-0.745383	0.147122	0.33433	0.109338	-0.166114	0.352557	-0.0263261	0.0661383	-0.229047	-0.284544	-0.337564	-0.129696	-0.115842	0.0330936	-0.301527	-0.227908	0.469668	-0.267242	0.239003	-0.267101	-0.178768	-0.174714	0.00595091	-0.275888	-0.26794	-0.0601192	-0.532356	-0.094139	1
T_42812_c2_g4	FAR1	gi|593475935|ref|XP_007140796.1| hypothetical protein PHAVU_008G142900g, partial [Phaseolus vulgaris] 6.8e-133	GO:0005622, intracellular;GO:0008270, zinc ion binding	-	-0.140924	0.0285685	0.0467775	0.137942	0.0446201	0.491744	-0.605076	-0.513064	-0.746188	0.376815	0.036274	0.405197	-0.192929	0.207639	-0.539169	0.465744	0.321906	0.502527	0.423834	0.192079	0.0450777	-0.30247	-0.436227	-0.458992	-0.40731	-0.0878418	0.201695	0.341932	0.343665	-0.329942	-0.148526	0.313248	1
T_39845_c3_g3	HB->HB-BELL	gi|356509664|ref|XP_003523566.1| PREDICTED: BEL1-like homeodomain protein 7 [Glycine max] 2.1e-306	GO:0003677, DNA binding;GO:0003700, DNA binding transcription factor activity;GO:0005634, nucleus;GO:0006351, transcription, DNA-templated;GO:0006355, regulation of transcription, DNA-templated;GO:0048510, regulation of timing of transition from vegetative to reproductive phase	-	-0.0330654	-0.277641	-0.255228	0.123242	0.582572	-0.411864	0.0831079	0.0596153	0.0840295	-0.020562	-0.377583	-0.0207064	0.758044	-0.359586	-0.00660272	-0.228073	0.272119	0.0575721	-0.111417	-0.21138	-0.602619	-0.242851	-0.0920467	-0.227682	-0.272537	0.110988	-0.197877	0.185361	0.0386066	-0.369287	0.612957	0.317371	1
T_39288_c2_g3	C2C2->C2C2-Dof	gi|388556558|ref|NP_001253999.1| homeobox protein knotted-1-like 2-like [Glycine max] 2.3e-166	GO:0005634, nucleus;GO:0006355, regulation of transcription, DNA-templated;GO:0043565, sequence-specific DNA binding	-	0.281042	0.49821	0.426595	0.438191	0.767753	0.147956	-0.299151	0.119601	0.0320531	-0.0644143	0.0976104	0.0503786	0.369106	0.345963	0.0305738	0.167541	0.18071	0.0172292	0.393193	0.295634	-0.443473	0.443423	-0.358655	0.144469	0.0295123	-0.206913	0.313585	0.658923	0.47802	0.251886	0.495428	0.558358	1
T_38615_c1_g1	C2H2	gi|734379362|gb|KHN22497.1| hypothetical protein glysoja_041172 [Glycine soja] 5.4e-155	GO:0046872, metal ion binding	-	0.227997	0.588517	0.349305	0.491452	-0.1212	0.0362756	0.400972	0.733545	0.50438	0.0524605	0.293642	-0.0509463	0.0270077	0.0855818	0.226557	-0.128768	-0.319751	-0.528697	-0.204622	0.0932567	0.0471115	0.414205	0.126254	0.3064	0.264255	-0.00341783	0.264998	0.208792	0.0743594	0.656814	-0.278027	0.0768218	1
T_43203_c0_g9	GRAS	gi|947118283|gb|KRH66532.1| hypothetical protein GLYMA_03G112700 [Glycine max] 5.4e-98	GO:0003677, DNA binding;GO:0003700, DNA binding transcription factor activity;GO:0005634, nucleus;GO:0006351, transcription, DNA-templated;GO:0006952, defense response;GO:0009873, ethylene-activated signaling pathway;GO:0010200, response to chitin	-	-0.197225	-0.306707	-0.292592	-0.332052	-0.106324	-0.366916	0.238928	0.16695	0.484572	-0.0899069	-0.199129	-0.0630058	-0.107625	-0.216737	0.359955	-0.405188	-0.303671	-0.301844	-0.204442	-0.29115	0.0467121	0.140417	0.805544	0.443658	0.481376	0.476672	-0.349692	-0.641469	-0.131551	-0.0671307	-0.0838793	-0.380511	1
T_41103_c2_g2	Trihelix	gi|571461067|ref|XP_006581890.1| PREDICTED: zinc finger CCCH domain-containing protein 43-like [Glycine max] 4.8e-47	GO:0003677, DNA binding;GO:0005634, nucleus;GO:0046872, metal ion binding	-	0.527699	0.281146	0.214813	0.512064	0.684192	0.181444	-0.272653	0.0809516	-0.228251	0.115051	0.03079	0.0425629	0.474559	0.293582	-0.323589	0.150665	0.458605	0.358814	0.362343	0.359348	-0.358644	0.196898	-0.326599	0.0239309	-0.142084	-0.341772	0.322205	0.575699	0.258292	0.129812	0.513858	0.790014	1
T_43159_c0_g5	GRAS	gi|356496775|ref|XP_003517241.1| PREDICTED: scarecrow-like protein 15 [Glycine max] 6.0e-234	GO:0003700, DNA binding transcription factor activity;GO:0005634, nucleus;GO:0006351, transcription, DNA-templated;GO:0006355, regulation of transcription, DNA-templated;GO:0030154, cell differentiation;GO:0043565, sequence-specific DNA binding;GO:0048831, regulation of shoot system development	-	-0.141952	0.472365	0.352342	-0.124542	-0.0135708	0.0692718	0.066666	0.597986	0.450725	-0.303973	0.300138	-0.120042	-0.129652	0.308378	0.398735	-0.0310916	-0.409721	-0.703146	0.0305481	0.207717	0.310767	0.446498	0.337112	0.618903	0.504721	-0.1263	0.071833	-0.110526	0.265573	0.348239	-0.0874107	-0.242211	1
T_44592_c1_g2	C2H2	gi|571488899|ref|XP_006591066.1| PREDICTED: transcription factor E2FB-like [Glycine max] 1.5e-205	GO:0003677, DNA binding;GO:0003700, DNA binding transcription factor activity;GO:0005634, nucleus;GO:0005667, transcription factor complex;GO:0005737, cytoplasm;GO:0006351, transcription, DNA-templated;GO:0007049, cell cycle;GO:0008284, positive regulation of cell proliferation;GO:0009733, response to auxin;GO:0010090, trichome morphogenesis;GO:0045893, positive regulation of transcription, DNA-t…	K06620-ko04110 Cell cycle	-0.0236434	0.57686	0.510915	0.41152	0.173497	0.242955	0.0789768	0.395402	-0.0305476	-0.0166929	0.313831	-0.0985599	0.379204	0.137604	0.103519	0.30866	-0.066098	-0.214149	0.108769	0.262218	-0.108032	0.213829	-0.548086	-0.203157	-0.189464	-0.231822	0.430854	0.721829	0.233704	0.0739054	0.0886496	0.282454	1
T_41085_c0_g1	Trihelix	gi|356531537|ref|XP_003534334.1| PREDICTED: beta-amylase 8-like [Glycine max] 3.8e-212	GO:0000272, polysaccharide catabolic process;GO:0003700, DNA binding transcription factor activity;GO:0005634, nucleus;GO:0005737, cytoplasm;GO:0016161, beta-amylase activity;GO:0048831, regulation of shoot system development	K01177-ko00500 Starch and sucrose metabolism	-0.108522	0.384038	0.189029	0.489262	-0.132517	0.118663	0.518648	0.733927	0.368131	-0.114819	0.214532	-0.201239	0.326608	-0.130552	-0.000456872	-0.035172	-0.219384	-0.462964	-0.286016	0.0171312	0.293289	-0.0548438	0.124772	-0.0270286	0.0818206	-0.490521	0.160663	0.182834	-0.0209466	0.140893	-0.173758	0.0946852	1
T_46837_c0_g3	bHLH	gi|734370616|gb|KHN19374.1| Homeobox-leucine zipper protein HAT5 [Glycine soja] 9.5e-147	GO:0003700, DNA binding transcription factor activity;GO:0005634, nucleus;GO:0006351, transcription, DNA-templated;GO:0009637, response to blue light;GO:0009651, response to salt stress;GO:0009965, leaf morphogenesis;GO:0042803, protein homodimerization activity;GO:0043565, sequence-specific DNA binding;GO:0045893, positive regulation of transcription, DNA-templated	-	0.134634	0.594478	0.452757	0.427985	-0.309601	0.242122	0.573201	0.729384	0.490044	-0.13935	0.475649	-0.261703	-0.0339575	0.0618898	0.319032	0.0216826	-0.563706	-0.581807	-0.094677	0.0908235	0.239136	0.465022	0.00603034	0.16453	0.218302	-0.485328	0.39388	0.273435	-0.0146435	0.393066	-0.308728	-0.111473	1
T_40246_c0_g1	FAR1	gi|965607840|dbj|BAT94331.1| hypothetical protein VIGAN_08092800 [Vigna angularis var. angularis] 8.1e-14	GO:0003677, DNA binding;GO:0003700, DNA binding transcription factor activity;GO:0005634, nucleus;GO:0006351, transcription, DNA-templated;GO:0009873, ethylene-activated signaling pathway	-	-0.280517	0.21053	0.271706	-0.379571	-0.0143513	0.0807133	0.0142547	0.0859644	0.140794	-0.318521	0.249101	0.232537	-0.368028	0.405752	0.765354	0.241874	-0.505341	-0.44047	0.176922	0.171412	0.27706	0.358371	-0.169387	0.43272	0.201697	0.155676	-0.0988305	-0.0091574	0.476984	-0.0243277	0.224837	-0.565694	1
T_44323_c1_g3	E2F-DP	gi|734396507|gb|KHN29773.1| Squamosa promoter-binding-like protein 1 [Glycine soja] 7.4e-245	GO:0003677, DNA binding;GO:0003700, DNA binding transcription factor activity;GO:0005634, nucleus;GO:0006351, transcription, DNA-templated;GO:0006355, regulation of transcription, DNA-templated;GO:0016021, integral component of membrane;GO:0046872, metal ion binding	-	0.14172	0.669127	0.582575	0.523064	0.59038	0.232112	-0.101833	0.361364	0.104238	-0.0751382	0.281929	-0.104535	0.391816	0.303836	0.113464	0.29057	0.105312	-0.164905	0.241922	0.400759	-0.268517	0.395453	-0.305637	0.0785213	0.1289	-0.185162	0.464627	0.714244	0.344446	0.228471	0.296009	0.441696	1
T_47449_c0_g1	MYB->MYB-related	gi|158525287|gb|ABW71517.1| transcription factor LEC1-B [Glycine latifolia] 8.4e-99	GO:0003700, DNA binding transcription factor activity;GO:0005634, nucleus;GO:0006351, transcription, DNA-templated;GO:0006355, regulation of transcription, DNA-templated;GO:0009738, abscisic acid-activated signaling pathway;GO:0033613, activating transcription factor binding;GO:0043565, sequence-specific DNA binding;GO:0045893, positive regulation of transcription, DNA-templated	-	0.0558525	-0.136312	-0.144859	0.139386	-0.0235433	0.296461	-0.386326	-0.426906	-0.645366	0.425743	-0.125997	0.231564	-0.0212381	0.169602	-0.530473	0.19812	0.505374	0.752083	0.272687	0.132677	0.0738883	-0.184131	-0.241399	-0.217038	-0.348901	0.00867386	0.029728	0.0564083	-0.0744136	-0.169552	-0.0868096	0.492137	1
T_45137_c1_g1	LOB	gi|356504036|ref|XP_003520805.1| PREDICTED: protein indeterminate-domain 2-like [Glycine max] 6.2e-96	GO:0003676, nucleic acid binding;GO:0003700, DNA binding transcription factor activity;GO:0005634, nucleus;GO:0006351, transcription, DNA-templated;GO:0006355, regulation of transcription, DNA-templated;GO:0044212, transcription regulatory region DNA binding;GO:0046872, metal ion binding	-	-0.120551	-0.510508	-0.620377	0.0183689	0.427162	-0.565039	0.00827649	-0.227401	0.0784804	0.376411	-0.790052	0.369968	0.415172	-0.516134	-0.0647683	-0.545374	0.376738	0.00287936	-0.35135	-0.614212	-0.533896	-0.360282	0.205295	-0.231342	-0.290068	0.418042	-0.564726	-0.124242	0.277514	-0.157929	0.481374	0.153839	1
T_43004_c0_g1	C2H2	gi|356502549|ref|XP_003520081.1| PREDICTED: cyclic dof factor 1-like [Glycine max] 1.2e-62	GO:0003677, DNA binding;GO:0003700, DNA binding transcription factor activity;GO:0005634, nucleus;GO:0006351, transcription, DNA-templated;GO:0006355, regulation of transcription, DNA-templated;GO:0009908, flower development;GO:0046872, metal ion binding	-	-0.220521	0.0556203	-0.036742	0.0872057	0.534839	-0.390732	-0.0595937	0.171904	0.115674	-0.0199773	-0.304947	0.00400457	0.724765	-0.223786	0.097786	-0.18841	0.277894	-0.226125	-0.224073	-0.146558	-0.531142	-0.137682	-0.235789	-0.209764	-0.255125	0.229742	-0.135471	0.365879	0.14483	-0.0406589	0.398529	0.256374	1
T_38640_c0_g1	C2H2	gi|571451699|ref|XP_003523252.2| PREDICTED: probable WRKY transcription factor 13 isoform X1 [Glycine max] 1.6e-102	GO:0001046, core promoter sequence-specific DNA binding;GO:0003700, DNA binding transcription factor activity;GO:0005634, nucleus;GO:0006351, transcription, DNA-templated;GO:0043565, sequence-specific DNA binding;GO:0044212, transcription regulatory region DNA binding;GO:0045893, positive regulation of transcription, DNA-templated;GO:1901141, regulation of lignin biosynthetic process;GO:1904369, …	-	0.171833	-0.448651	-0.388156	-0.0453342	0.656789	-0.480708	-0.259071	-0.499928	-0.167148	0.139966	-0.612146	0.263922	0.497276	-0.239828	-0.0823693	-0.246567	0.593582	0.414335	-0.0411336	-0.303201	-0.693929	-0.196553	-0.291496	-0.325915	-0.392397	0.399539	-0.356015	0.232597	0.127193	-0.166792	0.722093	0.325792	1
T_42075_c1_g5	MYB->MYB	gi|571462638|ref|XP_003526305.2| PREDICTED: myb-related protein Myb4-like [Glycine max] 3.4e-101	GO:0003677, DNA binding;GO:0005634, nucleus;GO:0006351, transcription, DNA-templated;GO:0006355, regulation of transcription, DNA-templated	-	-0.332708	-0.122117	-0.175663	-0.108656	0.00630977	-0.369834	0.424742	0.100987	0.480528	-0.0903084	-0.254645	-0.0158252	0.171043	-0.164288	0.701269	-0.321825	-0.330447	-0.2621	-0.216832	-0.431715	-0.0568609	0.23075	0.0786708	0.194616	0.0423281	0.3318	-0.449452	-0.137878	0.032255	0.0238265	0.0962992	-0.304879	1
T_39956_c0_g3	MYB->MYB-related	gi|1012362254|gb|KYP73437.1| WRKY transcription factor 6, partial [Cajanus cajan] 4.1e-81	GO:0003700, DNA binding transcription factor activity;GO:0005634, nucleus;GO:0006351, transcription, DNA-templated;GO:0009873, ethylene-activated signaling pathway;GO:0010200, response to chitin;GO:0016036, cellular response to phosphate starvation;GO:0043565, sequence-specific DNA binding;GO:0044212, transcription regulatory region DNA binding;GO:0045892, negative regulation of transcription, DN…	-	-0.190936	-0.646625	-0.645495	-0.425988	-0.465485	-0.25648	0.189466	-0.346146	-0.0212477	0.0951131	-0.469615	0.396944	-0.344897	-0.31513	-0.0113136	-0.377145	0.0235917	0.0401137	-0.294995	-0.583584	0.310715	-0.382669	0.11647	-0.147898	-0.291648	0.000311731	-0.702519	-0.571991	-0.0325335	-0.180056	0.0873924	-0.4483	1
T_43810_c0_g5	B3->B3-ARF	gi|920692159|gb|KOM35384.1| hypothetical protein LR48_Vigan02g153400 [Vigna angularis] 5.3e-212	GO:0003677, DNA binding;GO:0005634, nucleus;GO:0006351, transcription, DNA-templated;GO:0006355, regulation of transcription, DNA-templated	-	-0.216061	-0.116744	-0.218417	0.279741	0.285887	-0.324728	0.0460706	0.0334878	0.0174069	0.0825839	-0.364905	0.0738305	0.713923	-0.374787	-0.138821	-0.236057	0.398073	0.141977	-0.312948	-0.270675	-0.490884	-0.252966	-0.204964	-0.45557	-0.389491	0.227207	-0.125636	0.306337	-0.304775	-0.134932	0.123837	0.379981	1
T_44328_c2_g6	C2H2	gi|947122101|gb|KRH70307.1| hypothetical protein GLYMA_02G082000 [Glycine max] 4.5e-159	GO:0003677, DNA binding;GO:0003700, DNA binding transcription factor activity;GO:0005634, nucleus;GO:0006351, transcription, DNA-templated	-	-0.143599	-0.502334	-0.697543	0.105458	-0.0239198	-0.407583	0.196929	-0.0412005	-0.173656	0.608136	-0.723601	0.304411	0.459055	-0.602781	-0.333473	-0.538498	0.41491	0.0525076	-0.551825	-0.586787	-0.227069	-0.581594	0.140422	-0.424847	-0.558077	0.152248	-0.453319	-0.170486	0.0156968	-0.189686	0.153853	0.24541	1
T_39487_c3_g3	WRKY	gi|947122110|gb|KRH70316.1| hypothetical protein GLYMA_02G082800 [Glycine max] 2.1e-63	GO:0003700, DNA binding transcription factor activity;GO:0005634, nucleus;GO:0005829, cytosol;GO:0006351, transcription, DNA-templated;GO:0006952, defense response;GO:0007231, osmosensory signaling pathway;GO:0008272, sulfate transport;GO:0009294, DNA mediated transformation;GO:0009970, cellular response to sulfate starvation;GO:0043565, sequence-specific DNA binding;GO:0045596, negative regulati…	K20557-ko04016 MAPK signaling pathway - plant	-0.181454	-0.185343	-0.00872926	-0.397625	0.236111	-0.324137	0.0869026	0.188919	0.498302	-0.712285	0.074077	-0.303912	0.146743	0.0169138	0.370921	-0.0949977	-0.156777	-0.158756	0.0616409	0.0812124	-0.0561212	0.0883924	0.344609	0.461817	0.458602	0.155848	-0.273262	-0.421922	-0.315004	-0.221819	0.319982	-0.288164	1
T_42479_c0_g2	GARP->GARP-G2-like	gi|947123115|gb|KRH71321.1| hypothetical protein GLYMA_02G141000 [Glycine max] 8.0e-68	GO:0003700, DNA binding transcription factor activity;GO:0005516, calmodulin binding;GO:0005634, nucleus;GO:0006351, transcription, DNA-templated;GO:0043565, sequence-specific DNA binding	-	-0.109679	-0.477141	-0.456161	-0.570892	0.106358	-0.658826	0.0879129	-0.0697234	0.271115	-0.341848	-0.426295	0.280925	0.113274	-0.200754	0.367593	-0.440867	0.00396722	-0.306314	-0.340073	-0.395626	-0.160664	-0.241206	-0.0855283	0.098164	-0.206513	0.253628	-0.708452	-0.316094	0.0731709	-0.0123937	0.543158	-0.437305	1
T_43238_c2_g2	GRAS	gi|734334898|gb|KHN07885.1| Protein TIFY 10A [Glycine soja] 1.5e-54	GO:0003714, transcription corepressor activity;GO:0005634, nucleus;GO:0006351, transcription, DNA-templated;GO:0006355, regulation of transcription, DNA-templated;GO:0006952, defense response;GO:0009611, response to wounding;GO:0009753, response to jasmonic acid;GO:0031347, regulation of defense response;GO:1903507, negative regulation of nucleic acid-templated transcription;GO:2000022, regulatio…	K13464-ko04075 Plant hormone signal transduction	-0.0679635	-0.35273	-0.377422	-0.273621	0.0531465	-0.466477	0.315164	0.209031	0.620767	-0.140454	-0.332639	-0.0515864	-0.0174038	-0.266741	0.316347	-0.549648	-0.184004	-0.361766	-0.229134	-0.400178	-0.00640038	0.0870387	0.761316	0.482487	0.424818	0.226123	-0.533305	-0.660391	0.00872493	0.0287733	0.224315	-0.31496	1
T_41968_c0_g1	MYB->MYB	gi|571534029|ref|XP_003550646.2| PREDICTED: pathogenesis-related homeodomain protein-like [Glycine max] 4.9e-154	GO:0003677, DNA binding;GO:0003700, DNA binding transcription factor activity;GO:0005634, nucleus;GO:0006351, transcription, DNA-templated;GO:0006952, defense response;GO:0008270, zinc ion binding;GO:0009733, response to auxin;GO:0043565, sequence-specific DNA binding;GO:0045893, positive regulation of transcription, DNA-templated	-	-0.486141	-0.649616	-0.630191	-0.555027	-0.538729	-0.375614	0.200105	-0.055791	0.0560209	-0.00870346	-0.383216	0.126633	-0.12968	-0.447593	-0.10125	-0.370815	0.0071038	-0.118155	-0.440764	-0.464744	0.354699	-0.629859	0.399096	-0.0872947	-0.131703	0.253955	-0.687257	-0.798264	-0.276061	-0.347674	-0.145348	-0.467372	1
T_38447_c1_g2	AP2/ERF->AP2/ERF-ERF	gi|356504573|ref|XP_003521070.1| PREDICTED: ethylene-responsive transcription factor 13 [Glycine max] 2.6e-88	GO:0003677, DNA binding;GO:0003700, DNA binding transcription factor activity;GO:0005634, nucleus;GO:0006351, transcription, DNA-templated;GO:0006952, defense response;GO:0009873, ethylene-activated signaling pathway;GO:0010200, response to chitin	-	-0.0393535	-0.193781	-0.200675	-0.232487	0.052671	-0.237103	0.0759049	0.180381	0.414776	-0.0104884	-0.138021	0.0135182	-0.17301	-0.0630504	0.23332	-0.338813	-0.21162	-0.259679	-0.00440301	-0.141091	-0.0321654	0.223053	0.776874	0.565778	0.50902	0.357575	-0.253989	-0.590833	0.0544003	-0.00315095	0.0420632	-0.21043	1
T_46118_c1_g1	MADS->MADS-MIKC	gi|593797276|ref|XP_007161676.1| hypothetical protein PHAVU_001G089100g [Phaseolus vulgaris] 2.3e-136	GO:0000987, proximal promoter sequence-specific DNA binding;GO:0003700, DNA binding transcription factor activity;GO:0005634, nucleus;GO:0006351, transcription, DNA-templated;GO:0009653, anatomical structure morphogenesis;GO:0043565, sequence-specific DNA binding	-	0.0427379	0.274847	0.326585	0.0307441	0.294129	-0.239081	0.198699	0.39182	0.571747	-0.709668	0.221779	-0.195243	0.22509	0.0799715	0.394291	-0.0357567	-0.226348	-0.357775	-0.0507501	0.13434	-0.215453	0.274904	-0.14709	0.309348	0.270383	-0.0439731	0.00100228	0.108034	-0.115829	0.259518	0.368787	-0.103916	1
T_46839_c1_g3	bHLH	gi|358248638|ref|NP_001239915.1| uncharacterized protein LOC100791349 [Glycine max] 3.5e-96	GO:0003677, DNA binding;GO:0003700, DNA binding transcription factor activity;GO:0005634, nucleus;GO:0006351, transcription, DNA-templated;GO:0006952, defense response;GO:0009620, response to fungus;GO:0009651, response to salt stress;GO:0009723, response to ethylene;GO:0009737, response to abscisic acid;GO:0009753, response to jasmonic acid	-	-0.270911	-0.33417	-0.336823	-0.365645	0.0625389	-0.514721	0.265563	0.233847	0.592231	-0.283649	-0.289667	-0.188833	0.11	-0.273334	0.333778	-0.498564	-0.22613	-0.381211	-0.281917	-0.331441	-0.0247253	-0.0217364	0.714812	0.483264	0.411053	0.280153	-0.519795	-0.69675	-0.12503	-0.0430807	0.130557	-0.326293	1
T_39504_c1_g2	WRKY	gi|356518858|ref|XP_003528094.1| PREDICTED: NAC domain-containing protein 83 [Glycine max] 4.9e-71	GO:0003677, DNA binding;GO:0003700, DNA binding transcription factor activity;GO:0005634, nucleus;GO:0006351, transcription, DNA-templated;GO:0006355, regulation of transcription, DNA-templated;GO:0009651, response to salt stress;GO:0009737, response to abscisic acid;GO:0010089, xylem development;GO:0010150, leaf senescence;GO:0016032, viral process;GO:0045892, negative regulation of transcriptio…	-	-0.402066	-0.533974	-0.592802	-0.254182	-0.229342	-0.3007	-0.0448506	-0.259206	-0.308851	0.344142	-0.538375	0.254517	0.233296	-0.486609	-0.341676	-0.263123	0.513672	0.115022	-0.440817	-0.44483	0.000533201	-0.727789	-0.0442703	-0.611301	-0.548205	0.227022	-0.474514	-0.175588	-0.211831	-0.382091	-0.0318836	-0.0645103	1
T_41309_c3_g1	HB->HB-HD-ZIP	gi|734376587|gb|KHN21389.1| Nuclear transcription factor Y subunit C-9 [Glycine soja] 5.6e-99	GO:0003677, DNA binding;GO:0003700, DNA binding transcription factor activity;GO:0005634, nucleus;GO:0005737, cytoplasm;GO:0006351, transcription, DNA-templated;GO:0006355, regulation of transcription, DNA-templated;GO:0016602, CCAAT-binding factor complex;GO:0045893, positive regulation of transcription, DNA-templated	-	-0.106281	-0.174348	-0.223557	-0.173794	-0.178585	-0.342679	0.642198	0.477005	0.709047	-0.308848	-0.150696	0.00934448	0.0156185	-0.28371	0.523107	-0.456162	-0.456683	-0.646888	-0.329282	-0.439676	0.238548	0.168676	0.467975	0.291417	0.261694	-0.135825	-0.432837	-0.362961	0.084543	0.00857465	0.262484	-0.500545	1
T_37699_c1_g1	AP2/ERF->AP2/ERF-ERF	gi|356503206|ref|XP_003520402.1| PREDICTED: transcription factor bHLH18-like [Glycine max] 7.9e-109	GO:0003677, DNA binding;GO:0003700, DNA binding transcription factor activity;GO:0005634, nucleus;GO:0006351, transcription, DNA-templated;GO:0006355, regulation of transcription, DNA-templated	-	-0.211074	-0.660933	-0.467101	-0.610042	-0.163761	-0.336222	0.0572447	-0.328974	0.1876	-0.286691	-0.252127	-0.0967131	-0.291311	-0.224778	0.11395	-0.248956	-0.148212	0.0864919	-0.0837545	-0.286414	0.147859	-0.263147	0.556634	0.244034	0.27808	0.246675	-0.534839	-0.835357	-0.252127	-0.34025	0.0525292	-0.49626	1
T_44724_c1_g1	C2C2->C2C2-Dof	gi|947073024|gb|KRH21915.1| hypothetical protein GLYMA_13G266600 [Glycine max] 2.2e-103	GO:0003677, DNA binding;GO:0003700, DNA binding transcription factor activity;GO:0006351, transcription, DNA-templated;GO:0006355, regulation of transcription, DNA-templated;GO:0009742, brassinosteroid mediated signaling pathway	-	-0.0841079	-0.155638	-0.194024	-0.208621	-0.212002	-0.0922285	0.313211	0.247301	0.487112	-0.156829	-0.0619977	0.0292669	-0.331652	0.0369	0.302053	-0.275073	-0.284325	-0.269655	-0.0537183	-0.174694	0.477826	0.197376	0.70488	0.595984	0.516066	0.0211005	-0.412517	-0.653573	0.0599014	0.0815315	0.017517	-0.365268	1
T_41548_c0_g5	GRAS	gi|1012339948|gb|KYP51172.1| putative transcriptional regulator RABBIT EARS [Cajanus cajan] 2.8e-77	GO:0003677, DNA binding;GO:0003700, DNA binding transcription factor activity;GO:0005634, nucleus;GO:0006351, transcription, DNA-templated;GO:0006355, regulation of transcription, DNA-templated;GO:0046872, metal ion binding;GO:0051973, positive regulation of telomerase activity	-	-0.116201	-0.688483	-0.682368	0.0190381	-0.0163296	-0.639047	0.518894	-0.0164526	0.244475	0.0466878	-0.606875	0.00020634	0.541199	-0.804026	-0.0679506	-0.576052	0.0880934	0.043529	-0.582068	-0.695744	-0.347494	-0.543412	0.195937	-0.42109	-0.350762	0.178555	-0.521442	-0.279107	-0.339925	-0.34892	0.2567	-0.0215088	1
T_44047_c2_g1	TCP	gi|950970677|ref|XP_014500127.1| PREDICTED: protein LATERAL ROOT PRIMORDIUM 1-like [Vigna radiata var. radiata] 3.6e-120	GO:0003677, DNA binding;GO:0005634, nucleus;GO:0007275, multicellular organism development;GO:0009734, auxin-activated signaling pathway;GO:0009851, auxin biosynthetic process;GO:0042803, protein homodimerization activity;GO:0046872, metal ion binding	-	0.0436029	-0.542431	-0.611643	-0.111606	-0.18124	-0.588166	0.538799	0.109779	0.481624	-0.0787954	-0.484489	0.326115	0.0986251	-0.465809	0.239602	-0.633335	-0.154203	-0.190004	-0.458163	-0.680982	-0.0319118	-0.172704	0.217412	-0.00383663	-0.163769	0.19461	-0.700548	-0.383607	-0.058896	0.0388435	0.275119	-0.292718	1
T_41953_c2_g5	MYB->MYB	gi|908212368|tpg|DAA64927.1| TPA_inf: dof protein [Cajanus cajan] 2.9e-47	GO:0003677, DNA binding;GO:0003700, DNA binding transcription factor activity;GO:0005634, nucleus;GO:0006351, transcription, DNA-templated;GO:0006355, regulation of transcription, DNA-templated;GO:0044212, transcription regulatory region DNA binding;GO:0046872, metal ion binding	-	-0.140673	-0.38315	-0.565584	-0.101117	0.191968	-0.701966	0.16173	0.150026	0.240208	0.164654	-0.686253	0.27713	0.504984	-0.530305	-0.052838	-0.652903	0.274255	-0.331837	-0.589684	-0.592714	-0.332662	-0.451064	0.11007	-0.163228	-0.348116	0.313988	-0.644255	-0.174886	0.185085	0.0952801	0.388829	0.0441541	1
T_39956_c0_g2	MYB->MYB-related	gi|593213171|ref|XP_007132527.1| hypothetical protein PHAVU_011G101900g [Phaseolus vulgaris] 1.2e-141	GO:0003700, DNA binding transcription factor activity;GO:0005634, nucleus;GO:0006351, transcription, DNA-templated;GO:0009873, ethylene-activated signaling pathway;GO:0010200, response to chitin;GO:0016036, cellular response to phosphate starvation;GO:0043565, sequence-specific DNA binding;GO:0044212, transcription regulatory region DNA binding;GO:0045892, negative regulation of transcription, DN…	-	-0.0297025	0.0096331	0.0713561	-0.257088	0.315746	-0.0296777	-0.165945	0.0347152	0.343605	-0.308117	0.0620201	-0.131653	-0.244343	0.299772	0.268427	-0.0243254	-0.114618	-0.118238	0.264161	0.188135	0.121088	0.308151	0.615727	0.733066	0.697716	0.12967	-0.157108	-0.46632	0.15406	0.0561775	0.184434	-0.167462	1
T_33668_c0_g1	C2H2	-	GO:0000156, phosphorelay response regulator activity;GO:0003677, DNA binding;GO:0003700, DNA binding transcription factor activity;GO:0005634, nucleus;GO:0006351, transcription, DNA-templated;GO:0009736, cytokinin-activated signaling pathway;GO:0042802, identical protein binding	-	0.236425	-0.257585	-0.180664	0.0312678	0.38781	-0.181035	0.115116	-0.218268	-0.0417597	-0.114735	-0.258195	0.180347	0.224692	0.158534	0.242071	-0.0417794	0.162951	0.463394	0.136223	-0.0317976	-0.0712049	0.1102	-0.262891	0.238659	-0.131914	0.0757626	-0.356164	-0.0164658	0.158001	-0.0560885	0.739792	0.219188	1
T_42848_c1_g2	LOB	gi|356555418|ref|XP_003546029.1| PREDICTED: dof zinc finger protein DOF1.5-like isoform X2 [Glycine max] 8.5e-75	GO:0003677, DNA binding;GO:0003700, DNA binding transcription factor activity;GO:0005634, nucleus;GO:0006351, transcription, DNA-templated;GO:0006355, regulation of transcription, DNA-templated;GO:0044212, transcription regulatory region DNA binding;GO:0046872, metal ion binding	-	-0.18405	-0.319489	-0.142476	-0.288489	0.310415	0.113322	-0.588215	-0.724418	-0.634417	0.267622	-0.163477	-0.0506808	0.00604214	0.0936598	-0.238506	0.344126	0.423077	0.569781	0.345242	0.146288	-0.130586	-0.37191	-0.134593	-0.283526	-0.168377	0.254365	-0.0217967	0.0434522	0.141483	-0.539852	0.049625	0.108019	1
T_35622_c0_g1	AP2/ERF->AP2/ERF-ERF	gi|356507032|ref|XP_003522275.1| PREDICTED: probable WRKY transcription factor 50 [Glycine max] 1.4e-78	GO:0003700, DNA binding transcription factor activity;GO:0005634, nucleus;GO:0006351, transcription, DNA-templated;GO:0009867, jasmonic acid mediated signaling pathway;GO:0043565, sequence-specific DNA binding;GO:0050832, defense response to fungus	-	0.154433	-0.387779	-0.283646	-0.338705	-0.0167765	-0.459487	-0.0073443	-0.298603	0.088901	0.139442	-0.312315	0.180763	-0.151038	-0.221191	0.23514	-0.296654	0.0376815	0.0623915	-0.197396	-0.28142	-0.354751	0.0838816	0.175228	0.0339056	0.0539928	0.801933	-0.249635	-0.249459	-0.10895	0.0626529	0.131293	-0.252167	1
T_41841_c1_g1	bHLH	gi|356550823|ref|XP_003543783.1| PREDICTED: myb-related protein 306 [Glycine max] 3.3e-151	GO:0003677, DNA binding;GO:0005634, nucleus;GO:0006351, transcription, DNA-templated;GO:0006355, regulation of transcription, DNA-templated	-	0.235367	0.121819	0.27039	0.0593268	0.465989	0.0159818	0.0532667	0.0204868	0.356558	-0.531008	0.238177	-0.215538	-0.015076	0.456872	0.457046	0.16553	-0.0954477	0.288227	0.40629	0.366314	-0.0501133	0.525436	0.0784714	0.708922	0.537956	0.0632522	-0.023873	-0.128726	-0.116135	0.104363	0.452102	0.0761167	1
T_36918_c0_g1	MYB->MYB	gi|1012357499|gb|KYP68684.1| hypothetical protein KK1_022323 [Cajanus cajan] 3.8e-38	GO:0005634, nucleus;GO:0006351, transcription, DNA-templated;GO:0045892, negative regulation of transcription, DNA-templated	-	-0.405784	-0.690475	-0.658685	-0.154029	-0.189799	-0.313791	0.215053	-0.313309	-0.172846	0.215887	-0.526456	0.295575	0.119796	-0.629419	-0.155599	-0.245154	0.0202427	0.0705834	-0.456418	-0.568324	0.00514654	-0.748742	0.196726	-0.532891	-0.371402	0.222459	-0.449308	-0.311663	0.00259501	-0.586642	0.0390807	-0.240845	1
T_44351_c3_g3	C2C2->C2C2-Dof	gi|358249042|ref|NP_001239983.1| protein TIFY 11B-like [Glycine max] 3.8e-44	GO:0003714, transcription corepressor activity;GO:0005634, nucleus;GO:0006351, transcription, DNA-templated;GO:0006355, regulation of transcription, DNA-templated;GO:0009611, response to wounding;GO:0031347, regulation of defense response;GO:1903507, negative regulation of nucleic acid-templated transcription;GO:2000022, regulation of jasmonic acid mediated signaling pathway	K13464-ko04075 Plant hormone signal transduction	-0.0783835	-0.270595	-0.264406	-0.23622	0.109122	-0.305276	0.173014	0.0696256	0.48469	-0.0335253	-0.297523	-0.0355558	-0.111398	-0.201362	0.272969	-0.413457	-0.134367	-0.285161	-0.0981529	-0.331681	-0.0180237	0.188963	0.756012	0.419873	0.47667	0.22979	-0.378315	-0.544651	0.115732	-0.0251169	0.210628	-0.267246	1
T_43126_c0_g1	NAC	gi|571484674|ref|XP_006589621.1| PREDICTED: protein FAR-RED IMPAIRED RESPONSE 1-like isoform X1 [Glycine max] 0.0e+00	GO:0003700, DNA binding transcription factor activity;GO:0005634, nucleus;GO:0006355, regulation of transcription, DNA-templated;GO:0008270, zinc ion binding;GO:0009639, response to red or far red light;GO:0010017, red or far-red light signaling pathway;GO:0010018, far-red light signaling pathway;GO:0010218, response to far red light;GO:0042753, positive regulation of circadian rhythm;GO:0045893,…	-	-0.0221296	-0.224627	-0.350325	0.284364	0.497735	-0.352986	0.0311689	0.0429687	-0.0109906	0.176217	-0.496983	-0.00846947	0.718331	-0.373903	-0.296137	-0.340157	0.273228	0.0891811	-0.263821	-0.28726	-0.405168	-0.376984	0.112676	-0.186986	-0.255233	-0.0142246	-0.202447	0.0761486	0.160547	-0.0911102	0.315547	0.50618	1
T_35268_c0_g1	bHLH	gi|356532368|ref|XP_003534745.1| PREDICTED: trihelix transcription factor GTL1-like [Glycine max] 8.0e-134	GO:0003677, DNA binding;GO:0003700, DNA binding transcription factor activity;GO:0005634, nucleus;GO:0006351, transcription, DNA-templated	-	-0.280952	-0.681718	-0.701272	-0.221466	-0.169059	-0.396745	0.117519	-0.156182	-0.0543178	0.358466	-0.55892	0.302221	0.168775	-0.529221	-0.135883	-0.468091	0.142845	0.123866	-0.236812	-0.563541	-0.259543	-0.425233	0.230744	-0.233447	-0.395809	0.363164	-0.544352	-0.464278	-0.163653	-0.47988	0.0715929	-0.0460311	1
T_41800_c2_g3	WRKY	gi|1012360945|gb|KYP72128.1| putative WRKY transcription factor 41 [Cajanus cajan] 5.3e-97	GO:0003677, DNA binding;GO:0003700, DNA binding transcription factor activity;GO:0005634, nucleus;GO:0006351, transcription, DNA-templated;GO:0009507, chloroplast;GO:0009751, response to salicylic acid;GO:0009816, defense response to bacterium, incompatible interaction;GO:0010150, leaf senescence;GO:0010193, response to ozone;GO:0010200, response to chitin;GO:0031347, regulation of defense respon…	-	-0.261361	-0.213889	-0.171875	-0.423695	-0.211775	-0.145169	-0.22743	-0.189882	-0.180467	0.257847	-0.120424	0.179136	-0.19202	0.0577827	0.134861	-0.0370791	0.0974922	0.137114	0.0536391	-0.0268467	-0.0352413	-0.0158627	0.0296925	0.133206	-0.0703442	0.738324	-0.256423	-0.325985	-0.1036	-0.127423	-0.175503	-0.160936	1
T_89228_c0_g1	C3H	-	GO:0003700, DNA binding transcription factor activity;GO:0005634, nucleus;GO:0006351, transcription, DNA-templated;GO:0006357, regulation of transcription by RNA polymerase II;GO:0043161, proteasome-mediated ubiquitin-dependent protein catabolic process;GO:0043565, sequence-specific DNA binding;GO:0046872, metal ion binding	-	-0.114537	0.10385	0.101171	0.264536	-0.12232	-0.0982043	0.670377	0.538021	0.732273	-0.313211	0.142457	-0.474293	0.23861	-0.312829	0.314514	-0.224031	-0.422541	-0.351192	-0.123538	-0.233141	-0.0010884	0.259524	0.346889	0.123331	0.323789	-0.261995	-0.00629332	-0.115198	-0.338909	-0.0389285	-0.0955167	-0.128105	1
T_46089_c1_g8	NF-Y->NF-YC	gi|955348908|ref|XP_014619244.1| PREDICTED: ethylene-responsive transcription factor ERF021-like [Glycine max] 5.7e-80	GO:0003677, DNA binding;GO:0003700, DNA binding transcription factor activity;GO:0005634, nucleus;GO:0006351, transcription, DNA-templated;GO:0009873, ethylene-activated signaling pathway	-	-0.0952677	-0.555483	-0.575725	-0.308824	-0.0469251	-0.611828	0.422616	-0.00718701	0.552016	-0.131546	-0.519595	0.282254	-0.0769304	-0.412901	0.398192	-0.596793	-0.186594	-0.330069	-0.438243	-0.650841	0.0142808	-0.131667	0.485806	0.183311	0.133048	0.346163	-0.758063	-0.558505	0.119173	0.0036492	0.354185	-0.501863	1
T_40600_c1_g1	GRAS	gi|571468950|ref|XP_006584520.1| PREDICTED: uncharacterized protein LOC100526917 isoform X1 [Glycine max] 2.9e-193	GO:0003677, DNA binding;GO:0005634, nucleus;GO:0006351, transcription, DNA-templated;GO:0006355, regulation of transcription, DNA-templated;GO:0008327, methyl-CpG binding;GO:0046872, metal ion binding	-	0.20525	0.783147	0.685573	0.543184	0.361851	0.23654	0.0662399	0.515972	0.206385	-0.215084	0.454464	-0.297521	0.322893	0.325182	0.142867	0.284626	-0.0764264	-0.241464	0.112051	0.474387	-0.140506	0.42515	-0.318991	0.17496	0.195921	-0.277539	0.560206	0.629675	0.111483	0.446752	0.0630774	0.368706	1
T_45288_c1_g3	NF-Y->NF-YC	gi|955392353|ref|XP_014628103.1| PREDICTED: nuclear transcription factor Y subunit C-9-like [Glycine max] 7.9e-117	GO:0003677, DNA binding;GO:0003700, DNA binding transcription factor activity;GO:0005634, nucleus;GO:0005737, cytoplasm;GO:0005829, cytosol;GO:0006351, transcription, DNA-templated	-	0.342853	-0.276697	-0.276002	0.338453	0.211185	0.129134	-0.231375	-0.5021	-0.503657	0.460513	-0.322557	0.331669	0.0169854	-0.0748118	-0.564524	-0.00630109	0.439309	0.700336	0.136186	-0.0794185	-0.245909	-0.197312	-0.113247	-0.274439	-0.329196	-0.0765	0.0364694	0.0746591	0.106576	-0.111136	0.233365	0.542625	1
T_33739_c0_g1	C2H2	gi|571438809|ref|XP_006574682.1| PREDICTED: zinc finger CCCH domain-containing protein 6-like [Glycine max] 2.4e-223	GO:0003677, DNA binding;GO:0046872, metal ion binding	-	-0.00303091	0.259147	0.140723	0.261965	-0.0204578	-0.120969	0.543107	0.727438	0.693787	-0.322784	0.141407	-0.374521	0.202466	-0.20383	0.18323	-0.304208	-0.48503	-0.626582	-0.28032	-0.0929455	0.0682256	0.210361	0.536288	0.378647	0.443294	-0.372167	0.0852498	-0.202431	-0.0658712	0.259265	-0.0635125	-0.05752	1
T_42324_c0_g1	C2H2	gi|124359207|gb|ABN05718.1| FAR1; Zinc finger, SWIM-type [Medicago truncatula] 6.0e-167	GO:0005634, nucleus;GO:0006355, regulation of transcription, DNA-templated;GO:0008270, zinc ion binding	-	-0.056986	-0.465546	-0.419771	-0.347279	-0.158761	-0.491039	0.375225	0.145096	0.513829	-0.00864462	-0.333729	-0.107179	-0.0433129	-0.430863	0.273627	-0.55781	-0.206467	-0.285899	-0.295072	-0.463937	-0.0772777	0.0738998	0.76595	0.294281	0.343076	0.401114	-0.431831	-0.67817	-0.200244	-0.104373	0.0822085	-0.369818	1
T_42604_c4_g1	HSF	gi|351726427|ref|NP_001237638.1| transcription factor [Glycine max] 2.9e-148	GO:0003700, DNA binding transcription factor activity;GO:0005634, nucleus;GO:0006351, transcription, DNA-templated;GO:0009751, response to salicylic acid;GO:0009753, response to jasmonic acid;GO:0009862, systemic acquired resistance, salicylic acid mediated signaling pathway;GO:0009864, induced systemic resistance, jasmonic acid mediated signaling pathway;GO:0010200, response to chitin;GO:0031347…	-	-0.0475026	-0.438337	-0.340405	-0.146324	-0.164203	-0.482084	0.374898	0.110837	0.403229	-0.193122	-0.218965	-0.323315	0.284129	-0.550593	0.0139014	-0.422937	0.0263521	0.00830257	-0.387758	-0.354745	-0.240666	-0.137384	0.459174	-0.119526	0.1403	0.315867	-0.214139	-0.391236	-0.758246	-0.191852	-0.0857745	-0.147311	1
T_33434_c0_g1	WRKY	-	GO:0000981, RNA polymerase II transcription factor activity, sequence-specific DNA binding;GO:0003677, DNA binding;GO:0005634, nucleus;GO:0006351, transcription, DNA-templated;GO:0008270, zinc ion binding	-	0.095535	0.416648	0.5662	-0.0272974	0.323394	0.492211	-0.451527	-0.157678	-0.316914	-0.169969	0.490562	-0.142797	-0.209408	0.59605	0.0381155	0.709164	0.00566344	0.124871	0.60844	0.637047	0.223908	0.156796	-0.343136	0.112219	0.215921	-0.177371	0.404663	0.428346	0.492043	-0.075704	0.113077	0.0418075	1
T_40615_c3_g5	MYB->MYB	gi|734363731|gb|KHN16792.1| Transcription factor MYB86 [Glycine soja] 9.5e-173	GO:0003677, DNA binding;GO:0005634, nucleus;GO:0006351, transcription, DNA-templated;GO:0006355, regulation of transcription, DNA-templated	-	0.0490607	-0.592249	-0.605845	-0.0249653	0.176446	-0.536121	0.165598	-0.339349	-0.028708	0.198412	-0.703678	0.0500008	0.482925	-0.530834	-0.140179	-0.543893	0.270895	0.315476	-0.319319	-0.62696	-0.474455	-0.294396	-0.105767	-0.31577	-0.502125	0.0814174	-0.494453	-0.137751	-0.137739	-0.11692	0.385707	0.24536	1
T_36621_c0_g1	bHLH	gi|356568770|ref|XP_003552583.1| PREDICTED: transcription factor TCP13-like [Glycine max] 2.7e-178	GO:0003677, DNA binding;GO:0003700, DNA binding transcription factor activity;GO:0005634, nucleus;GO:0006351, transcription, DNA-templated;GO:0006355, regulation of transcription, DNA-templated;GO:0009507, chloroplast;GO:0009965, leaf morphogenesis;GO:0030154, cell differentiation;GO:0031347, regulation of defense response;GO:0045962, positive regulation of development, heterochronic;GO:0048366, …	-	-0.246972	-0.54559	-0.610413	-0.447304	-0.137232	-0.719028	0.109508	0.0425721	-0.02933	0.278719	-0.588081	0.193935	0.423166	-0.624233	-0.00581438	-0.554554	0.238435	-0.311455	-0.63972	-0.537805	-0.381083	-0.556033	-0.000760059	-0.401676	-0.531578	0.561984	-0.504099	-0.206759	-0.141733	-0.204007	0.132884	-0.205226	1
T_41011_c2_g3	bZIP	gi|920708944|gb|KOM50941.1| hypothetical protein LR48_Vigan08g176800 [Vigna angularis] 7.0e-65	GO:0000977, RNA polymerase II regulatory region sequence-specific DNA binding;GO:0001085, RNA polymerase II transcription factor binding;GO:0001228, transcriptional activator activity, RNA polymerase II transcription regulatory region sequence-specific DNA binding;GO:0003682, chromatin binding;GO:0003700, DNA binding transcription factor activity;GO:0005634, nucleus;GO:0005667, transcription fact…	-	0.100128	-0.100458	-0.123508	-0.13069	0.142972	-0.467341	0.396274	0.38536	0.712588	-0.495575	-0.0960121	-0.155673	0.106115	-0.0320263	0.444674	-0.438832	-0.290755	-0.311021	-0.220596	-0.140804	-0.0327229	0.242368	0.427118	0.68341	0.428989	0.110254	-0.40107	-0.503251	-0.151186	0.321498	0.316442	-0.186293	1
T_39880_c5_g4	C2H2	gi|734383926|gb|KHN24171.1| NAC domain-containing protein 74 [Glycine soja] 3.0e-70	GO:0003677, DNA binding;GO:0003700, DNA binding transcription factor activity;GO:0005634, nucleus;GO:0006351, transcription, DNA-templated;GO:0006355, regulation of transcription, DNA-templated;GO:0016021, integral component of membrane;GO:0090602, sieve element enucleation;GO:0090603, sieve element differentiation	-	-0.129002	-0.479572	-0.557089	-0.127633	0.0760078	-0.363779	-0.216979	-0.191975	-0.360469	0.399927	-0.533882	0.157631	0.420119	-0.527327	-0.586455	-0.293973	0.497426	0.0490828	-0.408504	-0.341814	-0.272301	-0.807802	0.0785324	-0.609349	-0.496391	0.182686	-0.246636	-0.0326895	0.0109871	-0.290945	-0.00559862	0.181633	1
T_87011_c0_g1	HSF	gi|593697052|ref|XP_007149008.1| hypothetical protein PHAVU_005G032800g [Phaseolus vulgaris] 1.8e-31	GO:0000989, transcription factor activity, transcription factor binding;GO:0003700, DNA binding transcription factor activity;GO:0005634, nucleus;GO:0006351, transcription, DNA-templated;GO:0006355, regulation of transcription, DNA-templated;GO:0009739, response to gibberellin;GO:0043565, sequence-specific DNA binding	-	-0.107538	-0.0521953	-0.0569744	0.129777	-0.0744559	-0.163089	0.543133	0.397027	0.725292	-0.361881	0.0807532	-0.429111	0.132947	-0.272704	0.254972	-0.250167	-0.325656	-0.305232	-0.137681	-0.232029	0.074341	0.0709622	0.497969	0.169347	0.398821	-0.224092	-0.156643	-0.272505	-0.352224	-0.0491881	-0.149434	-0.238617	1
T_44786_c1_g4	C2H2	gi|593798858|ref|XP_007162467.1| hypothetical protein PHAVU_001G154800g [Phaseolus vulgaris] 2.4e-192	GO:0003676, nucleic acid binding;GO:0003677, DNA binding;GO:0003700, DNA binding transcription factor activity;GO:0006351, transcription, DNA-templated;GO:0006355, regulation of transcription, DNA-templated;GO:0046872, metal ion binding	-	0.0244516	0.61463	0.628879	0.227353	0.356126	0.229058	-0.0379395	0.261351	0.422904	-0.405104	0.405964	-0.285434	-0.0393148	0.439872	0.409846	0.236037	-0.257022	-0.178602	0.382592	0.353433	-0.0388471	0.707287	-0.0108968	0.52387	0.547414	-0.103915	0.293163	0.236668	0.144419	0.34644	0.0900733	0.0876462	1
T_39262_c0_g1	LOB	gi|734413258|gb|KHN36703.1| Putative Myb family transcription factor [Glycine soja] 8.4e-131	GO:0003677, DNA binding;GO:0003700, DNA binding transcription factor activity;GO:0005634, nucleus;GO:0006351, transcription, DNA-templated;GO:0006355, regulation of transcription, DNA-templated	-	-0.0869578	-0.52344	-0.525912	-0.0522549	-0.083298	-0.10048	-0.155439	-0.298902	-0.38974	0.185757	-0.379349	0.206727	0.198932	-0.33628	-0.673511	-0.14999	0.558762	0.424584	-0.128738	-0.233762	-0.059504	-0.725697	-0.120118	-0.504826	-0.539965	-0.207152	-0.324977	-0.192174	-0.264676	-0.400391	0.105943	0.235973	1
T_43181_c0_g3	C2H2	gi|947072097|gb|KRH20988.1| hypothetical protein GLYMA_13G213400 [Glycine max] 1.4e-288	GO:0003677, DNA binding;GO:0005634, nucleus;GO:0006351, transcription, DNA-templated;GO:0006355, regulation of transcription, DNA-templated;GO:0016021, integral component of membrane;GO:0046872, metal ion binding	-	0.102221	0.233359	0.0673594	0.506657	0.523742	-0.129088	0.0776251	0.364878	0.0499611	0.170122	-0.161039	0.00418916	0.718952	-0.112961	-0.139081	-0.0997333	0.300267	-0.0757955	-0.0987496	0.0150688	-0.405061	-0.0761862	-0.242369	-0.133001	-0.257846	-0.101977	0.068591	0.465979	0.257052	0.09299	0.406004	0.585235	1
T_45380_c5_g3	TUB	gi|224107205|ref|XP_002314408.1| putative Tub family protein [Populus trichocarpa] 3.7e-08	GO:0035091, phosphatidylinositol binding	-	-0.351256	-0.56062	-0.567129	-0.378072	0.167062	-0.560999	0.257331	-0.0404021	0.281912	-0.214251	-0.574612	0.106472	0.333929	-0.315653	0.296751	-0.465242	0.0285031	-0.12718	-0.31646	-0.50925	0.0221835	-0.301127	0.212423	0.13292	-0.112141	0.115879	-0.805602	-0.465875	0.0858319	-0.266151	0.535219	-0.226967	1
T_107620_c0_g1	AP2/ERF->AP2/ERF-ERF	gi|947121007|gb|KRH69213.1| hypothetical protein GLYMA_02G012000 [Glycine max] 3.7e-46	GO:0003700, DNA binding transcription factor activity;GO:0005634, nucleus;GO:0006351, transcription, DNA-templated;GO:0006355, regulation of transcription, DNA-templated;GO:0043565, sequence-specific DNA binding	-	-0.00823767	0.280988	0.180449	0.453087	0.0804257	-0.150076	0.585681	0.654039	0.729888	-0.32796	0.161231	-0.388859	0.438828	-0.240966	0.250639	-0.213388	-0.225812	-0.398561	-0.218964	-0.115189	-0.163902	0.202684	0.150602	0.0553954	0.222111	-0.255145	0.0775415	0.156931	-0.336991	0.169898	-0.0399509	0.0495692	1
T_34704_c0_g1	MYB->MYB-related	-	-	-	0.012591	-0.274271	-0.349522	-0.187542	0.361536	-0.440723	-0.363974	-0.190939	-0.241776	0.176775	-0.474292	0.202098	0.445321	-0.27707	-0.308358	-0.365566	0.556572	0.000565015	-0.233742	-0.201706	-0.746817	-0.371766	-0.337294	-0.314448	-0.585472	0.0788483	-0.206227	0.0807375	-0.0936661	-0.040466	0.389812	0.263334	1
T_44196_c3_g1	NAC	gi|571526888|ref|XP_003547776.2| PREDICTED: transcription factor bHLH62-like [Glycine max] 4.3e-182	GO:0003677, DNA binding;GO:0003700, DNA binding transcription factor activity;GO:0005634, nucleus;GO:0006351, transcription, DNA-templated;GO:0006355, regulation of transcription, DNA-templated	-	-0.279125	-0.256282	-0.305685	0.117159	-0.14679	-0.0206894	0.18186	-0.193927	-0.215684	0.451429	-0.356689	0.238411	0.15715	-0.42932	-0.138886	-0.026768	0.232539	0.0129135	-0.244358	-0.44106	0.096041	-0.471597	-0.176495	-0.712431	-0.464792	0.0113763	-0.235834	0.234712	0.262882	-0.375778	0.0473898	-0.0630495	1
T_45020_c0_g7	FAR1	gi|734354153|gb|KHN13591.1| Ethylene-responsive transcription factor RAP2-11 [Glycine soja] 4.3e-148	GO:0000302, response to reactive oxygen species;GO:0003677, DNA binding;GO:0003700, DNA binding transcription factor activity;GO:0005634, nucleus;GO:0006351, transcription, DNA-templated;GO:0009723, response to ethylene;GO:0009873, ethylene-activated signaling pathway;GO:0035865, cellular response to potassium ion;GO:0043565, sequence-specific DNA binding;GO:0048528, post-embryonic root developme…	-	-0.156775	-0.563176	-0.611377	0.0485222	0.169423	-0.696491	0.515234	0.0750072	0.387741	-0.0322437	-0.635172	-0.0412051	0.644172	-0.701604	0.0905162	-0.633601	0.0736565	-0.0564126	-0.55669	-0.679158	-0.407331	-0.399574	0.173914	-0.216561	-0.281002	0.155991	-0.595251	-0.25982	-0.228386	-0.200985	0.386507	0.0378731	1
T_42069_c1_g2	C2H2	gi|351721764|ref|NP_001238500.1| dehydration-responsive element binding protein 3 [Glycine max] 3.6e-88	GO:0003677, DNA binding;GO:0003700, DNA binding transcription factor activity;GO:0005634, nucleus;GO:0006351, transcription, DNA-templated;GO:0009873, ethylene-activated signaling pathway	-	0.0918394	-0.0688042	-0.0964908	-0.121226	0.0461934	-0.390961	0.402588	0.436749	0.685428	-0.441061	-0.0183667	-0.22896	0.0307989	-0.0340268	0.383036	-0.416914	-0.386305	-0.345804	-0.207335	-0.091406	0.0147532	0.233785	0.539977	0.7294	0.487527	0.0631942	-0.302341	-0.58658	-0.178968	0.309166	0.156062	-0.194253	1
T_41636_c3_g3	C3H	gi|593798066|ref|XP_007162071.1| hypothetical protein PHAVU_001G121200g [Phaseolus vulgaris] 2.3e-53	GO:0003677, DNA binding;GO:0003700, DNA binding transcription factor activity;GO:0005634, nucleus;GO:0006351, transcription, DNA-templated;GO:0006355, regulation of transcription, DNA-templated;GO:0009941, chloroplast envelope;GO:0042538, hyperosmotic salinity response	-	0.162941	0.748654	0.642424	0.24196	0.261307	0.285067	-0.157208	0.486809	0.195897	-0.27348	0.498793	0.0095924	-0.00692253	0.497246	0.237663	0.259019	-0.22807	-0.444483	0.2672	0.479453	-0.03828	0.558078	-0.232666	0.345564	0.249051	-0.253823	0.479317	0.505506	0.312432	0.431099	0.0334282	0.112841	1
T_41636_c3_g4	C3H	gi|571440432|ref|XP_003520293.2| PREDICTED: transcription factor bHLH106-like [Glycine max] 7.9e-98	GO:0003677, DNA binding;GO:0003700, DNA binding transcription factor activity;GO:0005634, nucleus;GO:0006351, transcription, DNA-templated;GO:0006355, regulation of transcription, DNA-templated;GO:0009941, chloroplast envelope;GO:0042538, hyperosmotic salinity response	-	0.291426	0.441336	0.33475	0.324906	0.512787	0.104928	-0.394799	0.0907141	-0.207894	0.146063	0.0881409	0.171207	0.284764	0.174719	-0.168677	0.118414	0.219073	-0.127854	0.145224	0.267042	-0.564333	0.204373	-0.426878	-0.160572	-0.215894	-0.122969	0.479626	0.701282	0.33789	0.245824	0.226575	0.446171	1
T_42823_c2_g1	C2H2	gi|593784425|ref|XP_007155253.1| hypothetical protein PHAVU_003G186100g [Phaseolus vulgaris] 2.0e-221	GO:0003700, DNA binding transcription factor activity;GO:0005634, nucleus;GO:0006351, transcription, DNA-templated;GO:0006355, regulation of transcription, DNA-templated;GO:0043565, sequence-specific DNA binding;GO:0044212, transcription regulatory region DNA binding;GO:0046872, metal ion binding	-	-0.0915967	-0.464998	-0.505965	0.121096	0.275093	-0.584589	0.23197	0.0197038	0.172796	0.027656	-0.577912	-0.180633	0.784343	-0.610058	-0.255109	-0.521535	0.371868	0.200115	-0.404795	-0.477422	-0.502565	-0.439865	0.0829208	-0.288986	-0.328038	0.12164	-0.421707	-0.152322	-0.382292	-0.178645	0.295273	0.376285	1
T_39795_c2_g3	HB->HB-HD-ZIP	gi|965659299|dbj|BAT75718.1| hypothetical protein VIGAN_01363000 [Vigna angularis var. angularis] 1.2e-71	GO:0003700, DNA binding transcription factor activity;GO:0005634, nucleus;GO:0006351, transcription, DNA-templated;GO:0009735, response to cytokinin;GO:0043565, sequence-specific DNA binding	-	-0.287288	-0.372451	-0.408248	-0.184659	-0.258289	-0.582189	0.729488	0.41875	0.696319	-0.252613	-0.249024	-0.222515	0.255362	-0.528305	0.475861	-0.567186	-0.486062	-0.479645	-0.538585	-0.547009	0.0159291	-0.123896	0.495848	0.176859	0.131879	0.196223	-0.507637	-0.534019	-0.310439	-0.0912301	-0.0546118	-0.444752	1
T_40478_c1_g1	bZIP	gi|571452404|ref|XP_006579035.1| PREDICTED: transcription repressor OFP7-like [Glycine max] 3.0e-92	GO:0005634, nucleus;GO:0006351, transcription, DNA-templated;GO:0045892, negative regulation of transcription, DNA-templated	-	-0.0226822	-0.293207	-0.327059	-0.0923695	0.0338567	-0.636844	0.65231	0.449319	0.812052	-0.277071	-0.30046	-0.264428	0.345664	-0.48235	0.425998	-0.640854	-0.281939	-0.467249	-0.451737	-0.497457	-0.181525	0.0678626	0.543813	0.287564	0.263861	0.148725	-0.467016	-0.439849	-0.230358	0.0751998	0.248268	-0.261674	1
T_41909_c2_g5	VOZ	gi|593792608|ref|XP_007159343.1| hypothetical protein PHAVU_002G230200g [Phaseolus vulgaris] 2.4e-96	GO:0003677, DNA binding;GO:0005634, nucleus;GO:0006351, transcription, DNA-templated;GO:0006355, regulation of transcription, DNA-templated;GO:0046872, metal ion binding	-	0.151576	0.598855	0.510084	0.53184	0.271796	0.436349	-0.242807	0.19305	-0.379992	0.174204	0.314756	0.100821	0.323924	0.293917	-0.217003	0.421585	0.161949	0.0940531	0.294658	0.41875	-0.199695	0.207004	-0.663406	-0.287577	-0.329339	-0.303834	0.613585	0.863722	0.26832	0.075182	0.0598454	0.574741	1
[truncated: 56 more rows]
